# Supplementary material for: A systematic assessment of the association between frequently prescribed medicines and the risk of common cancers: a series of nested case-control studies
Source: Springer Nature journal article supplement (doi:10.1186/s12916-020-01891-5), 2021-01-26
Supplement: MOESM1 [file 18801814]

## Supplementary tables

### Index of Legends

Table S1: Comorbidity adjusted signals: exposure any prescription

Table S2: Comorbidity & smoking adjusted signals: exposure any prescription

Table S3: Comorbidity adjusted signals: exposure  $\geq 6$  prescriptions

Table S4: Comorbidity & smoking adjusted signals: exposure  $\geq 6$  prescriptions

Table S5: Sensitivity analyses for comorbidity adjusted signals: exposure any prescription

Table S6: Sensitivity analyses for comorbidity & smoking adjusted signals: exposure any prescription

Table S7: Sensitivity analyses for comorbidity adjusted signals: exposure  $\geq 6$  prescriptions

Table S8: Sensitivity analyses for comorbidity & smoking adjusted signals: exposure  $\geq 6$  prescriptions

**Table S1: Comorbidity<sup>†</sup> adjusted signals: exposure any prescription**

| Cancer                                               | Medicine         | No. (%) cases | No. (%) controls | OR (95%CI)      | p-value | Median †† | Low use v non-use: OR (95%CI) | High use v non-use: OR (95%CI) |
|------------------------------------------------------|------------------|---------------|------------------|-----------------|---------|-----------|-------------------------------|--------------------------------|
| <b>Signals associated with increased cancer risk</b> |                  |               |                  |                 |         |           |                               |                                |
| Breast §                                             | estrogen-HRT     | 2,524(20.6%)  | 10,619(18.6%)    | 1.26(1.19,1.33) | <0.001  | 7         | 1.15(1.07,1.23)               | 1.41(1.30,1.52)                |
| Breast §                                             | metronidazole*   | 188(1.5%)     | 745(1.3%)        | 1.25(1.06,1.48) | 0.007   | 1         | 1.24(1.01,1.52)               | 1.29(0.98,1.69)                |
| Breast §                                             | progestogen-HRT  | 2,339(19.1%)  | 9,706(17.0%)     | 1.28(1.21,1.35) | <0.001  | 4         | 1.07(1.00,1.16)               | 1.51(1.40,1.62)                |
| Lung                                                 | amoxicillin      | 4,380(46.2%)  | 15,145(36.5%)    | 1.40(1.33,1.48) | <0.001  | 2         | 1.32(1.24,1.40)               | 1.62(1.50,1.75)                |
| Lung                                                 | azathioprine     | 66(0.7%)      | 165(0.4%)        | 1.56(1.14,2.13) | 0.005   | 11        | 1.08(0.66,1.75)               | 2.09(1.39,3.14)                |
| Lung                                                 | cimetidine       | 880(9.3%)     | 2,685(6.5%)      | 1.39(1.27,1.51) | <0.001  | 4         | 1.30(1.16,1.47)               | 1.48(1.31,1.66)                |
| Lung                                                 | clarithromycin   | 1,108(11.7%)  | 3,083(7.4%)      | 1.34(1.23,1.46) | <0.001  | 1         | 1.34(1.21,1.47)               | 1.35(1.18,1.55)                |
| Lung                                                 | codeine          | 3,510(37.0%)  | 12,131(29.3%)    | 1.31(1.24,1.38) | <0.001  | 3         | 1.28(1.20,1.37)               | 1.33(1.24,1.43)                |
| Lung                                                 | dihydrocodeine   | 1,833(19.3%)  | 5,911(14.3%)     | 1.29(1.21,1.38) | <0.001  | 2         | 1.22(1.12,1.33)               | 1.37(1.25,1.49)                |
| Lung                                                 | folic acid §     | 273(6.5%)     | 719(3.8%)        | 1.49(1.27,1.75) | <0.001  | 6         | 1.37(1.11,1.70)               | 1.64(1.31,2.06)                |
| Lung                                                 | ipratropium*     | 1,086(11.4%)  | 1,658(4.0%)      | 1.58(1.43,1.74) | <0.001  | 8         | 1.40(1.23,1.59)               | 1.77(1.56,2.02)                |
| Lung                                                 | nitrazepam       | 231(2.4%)     | 624(1.5%)        | 1.35(1.14,1.60) | <0.001  | 10        | 1.17(0.91,1.50)               | 1.52(1.22,1.91)                |
| Lung                                                 | nystatin         | 429(4.5%)     | 1,117(2.7%)      | 1.27(1.12,1.44) | <0.001  | 1         | 1.21(1.04,1.41)               | 1.40(1.14,1.72)                |
| Lung                                                 | paracetamol      | 5,379(56.7%)  | 19,230(46.4%)    | 1.34(1.27,1.42) | <0.001  | 7         | 1.31(1.23,1.39)               | 1.39(1.30,1.48)                |
| Lung                                                 | salbutamol*      | 2,372(25.0%)  | 5,381(13.0%)     | 1.44(1.34,1.54) | <0.001  | 9         | 1.37(1.26,1.50)               | 1.52(1.39,1.66)                |
| Lung                                                 | salmeterol*      | 901(9.5%)     | 1,704(4.1%)      | 1.34(1.21,1.48) | <0.001  | 12        | 1.30(1.14,1.49)               | 1.37(1.20,1.57)                |
| Lung                                                 | tiotropium*      | 516(5.4%)     | 593(1.4%)        | 1.75(1.52,2.02) | <0.001  | 7         | 1.73(1.43,2.09)               | 1.78(1.46,2.16)                |
| Colorectal                                           | allopurinol      | 298(3.4%)     | 950(2.5%)        | 1.27(1.11,1.46) | 0.001   | 17        | 1.07(0.87,1.32)               | 1.48(1.23,1.78)                |
| Colorectal                                           | prednisolone*    | 223(2.6%)     | 728(1.9%)        | 1.31(1.12,1.54) | 0.001   | 1         | 1.31(1.06,1.62)               | 1.32(1.04,1.66)                |
| Prostate §§                                          | cerivastatin     | 86(1.2%)      | 271(0.8%)        | 1.43(1.10,1.87) | 0.008   | 8         | 1.17(0.80,1.73)               | 1.74(1.21,2.50)                |
| Prostate §§                                          | clioquinol*      | 245(3.3%)     | 851(2.7%)        | 1.30(1.11,1.52) | 0.001   | 1         | 1.23(1.01,1.49)               | 1.43(1.12,1.83)                |
| Bladder                                              | celecoxib        | 144(4.5%)     | 446(3.2%)        | 1.40(1.14,1.73) | 0.002   | 2         | 1.30(0.98,1.71)               | 1.55(1.15,2.09)                |
| Bladder                                              | dexamethasone*   | 203(6.3%)     | 677(4.9%)        | 1.30(1.10,1.54) | 0.003   | 1         | 1.29(1.03,1.61)               | 1.32(1.02,1.70)                |
| Bladder                                              | nicotine         | 152(4.7%)     | 362(2.6%)        | 2.04(1.65,2.51) | <0.001  | 2         | 1.76(1.35,2.28)               | 2.65(1.90,3.70)                |
| Bladder                                              | trimethoprim     | 562(17.4%)    | 1,388(10.0%)     | 1.96(1.73,2.21) | <0.001  | 1         | 1.81(1.56,2.09)               | 2.22(1.87,2.65)                |
| Malignant melanoma                                   | chloramphenicol* | 230(9.3%)     | 850(7.5%)        | 1.28(1.08,1.51) | 0.003   | 1         | 1.22(1.01,1.48)               | 1.42(1.08,1.88)                |
| Malignant melanoma                                   | clopidogrel      | 53(2.2%)      | 160(1.4%)        | 1.60(1.13,2.27) | 0.008   | 6         | 1.31(0.79,2.18)               | 1.89(1.21,2.96)                |
| Malignant melanoma                                   | flucloxacillin   | 349(14.2%)    | 1,317(11.6%)     | 1.28(1.11,1.46) | <0.001  | 1         | 1.24(1.06,1.46)               | 1.36(1.08,1.71)                |
| Oesophagus                                           | alginic acid     | 335(13.9%)    | 995(9.5%)        | 1.40(1.22,1.62) | <0.001  | 5         | 1.26(1.03,1.54)               | 1.56(1.29,1.89)                |
| Oesophagus                                           | azathioprine     | 22(0.9%)      | 36(0.3%)         | 2.47(1.41,4.35) | 0.002   | 9         | 2.37(1.06,5.29)               | 2.58(1.17,5.68)                |
| Oesophagus                                           | cisapride        | 30(1.2%)      | 61(0.6%)         | 2.03(1.27,3.25) | 0.003   | 3         | 2.00(1.04,3.84)               | 2.07(1.06,4.03)                |
| Oesophagus                                           | gramacidin*      | 61(2.5%)      | 174(1.7%)        | 1.52(1.11,2.09) | 0.008   | 1         | 1.52(1.05,2.19)               | 1.54(0.86,2.76)                |
| Oesophagus                                           | lansoprazole     | 363(15.1%)    | 1,192(11.4%)     | 1.35(1.17,1.55) | <0.001  | 4         | 1.10(0.91,1.33)               | 1.65(1.38,1.98)                |
| Oesophagus                                           | nicotine         | 97(4.0%)      | 300(2.9%)        | 1.50(1.16,1.94) | 0.002   | 2         | 1.48(1.08,2.02)               | 1.54(1.03,2.30)                |
| Oesophagus                                           | nystatin         | 86(3.6%)      | 230(2.2%)        | 1.58(1.21,2.06) | 0.001   | 1         | 1.47(1.05,2.06)               | 1.78(1.16,2.72)                |
| Oesophagus                                           | nystatin*        | 191(8.0%)     | 643(6.1%)        | 1.29(1.08,1.55) | 0.005   | 1         | 1.29(1.02,1.63)               | 1.30(0.99,1.70)                |
| Oesophagus                                           | omeprazole       | 490(20.4%)    | 1,596(15.2%)     | 1.39(1.23,1.57) | <0.001  | 6         | 1.26(1.06,1.48)               | 1.54(1.31,1.81)                |
| Oesophagus                                           | triamcinolone*   | 88(3.7%)      | 267(2.6%)        | 1.47(1.13,1.91) | 0.004   | 1         | 1.39(0.99,1.93)               | 1.61(1.07,2.42)                |
| Oesophagus                                           | vitamin B        | 174(7.2%)     | 514(4.9%)        | 1.36(1.12,1.65) | 0.002   | 5         | 1.20(0.92,1.56)               | 1.56(1.20,2.04)                |

Table S1 (cont)

| Cancer                        | Medicine            | No. (%) cases | No. (%) controls | OR (95%CI)      | p-value | Median †† | Low use v non-use: OR (95%CI) | High use v non-use: OR (95%CI) |
|-------------------------------|---------------------|---------------|------------------|-----------------|---------|-----------|-------------------------------|--------------------------------|
| Non-Hodgkin's lymphoma        | amoxicillin         | 798(38.4%)    | 3,040(32.4%)     | 1.34(1.19,1.50) | <0.001  | 2         | 1.28(1.13,1.45)               | 1.55(1.29,1.85)                |
| Non-Hodgkin's lymphoma        | betamethasone*      | 354(17.0%)    | 1,209(12.9%)     | 1.37(1.19,1.57) | <0.001  | 1         | 1.27(1.06,1.53)               | 1.47(1.22,1.78)                |
| Non-Hodgkin's lymphoma        | chlorhexidine*      | 59(2.8%)      | 142(1.5%)        | 1.67(1.20,2.31) | 0.002   | 1         | 1.45(0.97,2.17)               | 2.21(1.28,3.81)                |
| Non-Hodgkin's lymphoma        | clarithromycin      | 167(8.0%)     | 586(6.2%)        | 1.33(1.09,1.63) | 0.005   | 1         | 1.28(1.02,1.62)               | 1.45(1.03,2.02)                |
| Non-Hodgkin's lymphoma        | clobetasol*         | 59(2.8%)      | 151(1.6%)        | 1.73(1.25,2.38) | 0.001   | 1         | 1.56(1.01,2.40)               | 1.96(1.22,3.15)                |
| Non-Hodgkin's lymphoma        | erythromycin        | 248(11.9%)    | 918(9.8%)        | 1.26(1.07,1.49) | 0.006   | 1         | 1.17(0.95,1.43)               | 1.44(1.12,1.85)                |
| Non-Hodgkin's lymphoma        | hydroxyzine         | 35(1.7%)      | 81(0.9%)         | 1.75(1.16,2.66) | 0.008   | 1         | 1.45(0.82,2.57)               | 2.22(1.20,4.09)                |
| Non-Hodgkin's lymphoma        | methotrexate        | 19(0.9%)      | 30(0.3%)         | 2.93(1.50,5.69) | 0.002   | 11        | 2.74(1.11,6.78)               | 3.12(1.28,7.56)                |
| Non-Hodgkin's lymphoma        | prednisolone        | 199(9.6%)     | 605(6.4%)        | 1.37(1.13,1.66) | 0.001   | 2         | 1.31(1.02,1.67)               | 1.45(1.10,1.91)                |
| Non-Hodgkin's lymphoma        | prochlorperazine    | 176(8.5%)     | 614(6.5%)        | 1.30(1.08,1.58) | 0.007   | 1         | 1.20(0.94,1.53)               | 1.46(1.11,1.93)                |
| Leukaemia                     | allopurinol         | 80(4.0%)      | 221(2.5%)        | 1.57(1.20,2.06) | 0.001   | 14        | 1.38(0.93,2.05)               | 1.75(1.22,2.52)                |
| Leukaemia                     | amoxicillin         | 700(35.0%)    | 2,743(31.0%)     | 1.29(1.14,1.45) | <0.001  | 2         | 1.27(1.12,1.45)               | 1.33(1.11,1.60)                |
| Leukaemia                     | trimethoprim        | 228(11.4%)    | 855(9.7%)        | 1.26(1.06,1.49) | 0.010   | 1         | 1.10(0.89,1.36)               | 1.53(1.20,1.97)                |
| Oral (inc. Head,neck & nasal) | codeine             | 467(31.8%)    | 1,646(24.5%)     | 1.29(1.12,1.49) | <0.001  | 3         | 1.23(1.04,1.47)               | 1.37(1.13,1.65)                |
| Oral (inc. Head,neck & nasal) | flucloxacillin      | 219(14.9%)    | 793(11.8%)       | 1.36(1.13,1.62) | 0.001   | 1         | 1.29(1.05,1.59)               | 1.52(1.13,2.05)                |
| Oral (inc. Head,neck & nasal) | folic acid §        | 51(10.9%)     | 81(3.8%)         | 2.52(1.64,3.89) | <0.001  | 4         | 1.50(0.79,2.82)               | 4.03(2.27,7.17)                |
| Oral (inc. Head,neck & nasal) | nystatin            | 68(4.6%)      | 137(2.0%)        | 2.06(1.49,2.85) | <0.001  | 1         | 1.87(1.26,2.77)               | 2.50(1.46,4.27)                |
| Oral (inc. Head,neck & nasal) | vitamin B           | 214(14.6%)    | 308(4.6%)        | 2.75(2.22,3.41) | <0.001  | 4         | 2.31(1.72,3.11)               | 3.23(2.43,4.29)                |
| Oral (inc. Head,neck & nasal) | vitamin D           | 103(7.0%)     | 213(3.2%)        | 1.69(1.24,2.30) | 0.001   | 6         | 1.56(1.06,2.31)               | 1.85(1.22,2.80)                |
| Stomach                       | cimetidine          | 133(9.3%)     | 411(6.6%)        | 1.44(1.15,1.79) | 0.001   | 4         | 1.32(0.98,1.79)               | 1.56(1.15,2.11)                |
| Stomach                       | clarithromycin      | 147(10.3%)    | 466(7.5%)        | 1.35(1.08,1.69) | 0.009   | 1         | 1.25(0.97,1.63)               | 1.59(1.10,2.29)                |
| Stomach                       | digoxin             | 75(5.2%)      | 216(3.5%)        | 1.49(1.10,2.01) | 0.010   | 12        | 1.41(0.93,2.16)               | 1.56(1.04,2.32)                |
| Stomach                       | vitamin B           | 144(10.0%)    | 308(5.0%)        | 1.54(1.21,1.95) | <0.001  | 5         | 1.54(1.12,2.10)               | 1.54(1.12,2.13)                |
| Ovary §                       | phenytoin           | 14(1.0%)      | 24(0.4%)         | 3.24(1.62,6.50) | 0.001   | 27        | 2.48(0.97,6.31)               | 4.67(1.62,13.46)               |
| Ovary §                       | rabeprazole         | 18(1.3%)      | 45(0.7%)         | 2.18(1.22,3.89) | 0.009   | 2         | 1.93(0.84,4.42)               | 2.44(1.11,5.36)                |
| Kidney                        | amoxicillin         | 541(40.0%)    | 2,108(34.7%)     | 1.28(1.11,1.48) | 0.001   | 2         | 1.20(1.02,1.40)               | 1.57(1.26,1.94)                |
| Kidney                        | hydrochlorothiazide | 44(3.3%)      | 90(1.5%)         | 1.93(1.30,2.86) | 0.001   | 13        | 1.50(0.86,2.62)               | 2.50(1.45,4.31)                |
| Kidney                        | perindopril         | 63(4.7%)      | 132(2.2%)        | 1.63(1.16,2.30) | 0.005   | 10        | 1.46(0.92,2.32)               | 1.85(1.15,2.97)                |
| Pancreas                      | betamethasone*      | 205(19.2%)    | 716(15.1%)       | 1.34(1.11,1.62) | 0.003   | 1         | 1.19(0.93,1.52)               | 1.52(1.18,1.96)                |
| Pancreas                      | nicotine            | 60(5.6%)      | 151(3.2%)        | 1.94(1.38,2.73) | <0.001  | 2         | 1.91(1.24,2.94)               | 1.97(1.18,3.28)                |
| Cervix & other gynae §        | dihydrocodeine      | 136(13.1%)    | 487(10.1%)       | 1.39(1.11,1.73) | 0.004   | 2         | 1.31(0.98,1.74)               | 1.49(1.10,2.03)                |
| Cervix & other gynae §        | ranitidine          | 109(10.5%)    | 374(7.7%)        | 1.37(1.08,1.73) | 0.010   | 3         | 1.15(0.83,1.60)               | 1.64(1.18,2.26)                |
| Uterus §                      | atenolol            | 236(23.4%)    | 810(17.2%)       | 1.39(1.15,1.67) | 0.001   | 17        | 1.26(0.99,1.60)               | 1.54(1.21,1.96)                |
| Uterus §                      | bendroflumethiazide | 284(28.1%)    | 1,064(22.6%)     | 1.27(1.07,1.51) | 0.005   | 14        | 1.08(0.86,1.34)               | 1.53(1.22,1.90)                |
| Uterus §                      | bisoprolol          | 41(4.1%)      | 112(2.4%)        | 1.82(1.21,2.74) | 0.004   | 15        | 1.65(0.97,2.80)               | 2.07(1.16,3.71)                |
| Uterus §                      | doxazosin           | 47(4.7%)      | 121(2.6%)        | 1.68(1.17,2.43) | 0.005   | 9         | 1.24(0.73,2.13)               | 2.23(1.37,3.64)                |
| Uterus §                      | enalapril           | 58(5.7%)      | 149(3.2%)        | 1.66(1.18,2.33) | 0.003   | 14        | 1.16(0.69,1.94)               | 2.23(1.43,3.47)                |
| Uterus §                      | ibuprofen*          | 73(7.2%)      | 221(4.7%)        | 1.53(1.14,2.06) | 0.005   | 1         | 1.49(1.04,2.15)               | 1.60(1.01,2.54)                |

**Table S1 (cont)**

| Cancer                                               | Medicine                    | No. (%) cases | No. (%) controls | OR (95%CI)       | p-value | Median †† | Low use v non-use: OR (95%CI) | High use v non-use: OR (95%CI) |
|------------------------------------------------------|-----------------------------|---------------|------------------|------------------|---------|-----------|-------------------------------|--------------------------------|
| Uterus §                                             | mefenamic acid              | 53(5.2%)      | 171(3.6%)        | 1.72(1.22,2.42)  | 0.002   | 1         | 1.52(0.93,2.47)               | 1.92(1.22,3.03)                |
| Uterus §                                             | tranexamic acid             | 39(3.9%)      | 116(2.5%)        | 1.87(1.25,2.79)  | 0.002   | 1         | 1.65(0.99,2.76)               | 2.26(1.23,4.14)                |
| Larynx                                               | benzydamine*                | 26(3.5%)      | 50(1.5%)         | 2.33(1.34,4.04)  | 0.003   | 1         | 1.60(0.81,3.17)               | 5.09(2.00,12.98)               |
| Larynx                                               | dextropropoxyphene          | 146(19.7%)    | 423(12.7%)       | 1.51(1.19,1.92)  | 0.001   | 4         | 1.43(1.04,1.97)               | 1.59(1.16,2.17)                |
| Larynx                                               | paracetamol                 | 366(49.4%)    | 1,255(37.8%)     | 1.45(1.20,1.76)  | <0.001  | 5         | 1.41(1.13,1.77)               | 1.50(1.18,1.92)                |
| Larynx                                               | vitamin B                   | 81(10.9%)     | 134(4.0%)        | 2.40(1.72,3.36)  | <0.001  | 6         | 2.19(1.40,3.40)               | 2.66(1.68,4.21)                |
| Brain and CNS                                        | carbamazepine               | 25(3.4%)      | 61(1.8%)         | 2.20(1.34,3.62)  | 0.002   | 6         | 1.43(0.69,2.97)               | 3.37(1.72,6.62)                |
| Myeloma                                              | amoxicillin                 | 227(42.0%)    | 833(34.8%)       | 1.53(1.21,1.92)  | <0.001  | 2         | 1.45(1.13,1.85)               | 1.77(1.26,2.49)                |
| Myeloma                                              | ciprofloxacin               | 46(8.5%)      | 131(5.5%)        | 1.73(1.17,2.55)  | 0.006   | 1         | 1.72(1.10,2.68)               | 1.77(0.88,3.55)                |
| Thyroid                                              | gabapentin                  | 7(2.1%)       | 7(0.4%)          | 5.13(1.71,15.37) | 0.003   | 2         | 4.60(1.08,19.56)              | 5.93(1.12,31.26)               |
| Thyroid                                              | levothyroxine               | 33(9.7%)      | 79(4.9%)         | 2.18(1.37,3.48)  | 0.001   | 18        | 1.57(0.79,3.13)               | 2.87(1.57,5.24)                |
| Anal                                                 | clonidine                   | 9(3.2%)       | 13(1.0%)         | 3.87(1.52,9.85)  | 0.005   | 2         | 3.86(1.33,11.22)              | 3.89(0.57,26.72)               |
| Anal                                                 | doxazosin                   | 17(6.1%)      | 37(2.9%)         | 2.48(1.27,4.86)  | 0.008   | 11        | 1.68(0.62,4.57)               | 3.37(1.42,7.97)                |
| <b>Signals associated with decreased cancer risk</b> |                             |               |                  |                  |         |           |                               |                                |
| Breast §                                             | trazodone                   | 187(1.5%)     | 1,042(1.8%)      | 0.79(0.67,0.93)  | 0.005   | 3         | 0.80(0.64,0.99)               | 0.78(0.61,0.99)                |
| Lung                                                 | fluocinolone*               | 74(0.8%)      | 460(1.1%)        | 0.67(0.52,0.88)  | 0.003   | 2         | 0.70(0.51,0.98)               | 0.62(0.40,0.96)                |
| Lung                                                 | levodopa                    | 35(0.4%)      | 244(0.6%)        | 0.50(0.35,0.73)  | <0.001  | 19        | 0.66(0.41,1.05)               | 0.34(0.18,0.64)                |
| Lung                                                 | nitrofurantoin              | 110(1.2%)     | 555(1.3%)        | 0.74(0.60,0.93)  | 0.008   | 1         | 0.75(0.57,0.98)               | 0.73(0.51,1.06)                |
| Lung                                                 | progestogen-contraceptive § | 53(1.3%)      | 435(2.3%)        | 0.62(0.45,0.86)  | 0.004   | 4         | 0.70(0.48,1.03)               | 0.51(0.31,0.85)                |
| Lung                                                 | risperidone                 | 27(0.3%)      | 229(0.6%)        | 0.55(0.36,0.84)  | 0.005   | 9         | 0.59(0.34,1.02)               | 0.50(0.27,0.95)                |
| Colorectal                                           | levodopa                    | 40(0.5%)      | 242(0.6%)        | 0.60(0.43,0.85)  | 0.004   | 22        | 0.71(0.45,1.11)               | 0.49(0.29,0.84)                |
| Colorectal                                           | lofepramine                 | 74(0.9%)      | 421(1.1%)        | 0.71(0.55,0.92)  | 0.009   | 3         | 0.71(0.50,1.01)               | 0.71(0.48,1.03)                |
| Colorectal                                           | meloxicam                   | 141(1.6%)     | 781(2.1%)        | 0.76(0.63,0.92)  | 0.005   | 2         | 0.78(0.60,1.01)               | 0.74(0.57,0.97)                |
| Colorectal                                           | metoclopramide              | 235(2.7%)     | 1,256(3.3%)      | 0.78(0.68,0.91)  | 0.001   | 1         | 0.92(0.77,1.11)               | 0.60(0.47,0.77)                |
| Colorectal                                           | nitrofurantoin              | 91(1.0%)      | 482(1.3%)        | 0.71(0.56,0.91)  | 0.006   | 1         | 0.79(0.60,1.05)               | 0.58(0.39,0.88)                |
| Prostate §§                                          | levodopa                    | 42(0.6%)      | 248(0.8%)        | 0.47(0.30,0.72)  | 0.001   | 17        | 0.53(0.32,0.87)               | 0.39(0.21,0.73)                |
| Prostate §§                                          | risperidone                 | 12(0.2%)      | 122(0.4%)        | 0.37(0.20,0.70)  | 0.002   | 8         | 0.40(0.18,0.89)               | 0.35(0.13,0.91)                |
| Prostate §§                                          | senna                       | 301(4.0%)     | 1,378(4.3%)      | 0.76(0.66,0.87)  | <0.001  | 2         | 0.87(0.73,1.04)               | 0.63(0.51,0.78)                |
| Bladder                                              | iron                        | 196(6.1%)     | 855(6.1%)        | 0.77(0.64,0.91)  | 0.003   | 2         | 0.84(0.66,1.06)               | 0.70(0.55,0.89)                |
| Malignant melanoma                                   | dipyridamole                | 12(0.5%)      | 105(0.9%)        | 0.42(0.22,0.80)  | 0.008   | 13        | 0.51(0.23,1.13)               | 0.31(0.11,0.89)                |
| Malignant melanoma                                   | gliclazide                  | 30(1.2%)      | 200(1.8%)        | 0.51(0.32,0.80)  | 0.004   | 16        | 0.57(0.33,1.00)               | 0.44(0.23,0.85)                |
| Oesophagus                                           | estrogen-HRT §              | 70(9.0%)      | 509(15.2%)       | 0.59(0.43,0.79)  | <0.001  | 8         | 0.63(0.43,0.93)               | 0.54(0.36,0.81)                |
| Non-Hodgkin's lymphoma                               | progestogen-contraceptive § | 38(3.6%)      | 298(6.3%)        | 0.56(0.36,0.86)  | 0.008   | 4         | 0.64(0.39,1.05)               | 0.44(0.23,0.85)                |
| Oral (inc. Head,neck & nasal)                        | doxycycline                 | 32(2.2%)      | 269(4.0%)        | 0.45(0.30,0.66)  | <0.001  | 1         | 0.50(0.32,0.80)               | 0.33(0.15,0.70)                |
| Oral (inc. Head,neck & nasal)                        | ispaghula                   | 62(4.2%)      | 343(5.1%)        | 0.63(0.47,0.85)  | 0.002   | 2         | 0.72(0.49,1.07)               | 0.54(0.35,0.83)                |
| Ovary §                                              | loratadine                  | 46(3.2%)      | 300(4.6%)        | 0.64(0.46,0.89)  | 0.008   | 1         | 0.71(0.47,1.08)               | 0.55(0.32,0.93)                |
| Ovary §                                              | progestogen-contraceptive   | 50(3.5%)      | 414(6.4%)        | 0.55(0.39,0.78)  | 0.001   | 3         | 0.64(0.42,0.98)               | 0.45(0.27,0.74)                |
| Cervix & other gynae §                               | terbinafine                 | 4(0.4%)       | 96(2.0%)         | 0.18(0.07,0.49)  | 0.001   | 2         | 0.23(0.08,0.62)               | -                              |

**Table S1 (cont)**

| Cancer   | Medicine                  | No. (%) cases | No. (%) controls | OR (95%CI)      | p-value | Median †† | Low use v non-use: OR (95%CI) | High use v non-use: OR (95%CI) |
|----------|---------------------------|---------------|------------------|-----------------|---------|-----------|-------------------------------|--------------------------------|
| Uterus § | estrogen-HRT              | 169(16.7%)    | 1,102(23.4%)     | 0.73(0.60,0.89) | 0.002   | 7         | 0.76(0.59,0.98)               | 0.70(0.54,0.92)                |
| Uterus § | progestogen-contraceptive | 12(1.2%)      | 169(3.6%)        | 0.37(0.19,0.69) | 0.002   | 3         | 0.41(0.18,0.90)               | 0.32(0.12,0.82)                |
| Larynx   | doxazosin                 | 13(1.8%)      | 90(2.7%)         | 0.36(0.19,0.70) | 0.002   | 14        | 0.49(0.22,1.12)               | 0.24(0.09,0.69)                |
| Larynx   | terbinafine               | 7(0.9%)       | 96(2.9%)         | 0.32(0.14,0.75) | 0.009   | 2         | 0.44(0.18,1.06)               | -                              |

† comorbidities include diabetes, myocardial infarction, coronary heart disease, heart failure, peripheral vascular disease, dementia, cerebrovascular disease, chronic obstructive pulmonary disease, osteoporosis, rheumatological disease, renal disease, liver disease, irritable bowel disease, human immunodeficiency viruses and hemiplegia/paraplegia, plus potential site-specific confounders; OR odds ratio; CI confidence interval; CNS: central nervous system; medicines systemic unless otherwise indicated\* (local); HRT: hormone replacement therapy; § analyses restricted to females only; §§ analyses restricted to males only; low use: patient received more than 1 item of medicine and ≤median number of items; high use: patient received > median number of items of medicine; †† among control users; - no cases with prescription in category

**Table S2: Comorbidity<sup>†</sup> & smoking adjusted signals: exposure any prescription**

| Cancer                                               | Medicine                | No. (%) cases | No. (%) controls | OR (95%CI)      | p-value | Median †† | Low use v non-use: OR (95%CI) | High use v non-use: OR (95%CI) |
|------------------------------------------------------|-------------------------|---------------|------------------|-----------------|---------|-----------|-------------------------------|--------------------------------|
| <b>Signals associated with increased cancer risk</b> |                         |               |                  |                 |         |           |                               |                                |
| Breast §                                             | bisoprolol              | 272(2.8%)     | 908(2.0%)        | 1.30(1.11,1.51) | 0.001   | 12        | 1.28(1.03,1.58)               | 1.31(1.07,1.62)                |
| Breast §                                             | metronidazole*          | 176(1.8%)     | 676(1.5%)        | 1.26(1.06,1.51) | 0.010   | 1         | 1.25(1.00,1.56)               | 1.29(0.97,1.72)                |
| Breast §                                             | progestogen (HRT)       | 2,050(20.8%)  | 8,552(19.0%)     | 1.25(1.17,1.33) | <0.001  | 4         | 1.04(0.95,1.13)               | 1.48(1.37,1.61)                |
| Lung                                                 | amoxicillin             | 4,019(50.6%)  | 13,729(41.5%)    | 1.29(1.21,1.37) | <0.001  | 2         | 1.22(1.13,1.31)               | 1.45(1.33,1.58)                |
| Lung                                                 | azathioprine            | 59(0.7%)      | 144(0.4%)        | 1.76(1.21,2.57) | 0.003   | 11        | 1.10(0.61,1.99)               | 2.50(1.54,4.05)                |
| Lung                                                 | cimetidine              | 786(9.9%)     | 2,312(7.0%)      | 1.35(1.22,1.50) | <0.001  | 4         | 1.33(1.15,1.53)               | 1.38(1.20,1.59)                |
| Lung                                                 | ipratropium*            | 992(12.5%)    | 1,449(4.4%)      | 1.43(1.27,1.61) | <0.001  | 8         | 1.21(1.04,1.41)               | 1.69(1.45,1.97)                |
| Lung                                                 | nitrazepam              | 206(2.6%)     | 511(1.5%)        | 1.34(1.09,1.65) | 0.005   | 10        | 1.04(0.77,1.41)               | 1.66(1.27,2.19)                |
| Lung                                                 | salbutamol*             | 2,148(27.0%)  | 4,807(14.5%)     | 1.35(1.24,1.47) | <0.001  | 9         | 1.28(1.16,1.42)               | 1.44(1.29,1.60)                |
| Lung                                                 | salmeterol*             | 858(10.8%)    | 1,570(4.7%)      | 1.44(1.28,1.62) | <0.001  | 12        | 1.37(1.17,1.60)               | 1.52(1.31,1.78)                |
| Lung                                                 | tiotropium*             | 512(6.4%)     | 587(1.8%)        | 1.63(1.39,1.91) | <0.001  | 7         | 1.60(1.30,1.96)               | 1.66(1.34,2.06)                |
| Colorectal                                           | allopurinol             | 244(3.6%)     | 787(2.7%)        | 1.26(1.08,1.48) | 0.004   | 17        | 1.18(0.93,1.50)               | 1.33(1.08,1.64)                |
| Prostate §§                                          | alfuzosin               | 212(3.5%)     | 451(1.8%)        | 1.66(1.37,2.01) | <0.001  | 5         | 1.65(1.27,2.16)               | 1.67(1.28,2.18)                |
| Prostate §§                                          | clioquinol*             | 228(3.8%)     | 771(3.1%)        | 1.34(1.13,1.58) | 0.001   | 1         | 1.29(1.04,1.59)               | 1.42(1.09,1.85)                |
| Bladder                                              | cefalexin               | 331(12.7%)    | 994(9.3%)        | 1.37(1.17,1.60) | <0.001  | 1         | 1.36(1.12,1.65)               | 1.39(1.10,1.75)                |
| Bladder                                              | ciprofloxacin           | 260(10.0%)    | 784(7.3%)        | 1.40(1.18,1.65) | <0.001  | 1         | 1.35(1.11,1.66)               | 1.47(1.14,1.91)                |
| Bladder                                              | nicotine                | 147(5.6%)     | 354(3.3%)        | 1.54(1.23,1.94) | <0.001  | 2         | 1.29(0.97,1.70)               | 2.13(1.50,3.03)                |
| Bladder                                              | phenoxymethylpenicillin | 186(7.1%)     | 652(6.1%)        | 1.30(1.08,1.56) | 0.006   | 1         | 1.22(1.00,1.50)               | 1.65(1.12,2.42)                |
| Bladder                                              | quinine                 | 206(7.9%)     | 591(5.5%)        | 1.28(1.06,1.54) | 0.009   | 4         | 1.14(0.88,1.47)               | 1.44(1.12,1.86)                |
| Bladder                                              | ranitidine              | 392(15.0%)    | 1,252(11.7%)     | 1.26(1.10,1.44) | 0.001   | 6         | 1.20(1.00,1.44)               | 1.32(1.09,1.59)                |
| Bladder                                              | trimethoprim            | 506(19.4%)    | 1,246(11.6%)     | 1.92(1.68,2.20) | <0.001  | 1         | 1.78(1.51,2.09)               | 2.16(1.79,2.62)                |
| Malignant melanoma                                   | clopidogrel             | 51(2.7%)      | 153(1.8%)        | 1.63(1.13,2.36) | 0.009   | 6         | 1.36(0.80,2.33)               | 1.89(1.18,3.03)                |
| Oesophagus                                           | alginic acid            | 287(15.0%)    | 844(10.5%)       | 1.38(1.17,1.63) | <0.001  | 5         | 1.23(0.98,1.54)               | 1.57(1.25,1.96)                |
| Oesophagus                                           | azathioprine            | 20(1.0%)      | 30(0.4%)         | 3.39(1.79,6.42) | <0.001  | 9         | 2.69(1.12,6.47)               | 4.45(1.74,11.41)               |
| Oesophagus                                           | ipratropium*            | 125(6.6%)     | 305(3.8%)        | 1.45(1.11,1.89) | 0.006   | 8         | 1.40(1.00,1.95)               | 1.52(1.04,2.22)                |
| Oesophagus                                           | lansoprazole            | 323(16.9%)    | 1,069(13.3%)     | 1.33(1.14,1.55) | <0.001  | 4         | 1.08(0.87,1.34)               | 1.61(1.32,1.97)                |
| Oesophagus                                           | nystatin                | 83(4.4%)      | 213(2.7%)        | 1.65(1.23,2.20) | 0.001   | 1         | 1.51(1.06,2.16)               | 1.91(1.21,3.03)                |
| Oesophagus                                           | nystatin*               | 173(9.1%)     | 570(7.1%)        | 1.36(1.12,1.67) | 0.002   | 1         | 1.35(1.04,1.74)               | 1.39(1.03,1.87)                |
| Oesophagus                                           | omeprazole              | 426(22.3%)    | 1,428(17.8%)     | 1.29(1.12,1.48) | <0.001  | 6         | 1.14(0.95,1.37)               | 1.46(1.21,1.75)                |
| Non-Hodgkin's lymphoma                               | betamethasone*          | 307(18.9%)    | 1,057(15.0%)     | 1.26(1.08,1.48) | 0.004   | 1         | 1.24(1.01,1.52)               | 1.29(1.05,1.59)                |
| Non-Hodgkin's lymphoma                               | clobetasol*             | 51(3.1%)      | 132(1.9%)        | 1.72(1.20,2.46) | 0.003   | 1         | 1.63(0.99,2.69)               | 1.82(1.10,3.02)                |
| Non-Hodgkin's lymphoma                               | erythromycin            | 220(13.6%)    | 804(11.4%)       | 1.28(1.07,1.54) | 0.008   | 1         | 1.16(0.93,1.45)               | 1.50(1.15,1.97)                |
| Leukaemia                                            | oxybutynin              | 33(2.3%)      | 81(1.3%)         | 1.93(1.21,3.09) | 0.006   | 4         | 1.23(0.59,2.57)               | 2.74(1.47,5.10)                |

Table S2 (cont)

| Cancer                                               | Medicine            | No. (%) cases | No. (%) controls | OR (95%CI)       | p-value | Median †† | Low use v non-use: OR (95%CI) | High use v non-use: OR (95%CI) |
|------------------------------------------------------|---------------------|---------------|------------------|------------------|---------|-----------|-------------------------------|--------------------------------|
| Oral (inc. Head,neck & nasal)                        | clobetasone*        | 124(10.5%)    | 440(8.5%)        | 1.41(1.10,1.81)  | 0.007   | 1         | 1.14(0.83,1.57)               | 1.90(1.33,2.70)                |
| Oral (inc. Head,neck & nasal)                        | nystatin            | 61(5.2%)      | 129(2.5%)        | 1.92(1.33,2.77)  | 0.001   | 1         | 1.70(1.09,2.66)               | 2.44(1.32,4.51)                |
| Oral (inc. Head,neck & nasal)                        | vitamin B           | 191(16.2%)    | 260(5.0%)        | 2.33(1.82,3.00)  | <0.001  | 4         | 2.01(1.44,2.82)               | 2.72(1.93,3.84)                |
| Ovary §                                              | phenytoin           | 11(1.0%)      | 19(0.4%)         | 3.86(1.68,8.89)  | 0.002   | 27        | 3.21(1.02,10.08)              | 4.81(1.40,16.51)               |
| Stomach                                              | codeine             | 425(37.2%)    | 1,509(31.0%)     | 1.35(1.15,1.59)  | <0.001  | 3         | 1.34(1.11,1.63)               | 1.37(1.11,1.69)                |
| Stomach                                              | nicotines*          | 33(2.9%)      | 83(1.7%)         | 2.09(1.29,3.39)  | 0.003   | 1         | 1.95(1.06,3.56)               | 2.33(1.13,4.79)                |
| Stomach                                              | vitamin B           | 123(10.8%)    | 247(5.1%)        | 1.55(1.18,2.03)  | 0.002   | 5         | 1.45(1.02,2.07)               | 1.67(1.15,2.44)                |
| Kidney                                               | hydrochlorothiazide | 42(3.8%)      | 80(1.7%)         | 2.21(1.45,3.37)  | <0.001  | 13        | 1.82(1.02,3.25)               | 2.73(1.51,4.97)                |
| Kidney                                               | perindopril         | 62(5.6%)      | 122(2.6%)        | 1.76(1.21,2.54)  | 0.003   | 10        | 1.56(0.93,2.61)               | 1.97(1.20,3.25)                |
| Pancreas                                             | amoxicillin         | 429(47.5%)    | 1,561(41.3%)     | 1.31(1.09,1.56)  | 0.003   | 2         | 1.31(1.08,1.58)               | 1.31(1.00,1.71)                |
| Uterus §                                             | chlortalidone       | 32(3.8%)      | 68(1.8%)         | 2.14(1.32,3.49)  | 0.002   | 14        | 2.06(1.01,4.17)               | 2.22(1.18,4.16)                |
| Uterus §                                             | enalapril           | 57(6.8%)      | 129(3.3%)        | 2.00(1.38,2.92)  | <0.001  | 14        | 1.34(0.75,2.41)               | 2.67(1.65,4.31)                |
| Brain and CNS                                        | zinc oxide*         | 28(4.9%)      | 63(2.5%)         | 1.97(1.19,3.27)  | 0.008   | 1         | 1.95(1.01,3.77)               | 2.00(0.96,4.16)                |
| Larynx                                               | dextropropoxyphene  | 127(22.1%)    | 363(14.4%)       | 1.54(1.14,2.08)  | 0.004   | 4         | 1.44(0.96,2.16)               | 1.63(1.12,2.38)                |
| Larynx                                               | paracetamol         | 324(56.3%)    | 1,088(43.2%)     | 1.40(1.10,1.79)  | 0.007   | 5         | 1.39(1.05,1.84)               | 1.43(1.06,1.92)                |
| Larynx                                               | vitamin B           | 74(12.9%)     | 117(4.6%)        | 1.80(1.21,2.68)  | 0.004   | 6         | 1.74(1.05,2.90)               | 1.87(1.08,3.25)                |
| Myeloma                                              | amoxicillin         | 202(46.8%)    | 755(40.3%)       | 1.44(1.11,1.86)  | 0.006   | 2         | 1.36(1.02,1.80)               | 1.66(1.14,2.41)                |
| Myeloma                                              | clioquinol*         | 21(4.9%)      | 46(2.5%)         | 2.49(1.30,4.75)  | 0.006   | 1         | 2.19(0.96,4.98)               | 3.02(1.13,8.03)                |
| Myeloma                                              | paracetamol         | 245(56.7%)    | 877(46.8%)       | 1.51(1.16,1.96)  | 0.002   | 6         | 1.51(1.12,2.02)               | 1.51(1.09,2.09)                |
| Thyroid                                              | clarithromycin      | 31(11.4%)     | 98(7.8%)         | 2.10(1.28,3.46)  | 0.003   | 1         | 1.62(0.88,2.96)               | 3.49(1.63,7.49)                |
| Thyroid                                              | flucloxacillin      | 60(22.1%)     | 194(15.4%)       | 1.70(1.16,2.49)  | 0.006   | 1         | 1.60(1.03,2.50)               | 1.92(1.07,3.44)                |
| Thyroid                                              | folic acid§         | 13(6.5%)      | 34(3.6%)         | 2.77(1.32,5.82)  | 0.007   | 1         | 2.41(0.93,6.27)               | 3.41(1.08,10.83)               |
| Thyroid                                              | gabapentin          | 7(2.6%)       | 7(0.6%)          | 5.84(1.82,18.79) | 0.003   | 2         | 4.84(1.12,20.87)              | 8.16(1.14,58.61)               |
| Thyroid                                              | levothyroxine       | 28(10.3%)     | 64(5.1%)         | 2.21(1.27,3.83)  | 0.005   | 18        | 2.18(0.97,4.90)               | 2.23(1.12,4.44)                |
| Thyroid                                              | mefenamic acid      | 19(7.0%)      | 58(4.6%)         | 2.30(1.25,4.25)  | 0.008   | 1         | 1.81(0.86,3.80)               | 3.78(1.44,9.88)                |
| Anal                                                 | clonidine           | 8(3.5%)       | 11(1.1%)         | 4.49(1.61,12.50) | 0.004   | 2         | 3.97(1.26,12.54)              | 7.32(0.72,74.27)               |
| Anal                                                 | doxazosin           | 17(7.5%)      | 35(3.6%)         | 2.76(1.34,5.71)  | 0.006   | 11        | 1.99(0.65,6.11)               | 3.37(1.40,8.11)                |
| Anal                                                 | theophylline        | 6(2.6%)       | 7(0.7%)          | 9.08(1.78,46.43) | 0.008   | 10        | 9.04(0.65,126.55)             | 9.11(1.15,71.84)               |
| <b>Signals associated with decreased cancer risk</b> |                     |               |                  |                  |         |           |                               |                                |
| Breast §                                             | trazodone           | 159(1.6%)     | 949(2.1%)        | 0.74(0.62,0.89)  | 0.001   | 3         | 0.75(0.60,0.96)               | 0.72(0.55,0.95)                |
| Lung                                                 | fluocinolone*       | 67(0.8%)      | 406(1.2%)        | 0.65(0.48,0.89)  | 0.007   | 2         | 0.70(0.48,1.02)               | 0.58(0.34,0.98)                |
| Colorectal                                           | metoclopramide      | 210(3.1%)     | 1,106(3.8%)      | 0.77(0.65,0.91)  | 0.002   | 1         | 0.91(0.74,1.11)               | 0.58(0.44,0.76)                |
| Colorectal                                           | nitrofurantoin      | 76(1.1%)      | 430(1.5%)        | 0.66(0.51,0.87)  | 0.003   | 1         | 0.70(0.51,0.97)               | 0.59(0.38,0.94)                |
| Prostate §§                                          | levodopa            | 33(0.6%)      | 187(0.8%)        | 0.44(0.26,0.75)  | 0.003   | 17        | 0.50(0.27,0.92)               | 0.36(0.17,0.76)                |
| Prostate §§                                          | risperidone         | 9(0.2%)       | 92(0.4%)         | 0.38(0.18,0.78)  | 0.009   | 8         | 0.43(0.17,1.12)               | 0.32(0.11,0.97)                |
| Prostate §§                                          | senna               | 254(4.3%)     | 1,150(4.7%)      | 0.77(0.66,0.90)  | 0.001   | 2         | 0.91(0.75,1.10)               | 0.61(0.48,0.78)                |
| Bladder                                              | sotalol             | 5(0.2%)       | 82(0.8%)         | 0.19(0.07,0.52)  | 0.001   | 13        | 0.19(0.05,0.82)               | 0.18(0.04,0.78)                |
| Malignant melanoma                                   | gliclazide          | 26(1.4%)      | 184(2.2%)        | 0.49(0.30,0.80)  | 0.005   | 16        | 0.64(0.35,1.16)               | 0.34(0.16,0.72)                |

**Table S2 (cont)**

| Cancer                        | Medicine             | No. (%) cases | No. (%) controls | OR (95%CI)      | p-value | Median †† | Low use v non-use: OR (95%CI) | High use v non-use: OR (95%CI) |
|-------------------------------|----------------------|---------------|------------------|-----------------|---------|-----------|-------------------------------|--------------------------------|
| Oesophagus                    | diazepam             | 124(6.5%)     | 644(8.0%)        | 0.73(0.58,0.91) | 0.005   | 2         | 0.78(0.60,1.03)               | 0.64(0.45,0.91)                |
| Oesophagus                    | estrogen (HRT) §     | 63(10.4%)     | 463(17.9%)       | 0.61(0.44,0.84) | 0.003   | 8         | 0.62(0.41,0.95)               | 0.59(0.38,0.91)                |
| Non-Hodgkin's lymphoma        | progestogen (cont) § | 34(4.0%)      | 263(7.1%)        | 0.49(0.30,0.81) | 0.005   | 4         | 0.56(0.32,0.99)               | 0.39(0.19,0.82)                |
| Oral (inc. Head,neck & nasal) | doxycycline          | 28(2.4%)      | 243(4.7%)        | 0.43(0.28,0.67) | <0.001  | 1         | 0.49(0.29,0.81)               | 0.32(0.14,0.74)                |
| Ovary §                       | progestogen (cont)   | 46(4.1%)      | 368(7.2%)        | 0.56(0.38,0.81) | 0.003   | 3         | 0.63(0.39,1.01)               | 0.48(0.28,0.81)                |
| Cervix & other gynae §        | terbinafine          | 4(0.5%)       | 86(2.3%)         | 0.20(0.07,0.54) | 0.002   | 2         | 0.25(0.09,0.71)               | -                              |
| Uterus §                      | progestogen (cont)   | 12(1.4%)      | 158(4.1%)        | 0.37(0.19,0.71) | 0.003   | 3         | 0.41(0.18,0.94)               | 0.33(0.12,0.85)                |

† comorbidities include diabetes, myocardial infarction, coronary heart disease, heart failure, peripheral vascular disease, dementia, cerebrovascular disease, chronic obstructive pulmonary disease, osteoporosis, rheumatological disease, renal disease, liver disease, irritable bowel disease, human immunodeficiency viruses and hemiplegia/paraplegia, plus potential site-specific confounders; OR odds ratio; CI confidence interval; CNS: central nervous system; medicines systemic unless otherwise indicated\* (local); HRT: hormone replacement therapy; § analyses restricted to females only; §§ analyses restricted to males only; low use: patient received more than 1 item of medicine and ≤median number of items; high use: patient received > median number of items of medicine; †† among control users; - no cases with prescription in category



**Table S3: Comorbidity<sup>†</sup> adjusted signals: exposure >=6 prescriptions**

| Cancer                                               | Medicine           | No. (%) cases | No. (%) controls | OR (95%CI)      | p-value | Median †† | Low use v non-use: OR (95%CI) | High use v non-use: OR (95%CI) |
|------------------------------------------------------|--------------------|---------------|------------------|-----------------|---------|-----------|-------------------------------|--------------------------------|
| <b>Signals associated with increased cancer risk</b> |                    |               |                  |                 |         |           |                               |                                |
| Breast §                                             | estrogen-HRT       | 1,557(12.7%)  | 6,040(10.6%)     | 1.36(1.27,1.45) | <0.001  | 7         | 1.15(1.07,1.23)               | 1.41(1.30,1.52)                |
| Breast §                                             | metronidazole*     | 16(0.1%)      | 37(0.1%)         | 2.21(1.21,4.03) | 0.010   | 1         | 1.24(1.01,1.52)               | 1.29(0.98,1.69)                |
| Breast §                                             | progestogen-HRT    | 1,211(9.9%)   | 4,226(7.4%)      | 1.50(1.40,1.62) | <0.001  | 4         | 1.07(1.00,1.16)               | 1.51(1.40,1.62)                |
| Lung                                                 | amitriptyline      | 440(4.6%)     | 1,415(3.4%)      | 1.27(1.13,1.43) | <0.001  | 3         | 1.15(1.03,1.28)               | 1.28(1.14,1.43)                |
| Lung                                                 | amoxicillin        | 752(7.9%)     | 1,690(4.1%)      | 1.44(1.30,1.60) | <0.001  | 2         | 1.32(1.24,1.40)               | 1.62(1.50,1.75)                |
| Lung                                                 | azathioprine       | 50(0.5%)      | 105(0.3%)        | 1.88(1.30,2.70) | 0.001   | 11        | 1.08(0.66,1.75)               | 2.09(1.39,3.14)                |
| Lung                                                 | cimetidine         | 423(4.5%)     | 1,184(2.9%)      | 1.46(1.29,1.66) | <0.001  | 4         | 1.30(1.16,1.47)               | 1.48(1.31,1.66)                |
| Lung                                                 | diazepam           | 286(3.0%)     | 841(2.0%)        | 1.29(1.11,1.50) | 0.001   | 2         | 1.16(1.04,1.29)               | 1.22(1.08,1.39)                |
| Lung                                                 | dihydrocodeine     | 720(7.6%)     | 2,007(4.8%)      | 1.40(1.27,1.54) | <0.001  | 2         | 1.22(1.12,1.33)               | 1.37(1.25,1.49)                |
| Lung                                                 | folic acid §       | 139(3.3%)     | 361(1.9%)        | 1.50(1.21,1.86) | <0.001  | 6         | 1.37(1.11,1.70)               | 1.64(1.31,2.06)                |
| Lung                                                 | ipratropium*       | 713(7.5%)     | 942(2.3%)        | 1.63(1.45,1.84) | <0.001  | 8         | 1.40(1.23,1.59)               | 1.77(1.56,2.02)                |
| Lung                                                 | nitrazepam         | 157(1.7%)     | 360(0.9%)        | 1.49(1.21,1.84) | <0.001  | 10        | 1.17(0.91,1.50)               | 1.52(1.22,1.91)                |
| Lung                                                 | quinine            | 417(4.4%)     | 1,061(2.6%)      | 1.25(1.10,1.42) | 0.001   | 5         | 1.00(0.87,1.14)               | 1.25(1.10,1.42)                |
| Lung                                                 | salbutamol*        | 1,592(16.8%)  | 3,199(7.7%)      | 1.41(1.30,1.53) | <0.001  | 9         | 1.37(1.26,1.50)               | 1.52(1.39,1.66)                |
| Lung                                                 | salmeterol*        | 659(6.9%)     | 1,175(2.8%)      | 1.37(1.22,1.53) | <0.001  | 12        | 1.30(1.14,1.49)               | 1.37(1.20,1.57)                |
| Lung                                                 | temazepam          | 310(3.3%)     | 835(2.0%)        | 1.33(1.15,1.54) | <0.001  | 3         | 1.08(0.93,1.25)               | 1.33(1.16,1.53)                |
| Lung                                                 | tiotropium*        | 297(3.1%)     | 335(0.8%)        | 1.64(1.37,1.97) | <0.001  | 7         | 1.73(1.43,2.09)               | 1.78(1.46,2.16)                |
| Lung                                                 | vitamin D*         | 76(0.8%)      | 233(0.6%)        | 1.45(1.10,1.91) | 0.009   | 3         | 0.89(0.69,1.15)               | 1.39(1.09,1.77)                |
| Colorectal                                           | allopurinol        | 250(2.9%)     | 743(2.0%)        | 1.35(1.16,1.57) | <0.001  | 17        | 1.07(0.87,1.32)               | 1.48(1.23,1.78)                |
| Colorectal                                           | aminophylline      | 43(0.5%)      | 91(0.2%)         | 1.93(1.31,2.83) | 0.001   | 10        | 1.10(0.65,1.86)               | 1.91(1.24,2.95)                |
| Colorectal                                           | bisacodyl          | 46(0.5%)      | 96(0.3%)         | 1.79(1.24,2.59) | 0.002   | 2         | 0.84(0.59,1.19)               | 1.70(1.23,2.35)                |
| Colorectal                                           | dipyridamole       | 137(1.6%)     | 390(1.0%)        | 1.45(1.17,1.80) | 0.001   | 10        | 1.12(0.87,1.43)               | 1.41(1.11,1.80)                |
| Colorectal                                           | mesalazine         | 57(0.7%)      | 135(0.4%)        | 1.65(1.18,2.30) | 0.003   | 10        | 0.91(0.57,1.44)               | 1.80(1.24,2.60)                |
| Colorectal                                           | perindopril        | 186(2.1%)     | 588(1.6%)        | 1.31(1.10,1.56) | 0.003   | 11        | 1.17(0.95,1.45)               | 1.22(0.99,1.51)                |
| Colorectal                                           | phenytoin          | 46(0.5%)      | 147(0.4%)        | 1.58(1.12,2.22) | 0.009   | 25        | 1.16(0.72,1.85)               | 1.45(0.94,2.26)                |
| Prostate §§                                          | cerivastatin       | 60(0.8%)      | 166(0.5%)        | 1.59(1.16,2.20) | 0.004   | 8         | 1.17(0.80,1.73)               | 1.74(1.21,2.50)                |
| Prostate §§                                          | clioquinol*        | 24(0.3%)      | 58(0.2%)         | 2.06(1.24,3.42) | 0.005   | 1         | 1.23(1.01,1.49)               | 1.43(1.12,1.83)                |
| Bladder                                              | amoxicillin        | 153(4.7%)     | 448(3.2%)        | 1.39(1.13,1.72) | 0.002   | 2         | 1.15(1.04,1.27)               | 1.50(1.31,1.72)                |
| Bladder                                              | nicotine           | 17(0.5%)      | 30(0.2%)         | 2.59(1.38,4.85) | 0.003   | 2         | 1.76(1.35,2.28)               | 2.65(1.90,3.70)                |
| Bladder                                              | trimethoprim       | 49(1.5%)      | 116(0.8%)        | 1.80(1.25,2.58) | 0.001   | 1         | 1.81(1.56,2.09)               | 2.22(1.87,2.65)                |
| Malignant melanoma                                   | clopidogrel        | 34(1.4%)      | 85(0.8%)         | 1.86(1.21,2.88) | 0.005   | 6         | 1.31(0.79,2.18)               | 1.89(1.21,2.96)                |
| Oesophagus                                           | alginate acid      | 184(7.7%)     | 482(4.6%)        | 1.52(1.26,1.84) | <0.001  | 5         | 1.26(1.03,1.54)               | 1.56(1.29,1.89)                |
| Oesophagus                                           | beclometasone*     | 186(7.7%)     | 561(5.4%)        | 1.37(1.14,1.65) | 0.001   | 4         | 0.84(0.68,1.03)               | 1.29(1.07,1.55)                |
| Oesophagus                                           | cisapride          | 15(0.6%)      | 22(0.2%)         | 2.89(1.41,5.92) | 0.004   | 3         | 2.00(1.04,3.84)               | 2.07(1.06,4.03)                |
| Oesophagus                                           | lansoprazole       | 198(8.2%)     | 519(5.0%)        | 1.67(1.39,2.01) | <0.001  | 4         | 1.10(0.91,1.33)               | 1.65(1.38,1.98)                |
| Oesophagus                                           | omeprazole         | 276(11.5%)    | 812(7.8%)        | 1.45(1.24,1.69) | <0.001  | 6         | 1.26(1.06,1.48)               | 1.54(1.31,1.81)                |
| Oesophagus                                           | risedronate sodium | 16(0.7%)      | 31(0.3%)         | 2.54(1.27,5.05) | 0.008   | 7         | 0.66(0.24,1.81)               | 3.29(1.61,6.75)                |

**Table S3 (cont)**

| Cancer                        | Medicine                | No. (%) cases | No. (%) controls | OR (95%CI)       | p-value | Median †† | Low use v non-use: OR (95%CI) | High use v non-use: OR (95%CI) |
|-------------------------------|-------------------------|---------------|------------------|------------------|---------|-----------|-------------------------------|--------------------------------|
| Oesophagus                    | vitamin B               | 91(3.8%)      | 229(2.2%)        | 1.54(1.18,2.01)  | 0.001   | 5         | 1.20(0.92,1.56)               | 1.56(1.20,2.04)                |
| Oesophagus                    | warfarin                | 103(4.3%)     | 283(2.7%)        | 1.43(1.11,1.84)  | 0.005   | 13        | 0.95(0.69,1.31)               | 1.56(1.17,2.08)                |
| Non-Hodgkin's lymphoma        | amoxicillin             | 86(4.1%)      | 277(2.9%)        | 1.46(1.12,1.92)  | 0.006   | 2         | 1.28(1.13,1.45)               | 1.55(1.29,1.85)                |
| Non-Hodgkin's lymphoma        | azathioprine            | 19(0.9%)      | 27(0.3%)         | 2.58(1.31,5.08)  | 0.006   | 15        | 1.46(0.60,3.53)               | 2.87(1.31,6.29)                |
| Non-Hodgkin's lymphoma        | gabapentin              | 16(0.8%)      | 27(0.3%)         | 2.86(1.47,5.58)  | 0.002   | 3         | 0.82(0.36,1.87)               | 2.73(1.48,5.06)                |
| Non-Hodgkin's lymphoma        | methotrexate            | 14(0.7%)      | 18(0.2%)         | 3.41(1.57,7.41)  | 0.002   | 11        | 2.74(1.11,6.78)               | 3.12(1.28,7.56)                |
| Non-Hodgkin's lymphoma        | phenoxymethylpenicillin | 10(0.5%)      | 10(0.1%)         | 3.77(1.51,9.45)  | 0.005   | 1         | 1.20(0.96,1.48)               | 1.42(0.99,2.04)                |
| Leukaemia                     | allopurinol             | 64(3.2%)      | 166(1.9%)        | 1.68(1.24,2.27)  | 0.001   | 14        | 1.38(0.93,2.05)               | 1.75(1.22,2.52)                |
| Leukaemia                     | oxybutynin              | 25(1.3%)      | 46(0.5%)         | 2.35(1.41,3.92)  | 0.001   | 4         | 1.14(0.65,2.01)               | 2.19(1.33,3.61)                |
| Leukaemia                     | oxytetracycline         | 19(1.0%)      | 34(0.4%)         | 2.67(1.49,4.79)  | 0.001   | 1         | 1.10(0.78,1.56)               | 1.47(0.99,2.19)                |
| Leukaemia                     | paracetamol             | 459(23.0%)    | 1,605(18.2%)     | 1.26(1.10,1.44)  | 0.001   | 5         | 1.04(0.91,1.19)               | 1.27(1.10,1.47)                |
| Oral (inc. Head,neck & nasal) | betamethasone*          | 42(2.9%)      | 116(1.7%)        | 1.69(1.15,2.48)  | 0.007   | 1         | 1.02(0.81,1.29)               | 1.37(1.09,1.72)                |
| Oral (inc. Head,neck & nasal) | folic acid §            | 31(6.7%)      | 32(1.5%)         | 3.79(2.09,6.89)  | <0.001  | 4         | 1.50(0.79,2.82)               | 4.03(2.27,7.17)                |
| Oral (inc. Head,neck & nasal) | vitamin A               | 15(1.0%)      | 12(0.2%)         | 3.84(1.68,8.79)  | 0.001   | 1         | 1.07(0.49,2.33)               | 2.28(1.21,4.28)                |
| Oral (inc. Head,neck & nasal) | vitamin B               | 121(8.2%)     | 132(2.0%)        | 3.09(2.31,4.14)  | <0.001  | 4         | 2.31(1.72,3.11)               | 3.23(2.43,4.29)                |
| Oral (inc. Head,neck & nasal) | vitamin C               | 18(1.2%)      | 14(0.2%)         | 4.43(2.05,9.56)  | <0.001  | 2         | 1.21(0.62,2.34)               | 2.54(1.31,4.92)                |
| Stomach                       | cimetidine              | 63(4.4%)      | 180(2.9%)        | 1.52(1.11,2.07)  | 0.008   | 4         | 1.32(0.98,1.79)               | 1.56(1.15,2.11)                |
| Ovary §                       | cyclopenthiiazide       | 13(0.9%)      | 17(0.3%)         | 3.31(1.54,7.15)  | 0.002   | 12        | 1.91(0.69,5.33)               | 3.26(1.20,8.88)                |
| Ovary §                       | phenytoin               | 13(0.9%)      | 19(0.3%)         | 3.87(1.83,8.18)  | <0.001  | 27        | 2.48(0.97,6.31)               | 4.67(1.62,13.46)               |
| Ovary §                       | vitamin D*              | 13(0.9%)      | 24(0.4%)         | 2.66(1.30,5.45)  | 0.007   | 2         | 0.87(0.42,1.82)               | 2.53(1.44,4.44)                |
| Kidney                        | hydrochlorothiazide     | 39(2.9%)      | 70(1.2%)         | 2.26(1.46,3.48)  | <0.001  | 13        | 1.50(0.86,2.62)               | 2.50(1.45,4.31)                |
| Kidney                        | nystatin*               | 19(1.4%)      | 34(0.6%)         | 2.25(1.23,4.13)  | 0.009   | 1         | 0.90(0.66,1.24)               | 1.22(0.84,1.78)                |
| Kidney                        | perindopril             | 45(3.3%)      | 84(1.4%)         | 1.87(1.25,2.81)  | 0.003   | 10        | 1.46(0.92,2.32)               | 1.85(1.15,2.97)                |
| Pancreas                      | clopidogrel             | 35(3.3%)      | 66(1.4%)         | 2.14(1.34,3.42)  | 0.001   | 7         | 1.05(0.60,1.83)               | 2.22(1.35,3.66)                |
| Pancreas                      | hydrochlorothiazide     | 31(2.9%)      | 79(1.7%)         | 1.84(1.16,2.90)  | 0.009   | 15        | 1.26(0.69,2.31)               | 1.78(1.01,3.15)                |
| Pancreas                      | metoclopramide          | 12(1.1%)      | 16(0.3%)         | 3.08(1.40,6.76)  | 0.005   | 1         | 1.01(0.62,1.64)               | 1.85(1.14,3.03)                |
| Pancreas                      | nicotine                | 11(1.0%)      | 13(0.3%)         | 3.61(1.55,8.43)  | 0.003   | 2         | 1.91(1.24,2.94)               | 1.97(1.18,3.28)                |
| Cervix & other gynae §        | cimetidine              | 28(2.7%)      | 68(1.4%)         | 1.87(1.17,2.98)  | 0.009   | 3         | 1.33(0.89,2.00)               | 1.61(1.05,2.48)                |
| Uterus §                      | atenolol                | 186(18.4%)    | 610(13.0%)       | 1.40(1.14,1.71)  | 0.001   | 17        | 1.26(0.99,1.60)               | 1.54(1.21,1.96)                |
| Uterus §                      | bendroflumethiazide     | 212(21.0%)    | 756(16.1%)       | 1.33(1.10,1.61)  | 0.003   | 14        | 1.08(0.86,1.34)               | 1.53(1.22,1.90)                |
| Uterus §                      | bismuth*                | 5(0.5%)       | 4(0.1%)          | 6.56(1.64,26.17) | 0.008   | 1         | 0.65(0.36,1.17)               | 2.37(1.16,4.83)                |
| Uterus §                      | dextropropoxyphene      | 103(10.2%)    | 341(7.3%)        | 1.43(1.11,1.83)  | 0.005   | 3         | 1.04(0.81,1.34)               | 1.23(0.96,1.58)                |
| Uterus §                      | doxazosin               | 35(3.5%)      | 72(1.5%)         | 2.21(1.43,3.43)  | <0.001  | 9         | 1.24(0.73,2.13)               | 2.23(1.37,3.64)                |
| Uterus §                      | enalapril               | 45(4.5%)      | 108(2.3%)        | 1.78(1.21,2.62)  | 0.003   | 14        | 1.16(0.69,1.94)               | 2.23(1.43,3.47)                |
| Uterus §                      | losartan potassium      | 28(2.8%)      | 66(1.4%)         | 2.00(1.24,3.23)  | 0.005   | 13        | 1.26(0.68,2.35)               | 2.05(1.17,3.62)                |
| Uterus §                      | peru balsam*            | 5(0.5%)       | 4(0.1%)          | 6.56(1.64,26.17) | 0.008   | 1         | 0.60(0.33,1.10)               | 2.36(1.16,4.82)                |
| Uterus §                      | salicylic acid*         | 7(0.7%)       | 9(0.2%)          | 4.31(1.53,12.08) | 0.006   | 1         | 0.75(0.41,1.38)               | 1.83(1.02,3.27)                |
| Larynx                        | cimetidine              | 38(5.1%)      | 79(2.4%)         | 2.12(1.36,3.32)  | 0.001   | 4         | 0.71(0.42,1.20)               | 1.97(1.27,3.05)                |

**Table S3 (cont)**

| Cancer                                               | Medicine          | No. (%) cases | No. (%) controls | OR (95%CI)       | p-value | Median †† | Low use v non-use: OR (95%CI) | High use v non-use: OR (95%CI) |
|------------------------------------------------------|-------------------|---------------|------------------|------------------|---------|-----------|-------------------------------|--------------------------------|
| Larynx                                               | vitamin B         | 45(6.1%)      | 71(2.1%)         | 2.20(1.41,3.41)  | <0.001  | 6         | 2.19(1.40,3.40)               | 2.66(1.68,4.21)                |
| Brain and CNS                                        | carbamazepine     | 16(2.2%)      | 31(0.9%)         | 3.02(1.59,5.71)  | 0.001   | 6         | 1.43(0.69,2.97)               | 3.37(1.72,6.62)                |
| Myeloma                                              | mometasone*       | 9(1.7%)       | 14(0.6%)         | 3.45(1.40,8.50)  | 0.007   | 1         | 1.25(0.71,2.21)               | 1.78(1.01,3.15)                |
| Liver                                                | furosemide        | 96(18.2%)     | 166(7.1%)        | 1.98(1.35,2.91)  | 0.001   | 12        | 1.14(0.73,1.78)               | 1.89(1.22,2.94)                |
| Liver                                                | mometasone*       | 10(1.9%)      | 22(0.9%)         | 3.82(1.42,10.26) | 0.008   | 1         | 1.15(0.59,2.26)               | 1.75(0.88,3.44)                |
| Liver                                                | pravastatin       | 24(4.5%)      | 47(2.0%)         | 2.26(1.24,4.11)  | 0.008   | 12        | 1.15(0.45,2.97)               | 2.66(1.31,5.38)                |
| Thyroid                                              | levothyroxine     | 30(8.8%)      | 69(4.3%)         | 2.30(1.40,3.76)  | 0.001   | 18        | 1.57(0.79,3.13)               | 2.87(1.57,5.24)                |
| Thyroid                                              | progestogen-HRT § | 18(7.1%)      | 47(3.9%)         | 2.52(1.33,4.78)  | 0.005   | 3         | 1.18(0.70,2.00)               | 2.19(1.22,3.94)                |
| Anal                                                 | doxazosin         | 13(4.7%)      | 23(1.8%)         | 3.19(1.44,7.06)  | 0.004   | 11        | 1.68(0.62,4.57)               | 3.37(1.42,7.97)                |
| Anal                                                 | nicotine          | 5(1.8%)       | 3(0.2%)          | 9.95(2.22,44.53) | 0.003   | 2         | 1.21(0.54,2.70)               | 2.74(1.11,6.75)                |
| <b>Signals associated with decreased cancer risk</b> |                   |               |                  |                  |         |           |                               |                                |
| Breast §                                             | carbamazepine     | 78(0.6%)      | 494(0.9%)        | 0.70(0.55,0.90)  | 0.005   | 5         | 1.11(0.91,1.35)               | 0.70(0.55,0.90)                |
| Breast §                                             | iron              | 204(1.7%)     | 1,024(1.8%)      | 0.78(0.67,0.92)  | 0.003   | 2         | 0.96(0.87,1.06)               | 0.84(0.74,0.94)                |
| Breast §                                             | prednisolone      | 176(1.4%)     | 1,008(1.8%)      | 0.78(0.66,0.92)  | 0.004   | 2         | 1.02(0.92,1.13)               | 0.85(0.75,0.97)                |
| Breast §                                             | trimethoprim      | 91(0.7%)      | 541(0.9%)        | 0.72(0.57,0.91)  | 0.005   | 1         | 1.03(0.96,1.11)               | 0.94(0.85,1.02)                |
| Lung                                                 | benzalkonium*     | 18(0.2%)      | 118(0.3%)        | 0.49(0.29,0.83)  | 0.008   | 1         | 1.20(0.98,1.48)               | 0.71(0.54,0.94)                |
| Lung                                                 | dimeticone*       | 17(0.2%)      | 119(0.3%)        | 0.46(0.27,0.80)  | 0.005   | 1         | 1.15(0.93,1.42)               | 0.75(0.57,0.98)                |
| Lung                                                 | levodopa          | 21(0.2%)      | 193(0.5%)        | 0.38(0.24,0.61)  | <0.001  | 19        | 0.66(0.41,1.05)               | 0.34(0.18,0.64)                |
| Colorectal                                           | diclofenac        | 336(3.9%)     | 1,986(5.2%)      | 0.71(0.63,0.80)  | <0.001  | 2         | 0.97(0.90,1.06)               | 0.84(0.76,0.92)                |
| Colorectal                                           | lactulose         | 263(3.0%)     | 1,179(3.1%)      | 0.78(0.68,0.90)  | 0.001   | 3         | 1.03(0.92,1.15)               | 0.81(0.71,0.92)                |
| Colorectal                                           | misoprostol       | 77(0.9%)      | 453(1.2%)        | 0.69(0.53,0.88)  | 0.003   | 2         | 0.84(0.70,1.00)               | 0.81(0.67,0.98)                |
| Colorectal                                           | naproxen          | 97(1.1%)      | 572(1.5%)        | 0.72(0.57,0.89)  | 0.003   | 2         | 0.89(0.76,1.03)               | 0.78(0.66,0.94)                |
| Colorectal                                           | senna             | 126(1.5%)     | 591(1.6%)        | 0.73(0.60,0.90)  | 0.003   | 2         | 0.97(0.83,1.13)               | 0.72(0.61,0.86)                |
| Prostate §§                                          | benzalkonium*     | 8(0.1%)       | 77(0.2%)         | 0.36(0.17,0.77)  | 0.009   | 1         | 0.95(0.72,1.25)               | 0.75(0.53,1.07)                |
| Prostate §§                                          | bumetanide        | 32(0.4%)      | 201(0.6%)        | 0.57(0.38,0.86)  | 0.007   | 12        | 1.05(0.71,1.56)               | 0.43(0.26,0.73)                |
| Prostate §§                                          | citalopram        | 49(0.7%)      | 352(1.1%)        | 0.59(0.43,0.81)  | 0.001   | 5         | 1.03(0.81,1.30)               | 0.59(0.43,0.81)                |
| Prostate §§                                          | dimeticone*       | 8(0.1%)       | 79(0.2%)         | 0.36(0.17,0.77)  | 0.009   | 1         | 0.97(0.73,1.28)               | 0.72(0.50,1.02)                |
| Prostate §§                                          | furosemide        | 435(5.8%)     | 2,181(6.8%)      | 0.70(0.61,0.79)  | <0.001  | 12        | 0.91(0.80,1.03)               | 0.69(0.59,0.79)                |
| Prostate §§                                          | iron              | 92(1.2%)      | 424(1.3%)        | 0.72(0.57,0.92)  | 0.008   | 3         | 1.08(0.92,1.27)               | 0.72(0.58,0.89)                |
| Prostate §§                                          | lactulose         | 172(2.3%)     | 819(2.6%)        | 0.68(0.57,0.81)  | <0.001  | 2         | 0.93(0.81,1.06)               | 0.70(0.60,0.82)                |
| Prostate §§                                          | lidocaine*        | 8(0.1%)       | 68(0.2%)         | 0.35(0.16,0.75)  | 0.007   | 1         | 1.15(0.86,1.55)               | 0.69(0.47,1.00)                |
| Prostate §§                                          | risperidone       | 5(0.1%)       | 67(0.2%)         | 0.27(0.11,0.70)  | 0.007   | 8         | 0.40(0.18,0.89)               | 0.35(0.13,0.91)                |
| Prostate §§                                          | senna             | 84(1.1%)      | 415(1.3%)        | 0.70(0.55,0.90)  | 0.005   | 2         | 0.87(0.73,1.04)               | 0.63(0.51,0.78)                |
| Prostate §§                                          | vitamin D         | 69(0.9%)      | 378(1.2%)        | 0.66(0.50,0.88)  | 0.004   | 6         | 1.02(0.80,1.30)               | 0.69(0.52,0.93)                |
| Bladder                                              | iron              | 55(1.7%)      | 263(1.9%)        | 0.64(0.47,0.88)  | 0.006   | 2         | 0.84(0.66,1.06)               | 0.70(0.55,0.89)                |
| Bladder                                              | lactulose         | 108(3.3%)     | 465(3.3%)        | 0.73(0.58,0.91)  | 0.006   | 2         | 1.01(0.84,1.21)               | 0.83(0.69,1.01)                |

**Table S3 (cont)**

| Cancer                        | Medicine                         | No. (%) cases | No. (%) controls | OR (95%CI)      | p-value | Median †† | Low use v non-use: OR (95%CI) | High use v non-use: OR (95%CI) |
|-------------------------------|----------------------------------|---------------|------------------|-----------------|---------|-----------|-------------------------------|--------------------------------|
| <b>Malignant melanoma</b>     | <b>gliclazide</b>                | 22(0.9%)      | 153(1.4%)        | 0.51(0.31,0.84) | 0.009   | 16        | 0.57(0.33,1.00)               | 0.44(0.23,0.85)                |
| <b>Non-Hodgkin's lymphoma</b> | <b>vitamin B</b>                 | 29(1.4%)      | 179(1.9%)        | 0.51(0.34,0.78) | 0.002   | 5         | 1.06(0.78,1.43)               | 0.52(0.34,0.79)                |
| <b>Stomach</b>                | <b>finasteride §§</b>            | 11(1.3%)      | 89(2.5%)         | 0.41(0.21,0.81) | 0.010   | 10        | 0.74(0.40,1.36)               | 0.36(0.16,0.80)                |
| <b>Ovary §</b>                | <b>nifedipine</b>                | 32(2.3%)      | 216(3.3%)        | 0.56(0.38,0.83) | 0.004   | 11        | 0.71(0.48,1.07)               | 0.64(0.41,0.99)                |
| <b>Ovary §</b>                | <b>progestogen-contraceptive</b> | 13(0.9%)      | 140(2.1%)        | 0.44(0.23,0.81) | 0.009   | 3         | 0.64(0.42,0.98)               | 0.45(0.27,0.74)                |
| <b>Uterus §</b>               | <b>estrogen-HRT</b>              | 93(9.2%)      | 650(13.8%)       | 0.68(0.53,0.87) | 0.002   | 7         | 0.76(0.59,0.98)               | 0.70(0.54,0.92)                |
| <b>Larynx</b>                 | <b>diclofenac</b>                | 20(2.7%)      | 153(4.6%)        | 0.48(0.29,0.78) | 0.003   | 2         | 1.12(0.84,1.49)               | 0.71(0.50,1.00)                |
| <b>Larynx</b>                 | <b>doxazosin</b>                 | 8(1.1%)       | 63(1.9%)         | 0.31(0.14,0.71) | 0.006   | 14        | 0.49(0.22,1.12)               | 0.24(0.09,0.69)                |

† comorbidities include diabetes, myocardial infarction, coronary heart disease, heart failure, peripheral vascular disease, dementia, cerebrovascular disease, chronic obstructive pulmonary disease, osteoporosis, rheumatological disease, renal disease, liver disease, irritable bowel disease, human immunodeficiency viruses and hemiplegia/paraplegia, plus potential site-specific confounders; OR odds ratio; CI confidence interval; CNS: central nervous system; medicines systemic unless otherwise indicated\* (local); HRT: hormone replacement therapy; § analyses restricted to females only; §§ analyses restricted to males only; low use: patient received more than 1 item of medicine and ≤median number of items; high use: patient received > median number of items of medicine; †† among control users; - no cases with ≥6 prescriptions in category

**Table S4: Comorbidity<sup>†</sup> & smoking adjusted signals: exposure  $\geq$ 6 prescriptions**

| Cancer                                               | Medicine                | No. (%) cases | No. (%) controls | OR (95%CI)      | p-value | Median †† | Low use v non-use: OR (95%CI) | High use v non-use: OR (95%CI) |
|------------------------------------------------------|-------------------------|---------------|------------------|-----------------|---------|-----------|-------------------------------|--------------------------------|
| <b>Signals associated with increased cancer risk</b> |                         |               |                  |                 |         |           |                               |                                |
| Breast §                                             | estrogen (HRT)          | 1,368(13.9%)  | 5,344(11.9%)     | 1.32(1.23,1.43) | <0.001  | 7         | 1.13(1.05,1.23)               | 1.38(1.27,1.50)                |
| Breast §                                             | metronidazole*          | 15(0.2%)      | 32(0.1%)         | 2.36(1.25,4.46) | 0.008   | 1         | 1.25(1.00,1.56)               | 1.29(0.97,1.72)                |
| Breast §                                             | progestogen (HRT)       | 1,074(10.9%)  | 3,755(8.4%)      | 1.48(1.37,1.61) | <0.001  | 4         | 1.04(0.95,1.13)               | 1.48(1.37,1.61)                |
| Lung                                                 | amitriptyline           | 418(5.3%)     | 1,261(3.8%)      | 1.25(1.09,1.44) | 0.001   | 3         | 1.14(1.01,1.29)               | 1.25(1.10,1.42)                |
| Lung                                                 | amoxicillin             | 722(9.1%)     | 1,632(4.9%)      | 1.36(1.21,1.53) | <0.001  | 2         | 1.22(1.13,1.31)               | 1.45(1.33,1.58)                |
| Lung                                                 | azathioprine            | 45(0.6%)      | 92(0.3%)         | 2.30(1.49,3.56) | <0.001  | 11        | 1.10(0.61,1.99)               | 2.50(1.54,4.05)                |
| Lung                                                 | cimetidine              | 376(4.7%)     | 1,005(3.0%)      | 1.37(1.18,1.58) | <0.001  | 4         | 1.33(1.15,1.53)               | 1.38(1.20,1.59)                |
| Lung                                                 | dihydrocodeine          | 653(8.2%)     | 1,791(5.4%)      | 1.28(1.15,1.44) | <0.001  | 2         | 1.10(1.00,1.22)               | 1.20(1.09,1.33)                |
| Lung                                                 | fluticasone*            | 552(6.9%)     | 1,216(3.7%)      | 1.41(1.24,1.61) | <0.001  | 5         | 1.04(0.90,1.21)               | 1.42(1.24,1.62)                |
| Lung                                                 | ipratropium*            | 661(8.3%)     | 816(2.5%)        | 1.56(1.35,1.79) | <0.001  | 8         | 1.21(1.04,1.41)               | 1.69(1.45,1.97)                |
| Lung                                                 | nitrazepam              | 139(1.7%)     | 284(0.9%)        | 1.58(1.22,2.05) | 0.001   | 10        | 1.04(0.77,1.41)               | 1.66(1.27,2.19)                |
| Lung                                                 | phenoxymethylpenicillin | 21(0.3%)      | 44(0.1%)         | 2.89(1.52,5.50) | 0.001   | 1         | 0.99(0.87,1.13)               | 1.23(0.99,1.54)                |
| Lung                                                 | quinine                 | 369(4.6%)     | 916(2.8%)        | 1.31(1.13,1.52) | <0.001  | 5         | 0.96(0.82,1.13)               | 1.30(1.12,1.52)                |
| Lung                                                 | salbutamol*             | 1,453(18.3%)  | 2,854(8.6%)      | 1.36(1.24,1.50) | <0.001  | 9         | 1.28(1.16,1.42)               | 1.44(1.29,1.60)                |
| Lung                                                 | salmeterol*             | 630(7.9%)     | 1,104(3.3%)      | 1.51(1.32,1.72) | <0.001  | 12        | 1.37(1.17,1.60)               | 1.52(1.31,1.78)                |
| Lung                                                 | tiotropium*             | 297(3.7%)     | 333(1.0%)        | 1.52(1.25,1.85) | <0.001  | 7         | 1.60(1.30,1.96)               | 1.66(1.34,2.06)                |
| Colorectal                                           | allopurinol             | 208(3.1%)     | 628(2.2%)        | 1.33(1.12,1.59) | 0.001   | 17        | 1.18(0.93,1.50)               | 1.33(1.08,1.64)                |
| Colorectal                                           | aminophylline           | 30(0.4%)      | 72(0.2%)         | 1.89(1.17,3.05) | 0.009   | 10        | 1.26(0.67,2.36)               | 1.75(1.03,2.96)                |
| Colorectal                                           | dipyridamole            | 116(1.7%)     | 336(1.2%)        | 1.44(1.13,1.83) | 0.004   | 10        | 1.10(0.82,1.46)               | 1.40(1.06,1.83)                |
| Colorectal                                           | tiotropium*             | 77(1.1%)      | 251(0.9%)        | 1.49(1.11,1.99) | 0.007   | 7         | 1.24(0.90,1.71)               | 1.37(0.99,1.90)                |
| Prostate §§                                          | alfuzosin               | 103(1.7%)     | 222(0.9%)        | 1.63(1.25,2.13) | <0.001  | 5         | 1.65(1.27,2.16)               | 1.67(1.28,2.18)                |
| Prostate §§                                          | atorvastatin            | 452(7.6%)     | 1,783(7.3%)      | 1.25(1.11,1.42) | <0.001  | 17        | 1.15(0.98,1.33)               | 1.30(1.12,1.52)                |
| Prostate §§                                          | clioquinol*             | 22(0.4%)      | 48(0.2%)         | 2.09(1.19,3.66) | 0.010   | 1         | 1.29(1.04,1.59)               | 1.42(1.09,1.85)                |
| Bladder                                              | amoxicillin             | 146(5.6%)     | 424(4.0%)        | 1.45(1.16,1.81) | 0.001   | 2         | 1.09(0.97,1.22)               | 1.39(1.20,1.61)                |
| Bladder                                              | cefalexin               | 30(1.2%)      | 61(0.6%)         | 1.99(1.23,3.20) | 0.005   | 1         | 1.36(1.12,1.65)               | 1.39(1.10,1.75)                |
| Bladder                                              | celecoxib               | 41(1.6%)      | 115(1.1%)        | 1.78(1.20,2.63) | 0.004   | 2         | 1.18(0.88,1.58)               | 1.53(1.11,2.10)                |
| Bladder                                              | ranitidine              | 204(7.8%)     | 601(5.6%)        | 1.28(1.07,1.54) | 0.008   | 6         | 1.20(1.00,1.44)               | 1.32(1.09,1.59)                |
| Bladder                                              | trimethoprim            | 48(1.8%)      | 102(1.0%)        | 2.04(1.39,3.00) | <0.001  | 1         | 1.78(1.51,2.09)               | 2.16(1.79,2.62)                |
| Oesophagus                                           | alginic acid            | 152(8.0%)     | 402(5.0%)        | 1.53(1.22,1.91) | <0.001  | 5         | 1.23(0.98,1.54)               | 1.57(1.25,1.96)                |
| Oesophagus                                           | azathioprine            | 14(0.7%)      | 18(0.2%)         | 4.15(1.87,9.22) | <0.001  | 9         | 2.69(1.12,6.47)               | 4.45(1.74,11.41)               |
| Oesophagus                                           | lansoprazole            | 178(9.3%)     | 472(5.9%)        | 1.59(1.30,1.95) | <0.001  | 4         | 1.08(0.87,1.34)               | 1.61(1.32,1.97)                |
| Oesophagus                                           | omeprazole              | 242(12.7%)    | 719(9.0%)        | 1.40(1.17,1.66) | <0.001  | 6         | 1.14(0.95,1.37)               | 1.46(1.21,1.75)                |
| Oesophagus                                           | prednisolone            | 66(3.5%)      | 164(2.0%)        | 1.68(1.19,2.38) | 0.003   | 2         | 1.09(0.84,1.42)               | 1.52(1.15,2.01)                |
| Oesophagus                                           | risedronate sodium      | 15(0.8%)      | 29(0.4%)         | 2.69(1.28,5.67) | 0.009   | 7         | 0.45(0.13,1.58)               | 3.71(1.70,8.10)                |
| Non-Hodgkin's lymphoma                               | amoxicillin             | 83(5.1%)      | 262(3.7%)        | 1.50(1.13,2.00) | 0.006   | 2         | 1.18(1.02,1.36)               | 1.43(1.18,1.74)                |
| Non-Hodgkin's lymphoma                               | gabapentin              | 15(0.9%)      | 27(0.4%)         | 3.41(1.67,6.96) | 0.001   | 3         | 0.95(0.41,2.19)               | 3.08(1.61,5.91)                |

**Table S4 (cont)**

| Cancer                                               | Medicine            | No. (%) cases | No. (%) controls | OR (95%CI)       | p-value | Median †† | Low use v non-use: OR (95%CI) | High use v non-use: OR (95%CI) |
|------------------------------------------------------|---------------------|---------------|------------------|------------------|---------|-----------|-------------------------------|--------------------------------|
| Leukaemia                                            | metoclopramide      | 16(1.1%)      | 34(0.5%)         | 2.61(1.34,5.11)  | 0.005   | 1         | 0.42(0.24,0.73)               | 1.13(0.69,1.85)                |
| Leukaemia                                            | oxybutynin          | 21(1.5%)      | 37(0.6%)         | 2.69(1.42,5.08)  | 0.002   | 4         | 1.23(0.59,2.57)               | 2.74(1.47,5.10)                |
| Leukaemia                                            | oxytetracycline     | 15(1.0%)      | 26(0.4%)         | 3.01(1.49,6.07)  | 0.002   | 1         | 1.29(0.87,1.92)               | 1.52(0.96,2.39)                |
| Leukaemia                                            | paracetamol         | 382(26.4%)    | 1,298(20.9%)     | 1.34(1.14,1.57)  | <0.001  | 5         | 1.06(0.90,1.25)               | 1.37(1.15,1.63)                |
| Oral (inc. Head,neck & nasal)                        | hydrochlorothiazide | 17(1.4%)      | 44(0.9%)         | 2.56(1.34,4.89)  | 0.005   | 8         | 0.82(0.26,2.62)               | 3.34(1.68,6.64)                |
| Oral (inc. Head,neck & nasal)                        | hydrocortisone*     | 60(5.1%)      | 172(3.3%)        | 1.66(1.17,2.35)  | 0.004   | 2         | 0.92(0.76,1.13)               | 1.18(0.91,1.53)                |
| Oral (inc. Head,neck & nasal)                        | vitamin B           | 104(8.8%)     | 107(2.1%)        | 2.55(1.79,3.63)  | <0.001  | 4         | 2.01(1.44,2.82)               | 2.72(1.93,3.84)                |
| Oral (inc. Head,neck & nasal)                        | vitamin C           | 15(1.3%)      | 11(0.2%)         | 3.63(1.42,9.25)  | 0.007   | 2         | 0.92(0.46,1.85)               | 2.49(1.09,5.70)                |
| Ovary §                                              | phenytoin           | 10(0.9%)      | 15(0.3%)         | 4.31(1.74,10.65) | 0.002   | 27        | 3.21(1.02,10.08)              | 4.81(1.40,16.51)               |
| Stomach                                              | chlorphenamine      | 10(0.9%)      | 10(0.2%)         | 4.72(1.64,13.56) | 0.004   | 1         | 1.32(0.83,2.12)               | 1.45(0.78,2.70)                |
| Kidney                                               | hydrochlorothiazide | 37(3.3%)      | 62(1.3%)         | 2.61(1.63,4.18)  | <0.001  | 13        | 1.82(1.02,3.25)               | 2.73(1.51,4.97)                |
| Kidney                                               | perindopril         | 44(4.0%)      | 81(1.7%)         | 1.94(1.25,2.99)  | 0.003   | 10        | 1.56(0.93,2.61)               | 1.97(1.20,3.25)                |
| Pancreas                                             | clopidogrel         | 35(3.9%)      | 63(1.7%)         | 2.37(1.45,3.86)  | 0.001   | 7         | 1.02(0.57,1.84)               | 2.45(1.45,4.13)                |
| Pancreas                                             | lorazepam           | 10(1.1%)      | 14(0.4%)         | 3.59(1.41,9.18)  | 0.008   | 12        | 1.74(0.55,5.49)               | 4.11(1.43,11.81)               |
| Pancreas                                             | methotrexate        | 9(1.0%)       | 9(0.2%)          | 4.39(1.57,12.26) | 0.005   | 14        | 1.25(0.32,4.90)               | 4.66(1.50,14.48)               |
| Pancreas                                             | quinine             | 46(5.1%)      | 104(2.7%)        | 1.78(1.18,2.68)  | 0.006   | 5         | 0.49(0.28,0.86)               | 1.68(1.11,2.54)                |
| Uterus §                                             | bendroflumethiazide | 194(23.1%)    | 699(18.1%)       | 1.32(1.07,1.63)  | 0.009   | 14        | 0.99(0.77,1.28)               | 1.53(1.20,1.95)                |
| Uterus §                                             | doxazosin           | 33(3.9%)      | 70(1.8%)         | 1.88(1.18,3.00)  | 0.008   | 9         | 1.07(0.59,1.94)               | 1.99(1.19,3.33)                |
| Uterus §                                             | enalapril           | 45(5.4%)      | 92(2.4%)         | 2.35(1.53,3.60)  | <0.001  | 14        | 1.34(0.75,2.41)               | 2.67(1.65,4.31)                |
| Uterus §                                             | loperamide          | 12(1.4%)      | 30(0.8%)         | 2.88(1.36,6.09)  | 0.006   | 1         | 1.02(0.64,1.65)               | 1.35(0.75,2.42)                |
| Uterus §                                             | salicylic acid*     | 7(0.8%)       | 8(0.2%)          | 6.85(2.15,21.83) | 0.001   | 1         | 0.89(0.47,1.69)               | 2.29(1.25,4.23)                |
| Myeloma                                              | chlortalidone       | 11(2.5%)      | 22(1.2%)         | 3.06(1.32,7.12)  | 0.009   | 14        | 1.15(0.39,3.36)               | 3.68(1.46,9.31)                |
| Liver                                                | furosemide          | 89(19.8%)     | 143(7.4%)        | 2.48(1.58,3.88)  | <0.001  | 12        | 1.19(0.73,1.96)               | 2.23(1.35,3.69)                |
| Thyroid                                              | progestogen (HRT) § | 17(8.5%)      | 42(4.5%)         | 2.55(1.27,5.11)  | 0.008   | 3         | 1.19(0.67,2.10)               | 2.05(1.09,3.84)                |
| Anal                                                 | bisoprolol          | 12(5.3%)      | 24(2.5%)         | 3.30(1.34,8.14)  | 0.010   | 14        | 1.69(0.62,4.64)               | 3.10(1.01,9.45)                |
| Anal                                                 | nicotine            | 5(2.2%)       | 3(0.3%)          | 8.07(1.69,38.46) | 0.009   | 2         | 0.93(0.41,2.13)               | 1.85(0.73,4.70)                |
| <b>Signals associated with decreased cancer risk</b> |                     |               |                  |                  |         |           |                               |                                |
| Breast §                                             | Iron                | 164(1.7%)     | 854(1.9%)        | 0.72(0.60,0.86)  | <0.001  | 2         | 0.97(0.86,1.08)               | 0.80(0.70,0.92)                |
| Breast §                                             | trazodone           | 50(0.5%)      | 365(0.8%)        | 0.62(0.46,0.85)  | 0.003   | 3         | 0.75(0.60,0.96)               | 0.72(0.55,0.95)                |
| Breast §                                             | trimethoprim        | 82(0.8%)      | 493(1.1%)        | 0.71(0.55,0.90)  | 0.005   | 1         | 1.03(0.95,1.11)               | 0.93(0.84,1.02)                |
| Colorectal                                           | diclofenac          | 293(4.3%)     | 1,694(5.9%)      | 0.72(0.63,0.83)  | <0.001  | 2         | 0.94(0.86,1.03)               | 0.84(0.75,0.93)                |
| Colorectal                                           | lactulose           | 207(3.1%)     | 896(3.1%)        | 0.77(0.65,0.91)  | 0.003   | 3         | 0.98(0.86,1.11)               | 0.80(0.68,0.93)                |
| Colorectal                                           | naproxen            | 85(1.3%)      | 487(1.7%)        | 0.71(0.56,0.91)  | 0.007   | 2         | 0.87(0.74,1.03)               | 0.77(0.63,0.94)                |

**Table S4 (cont)**

| Cancer                 | Medicine          | No. (%) cases | No. (%) controls | OR (95%CI)      | p-value | Median †† | Low use v non-use: OR (95%CI) | High use v non-use: OR (95%CI) |
|------------------------|-------------------|---------------|------------------|-----------------|---------|-----------|-------------------------------|--------------------------------|
| Colorectal             | oxybutynin        | 38(0.6%)      | 227(0.8%)        | 0.60(0.42,0.87) | 0.006   | 4         | 1.04(0.79,1.36)               | 0.66(0.47,0.93)                |
| Prostate §§            | calcium           | 78(1.3%)      | 390(1.6%)        | 0.67(0.51,0.89) | 0.006   | 7         | 0.90(0.69,1.17)               | 0.68(0.50,0.93)                |
| Prostate §§            | citalopram        | 41(0.7%)      | 319(1.3%)        | 0.53(0.37,0.75) | <0.001  | 5         | 0.98(0.76,1.27)               | 0.53(0.37,0.75)                |
| Prostate §§            | furosemide        | 362(6.1%)     | 1,761(7.2%)      | 0.74(0.64,0.85) | <0.001  | 12        | 0.98(0.85,1.13)               | 0.71(0.60,0.84)                |
| Prostate §§            | lactulose         | 138(2.3%)     | 631(2.6%)        | 0.70(0.57,0.86) | 0.001   | 2         | 0.95(0.82,1.10)               | 0.73(0.62,0.88)                |
| Prostate §§            | senna             | 67(1.1%)      | 328(1.3%)        | 0.67(0.50,0.90) | 0.007   | 2         | 0.91(0.75,1.10)               | 0.61(0.48,0.78)                |
| Prostate §§            | vitamin D         | 61(1.0%)      | 342(1.4%)        | 0.60(0.44,0.82) | 0.001   | 6         | 0.99(0.76,1.29)               | 0.60(0.43,0.83)                |
| Bladder                | pantoprazole      | 5(0.2%)       | 43(0.4%)         | 0.27(0.10,0.71) | 0.008   | 7         | 2.08(1.16,3.72)               | 0.22(0.08,0.66)                |
| Bladder                | sotalol           | 5(0.2%)       | 63(0.6%)         | 0.25(0.09,0.71) | 0.010   | 13        | 0.19(0.05,0.82)               | 0.18(0.04,0.78)                |
| Oesophagus             | aspirin high dose | 28(1.5%)      | 167(2.1%)        | 0.52(0.33,0.83) | 0.006   | 10        | 0.88(0.57,1.38)               | 0.53(0.31,0.89)                |
| Non-Hodgkin's lymphoma | vitamin B         | 26(1.6%)      | 143(2.0%)        | 0.51(0.32,0.81) | 0.004   | 5         | 0.96(0.68,1.35)               | 0.50(0.32,0.81)                |
| Leukaemia              | calcium           | 42(2.9%)      | 205(3.3%)        | 0.56(0.37,0.85) | 0.007   | 7         | 0.83(0.56,1.23)               | 0.50(0.32,0.79)                |
| Stomach                | diclofenac*       | 3(0.3%)       | 44(0.9%)         | 0.18(0.05,0.63) | 0.007   | 1         | 0.97(0.61,1.56)               | 0.60(0.33,1.07)                |
| Kidney                 | digoxin           | 15(1.3%)      | 83(1.8%)         | 0.43(0.23,0.80) | 0.008   | 19        | 0.79(0.41,1.53)               | 0.38(0.17,0.86)                |

† comorbidities include diabetes, myocardial infarction, coronary heart disease, heart failure, peripheral vascular disease, dementia, cerebrovascular disease, chronic obstructive pulmonary disease, osteoporosis, rheumatological disease, renal disease, liver disease, irritable bowel disease, human immunodeficiency viruses and hemiplegia/paraplegia, plus potential site-specific confounders; OR odds ratio; CI confidence interval; medicines systemic unless otherwise indicated\* (local); HRT: hormone replacement therapy; § analyses restricted to females only; §§ analyses restricted to males only; low use: patient received more than 1 item of medicine and <=median number of items; high use: patient received > median number of items of medicine; †† among control users; - no cases with >=6 prescriptions in category

**Table S5: Sensitivity analyses for comorbidity<sup>†</sup> adjusted signals: exposure any prescription**

| Cancer                                               | Medicine         | 1 year lag (main analysis) |         | 2 year lag      |         | Exclude matched sets where cases have additional cancer diagnosis within 12 months |         | Adjusted for comorbidities, smoking & alcohol |         |
|------------------------------------------------------|------------------|----------------------------|---------|-----------------|---------|------------------------------------------------------------------------------------|---------|-----------------------------------------------|---------|
|                                                      |                  | OR (95%CI)                 | p-value | OR (95%CI)      | p-value | OR (95%CI)                                                                         | p-value | OR (95%CI)                                    | p-value |
| <b>Signals associated with increased cancer risk</b> |                  |                            |         |                 |         |                                                                                    |         |                                               |         |
| Breast §                                             | estrogen-HRT     | 1.26(1.19,1.33)            | <0.001  | 1.27(1.20,1.35) | <0.001  | 1.26(1.19,1.33)                                                                    | <0.001  | 1.22(1.14,1.31)                               | <0.001  |
| Breast §                                             | metronidazole*   | 1.25(1.06,1.48)            | 0.007   | 1.27(1.06,1.52) | 0.009   | 1.26(1.06,1.48)                                                                    | 0.007   | 1.24(1.02,1.51)                               | 0.031   |
| Breast §                                             | progestogen-HRT  | 1.28(1.21,1.35)            | <0.001  | 1.30(1.23,1.38) | <0.001  | 1.28(1.21,1.35)                                                                    | <0.001  | 1.23(1.15,1.31)                               | <0.001  |
| Lung                                                 | amoxicillin      | 1.40(1.33,1.48)            | <0.001  | 1.36(1.28,1.43) | <0.001  | 1.40(1.32,1.48)                                                                    | <0.001  | 1.28(1.19,1.38)                               | <0.001  |
| Lung                                                 | azathioprine     | 1.56(1.14,2.13)            | 0.005   | 1.64(1.18,2.29) | 0.003   | 1.56(1.14,2.14)                                                                    | 0.006   | 1.99(1.32,2.99)                               | 0.001   |
| Lung                                                 | cimetidine       | 1.39(1.27,1.51)            | <0.001  | 1.39(1.27,1.52) | <0.001  | 1.39(1.27,1.52)                                                                    | <0.001  | 1.35(1.20,1.52)                               | <0.001  |
| Lung                                                 | clarithromycin   | 1.34(1.23,1.46)            | <0.001  | 1.35(1.23,1.48) | <0.001  | 1.33(1.22,1.45)                                                                    | <0.001  | 1.30(1.17,1.45)                               | <0.001  |
| Lung                                                 | codeine          | 1.31(1.24,1.38)            | <0.001  | 1.23(1.16,1.30) | <0.001  | 1.31(1.24,1.39)                                                                    | <0.001  | 1.21(1.13,1.31)                               | <0.001  |
| Lung                                                 | dihydrocodeine   | 1.29(1.21,1.38)            | <0.001  | 1.27(1.18,1.36) | <0.001  | 1.29(1.21,1.38)                                                                    | <0.001  | 1.16(1.06,1.27)                               | 0.001   |
| Lung                                                 | folic acid §     | 1.49(1.27,1.75)            | <0.001  | 1.51(1.27,1.80) | <0.001  | 1.51(1.28,1.77)                                                                    | <0.001  | 1.43(1.15,1.76)                               | 0.001   |
| Lung                                                 | ipratropium*     | 1.58(1.43,1.74)            | <0.001  | 1.60(1.44,1.78) | <0.001  | 1.59(1.44,1.76)                                                                    | <0.001  | 1.42(1.25,1.63)                               | <0.001  |
| Lung                                                 | nitrazepam       | 1.35(1.14,1.60)            | <0.001  | 1.37(1.15,1.63) | <0.001  | 1.34(1.13,1.59)                                                                    | 0.001   | 1.55(1.23,1.96)                               | <0.001  |
| Lung                                                 | nystatin         | 1.27(1.12,1.44)            | <0.001  | 1.29(1.12,1.49) | <0.001  | 1.26(1.11,1.42)                                                                    | <0.001  | 1.21(1.03,1.42)                               | 0.019   |
| Lung                                                 | paracetamol      | 1.34(1.27,1.42)            | <0.001  | 1.27(1.20,1.34) | <0.001  | 1.35(1.28,1.43)                                                                    | <0.001  | 1.24(1.15,1.34)                               | <0.001  |
| Lung                                                 | salbutamol*      | 1.44(1.34,1.54)            | <0.001  | 1.36(1.27,1.46) | <0.001  | 1.44(1.34,1.55)                                                                    | <0.001  | 1.39(1.27,1.53)                               | <0.001  |
| Lung                                                 | salmeterol*      | 1.34(1.21,1.48)            | <0.001  | 1.31(1.18,1.46) | <0.001  | 1.34(1.21,1.48)                                                                    | <0.001  | 1.39(1.21,1.58)                               | <0.001  |
| Lung                                                 | tiotropium*      | 1.75(1.52,2.02)            | <0.001  | 1.64(1.38,1.94) | <0.001  | 1.77(1.53,2.04)                                                                    | <0.001  | 1.63(1.37,1.95)                               | <0.001  |
| Colorectal                                           | allopurinol      | 1.27(1.11,1.46)            | 0.001   | 1.31(1.13,1.51) | <0.001  | 1.24(1.08,1.43)                                                                    | 0.002   | 1.26(1.06,1.50)                               | 0.010   |
| Colorectal                                           | prednisolone*    | 1.31(1.12,1.54)            | 0.001   | 1.28(1.07,1.52) | 0.007   | 1.32(1.12,1.54)                                                                    | 0.001   | 1.18(0.97,1.43)                               | 0.090   |
| Prostate §§                                          | cerivastatin     | 1.43(1.10,1.87)            | 0.008   | 1.40(1.06,1.85) | 0.019   | 1.44(1.10,1.89)                                                                    | 0.007   | 1.27(0.91,1.77)                               | 0.168   |
| Prostate §§                                          | clioquinol*      | 1.30(1.11,1.52)            | 0.001   | 1.34(1.13,1.58) | 0.001   | 1.32(1.13,1.54)                                                                    | 0.001   | 1.31(1.09,1.57)                               | 0.004   |
| Bladder                                              | celecoxib        | 1.40(1.14,1.73)            | 0.002   | 1.38(1.10,1.74) | 0.006   | 1.40(1.13,1.74)                                                                    | 0.002   | 1.29(1.01,1.66)                               | 0.040   |
| Bladder                                              | dexamethasone*   | 1.30(1.10,1.54)            | 0.003   | 1.22(1.01,1.48) | 0.041   | 1.29(1.08,1.53)                                                                    | 0.005   | 1.19(0.97,1.46)                               | 0.104   |
| Bladder                                              | nicotine         | 2.04(1.65,2.51)            | <0.001  | 1.97(1.55,2.50) | <0.001  | 2.03(1.64,2.51)                                                                    | <0.001  | 1.65(1.28,2.13)                               | <0.001  |
| Bladder                                              | trimethoprim     | 1.96(1.73,2.21)            | <0.001  | 1.56(1.36,1.78) | <0.001  | 1.95(1.72,2.20)                                                                    | <0.001  | 1.95(1.68,2.26)                               | <0.001  |
| Malignant melanoma                                   | chloramphenicol* | 1.28(1.08,1.51)            | 0.003   | 1.30(1.09,1.55) | 0.004   | 1.28(1.09,1.51)                                                                    | 0.003   | 1.04(0.85,1.27)                               | 0.701   |
| Malignant melanoma                                   | clopidogrel      | 1.60(1.13,2.27)            | 0.008   | 1.61(1.08,2.40) | 0.019   | 1.56(1.09,2.22)                                                                    | 0.014   | 1.51(1.01,2.27)                               | 0.045   |
| Malignant melanoma                                   | flucloxacillin   | 1.28(1.11,1.46)            | <0.001  | 1.28(1.10,1.48) | 0.001   | 1.27(1.11,1.46)                                                                    | 0.001   | 1.27(1.07,1.50)                               | 0.006   |
| Oesophagus                                           | alginic acid     | 1.40(1.22,1.62)            | <0.001  | 1.36(1.17,1.59) | <0.001  | 1.42(1.22,1.64)                                                                    | <0.001  | 1.35(1.12,1.63)                               | 0.002   |
| Oesophagus                                           | azathioprine     | 2.47(1.41,4.35)            | 0.002   | 2.42(1.30,4.51) | 0.005   | 2.47(1.40,4.34)                                                                    | 0.002   | 2.46(1.17,5.20)                               | 0.018   |
| Oesophagus                                           | cisapride        | 2.03(1.27,3.25)            | 0.003   | 1.97(1.23,3.18) | 0.005   | 2.04(1.27,3.26)                                                                    | 0.003   | 2.17(1.13,4.18)                               | 0.020   |
| Oesophagus                                           | gramacidin*      | 1.52(1.11,2.09)            | 0.008   | 1.55(1.10,2.17) | 0.012   | 1.52(1.11,2.09)                                                                    | 0.009   | 1.42(0.96,2.11)                               | 0.080   |
| Oesophagus                                           | lansoprazole     | 1.35(1.17,1.55)            | <0.001  | 1.28(1.10,1.49) | 0.001   | 1.33(1.15,1.53)                                                                    | <0.001  | 1.26(1.06,1.50)                               | 0.009   |
| Oesophagus                                           | nicotine         | 1.50(1.16,1.94)            | 0.002   | 1.35(1.01,1.80) | 0.043   | 1.51(1.17,1.96)                                                                    | 0.002   | 1.18(0.87,1.60)                               | 0.277   |
| Oesophagus                                           | nystatin         | 1.58(1.21,2.06)            | 0.001   | 1.68(1.25,2.25) | 0.001   | 1.56(1.19,2.04)                                                                    | 0.001   | 1.76(1.27,2.43)                               | 0.001   |
| Oesophagus                                           | nystatin*        | 1.29(1.08,1.55)            | 0.005   | 1.34(1.11,1.63) | 0.003   | 1.27(1.06,1.53)                                                                    | 0.010   | 1.44(1.16,1.79)                               | 0.001   |



Table S5 (cont)

| Cancer                        | Medicine            | 1 year lag (main analysis) |         | 2 year lag      |         | Exclude matched sets where cases have additional cancer diagnosis within 12 months |         | Adjusted for comorbidities, smoking & alcohol |         |
|-------------------------------|---------------------|----------------------------|---------|-----------------|---------|------------------------------------------------------------------------------------|---------|-----------------------------------------------|---------|
|                               |                     | OR (95%CI)                 | p-value | OR (95%CI)      | p-value | OR (95%CI)                                                                         | p-value | OR (95%CI)                                    | p-value |
| Oesophagus                    | omeprazole          | 1.39(1.23,1.57)            | <0.001  | 1.31(1.15,1.50) | <0.001  | 1.39(1.22,1.57)                                                                    | <0.001  | 1.25(1.07,1.46)                               | 0.006   |
| Oesophagus                    | triamcinolone*      | 1.47(1.13,1.91)            | 0.004   | 1.42(1.07,1.88) | 0.016   | 1.48(1.14,1.93)                                                                    | 0.003   | 1.44(1.03,2.00)                               | 0.033   |
| Oesophagus                    | vitamin B           | 1.36(1.12,1.65)            | 0.002   | 1.32(1.07,1.62) | 0.010   | 1.37(1.12,1.66)                                                                    | 0.002   | 1.13(0.87,1.46)                               | 0.352   |
| Non-Hodgkin's lymphoma        | amoxicillin         | 1.34(1.19,1.50)            | <0.001  | 1.29(1.14,1.46) | <0.001  | 1.36(1.21,1.52)                                                                    | <0.001  | 1.22(1.05,1.42)                               | 0.008   |
| Non-Hodgkin's lymphoma        | betamethasone*      | 1.37(1.19,1.57)            | <0.001  | 1.40(1.21,1.63) | <0.001  | 1.37(1.19,1.57)                                                                    | <0.001  | 1.23(1.03,1.47)                               | 0.021   |
| Non-Hodgkin's lymphoma        | chlorhexidine*      | 1.67(1.20,2.31)            | 0.002   | 1.66(1.15,2.39) | 0.007   | 1.69(1.22,2.35)                                                                    | 0.002   | 1.27(0.81,1.98)                               | 0.298   |
| Non-Hodgkin's lymphoma        | clarithromycin      | 1.33(1.09,1.63)            | 0.005   | 1.21(0.97,1.52) | 0.093   | 1.32(1.08,1.62)                                                                    | 0.007   | 1.30(1.02,1.66)                               | 0.033   |
| Non-Hodgkin's lymphoma        | clobetasol*         | 1.73(1.25,2.38)            | 0.001   | 1.78(1.26,2.52) | 0.001   | 1.71(1.23,2.36)                                                                    | 0.001   | 1.50(1.00,2.25)                               | 0.048   |
| Non-Hodgkin's lymphoma        | erythromycin        | 1.26(1.07,1.49)            | 0.006   | 1.21(1.01,1.44) | 0.035   | 1.29(1.09,1.52)                                                                    | 0.003   | 1.25(1.02,1.53)                               | 0.032   |
| Non-Hodgkin's lymphoma        | hydroxyzine         | 1.75(1.16,2.66)            | 0.008   | 1.74(1.07,2.81) | 0.024   | 1.67(1.09,2.56)                                                                    | 0.018   | 1.75(1.07,2.87)                               | 0.027   |
| Non-Hodgkin's lymphoma        | methotrexate        | 2.93(1.50,5.69)            | 0.002   | 3.22(1.61,6.44) | 0.001   | 3.01(1.54,5.89)                                                                    | 0.001   | 3.66(1.58,8.45)                               | 0.002   |
| Non-Hodgkin's lymphoma        | prednisolone        | 1.37(1.13,1.66)            | 0.001   | 1.33(1.08,1.64) | 0.007   | 1.36(1.12,1.65)                                                                    | 0.002   | 1.45(1.14,1.83)                               | 0.002   |
| Non-Hodgkin's lymphoma        | prochlorperazine    | 1.30(1.08,1.58)            | 0.007   | 1.32(1.07,1.63) | 0.009   | 1.31(1.08,1.59)                                                                    | 0.007   | 1.39(1.10,1.75)                               | 0.006   |
| Leukaemia                     | allopurinol         | 1.57(1.20,2.06)            | 0.001   | 1.44(1.07,1.93) | 0.015   | 1.56(1.18,2.05)                                                                    | 0.002   | 1.88(1.32,2.68)                               | 0.001   |
| Leukaemia                     | amoxicillin         | 1.29(1.14,1.45)            | <0.001  | 1.22(1.07,1.38) | 0.002   | 1.28(1.13,1.44)                                                                    | <0.001  | 1.15(0.98,1.35)                               | 0.088   |
| Leukaemia                     | trimethoprim        | 1.26(1.06,1.49)            | 0.010   | 1.20(0.99,1.45) | 0.064   | 1.25(1.05,1.49)                                                                    | 0.013   | 1.35(1.08,1.68)                               | 0.009   |
| Oral (inc. Head,neck & nasal) | codeine             | 1.29(1.12,1.49)            | <0.001  | 1.28(1.11,1.49) | 0.001   | 1.27(1.10,1.47)                                                                    | 0.001   | 1.10(0.91,1.32)                               | 0.336   |
| Oral (inc. Head,neck & nasal) | flucloxacillin      | 1.36(1.13,1.62)            | 0.001   | 1.31(1.08,1.60) | 0.007   | 1.39(1.16,1.67)                                                                    | <0.001  | 1.30(1.04,1.64)                               | 0.024   |
| Oral (inc. Head,neck & nasal) | folic acid §        | 2.52(1.64,3.89)            | <0.001  | 2.42(1.52,3.85) | <0.001  | 2.51(1.62,3.88)                                                                    | <0.001  | 2.38(1.29,4.39)                               | 0.006   |
| Oral (inc. Head,neck & nasal) | nystatin            | 2.06(1.49,2.85)            | <0.001  | 1.94(1.35,2.79) | <0.001  | 2.06(1.48,2.85)                                                                    | <0.001  | 1.73(1.15,2.61)                               | 0.009   |
| Oral (inc. Head,neck & nasal) | vitamin B           | 2.75(2.22,3.41)            | <0.001  | 2.73(2.17,3.43) | <0.001  | 2.79(2.24,3.47)                                                                    | <0.001  | 2.10(1.57,2.79)                               | <0.001  |
| Oral (inc. Head,neck & nasal) | vitamin D           | 1.69(1.24,2.30)            | 0.001   | 1.78(1.26,2.51) | 0.001   | 1.69(1.24,2.31)                                                                    | 0.001   | 1.65(1.10,2.49)                               | 0.015   |
| Stomach                       | cimetidine          | 1.44(1.15,1.79)            | 0.001   | 1.40(1.12,1.76) | 0.003   | 1.42(1.13,1.78)                                                                    | 0.002   | 4.08(1.54,10.81)                              | 0.005   |
| Stomach                       | clarithromycin      | 1.35(1.08,1.69)            | 0.009   | 1.22(0.95,1.56) | 0.114   | 1.35(1.07,1.70)                                                                    | 0.011   | 1.91(0.94,3.89)                               | 0.075   |
| Stomach                       | digoxin             | 1.49(1.10,2.01)            | 0.010   | 1.43(1.03,1.97) | 0.031   | 1.52(1.12,2.07)                                                                    | 0.007   | 1.19(0.90,1.59)                               | 0.220   |
| Stomach                       | vitamin B           | 1.54(1.21,1.95)            | <0.001  | 1.56(1.21,2.00) | 0.001   | 1.56(1.22,1.98)                                                                    | <0.001  | 1.11(0.85,1.46)                               | 0.436   |
| Ovary §                       | phenytoin           | 3.24(1.62,6.50)            | 0.001   | 3.52(1.74,7.12) | <0.001  | 3.27(1.63,6.55)                                                                    | 0.001   | 1.57(1.08,2.29)                               | 0.019   |
| Ovary §                       | rabeprazole         | 2.18(1.22,3.89)            | 0.009   | 2.68(1.46,4.93) | 0.002   | 2.20(1.23,3.94)                                                                    | 0.008   | 1.98(1.45,2.70)                               | <0.001  |
| Kidney                        | amoxicillin         | 1.28(1.11,1.48)            | 0.001   | 1.19(1.03,1.39) | 0.020   | 1.29(1.11,1.49)                                                                    | 0.001   | 1.28(1.07,1.53)                               | 0.007   |
| Kidney                        | hydrochlorothiazide | 1.93(1.30,2.86)            | 0.001   | 2.01(1.35,3.00) | 0.001   | 2.02(1.36,3.01)                                                                    | 0.001   | 2.29(1.41,3.71)                               | 0.001   |
| Kidney                        | perindopril         | 1.63(1.16,2.30)            | 0.005   | 1.52(1.03,2.23) | 0.035   | 1.73(1.22,2.44)                                                                    | 0.002   | 1.78(1.19,2.67)                               | 0.005   |
| Pancreas                      | betamethasone*      | 1.34(1.11,1.62)            | 0.003   | 1.31(1.07,1.61) | 0.008   | 1.34(1.11,1.62)                                                                    | 0.003   | 1.27(0.96,1.67)                               | 0.093   |
| Pancreas                      | nicotine            | 1.94(1.38,2.73)            | <0.001  | 1.44(0.98,2.12) | 0.064   | 1.99(1.41,2.80)                                                                    | <0.001  | 1.13(0.83,1.52)                               | 0.440   |
| Cervix & other gynae §        | dihydrocodeine      | 1.39(1.11,1.73)            | 0.004   | 1.33(1.05,1.69) | 0.019   | 1.38(1.10,1.72)                                                                    | 0.006   | 1.35(1.07,1.70)                               | 0.012   |
| Cervix & other gynae §        | ranitidine          | 1.37(1.08,1.73)            | 0.010   | 1.31(1.02,1.69) | 0.035   | 1.38(1.08,1.75)                                                                    | 0.009   | 1.18(0.78,1.78)                               | 0.435   |
| Uterus §                      | atenolol            | 1.39(1.15,1.67)            | 0.001   | 1.34(1.11,1.62) | 0.003   | 1.41(1.17,1.70)                                                                    | <0.001  | 1.31(1.05,1.65)                               | 0.019   |

Table S5 (cont)

| Cancer                                               | Medicine                    | 1 year lag (main analysis) |         | 2 year lag       |         | Exclude matched sets where cases have additional cancer diagnosis within 12 months |         | Adjusted for comorbidities, smoking & alcohol |         |
|------------------------------------------------------|-----------------------------|----------------------------|---------|------------------|---------|------------------------------------------------------------------------------------|---------|-----------------------------------------------|---------|
|                                                      |                             | OR (95%CI)                 | p-value | OR (95%CI)       | p-value | OR (95%CI)                                                                         | p-value | OR (95%CI)                                    | p-value |
| Uterus §                                             | bendroflumethiazide         | 1.27(1.07,1.51)            | 0.005   | 1.32(1.10,1.57)  | 0.002   | 1.27(1.07,1.51)                                                                    | 0.006   | 1.24(1.01,1.53)                               | 0.041   |
| Uterus §                                             | bisoprolol                  | 1.82(1.21,2.74)            | 0.004   | 1.94(1.24,3.02)  | 0.004   | 1.79(1.18,2.74)                                                                    | 0.007   | 1.64(1.03,2.61)                               | 0.037   |
| Uterus §                                             | doxazosin                   | 1.68(1.17,2.43)            | 0.005   | 1.78(1.21,2.63)  | 0.003   | 1.67(1.15,2.43)                                                                    | 0.007   | 1.46(0.94,2.26)                               | 0.088   |
| Uterus §                                             | enalapril                   | 1.66(1.18,2.33)            | 0.003   | 1.78(1.26,2.52)  | 0.001   | 1.77(1.26,2.50)                                                                    | 0.001   | 2.31(1.52,3.52)                               | <0.001  |
| Uterus §                                             | ibuprofen*                  | 1.53(1.14,2.06)            | 0.005   | 1.73(1.26,2.38)  | 0.001   | 1.54(1.15,2.08)                                                                    | 0.004   | 1.24(0.86,1.79)                               | 0.241   |
| Uterus §                                             | mefenamic acid              | 1.72(1.22,2.42)            | 0.002   | 1.48(1.03,2.13)  | 0.032   | 1.78(1.27,2.51)                                                                    | 0.001   | 1.54(1.01,2.35)                               | 0.046   |
| Uterus §                                             | tranexamic acid             | 1.87(1.25,2.79)            | 0.002   | 1.34(0.85,2.12)  | 0.212   | 1.96(1.31,2.93)                                                                    | 0.001   | 1.27(0.79,2.02)                               | 0.325   |
| Larynx                                               | benzylamine*                | 2.33(1.34,4.04)            | 0.003   | 1.71(0.90,3.23)  | 0.101   | 2.11(1.18,3.79)                                                                    | 0.012   | 1.49(0.78,2.86)                               | 0.228   |
| Larynx                                               | dextropropoxyphene          | 1.51(1.19,1.92)            | 0.001   | 1.52(1.19,1.95)  | 0.001   | 1.53(1.20,1.96)                                                                    | 0.001   | 2.35(1.07,5.14)                               | 0.033   |
| Larynx                                               | paracetamol                 | 1.45(1.20,1.76)            | <0.001  | 1.36(1.12,1.65)  | 0.002   | 1.48(1.22,1.81)                                                                    | <0.001  | 1.60(1.15,2.24)                               | 0.006   |
| Larynx                                               | vitamin B                   | 2.40(1.72,3.36)            | <0.001  | 2.24(1.54,3.25)  | <0.001  | 2.54(1.80,3.58)                                                                    | <0.001  | 1.30(0.98,1.72)                               | 0.067   |
| Brain and CNS                                        | carbamazepine               | 2.20(1.34,3.62)            | 0.002   | 1.76(1.01,3.06)  | 0.047   | 2.27(1.37,3.73)                                                                    | 0.001   | 1.49(0.95,2.33)                               | 0.083   |
| Myeloma                                              | amoxicillin                 | 1.53(1.21,1.92)            | <0.001  | 1.56(1.23,1.98)  | <0.001  | 1.56(1.24,1.97)                                                                    | <0.001  | 1.33(0.99,1.79)                               | 0.060   |
| Myeloma                                              | ciprofloxacin               | 1.73(1.17,2.55)            | 0.006   | 1.68(1.09,2.58)  | 0.019   | 1.84(1.24,2.72)                                                                    | 0.002   | 1.58(0.99,2.54)                               | 0.056   |
| Thyroid                                              | gabapentin                  | 5.13(1.71,15.37)           | 0.003   | 4.05(1.17,14.09) | 0.028   | 5.00(1.67,15.01)                                                                   | 0.004   | 3.99(1.01,15.82)                              | 0.049   |
| Thyroid                                              | levothyroxine               | 2.18(1.37,3.48)            | 0.001   | 2.45(1.50,4.01)  | <0.001  | 2.27(1.42,3.64)                                                                    | 0.001   | 2.72(1.43,5.17)                               | 0.002   |
| Anal                                                 | clonidine                   | 3.87(1.52,9.85)            | 0.005   | 5.16(1.87,14.27) | 0.002   | 5.08(1.89,13.67)                                                                   | 0.001   | 7.31(2.16,24.74)                              | 0.001   |
| Anal                                                 | doxazosin                   | 2.48(1.27,4.86)            | 0.008   | 3.83(1.83,8.04)  | <0.001  | 2.40(1.17,4.96)                                                                    | 0.018   | 2.99(1.25,7.14)                               | 0.014   |
| <b>Signals associated with decreased cancer risk</b> |                             |                            |         |                  |         |                                                                                    |         |                                               |         |
| Breast §                                             | trazodone                   | 0.79(0.67,0.93)            | 0.005   | 0.80(0.67,0.96)  | 0.015   | 0.80(0.68,0.94)                                                                    | 0.007   | 0.75(0.62,0.92)                               | 0.005   |
| Lung                                                 | fluocinolone*               | 0.67(0.52,0.88)            | 0.003   | 0.68(0.52,0.90)  | 0.008   | 0.68(0.52,0.88)                                                                    | 0.004   | 0.66(0.47,0.92)                               | 0.014   |
| Lung                                                 | levodopa                    | 0.50(0.35,0.73)            | <0.001  | 0.40(0.26,0.61)  | <0.001  | 0.49(0.33,0.71)                                                                    | <0.001  | 0.66(0.41,1.06)                               | 0.087   |
| Lung                                                 | nitrofurantoin              | 0.74(0.60,0.93)            | 0.008   | 0.74(0.58,0.95)  | 0.018   | 0.72(0.58,0.91)                                                                    | 0.005   | 0.73(0.56,0.96)                               | 0.024   |
| Lung                                                 | progestogen-contraceptive § | 0.62(0.45,0.86)            | 0.004   | 0.57(0.41,0.80)  | 0.001   | 0.64(0.46,0.88)                                                                    | 0.007   | 0.55(0.36,0.86)                               | 0.008   |
| Lung                                                 | risperidone                 | 0.55(0.36,0.84)            | 0.005   | 0.57(0.36,0.90)  | 0.017   | 0.56(0.37,0.85)                                                                    | 0.006   | 0.57(0.33,1.01)                               | 0.054   |
| Colorectal                                           | levodopa                    | 0.60(0.43,0.85)            | 0.004   | 0.61(0.42,0.88)  | 0.009   | 0.62(0.44,0.87)                                                                    | 0.007   | 0.74(0.48,1.14)                               | 0.170   |
| Colorectal                                           | lofepramine                 | 0.71(0.55,0.92)            | 0.009   | 0.74(0.56,0.97)  | 0.028   | 0.73(0.56,0.94)                                                                    | 0.016   | 0.68(0.49,0.94)                               | 0.021   |
| Colorectal                                           | meloxicam                   | 0.76(0.63,0.92)            | 0.005   | 0.77(0.62,0.95)  | 0.014   | 0.78(0.64,0.94)                                                                    | 0.010   | 0.74(0.59,0.93)                               | 0.008   |
| Colorectal                                           | metoclopramide              | 0.78(0.68,0.91)            | 0.001   | 0.77(0.65,0.91)  | 0.002   | 0.80(0.69,0.93)                                                                    | 0.003   | 0.78(0.65,0.93)                               | 0.005   |
| Colorectal                                           | nitrofurantoin              | 0.71(0.56,0.91)            | 0.006   | 0.55(0.41,0.73)  | <0.001  | 0.71(0.56,0.91)                                                                    | 0.006   | 0.65(0.48,0.87)                               | 0.003   |
| Prostate §§                                          | levodopa                    | 0.47(0.30,0.72)            | 0.001   | 0.48(0.30,0.78)  | 0.003   | 0.47(0.30,0.72)                                                                    | 0.001   | 0.44(0.25,0.80)                               | 0.007   |
| Prostate §§                                          | risperidone                 | 0.37(0.20,0.70)            | 0.002   | 0.42(0.21,0.84)  | 0.013   | 0.40(0.22,0.75)                                                                    | 0.004   | 0.44(0.20,0.96)                               | 0.038   |
| Prostate §§                                          | senna                       | 0.76(0.66,0.87)            | <0.001  | 0.73(0.62,0.85)  | <0.001  | 0.75(0.65,0.87)                                                                    | <0.001  | 0.78(0.65,0.92)                               | 0.004   |
| Bladder                                              | iron                        | 0.77(0.64,0.91)            | 0.003   | 0.72(0.59,0.88)  | 0.001   | 0.77(0.65,0.92)                                                                    | 0.005   | 0.81(0.65,1.01)                               | 0.056   |
| Malignant melanoma                                   | dipyridamole                | 0.42(0.22,0.80)            | 0.008   | 0.35(0.17,0.72)  | 0.005   | 0.43(0.22,0.81)                                                                    | 0.009   | 0.61(0.29,1.27)                               | 0.187   |
| Malignant melanoma                                   | gliclazide                  | 0.51(0.32,0.80)            | 0.004   | 0.49(0.30,0.79)  | 0.004   | 0.53(0.34,0.83)                                                                    | 0.006   | 0.41(0.24,0.69)                               | 0.001   |
| Oesophagus                                           | estrogen-HRT §              | 0.59(0.43,0.79)            | <0.001  | 0.61(0.46,0.83)  | 0.001   | 0.60(0.45,0.82)                                                                    | 0.001   | 0.56(0.39,0.81)                               | 0.002   |

Table S5 (cont)

| Cancer                        | Medicine                    | 1 year lag (main analysis) |         | 2 year lag      |         | Exclude matched sets where cases have additional cancer diagnosis within 12 months |         | Adjusted for comorbidities, smoking & alcohol |         |
|-------------------------------|-----------------------------|----------------------------|---------|-----------------|---------|------------------------------------------------------------------------------------|---------|-----------------------------------------------|---------|
|                               |                             | OR (95%CI)                 | p-value | OR (95%CI)      | p-value | OR (95%CI)                                                                         | p-value | OR (95%CI)                                    | p-value |
| Non-Hodgkin's lymphoma        | progestogen-contraceptive § | 0.56(0.36,0.86)            | 0.008   | 0.51(0.32,0.80) | 0.004   | 0.54(0.35,0.85)                                                                    | 0.007   | 0.54(0.32,0.93)                               | 0.027   |
| Oral (inc. Head,neck & nasal) | doxycycline                 | 0.45(0.30,0.66)            | <0.001  | 0.45(0.29,0.69) | <0.001  | 0.43(0.28,0.64)                                                                    | <0.001  | 0.41(0.25,0.67)                               | <0.001  |
| Oral (inc. Head,neck & nasal) | ispaghula                   | 0.63(0.47,0.85)            | 0.002   | 0.62(0.45,0.85) | 0.003   | 0.65(0.48,0.87)                                                                    | 0.005   | 0.72(0.49,1.04)                               | 0.083   |
| Ovary §                       | loratadine                  | 0.64(0.46,0.89)            | 0.008   | 0.71(0.51,1.00) | 0.050   | 0.63(0.45,0.88)                                                                    | 0.007   | 0.70(0.47,1.04)                               | 0.076   |
| Ovary §                       | progestogen-contraceptive   | 0.55(0.39,0.78)            | 0.001   | 0.52(0.37,0.75) | <0.001  | 0.56(0.39,0.79)                                                                    | 0.001   | 0.47(0.30,0.72)                               | 0.001   |
| Cervix & other gynae §        | terbinafine                 | 0.18(0.07,0.49)            | 0.001   | 0.16(0.05,0.51) | 0.002   | 0.19(0.07,0.52)                                                                    | 0.001   | 0.19(0.07,0.53)                               | 0.002   |
| Uterus §                      | estrogen-HRT                | 0.73(0.60,0.89)            | 0.002   | 0.71(0.58,0.87) | 0.001   | 0.71(0.58,0.87)                                                                    | 0.001   | 0.81(0.64,1.03)                               | 0.081   |
| Uterus §                      | progestogen-contraceptive   | 0.37(0.19,0.69)            | 0.002   | 0.38(0.20,0.72) | 0.003   | 0.37(0.20,0.70)                                                                    | 0.002   | 0.40(0.20,0.80)                               | 0.010   |
| Larynx                        | doxazosin                   | 0.36(0.19,0.70)            | 0.002   | 0.43(0.22,0.84) | 0.014   | 0.37(0.19,0.71)                                                                    | 0.003   | 0.43(0.19,0.98)                               | 0.044   |
| Larynx                        | terbinafine                 | 0.32(0.14,0.75)            | 0.009   | 0.33(0.13,0.84) | 0.020   | 0.33(0.14,0.77)                                                                    | 0.010   | 0.31(0.10,0.99)                               | 0.048   |

† comorbidities include diabetes, myocardial infarction, coronary heart disease, heart failure, peripheral vascular disease, dementia, cerebrovascular disease, chronic obstructive pulmonary disease, osteoporosis, rheumatological disease, renal disease, liver disease, irritable bowel disease, human immunodeficiency viruses and hemiplegia/paraplegia, plus potential site-specific confounders; OR odds ratio; CI confidence interval; CNS: central nervous system; medicines systemic unless otherwise indicated\* (local); HRT: hormone replacement therapy; § females only; §§ males only

**Table S6: Sensitivity analyses for comorbidity<sup>†</sup> & smoking adjusted signals: exposure any prescription**

|                                                      |                         | 1 year lag (main analysis) |         | 2 year lag      |         | Exclude matched sets where cases have additional cancer diagnosis within 12 months |         | 1 year lag with multiple imputation |         | Adjusted for comorbidities smoking & alcohol |         |
|------------------------------------------------------|-------------------------|----------------------------|---------|-----------------|---------|------------------------------------------------------------------------------------|---------|-------------------------------------|---------|----------------------------------------------|---------|
| Cancer                                               | Medicine                | OR (95%CI)                 | p-value | OR (95%CI)      | p-value | OR (95%CI)                                                                         | p-value | OR (95%CI)                          | p-value | OR (95%CI)                                   | p-value |
| <b>Signals associated with increased cancer risk</b> |                         |                            |         |                 |         |                                                                                    |         |                                     |         |                                              |         |
| Breast §                                             | bisoprolol              | 1.30(1.11,1.51)            | 0.001   | 1.27(1.07,1.51) | 0.007   | 1.32(1.13,1.54)                                                                    | <0.001  | 1.34(1.16,1.54)                     | <0.001  | 1.30(1.10,1.54)                              | 0.002   |
| Breast §                                             | metronidazole*          | 1.26(1.06,1.51)            | 0.010   | 1.32(1.09,1.60) | 0.005   | 1.26(1.05,1.50)                                                                    | 0.012   | 1.25(1.06,1.47)                     | 0.009   | 1.24(1.02,1.51)                              | 0.030   |
| Breast §                                             | progestogen (HRT)       | 1.25(1.17,1.33)            | <0.001  | 1.28(1.20,1.37) | <0.001  | 1.25(1.18,1.33)                                                                    | <0.001  | 1.28(1.21,1.35)                     | <0.001  | 1.23(1.15,1.31)                              | <0.001  |
| Lung                                                 | amoxicillin             | 1.29(1.21,1.37)            | <0.001  | 1.26(1.18,1.35) | <0.001  | 1.29(1.20,1.37)                                                                    | <0.001  | 1.37(1.29,1.45)                     | <0.001  | 1.28(1.19,1.37)                              | <0.001  |
| Lung                                                 | azathioprine            | 1.76(1.21,2.57)            | 0.003   | 1.96(1.30,2.95) | 0.001   | 1.81(1.24,2.65)                                                                    | 0.002   | 1.71(1.22,2.39)                     | 0.002   | 2.02(1.34,3.06)                              | 0.001   |
| Lung                                                 | cimetidine              | 1.35(1.22,1.50)            | <0.001  | 1.29(1.16,1.44) | <0.001  | 1.37(1.23,1.52)                                                                    | <0.001  | 1.30(1.19,1.43)                     | <0.001  | 1.35(1.20,1.52)                              | <0.001  |
| Lung                                                 | ipratropium*            | 1.43(1.27,1.61)            | <0.001  | 1.49(1.31,1.69) | <0.001  | 1.45(1.29,1.63)                                                                    | <0.001  | 1.46(1.31,1.62)                     | <0.001  | 1.42(1.24,1.62)                              | <0.001  |
| Lung                                                 | nitrazepam              | 1.34(1.09,1.65)            | 0.005   | 1.44(1.15,1.79) | 0.001   | 1.32(1.07,1.62)                                                                    | 0.009   | 1.30(1.09,1.57)                     | 0.005   | 1.52(1.21,1.93)                              | <0.001  |
| Lung                                                 | salbutamol*             | 1.35(1.24,1.47)            | <0.001  | 1.28(1.18,1.40) | <0.001  | 1.35(1.24,1.47)                                                                    | <0.001  | 1.41(1.30,1.52)                     | <0.001  | 1.38(1.26,1.52)                              | <0.001  |
| Lung                                                 | salmeterol*             | 1.44(1.28,1.62)            | <0.001  | 1.47(1.29,1.67) | <0.001  | 1.45(1.28,1.63)                                                                    | <0.001  | 1.42(1.27,1.58)                     | <0.001  | 1.38(1.21,1.58)                              | <0.001  |
| Lung                                                 | tiotropium*             | 1.63(1.39,1.91)            | <0.001  | 1.49(1.23,1.80) | <0.001  | 1.63(1.39,1.91)                                                                    | <0.001  | 1.66(1.43,1.94)                     | <0.001  | 1.61(1.35,1.92)                              | <0.001  |
| Colorectal                                           | allopurinol             | 1.26(1.08,1.48)            | 0.004   | 1.31(1.10,1.56) | 0.002   | 1.22(1.04,1.44)                                                                    | 0.015   | 1.26(1.10,1.45)                     | 0.001   | 1.26(1.06,1.50)                              | 0.010   |
| Prostate §§                                          | alfuzosin               | 1.66(1.37,2.01)            | <0.001  | 1.58(1.26,1.98) | <0.001  | 1.62(1.33,1.97)                                                                    | <0.001  | 1.69(1.43,2.01)                     | <0.001  | 1.63(1.32,2.02)                              | <0.001  |
| Prostate §§                                          | clioquinol*             | 1.34(1.13,1.58)            | 0.001   | 1.36(1.13,1.64) | 0.001   | 1.36(1.15,1.61)                                                                    | <0.001  | 1.30(1.11,1.52)                     | 0.001   | 1.31(1.09,1.57)                              | 0.004   |
| Bladder                                              | cefalexin               | 1.37(1.17,1.60)            | <0.001  | 1.30(1.09,1.55) | 0.003   | 1.35(1.15,1.58)                                                                    | <0.001  | 1.43(1.24,1.65)                     | <0.001  | 1.42(1.19,1.69)                              | <0.001  |
| Bladder                                              | ciprofloxacin           | 1.40(1.18,1.65)            | <0.001  | 1.28(1.06,1.55) | 0.012   | 1.38(1.16,1.63)                                                                    | <0.001  | 1.47(1.26,1.72)                     | <0.001  | 1.30(1.08,1.56)                              | 0.005   |
| Bladder                                              | nicotine                | 1.54(1.23,1.94)            | <0.001  | 1.48(1.15,1.92) | 0.003   | 1.56(1.24,1.97)                                                                    | <0.001  | 1.67(1.34,2.07)                     | <0.001  | 1.65(1.28,2.13)                              | <0.001  |
| Bladder                                              | phenoxymethylpenicillin | 1.30(1.08,1.56)            | 0.006   | 1.22(0.99,1.50) | 0.064   | 1.31(1.08,1.58)                                                                    | 0.005   | 1.23(1.04,1.46)                     | 0.017   | 1.34(1.10,1.65)                              | 0.005   |
| Bladder                                              | quinine                 | 1.28(1.06,1.54)            | 0.009   | 1.30(1.06,1.60) | 0.011   | 1.28(1.06,1.55)                                                                    | 0.009   | 1.19(1.01,1.41)                     | 0.043   | 1.37(1.11,1.68)                              | 0.003   |
| Bladder                                              | ranitidine              | 1.26(1.10,1.44)            | 0.001   | 1.31(1.13,1.51) | <0.001  | 1.25(1.09,1.44)                                                                    | 0.002   | 1.24(1.10,1.40)                     | <0.001  | 1.29(1.11,1.49)                              | 0.001   |
| Bladder                                              | trimethoprim            | 1.92(1.68,2.20)            | <0.001  | 1.57(1.35,1.83) | <0.001  | 1.91(1.67,2.19)                                                                    | <0.001  | 1.99(1.76,2.25)                     | <0.001  | 1.94(1.67,2.25)                              | <0.001  |
| Malignant melanoma                                   | clopidogrel             | 1.63(1.13,2.36)            | 0.009   | 1.55(1.01,2.39) | 0.045   | 1.60(1.10,2.33)                                                                    | 0.014   | 1.61(1.14,2.28)                     | 0.007   | 1.51(1.01,2.26)                              | 0.047   |
| Oesophagus                                           | alginic acid            | 1.38(1.17,1.63)            | <0.001  | 1.34(1.12,1.61) | 0.002   | 1.39(1.17,1.65)                                                                    | <0.001  | 1.41(1.21,1.63)                     | <0.001  | 1.36(1.13,1.64)                              | 0.001   |
| Oesophagus                                           | azathioprine            | 3.39(1.79,6.42)            | <0.001  | 3.70(1.77,7.72) | <0.001  | 3.29(1.73,6.25)                                                                    | <0.001  | 2.71(1.53,4.79)                     | 0.001   | 2.38(1.12,5.04)                              | 0.024   |
| Oesophagus                                           | ipratropium*            | 1.45(1.11,1.89)            | 0.006   | 1.59(1.19,2.14) | 0.002   | 1.44(1.10,1.88)                                                                    | 0.009   | 1.40(1.10,1.76)                     | 0.005   | 1.66(1.23,2.26)                              | 0.001   |
| Oesophagus                                           | lansoprazole            | 1.33(1.14,1.55)            | <0.001  | 1.23(1.03,1.46) | 0.019   | 1.31(1.12,1.53)                                                                    | 0.001   | 1.34(1.16,1.54)                     | <0.001  | 1.27(1.07,1.51)                              | 0.008   |
| Oesophagus                                           | nystatin                | 1.65(1.23,2.20)            | 0.001   | 1.86(1.34,2.58) | <0.001  | 1.61(1.20,2.15)                                                                    | 0.001   | 1.60(1.22,2.10)                     | 0.001   | 1.76(1.27,2.44)                              | 0.001   |
| Oesophagus                                           | nystatin*               | 1.36(1.12,1.67)            | 0.002   | 1.46(1.17,1.82) | 0.001   | 1.32(1.08,1.62)                                                                    | 0.007   | 1.34(1.11,1.60)                     | 0.002   | 1.44(1.16,1.80)                              | 0.001   |
| Oesophagus                                           | omeprazole              | 1.29(1.12,1.48)            | <0.001  | 1.27(1.09,1.48) | 0.003   | 1.29(1.12,1.49)                                                                    | <0.001  | 1.39(1.23,1.58)                     | <0.001  | 1.26(1.07,1.47)                              | 0.004   |
| Non-Hodgkin's lymphoma                               | betamethasone*          | 1.26(1.08,1.48)            | 0.004   | 1.24(1.04,1.47) | 0.014   | 1.26(1.07,1.47)                                                                    | 0.004   | 1.37(1.19,1.57)                     | <0.001  | 1.23(1.03,1.47)                              | 0.020   |
| Non-Hodgkin's lymphoma                               | clobetasol*             | 1.72(1.20,2.46)            | 0.003   | 1.77(1.19,2.62) | 0.004   | 1.70(1.18,2.44)                                                                    | 0.004   | 1.73(1.25,2.39)                     | 0.001   | 1.50(1.00,2.25)                              | 0.048   |
| Non-Hodgkin's lymphoma                               | erythromycin            | 1.28(1.07,1.54)            | 0.008   | 1.29(1.06,1.58) | 0.012   | 1.30(1.08,1.57)                                                                    | 0.005   | 1.26(1.07,1.48)                     | 0.006   | 1.25(1.02,1.53)                              | 0.032   |
| Leukaemia                                            | oxybutynin              | 1.93(1.21,3.09)            | 0.006   | 1.77(1.06,2.95) | 0.030   | 1.99(1.24,3.18)                                                                    | 0.004   | 1.62(1.12,2.35)                     | 0.011   | 1.83(1.08,3.09)                              | 0.024   |
| Oral (inc. Head,neck & nasal)                        | clobetasone*            | 1.41(1.10,1.81)            | 0.007   | 1.26(0.95,1.66) | 0.105   | 1.39(1.08,1.79)                                                                    | 0.010   | 1.30(1.03,1.63)                     | 0.027   | 1.38(1.04,1.83)                              | 0.026   |
| Oral (inc. Head,neck & nasal)                        | nystatin                | 1.92(1.33,2.77)            | 0.001   | 1.89(1.26,2.86) | 0.002   | 1.91(1.32,2.77)                                                                    | 0.001   | 2.17(1.55,3.03)                     | <0.001  | 1.73(1.15,2.61)                              | 0.009   |

Table S6 (cont)

| Cancer                                               | Medicine            | 1 year lag (main analysis) |         | 2 year lag       |         | Exclude matched sets where cases have additional cancer diagnosis within 12 months |         | 1 year lag with multiple imputation |         | Adjusted for comorbidities smoking & alcohol |         |
|------------------------------------------------------|---------------------|----------------------------|---------|------------------|---------|------------------------------------------------------------------------------------|---------|-------------------------------------|---------|----------------------------------------------|---------|
|                                                      |                     | OR (95%CI)                 | p-value | OR (95%CI)       | p-value | OR (95%CI)                                                                         | p-value | OR (95%CI)                          | p-value | OR (95%CI)                                   | p-value |
| Oral (inc. Head,neck & nasal)                        | vitamin B           | 2.33(1.82,3.00)            | <0.001  | 2.55(1.94,3.36)  | <0.001  | 2.39(1.85,3.08)                                                                    | <0.001  | 2.40(1.92,3.00)                     | <0.001  | 2.09(1.57,2.79)                              | <0.001  |
| Ovary §                                              | phenytoin           | 3.86(1.68,8.89)            | 0.002   | 3.66(1.54,8.71)  | 0.003   | 3.84(1.67,8.87)                                                                    | 0.002   | 3.20(1.60,6.42)                     | 0.001   | 4.06(1.53,10.77)                             | 0.005   |
| Stomach                                              | codeine             | 1.35(1.15,1.59)            | <0.001  | 1.32(1.11,1.57)  | 0.002   | 1.36(1.15,1.61)                                                                    | <0.001  | 1.32(1.15,1.53)                     | <0.001  | 1.31(1.09,1.57)                              | 0.004   |
| Stomach                                              | nicotines*          | 2.09(1.29,3.39)            | 0.003   | 2.38(1.40,4.05)  | 0.001   | 2.10(1.29,3.44)                                                                    | 0.003   | 1.63(1.03,2.57)                     | 0.036   | 1.95(1.12,3.40)                              | 0.018   |
| Stomach                                              | vitamin B           | 1.55(1.18,2.03)            | 0.002   | 1.66(1.23,2.23)  | 0.001   | 1.61(1.22,2.12)                                                                    | 0.001   | 1.51(1.19,1.92)                     | 0.001   | 1.99(1.46,2.71)                              | <0.001  |
| Kidney                                               | hydrochlorothiazide | 2.21(1.45,3.37)            | <0.001  | 2.71(1.73,4.24)  | <0.001  | 2.39(1.55,3.67)                                                                    | <0.001  | 1.97(1.33,2.92)                     | 0.001   | 2.30(1.42,3.72)                              | 0.001   |
| Kidney                                               | perindopril         | 1.76(1.21,2.54)            | 0.003   | 1.62(1.05,2.48)  | 0.028   | 1.87(1.28,2.72)                                                                    | 0.001   | 1.65(1.17,2.33)                     | 0.004   | 1.78(1.19,2.67)                              | 0.005   |
| Pancreas                                             | amoxicillin         | 1.31(1.09,1.56)            | 0.003   | 1.34(1.11,1.62)  | 0.003   | 1.30(1.09,1.56)                                                                    | 0.004   | 1.44(1.23,1.69)                     | <0.001  | 1.30(1.07,1.59)                              | 0.010   |
| Uterus §                                             | chlortalidone       | 2.14(1.32,3.49)            | 0.002   | 1.82(1.09,3.05)  | 0.022   | 2.26(1.38,3.68)                                                                    | 0.001   | 2.52(1.67,3.80)                     | <0.001  | 2.35(1.36,4.04)                              | 0.002   |
| Uterus §                                             | enalapril           | 2.00(1.38,2.92)            | <0.001  | 2.17(1.47,3.20)  | <0.001  | 2.14(1.46,3.12)                                                                    | <0.001  | 1.63(1.16,2.29)                     | 0.005   | 2.30(1.51,3.51)                              | <0.001  |
| Brain and CNS                                        | zinc oxide*         | 1.97(1.19,3.27)            | 0.008   | 2.24(1.29,3.91)  | 0.004   | 1.92(1.14,3.22)                                                                    | 0.014   | 1.71(1.08,2.71)                     | 0.023   | 2.08(1.19,3.63)                              | 0.010   |
| Larynx                                               | dextropropoxyphene  | 1.54(1.14,2.08)            | 0.004   | 1.67(1.22,2.28)  | 0.001   | 1.54(1.13,2.09)                                                                    | 0.006   | 1.50(1.16,1.95)                     | 0.002   | 1.59(1.14,2.23)                              | 0.007   |
| Larynx                                               | paracetamol         | 1.40(1.10,1.79)            | 0.007   | 1.28(0.99,1.65)  | 0.057   | 1.44(1.12,1.86)                                                                    | 0.004   | 1.35(1.09,1.66)                     | 0.005   | 1.29(0.98,1.71)                              | 0.073   |
| Larynx                                               | vitamin B           | 1.80(1.21,2.68)            | 0.004   | 1.84(1.17,2.90)  | 0.009   | 1.82(1.21,2.74)                                                                    | 0.004   | 2.00(1.39,2.88)                     | <0.001  | 1.47(0.94,2.31)                              | 0.093   |
| Myeloma                                              | amoxicillin         | 1.44(1.11,1.86)            | 0.006   | 1.46(1.11,1.93)  | 0.007   | 1.47(1.13,1.91)                                                                    | 0.004   | 1.54(1.23,1.94)                     | <0.001  | 1.34(0.99,1.81)                              | 0.054   |
| Myeloma                                              | clioquinol*         | 2.49(1.30,4.75)            | 0.006   | 2.38(1.21,4.69)  | 0.012   | 2.52(1.32,4.80)                                                                    | 0.005   | 2.17(1.22,3.89)                     | 0.009   | 2.32(1.12,4.81)                              | 0.024   |
| Myeloma                                              | paracetamol         | 1.51(1.16,1.96)            | 0.002   | 1.38(1.05,1.81)  | 0.022   | 1.55(1.19,2.02)                                                                    | 0.001   | 1.76(1.40,2.20)                     | <0.001  | 1.70(1.25,2.31)                              | 0.001   |
| Thyroid                                              | clarithromycin      | 2.10(1.28,3.46)            | 0.003   | 1.82(1.06,3.10)  | 0.029   | 2.14(1.30,3.52)                                                                    | 0.003   | 1.80(1.13,2.88)                     | 0.014   | 1.70(0.95,3.05)                              | 0.074   |
| Thyroid                                              | flucloxacillin      | 1.70(1.16,2.49)            | 0.006   | 1.84(1.22,2.77)  | 0.004   | 1.64(1.12,2.41)                                                                    | 0.012   | 1.63(1.14,2.32)                     | 0.007   | 1.66(1.06,2.60)                              | 0.027   |
| Thyroid                                              | folic acid §        | 2.77(1.32,5.82)            | 0.007   | 0.66(0.19,2.26)  | 0.506   | 3.02(1.42,6.41)                                                                    | 0.004   | 1.94(1.00,3.78)                     | 0.052   | 2.17(0.91,5.17)                              | 0.080   |
| Thyroid                                              | gabapentin          | 5.84(1.82,18.79)           | 0.003   | 5.17(1.36,19.66) | 0.016   | 5.48(1.71,17.59)                                                                   | 0.004   | 5.03(1.65,15.31)                    | 0.004   | 3.91(0.99,15.44)                             | 0.052   |
| Thyroid                                              | levothyroxine       | 2.21(1.27,3.83)            | 0.005   | 2.57(1.43,4.61)  | 0.002   | 2.27(1.30,3.97)                                                                    | 0.004   | 2.07(1.29,3.32)                     | 0.002   | 2.68(1.41,5.08)                              | 0.003   |
| Thyroid                                              | mefenamic acid      | 2.30(1.25,4.25)            | 0.008   | 2.22(1.19,4.14)  | 0.012   | 2.24(1.21,4.15)                                                                    | 0.010   | 1.69(0.96,2.99)                     | 0.068   | 1.98(0.98,4.01)                              | 0.059   |
| Anal                                                 | clonidine           | 4.49(1.61,12.50)           | 0.004   | 5.39(1.82,16.02) | 0.002   | 6.44(2.12,19.56)                                                                   | 0.001   | 4.44(1.73,11.42)                    | 0.002   | 7.33(2.17,24.82)                             | 0.001   |
| Anal                                                 | doxazosin           | 2.76(1.34,5.71)            | 0.006   | 3.01(1.37,6.59)  | 0.006   | 2.56(1.18,5.53)                                                                    | 0.017   | 2.56(1.30,5.03)                     | 0.006   | 3.03(1.27,7.24)                              | 0.013   |
| Anal                                                 | theophylline        | 9.08(1.78,46.43)           | 0.008   | 5.65(1.04,30.59) | 0.044   | 2.19(0.36,13.30)                                                                   | 0.394   | 4.36(1.19,15.89)                    | 0.026   | 8.67(1.24,60.81)                             | 0.030   |
| <b>Signals associated with decreased cancer risk</b> |                     |                            |         |                  |         |                                                                                    |         |                                     |         |                                              |         |
| Breast §                                             | trazodone           | 0.74(0.62,0.89)            | 0.001   | 0.76(0.62,0.93)  | 0.009   | 0.75(0.62,0.89)                                                                    | 0.002   | 0.79(0.67,0.93)                     | 0.005   | 0.75(0.62,0.92)                              | 0.005   |
| Lung                                                 | fluocinolone*       | 0.65(0.48,0.89)            | 0.007   | 0.65(0.47,0.91)  | 0.013   | 0.66(0.49,0.90)                                                                    | 0.009   | 0.68(0.51,0.91)                     | 0.009   | 0.66(0.47,0.92)                              | 0.015   |
| Colorectal                                           | metoclopramide      | 0.77(0.65,0.91)            | 0.002   | 0.75(0.63,0.90)  | 0.002   | 0.79(0.67,0.92)                                                                    | 0.004   | 0.78(0.67,0.91)                     | 0.001   | 0.78(0.65,0.93)                              | 0.005   |

**Table S6 (cont)**

| Cancer                        | Medicine             | 1 year lag (main analysis) |         | 2 year lag      |         | Exclude matched sets where cases have additional cancer diagnosis within 12 months |         | 1 year lag with multiple imputation |         | Adjusted for comorbidities smoking & alcohol |         |
|-------------------------------|----------------------|----------------------------|---------|-----------------|---------|------------------------------------------------------------------------------------|---------|-------------------------------------|---------|----------------------------------------------|---------|
|                               |                      | OR (95%CI)                 | p-value | OR (95%CI)      | p-value | OR (95%CI)                                                                         | p-value | OR (95%CI)                          | p-value | OR (95%CI)                                   | p-value |
| Colorectal                    | nitrofurantoin       | 0.66(0.51,0.87)            | 0.003   | 0.50(0.36,0.69) | <0.001  | 0.66(0.50,0.86)                                                                    | 0.002   | 0.71(0.56,0.90)                     | 0.005   | 0.65(0.48,0.86)                              | 0.003   |
| Prostate §§                   | levodopa             | 0.44(0.26,0.75)            | 0.003   | 0.55(0.30,1.00) | 0.048   | 0.44(0.26,0.75)                                                                    | 0.003   | 0.47(0.30,0.73)                     | 0.001   | 0.44(0.25,0.80)                              | 0.007   |
| Prostate §§                   | risperidone          | 0.38(0.18,0.78)            | 0.009   | 0.61(0.29,1.29) | 0.195   | 0.38(0.18,0.78)                                                                    | 0.009   | 0.37(0.20,0.70)                     | 0.002   | 0.44(0.20,0.96)                              | 0.039   |
| Prostate §§                   | senna                | 0.77(0.66,0.90)            | 0.001   | 0.77(0.64,0.92) | 0.004   | 0.77(0.66,0.90)                                                                    | 0.001   | 0.76(0.66,0.87)                     | <0.001  | 0.78(0.65,0.92)                              | 0.004   |
| Bladder                       | sotalol              | 0.19(0.07,0.52)            | 0.001   | 0.20(0.07,0.55) | 0.002   | 0.16(0.05,0.51)                                                                    | 0.002   | 0.25(0.11,0.55)                     | 0.001   | 0.13(0.04,0.44)                              | 0.001   |
| Malignant melanoma            | gliclazide           | 0.49(0.30,0.80)            | 0.005   | 0.39(0.22,0.69) | 0.001   | 0.50(0.30,0.82)                                                                    | 0.007   | 0.50(0.32,0.79)                     | 0.003   | 0.41(0.24,0.69)                              | 0.001   |
| Oesophagus                    | diazepam             | 0.73(0.58,0.91)            | 0.005   | 0.73(0.57,0.93) | 0.012   | 0.73(0.58,0.91)                                                                    | 0.005   | 0.77(0.63,0.95)                     | 0.013   | 0.77(0.60,0.97)                              | 0.030   |
| Oesophagus                    | estrogen (HRT) §     | 0.61(0.44,0.84)            | 0.003   | 0.59(0.42,0.83) | 0.003   | 0.62(0.44,0.86)                                                                    | 0.004   | 0.61(0.45,0.82)                     | 0.001   | 0.56(0.39,0.81)                              | 0.002   |
| Non-Hodgkin's lymphoma        | progestogen (cont) § | 0.49(0.30,0.81)            | 0.005   | 0.41(0.24,0.71) | 0.001   | 0.47(0.28,0.78)                                                                    | 0.003   | 0.56(0.36,0.86)                     | 0.008   | 0.54(0.32,0.93)                              | 0.027   |
| Oral (inc. Head,neck & nasal) | doxycycline          | 0.43(0.28,0.67)            | <0.001  | 0.43(0.27,0.69) | 0.001   | 0.41(0.26,0.64)                                                                    | <0.001  | 0.46(0.31,0.68)                     | <0.001  | 0.40(0.24,0.66)                              | <0.001  |
| Ovary §                       | progestogen (cont)   | 0.56(0.38,0.81)            | 0.003   | 0.51(0.34,0.76) | 0.001   | 0.56(0.38,0.82)                                                                    | 0.003   | 0.55(0.39,0.78)                     | 0.001   | 0.47(0.30,0.72)                              | 0.001   |
| Cervix & other gynae §        | terbinafine          | 0.20(0.07,0.54)            | 0.002   | 0.18(0.05,0.58) | 0.004   | 0.21(0.07,0.58)                                                                    | 0.003   | 0.17(0.06,0.48)                     | 0.001   | 0.19(0.07,0.54)                              | 0.002   |
| Uterus §                      | progestogen (cont)   | 0.37(0.19,0.71)            | 0.003   | 0.38(0.19,0.74) | 0.005   | 0.38(0.20,0.73)                                                                    | 0.004   | 0.35(0.19,0.67)                     | 0.001   | 0.40(0.20,0.80)                              | 0.010   |

† comorbidities include diabetes, myocardial infarction, coronary heart disease, heart failure, peripheral vascular disease, dementia, cerebrovascular disease, chronic obstructive pulmonary disease, osteoporosis, rheumatological disease, renal disease, liver disease, irritable bowel disease, human immunodeficiency viruses and hemiplegia/paraplegia, plus potential site-specific confounders; OR odds ratio; CI confidence interval; CNS: central nervous system; medicines systemic unless otherwise indicated\* (local); HRT: hormone replacement therapy; § females only; §§ males only

**Table S7: Sensitivity analyses for comorbidity<sup>†</sup> adjusted signals: exposure >=6 prescriptions**

| Cancer                                               | Medicine        | 1 year lag (main analysis) |         | 2 year lag      |         | Exclude matched sets where cases have additional cancer diagnosis within 12 months |         | Adjusted for comorbidities, smoking & alcohol |         |
|------------------------------------------------------|-----------------|----------------------------|---------|-----------------|---------|------------------------------------------------------------------------------------|---------|-----------------------------------------------|---------|
|                                                      |                 | OR (95%CI)                 | p-value | OR (95%CI)      | p-value | OR (95%CI)                                                                         | p-value | OR (95%CI)                                    | p-value |
| <b>Signals associated with increased cancer risk</b> |                 |                            |         |                 |         |                                                                                    |         |                                               |         |
| Breast §                                             | estrogen-HRT    | 1.36(1.27,1.45)            | <0.001  | 1.31(1.22,1.41) | <0.001  | 1.35(1.26,1.45)                                                                    | <0.001  | 1.32(1.21,1.43)                               | <0.001  |
| Breast §                                             | metronidazole*  | 2.21(1.21,4.03)            | 0.010   | 2.86(1.47,5.56) | 0.002   | 2.21(1.21,4.03)                                                                    | 0.010   | 2.10(1.04,4.24)                               | 0.038   |
| Breast §                                             | progestogen-HRT | 1.50(1.40,1.62)            | <0.001  | 1.47(1.36,1.59) | <0.001  | 1.50(1.39,1.61)                                                                    | <0.001  | 1.47(1.34,1.61)                               | <0.001  |
| Lung                                                 | amitriptyline   | 1.27(1.13,1.43)            | <0.001  | 1.24(1.09,1.40) | 0.001   | 1.28(1.14,1.45)                                                                    | <0.001  | 1.25(1.08,1.46)                               | 0.003   |
| Lung                                                 | amoxicillin     | 1.44(1.30,1.60)            | <0.001  | 1.45(1.29,1.63) | <0.001  | 1.44(1.30,1.60)                                                                    | <0.001  | 1.38(1.22,1.58)                               | <0.001  |
| Lung                                                 | azathioprine    | 1.88(1.30,2.70)            | 0.001   | 1.75(1.18,2.59) | 0.005   | 1.85(1.28,2.67)                                                                    | 0.001   | 2.42(1.51,3.87)                               | <0.001  |
| Lung                                                 | cimetidine      | 1.46(1.29,1.66)            | <0.001  | 1.45(1.28,1.65) | <0.001  | 1.48(1.31,1.67)                                                                    | <0.001  | 1.40(1.19,1.65)                               | <0.001  |
| Lung                                                 | diazepam        | 1.29(1.11,1.50)            | 0.001   | 1.35(1.15,1.58) | <0.001  | 1.29(1.11,1.50)                                                                    | 0.001   | 1.04(0.85,1.27)                               | 0.698   |
| Lung                                                 | dihydrocodeine  | 1.40(1.27,1.54)            | <0.001  | 1.42(1.28,1.57) | <0.001  | 1.40(1.27,1.54)                                                                    | <0.001  | 1.26(1.11,1.43)                               | <0.001  |
| Lung                                                 | folic acid §    | 1.50(1.21,1.86)            | <0.001  | 1.58(1.24,2.01) | <0.001  | 1.51(1.21,1.88)                                                                    | <0.001  | 1.41(1.06,1.88)                               | 0.018   |
| Lung                                                 | ipratropium*    | 1.63(1.45,1.84)            | <0.001  | 1.58(1.39,1.80) | <0.001  | 1.65(1.46,1.86)                                                                    | <0.001  | 1.56(1.33,1.83)                               | <0.001  |
| Lung                                                 | nitrazepam      | 1.49(1.21,1.84)            | <0.001  | 1.48(1.19,1.84) | <0.001  | 1.48(1.20,1.82)                                                                    | <0.001  | 1.89(1.40,2.56)                               | <0.001  |
| Lung                                                 | quinine         | 1.25(1.10,1.42)            | 0.001   | 1.22(1.06,1.40) | 0.005   | 1.25(1.10,1.42)                                                                    | <0.001  | 1.35(1.14,1.59)                               | <0.001  |
| Lung                                                 | salbutamol*     | 1.41(1.30,1.53)            | <0.001  | 1.36(1.24,1.48) | <0.001  | 1.42(1.31,1.54)                                                                    | <0.001  | 1.39(1.24,1.55)                               | <0.001  |
| Lung                                                 | salmeterol*     | 1.37(1.22,1.53)            | <0.001  | 1.25(1.10,1.42) | 0.001   | 1.37(1.22,1.54)                                                                    | <0.001  | 1.42(1.23,1.65)                               | <0.001  |
| Lung                                                 | temazepam       | 1.33(1.15,1.54)            | <0.001  | 1.37(1.17,1.59) | <0.001  | 1.33(1.15,1.54)                                                                    | <0.001  | 1.27(1.04,1.55)                               | 0.018   |
| Lung                                                 | tiotropium*     | 1.64(1.37,1.97)            | <0.001  | 1.59(1.27,1.99) | <0.001  | 1.66(1.39,1.99)                                                                    | <0.001  | 1.54(1.24,1.91)                               | <0.001  |
| Lung                                                 | vitamin D*      | 1.45(1.10,1.91)            | 0.009   | 1.33(0.98,1.80) | 0.065   | 1.45(1.10,1.92)                                                                    | 0.008   | 1.14(0.79,1.66)                               | 0.477   |
| Colorectal                                           | allopurinol     | 1.35(1.16,1.57)            | <0.001  | 1.37(1.17,1.61) | <0.001  | 1.31(1.12,1.53)                                                                    | 0.001   | 1.33(1.10,1.60)                               | 0.004   |
| Colorectal                                           | aminophylline   | 1.93(1.31,2.83)            | 0.001   | 2.07(1.38,3.11) | <0.001  | 1.93(1.31,2.83)                                                                    | 0.001   | 2.38(1.40,4.05)                               | 0.001   |
| Colorectal                                           | bisacodyl       | 1.79(1.24,2.59)            | 0.002   | 1.94(1.30,2.89) | 0.001   | 1.84(1.27,2.66)                                                                    | 0.001   | 1.79(1.08,2.96)                               | 0.023   |
| Colorectal                                           | dipyridamole    | 1.45(1.17,1.80)            | 0.001   | 1.54(1.22,1.95) | <0.001  | 1.46(1.18,1.81)                                                                    | 0.001   | 1.40(1.06,1.83)                               | 0.016   |
| Colorectal                                           | mesalazine      | 1.65(1.18,2.30)            | 0.003   | 1.88(1.31,2.69) | 0.001   | 1.66(1.18,2.33)                                                                    | 0.003   | 1.51(0.96,2.37)                               | 0.071   |
| Colorectal                                           | perindopril     | 1.31(1.10,1.56)            | 0.003   | 1.31(1.07,1.60) | 0.009   | 1.30(1.09,1.56)                                                                    | 0.004   | 1.31(1.06,1.61)                               | 0.011   |
| Colorectal                                           | phenytoin       | 1.58(1.12,2.22)            | 0.009   | 1.56(1.09,2.22) | 0.014   | 1.52(1.07,2.16)                                                                    | 0.018   | 1.63(1.01,2.61)                               | 0.044   |
| Prostate §§                                          | cerivastatin    | 1.59(1.16,2.20)            | 0.004   | 1.57(1.12,2.21) | 0.010   | 1.58(1.14,2.19)                                                                    | 0.006   | 1.60(1.08,2.36)                               | 0.019   |
| Prostate §§                                          | clioquinol*     | 2.06(1.24,3.42)            | 0.005   | 2.35(1.36,4.04) | 0.002   | 2.06(1.24,3.42)                                                                    | 0.005   | 1.94(1.06,3.56)                               | 0.032   |
| Bladder                                              | amoxicillin     | 1.39(1.13,1.72)            | 0.002   | 1.41(1.11,1.80) | 0.005   | 1.39(1.12,1.71)                                                                    | 0.002   | 1.34(1.05,1.70)                               | 0.019   |
| Bladder                                              | nicotine        | 2.59(1.38,4.85)            | 0.003   | 2.43(1.13,5.23) | 0.023   | 2.43(1.28,4.63)                                                                    | 0.007   | 2.30(1.16,4.56)                               | 0.017   |
| Bladder                                              | trimethoprim    | 1.80(1.25,2.58)            | 0.001   | 1.49(0.97,2.29) | 0.066   | 1.83(1.27,2.65)                                                                    | 0.001   | 2.12(1.41,3.20)                               | <0.001  |
| Malignant melanoma                                   | clopidogrel     | 1.86(1.21,2.88)            | 0.005   | 1.83(1.10,3.05) | 0.020   | 1.80(1.15,2.81)                                                                    | 0.010   | 1.78(1.08,2.93)                               | 0.024   |
| Oesophagus                                           | alginate acid   | 1.52(1.26,1.84)            | <0.001  | 1.52(1.25,1.86) | <0.001  | 1.54(1.27,1.86)                                                                    | <0.001  | 1.51(1.17,1.94)                               | 0.001   |
| Oesophagus                                           | beclometasone*  | 1.37(1.14,1.65)            | 0.001   | 1.31(1.08,1.60) | 0.007   | 1.37(1.13,1.66)                                                                    | 0.001   | 1.34(1.06,1.70)                               | 0.016   |
| Oesophagus                                           | cisapride       | 2.89(1.41,5.92)            | 0.004   | 2.54(1.18,5.46) | 0.017   | 2.90(1.42,5.95)                                                                    | 0.004   | 2.91(1.10,7.70)                               | 0.031   |
| Oesophagus                                           | lansoprazole    | 1.67(1.39,2.01)            | <0.001  | 1.69(1.38,2.06) | <0.001  | 1.65(1.37,1.99)                                                                    | <0.001  | 1.52(1.21,1.91)                               | <0.001  |
| Oesophagus                                           | omeprazole      | 1.45(1.24,1.69)            | <0.001  | 1.50(1.27,1.78) | <0.001  | 1.45(1.24,1.70)                                                                    | <0.001  | 1.41(1.15,1.72)                               | 0.001   |

Table S7 (cont)

| Cancer                        | Medicine                | 1 year lag (main analysis) |         | 2 year lag         |         | Exclude matched sets where cases have additional cancer diagnosis within 12 months |         | Adjusted for comorbidities, smoking & alcohol |         |
|-------------------------------|-------------------------|----------------------------|---------|--------------------|---------|------------------------------------------------------------------------------------|---------|-----------------------------------------------|---------|
|                               |                         | OR (95%CI)                 | p-value | OR (95%CI)         | p-value | OR (95%CI)                                                                         | p-value | OR (95%CI)                                    | p-value |
| Oesophagus                    | risedronate sodium      | 2.54(1.27,5.05)            | 0.008   | 2.46(1.12,5.39)    | 0.025   | 2.43(1.20,4.90)                                                                    | 0.013   | 2.67(1.16,6.18)                               | 0.021   |
| Oesophagus                    | vitamin B               | 1.54(1.18,2.01)            | 0.001   | 1.65(1.24,2.20)    | 0.001   | 1.58(1.21,2.06)                                                                    | 0.001   | 1.33(0.94,1.87)                               | 0.108   |
| Oesophagus                    | warfarin                | 1.43(1.11,1.84)            | 0.005   | 1.41(1.07,1.85)    | 0.014   | 1.43(1.11,1.84)                                                                    | 0.006   | 1.52(1.10,2.09)                               | 0.010   |
| Non-Hodgkin's lymphoma        | amoxicillin             | 1.46(1.12,1.92)            | 0.006   | 1.70(1.25,2.32)    | 0.001   | 1.52(1.15,2.00)                                                                    | 0.003   | 1.40(1.02,1.93)                               | 0.039   |
| Non-Hodgkin's lymphoma        | azathioprine            | 2.58(1.31,5.08)            | 0.006   | 2.57(1.28,5.18)    | 0.008   | 2.66(1.35,5.25)                                                                    | 0.005   | 2.42(0.99,5.93)                               | 0.053   |
| Non-Hodgkin's lymphoma        | gabapentin              | 2.86(1.47,5.58)            | 0.002   | 2.14(0.94,4.90)    | 0.070   | 2.97(1.51,5.81)                                                                    | 0.002   | 4.28(1.87,9.81)                               | 0.001   |
| Non-Hodgkin's lymphoma        | methotrexate            | 3.41(1.57,7.41)            | 0.002   | 3.60(1.54,8.43)    | 0.003   | 3.41(1.57,7.43)                                                                    | 0.002   | 3.26(1.20,8.82)                               | 0.020   |
| Non-Hodgkin's lymphoma        | phenoxymethylpenicillin | 3.77(1.51,9.45)            | 0.005   | 4.09(1.47,11.39)   | 0.007   | 3.77(1.51,9.45)                                                                    | 0.005   | 3.39(0.93,12.37)                              | 0.064   |
| Leukaemia                     | allopurinol             | 1.68(1.24,2.27)            | 0.001   | 1.57(1.12,2.19)    | 0.009   | 1.65(1.21,2.24)                                                                    | 0.002   | 1.83(1.24,2.69)                               | 0.002   |
| Leukaemia                     | oxybutynin              | 2.35(1.41,3.92)            | 0.001   | 2.25(1.29,3.94)    | 0.004   | 2.35(1.41,3.93)                                                                    | 0.001   | 2.68(1.30,5.52)                               | 0.007   |
| Leukaemia                     | oxytetracycline         | 2.67(1.49,4.79)            | 0.001   | 3.19(1.74,5.84)    | <0.001  | 2.52(1.39,4.56)                                                                    | 0.002   | 2.74(1.25,5.97)                               | 0.011   |
| Leukaemia                     | paracetamol             | 1.26(1.10,1.44)            | 0.001   | 1.22(1.05,1.41)    | 0.007   | 1.26(1.10,1.45)                                                                    | 0.001   | 1.36(1.13,1.63)                               | 0.001   |
| Oral (inc. Head,neck & nasal) | betamethasone*          | 1.69(1.15,2.48)            | 0.007   | 1.63(1.07,2.48)    | 0.023   | 1.75(1.19,2.58)                                                                    | 0.005   | 2.13(1.30,3.48)                               | 0.003   |
| Oral (inc. Head,neck & nasal) | folic acid §            | 3.79(2.09,6.89)            | <0.001  | 2.78(1.43,5.38)    | 0.002   | 3.66(1.99,6.72)                                                                    | <0.001  | 3.55(1.51,8.33)                               | 0.004   |
| Oral (inc. Head,neck & nasal) | vitamin A               | 3.84(1.68,8.79)            | 0.001   | 2.90(1.10,7.63)    | 0.031   | 3.83(1.67,8.79)                                                                    | 0.002   | 3.81(1.25,11.55)                              | 0.018   |
| Oral (inc. Head,neck & nasal) | vitamin B               | 3.09(2.31,4.14)            | <0.001  | 3.08(2.23,4.25)    | <0.001  | 3.12(2.32,4.21)                                                                    | <0.001  | 2.07(1.40,3.06)                               | <0.001  |
| Oral (inc. Head,neck & nasal) | vitamin C               | 4.43(2.05,9.56)            | <0.001  | 2.63(1.03,6.74)    | 0.044   | 4.72(2.14,10.38)                                                                   | <0.001  | 3.73(1.29,10.81)                              | 0.015   |
| Stomach                       | cimetidine              | 1.52(1.11,2.07)            | 0.008   | 1.46(1.06,2.03)    | 0.022   | 1.55(1.13,2.13)                                                                    | 0.007   | 2.35(0.72,7.69)                               | 0.157   |
| Ovary §                       | cyclopenthiazide        | 3.31(1.54,7.15)            | 0.002   | 3.77(1.70,8.36)    | 0.001   | 3.33(1.54,7.18)                                                                    | 0.002   | 4.36(1.51,12.59)                              | 0.006   |
| Ovary §                       | phenytoin               | 3.87(1.83,8.18)            | <0.001  | 3.48(1.62,7.47)    | 0.001   | 3.90(1.85,8.24)                                                                    | <0.001  | 3.02(1.30,7.06)                               | 0.011   |
| Ovary §                       | vitamin D*              | 2.66(1.30,5.45)            | 0.007   | 3.47(1.55,7.78)    | 0.002   | 2.84(1.38,5.85)                                                                    | 0.005   | 1.19(0.78,1.80)                               | 0.425   |
| Kidney                        | hydrochlorothiazide     | 2.26(1.46,3.48)            | <0.001  | 2.55(1.63,4.00)    | <0.001  | 2.34(1.51,3.61)                                                                    | <0.001  | 2.28(1.35,3.85)                               | 0.002   |
| Kidney                        | nystatin*               | 2.25(1.23,4.13)            | 0.009   | 2.45(1.30,4.62)    | 0.006   | 2.25(1.22,4.13)                                                                    | 0.009   | 1.76(0.86,3.61)                               | 0.123   |
| Kidney                        | perindopril             | 1.87(1.25,2.81)            | 0.003   | 1.98(1.26,3.13)    | 0.003   | 2.00(1.32,3.03)                                                                    | 0.001   | 1.74(1.09,2.77)                               | 0.020   |
| Pancreas                      | clopidogrel             | 2.14(1.34,3.42)            | 0.001   | 1.81(1.05,3.10)    | 0.032   | 2.07(1.29,3.33)                                                                    | 0.003   | 1.75(0.95,3.24)                               | 0.075   |
| Pancreas                      | hydrochlorothiazide     | 1.84(1.16,2.90)            | 0.009   | 1.72(1.08,2.75)    | 0.023   | 1.71(1.07,2.73)                                                                    | 0.025   | 2.49(1.45,4.30)                               | 0.001   |
| Pancreas                      | metoclopramide          | 3.08(1.40,6.76)            | 0.005   | 3.43(1.49,7.88)    | 0.004   | 3.04(1.38,6.70)                                                                    | 0.006   | 1.95(1.11,3.44)                               | 0.021   |
| Pancreas                      | nicotine                | 3.61(1.55,8.43)            | 0.003   | 3.38(1.12,10.22)   | 0.031   | 4.46(1.84,10.79)                                                                   | 0.001   | 2.24(0.84,5.97)                               | 0.107   |
| Cervix & other gynae §        | cimetidine              | 1.87(1.17,2.98)            | 0.009   | 1.98(1.21,3.23)    | 0.007   | 1.79(1.10,2.92)                                                                    | 0.020   | 1.92(0.74,5.00)                               | 0.183   |
| Uterus §                      | atenolol                | 1.40(1.14,1.71)            | 0.001   | 1.42(1.15,1.75)    | 0.001   | 1.43(1.17,1.75)                                                                    | 0.001   | 1.29(1.01,1.65)                               | 0.044   |
| Uterus §                      | bendroflumethiazide     | 1.33(1.10,1.61)            | 0.003   | 1.35(1.11,1.65)    | 0.003   | 1.34(1.10,1.62)                                                                    | 0.003   | 1.33(1.06,1.68)                               | 0.015   |
| Uterus §                      | bismuth*                | 6.56(1.64,26.17)           | 0.008   | 17.32(1.54,194.62) | 0.021   | 6.73(1.69,26.90)                                                                   | 0.007   | 6.83(1.12,41.51)                              | 0.037   |
| Uterus §                      | dextropropoxyphene      | 1.43(1.11,1.83)            | 0.005   | 1.41(1.09,1.83)    | 0.010   | 1.38(1.07,1.78)                                                                    | 0.013   | 1.37(0.99,1.89)                               | 0.057   |
| Uterus §                      | doxazosin               | 2.21(1.43,3.43)            | <0.001  | 2.22(1.37,3.61)    | 0.001   | 2.26(1.45,3.53)                                                                    | <0.001  | 1.91(1.14,3.19)                               | 0.014   |
| Uterus §                      | enalapril               | 1.78(1.21,2.62)            | 0.003   | 2.02(1.35,3.01)    | 0.001   | 1.89(1.28,2.79)                                                                    | 0.001   | 2.49(1.54,4.03)                               | <0.001  |



Table S7 (cont)

| Cancer                                               | Medicine           | 1 year lag (main analysis) |         | 2 year lag         |         | Exclude matched sets where cases have additional cancer diagnosis within 12 months |         | Adjusted for comorbidities, smoking & alcohol |         |
|------------------------------------------------------|--------------------|----------------------------|---------|--------------------|---------|------------------------------------------------------------------------------------|---------|-----------------------------------------------|---------|
|                                                      |                    | OR (95%CI)                 | p-value | OR (95%CI)         | p-value | OR (95%CI)                                                                         | p-value | OR (95%CI)                                    | p-value |
| Uterus §                                             | losartan potassium | 2.00(1.24,3.23)            | 0.005   | 2.17(1.28,3.68)    | 0.004   | 2.01(1.24,3.25)                                                                    | 0.004   | 2.06(1.18,3.59)                               | 0.011   |
| Uterus §                                             | peru balsam*       | 6.56(1.64,26.17)           | 0.008   | 17.32(1.54,194.62) | 0.021   | 6.73(1.69,26.90)                                                                   | 0.007   | 6.83(1.12,41.51)                              | 0.037   |
| Uterus §                                             | salicylic acid*    | 4.31(1.53,12.08)           | 0.006   | 8.12(2.44,26.96)   | 0.001   | 4.31(1.53,12.09)                                                                   | 0.006   | 7.75(2.20,27.28)                              | 0.001   |
| Larynx                                               | cimetidine         | 2.12(1.36,3.32)            | 0.001   | 2.32(1.46,3.70)    | <0.001  | 2.06(1.30,3.27)                                                                    | 0.002   | 1.87(0.81,4.32)                               | 0.143   |
| Larynx                                               | vitamin B          | 2.20(1.41,3.41)            | <0.001  | 2.16(1.33,3.51)    | 0.002   | 2.30(1.46,3.62)                                                                    | <0.001  | 2.43(1.28,4.61)                               | 0.007   |
| Brain and CNS                                        | carbamazepine      | 3.02(1.59,5.71)            | 0.001   | 2.80(1.43,5.48)    | 0.003   | 3.21(1.68,6.12)                                                                    | <0.001  | 1.23(0.67,2.24)                               | 0.504   |
| Myeloma                                              | mometasone*        | 3.45(1.40,8.50)            | 0.007   | 3.26(1.18,8.99)    | 0.023   | 4.02(1.61,10.09)                                                                   | 0.003   | 2.54(0.70,9.16)                               | 0.155   |
| Liver                                                | furosemide         | 1.98(1.35,2.91)            | 0.001   | 1.91(1.28,2.85)    | 0.002   | 2.08(1.41,3.07)                                                                    | <0.001  | 2.46(1.48,4.10)                               | 0.001   |
| Liver                                                | mometasone*        | 3.82(1.42,10.26)           | 0.008   | 2.92(1.00,8.53)    | 0.050   | 3.82(1.42,10.27)                                                                   | 0.008   | 3.12(1.01,9.68)                               | 0.049   |
| Liver                                                | pravastatin        | 2.26(1.24,4.11)            | 0.008   | 2.14(1.11,4.12)    | 0.023   | 2.26(1.24,4.13)                                                                    | 0.008   | 2.08(1.05,4.12)                               | 0.036   |
| Thyroid                                              | levothyroxine      | 2.30(1.40,3.76)            | 0.001   | 2.42(1.42,4.12)    | 0.001   | 2.40(1.46,3.96)                                                                    | 0.001   | 2.46(1.26,4.80)                               | 0.008   |
| Thyroid                                              | progestogen-HRT §  | 2.52(1.33,4.78)            | 0.005   | 2.32(1.15,4.65)    | 0.018   | 2.52(1.33,4.78)                                                                    | 0.005   | 1.99(0.88,4.54)                               | 0.100   |
| Anal                                                 | doxazosin          | 3.19(1.44,7.06)            | 0.004   | 2.98(1.22,7.30)    | 0.017   | 3.13(1.37,7.17)                                                                    | 0.007   | 2.74(1.01,7.39)                               | 0.047   |
| Anal                                                 | nicotine           | 9.95(2.22,44.53)           | 0.003   | 5.43(0.70,42.17)   | 0.106   | 9.34(1.86,46.78)                                                                   | 0.007   | 5.79(0.93,35.94)                              | 0.059   |
| <b>Signals associated with decreased cancer risk</b> |                    |                            |         |                    |         |                                                                                    |         |                                               |         |
| Breast §                                             | carbamazepine      | 0.70(0.55,0.90)            | 0.005   | 0.66(0.50,0.86)    | 0.003   | 0.71(0.56,0.91)                                                                    | 0.007   | 0.81(0.60,1.10)                               | 0.172   |
| Breast §                                             | iron               | 0.78(0.67,0.92)            | 0.003   | 0.72(0.60,0.87)    | <0.001  | 0.78(0.66,0.92)                                                                    | 0.003   | 0.72(0.59,0.89)                               | 0.002   |
| Breast §                                             | prednisolone       | 0.78(0.66,0.92)            | 0.004   | 0.78(0.65,0.95)    | 0.012   | 0.78(0.66,0.93)                                                                    | 0.006   | 0.82(0.66,1.01)                               | 0.061   |
| Breast §                                             | trimethoprim       | 0.72(0.57,0.91)            | 0.005   | 0.78(0.60,1.02)    | 0.069   | 0.72(0.57,0.91)                                                                    | 0.006   | 0.71(0.54,0.92)                               | 0.011   |
| Lung                                                 | benzalkonium*      | 0.49(0.29,0.83)            | 0.008   | 0.45(0.24,0.82)    | 0.009   | 0.51(0.30,0.86)                                                                    | 0.012   | 0.62(0.31,1.24)                               | 0.174   |
| Lung                                                 | dimeticone*        | 0.46(0.27,0.80)            | 0.005   | 0.41(0.22,0.77)    | 0.006   | 0.48(0.28,0.82)                                                                    | 0.008   | 0.56(0.27,1.15)                               | 0.112   |
| Lung                                                 | levodopa           | 0.38(0.24,0.61)            | <0.001  | 0.32(0.18,0.56)    | <0.001  | 0.36(0.22,0.58)                                                                    | <0.001  | 0.47(0.26,0.85)                               | 0.013   |
| Colorectal                                           | diclofenac         | 0.71(0.63,0.80)            | <0.001  | 0.71(0.62,0.81)    | <0.001  | 0.71(0.63,0.81)                                                                    | <0.001  | 0.68(0.59,0.79)                               | <0.001  |
| Colorectal                                           | lactulose          | 0.78(0.68,0.90)            | 0.001   | 0.77(0.65,0.90)    | 0.001   | 0.78(0.68,0.91)                                                                    | 0.001   | 0.76(0.62,0.92)                               | 0.005   |
| Colorectal                                           | misoprostol        | 0.69(0.53,0.88)            | 0.003   | 0.64(0.49,0.84)    | 0.001   | 0.70(0.54,0.89)                                                                    | 0.005   | 0.56(0.40,0.78)                               | 0.001   |
| Colorectal                                           | naproxen           | 0.72(0.57,0.89)            | 0.003   | 0.66(0.52,0.85)    | 0.001   | 0.73(0.58,0.91)                                                                    | 0.005   | 0.72(0.56,0.94)                               | 0.017   |
| Colorectal                                           | senna              | 0.73(0.60,0.90)            | 0.003   | 0.75(0.60,0.95)    | 0.015   | 0.72(0.59,0.89)                                                                    | 0.002   | 0.77(0.59,1.00)                               | 0.047   |
| Prostate §§                                          | benzalkonium*      | 0.36(0.17,0.77)            | 0.009   | 0.33(0.14,0.79)    | 0.013   | 0.38(0.18,0.82)                                                                    | 0.014   | 0.37(0.14,0.98)                               | 0.044   |
| Prostate §§                                          | bumetanide         | 0.57(0.38,0.86)            | 0.007   | 0.50(0.32,0.78)    | 0.002   | 0.60(0.40,0.90)                                                                    | 0.013   | 0.75(0.46,1.20)                               | 0.227   |
| Prostate §§                                          | citalopram         | 0.59(0.43,0.81)            | 0.001   | 0.57(0.39,0.82)    | 0.002   | 0.58(0.42,0.80)                                                                    | 0.001   | 0.59(0.41,0.86)                               | 0.006   |
| Prostate §§                                          | dimeticone*        | 0.36(0.17,0.77)            | 0.009   | 0.33(0.14,0.79)    | 0.013   | 0.38(0.18,0.82)                                                                    | 0.014   | 0.39(0.15,1.01)                               | 0.053   |
| Prostate §§                                          | furosemide         | 0.70(0.61,0.79)            | <0.001  | 0.68(0.59,0.78)    | <0.001  | 0.70(0.62,0.79)                                                                    | <0.001  | 0.74(0.63,0.87)                               | <0.001  |
| Prostate §§                                          | iron               | 0.72(0.57,0.92)            | 0.008   | 0.64(0.48,0.86)    | 0.003   | 0.71(0.56,0.90)                                                                    | 0.006   | 0.76(0.56,1.04)                               | 0.084   |
| Prostate §§                                          | lactulose          | 0.68(0.57,0.81)            | <0.001  | 0.70(0.57,0.86)    | 0.001   | 0.67(0.56,0.81)                                                                    | <0.001  | 0.70(0.56,0.88)                               | 0.003   |
| Prostate §§                                          | lidocaine*         | 0.35(0.16,0.75)            | 0.007   | 0.37(0.16,0.85)    | 0.019   | 0.35(0.16,0.75)                                                                    | 0.007   | 0.52(0.20,1.31)                               | 0.166   |
| Prostate §§                                          | risperidone        | 0.27(0.11,0.70)            | 0.007   | 0.21(0.06,0.71)    | 0.012   | 0.29(0.11,0.75)                                                                    | 0.011   | 0.31(0.09,1.08)                               | 0.065   |

**Table S7 (cont)**

| Cancer                 | Medicine                  | 1 year lag (main analysis) |         | 2 year lag      |         | Exclude matched sets where cases have additional cancer diagnosis within 12 months |         | Adjusted for comorbidities, smoking & alcohol |         |
|------------------------|---------------------------|----------------------------|---------|-----------------|---------|------------------------------------------------------------------------------------|---------|-----------------------------------------------|---------|
|                        |                           | OR (95%CI)                 | p-value | OR (95%CI)      | p-value | OR (95%CI)                                                                         | p-value | OR (95%CI)                                    | p-value |
| Prostate §§            | senna                     | 0.70(0.55,0.90)            | 0.005   | 0.69(0.52,0.92) | 0.012   | 0.70(0.54,0.90)                                                                    | 0.006   | 0.73(0.54,0.99)                               | 0.046   |
| Prostate §§            | vitamin D                 | 0.66(0.50,0.88)            | 0.004   | 0.66(0.47,0.94) | 0.019   | 0.64(0.48,0.86)                                                                    | 0.003   | 0.62(0.44,0.87)                               | 0.005   |
| Bladder                | iron                      | 0.64(0.47,0.88)            | 0.006   | 0.65(0.46,0.93) | 0.018   | 0.64(0.46,0.87)                                                                    | 0.005   | 0.63(0.42,0.95)                               | 0.028   |
| Bladder                | lactulose                 | 0.73(0.58,0.91)            | 0.006   | 0.70(0.54,0.90) | 0.006   | 0.72(0.57,0.90)                                                                    | 0.005   | 0.81(0.60,1.07)                               | 0.140   |
| Malignant melanoma     | gliclazide                | 0.51(0.31,0.84)            | 0.009   | 0.60(0.36,1.03) | 0.062   | 0.53(0.32,0.88)                                                                    | 0.014   | 0.45(0.25,0.80)                               | 0.007   |
| Non-Hodgkin's lymphoma | vitamin B                 | 0.51(0.34,0.78)            | 0.002   | 0.55(0.35,0.86) | 0.009   | 0.52(0.34,0.79)                                                                    | 0.002   | 0.58(0.34,0.98)                               | 0.041   |
| Ovary §                | nifedipine                | 0.56(0.38,0.83)            | 0.004   | 0.62(0.41,0.93) | 0.021   | 0.57(0.39,0.85)                                                                    | 0.006   | 0.59(0.37,0.96)                               | 0.034   |
| Ovary §                | progestogen-contraceptive | 0.44(0.23,0.81)            | 0.009   | 0.33(0.16,0.69) | 0.003   | 0.46(0.25,0.87)                                                                    | 0.016   | 0.50(0.26,0.99)                               | 0.047   |
| Stomach                | finasteride §§            | 0.41(0.21,0.81)            | 0.010   | 0.32(0.15,0.70) | 0.004   | 0.42(0.21,0.82)                                                                    | 0.012   | 0.43(0.19,0.96)                               | 0.038   |
| Uterus §               | estrogen-HRT              | 0.68(0.53,0.87)            | 0.002   | 0.72(0.56,0.93) | 0.012   | 0.68(0.53,0.88)                                                                    | 0.003   | 0.75(0.56,0.99)                               | 0.045   |
| Larynx                 | diclofenac                | 0.48(0.29,0.78)            | 0.003   | 0.53(0.31,0.90) | 0.019   | 0.49(0.30,0.81)                                                                    | 0.006   | 0.62(0.33,1.15)                               | 0.128   |
| Larynx                 | doxazosin                 | 0.31(0.14,0.71)            | 0.006   | 0.33(0.14,0.80) | 0.014   | 0.31(0.14,0.71)                                                                    | 0.006   | 0.37(0.13,1.06)                               | 0.064   |

† comorbidities include diabetes, myocardial infarction, coronary heart disease, heart failure, peripheral vascular disease, dementia, cerebrovascular disease, chronic obstructive pulmonary disease, osteoporosis, rheumatological disease, renal disease, liver disease, irritable bowel disease, human immunodeficiency viruses and hemiplegia/paraplegia, plus potential site-specific confounders; OR odds ratio; CI confidence interval; CNS: central nervous system; medicines systemic unless otherwise indicated\* (local); HRT: hormone replacement therapy; § females only; §§ males only

**Table S8: Sensitivity analyses for comorbidity<sup>†</sup> & smoking adjusted signals: exposure  $\geq 6$  prescriptions**

| Cancer                                               | Medicine                | 1 year lag (main analysis) |         | 2 year lag       |         | Exclude matched sets where cases have additional cancer diagnosis within 12 months |         | 1 year lag with multiple imputation |         | Adjusted for comorbidities smoking & alcohol |         |
|------------------------------------------------------|-------------------------|----------------------------|---------|------------------|---------|------------------------------------------------------------------------------------|---------|-------------------------------------|---------|----------------------------------------------|---------|
|                                                      |                         | OR (95%CI)                 | p-value | OR (95%CI)       | p-value | OR (95%CI)                                                                         | p-value | OR (95%CI)                          | p-value | OR (95%CI)                                   | p-value |
| <b>Signals associated with increased cancer risk</b> |                         |                            |         |                  |         |                                                                                    |         |                                     |         |                                              |         |
| Breast §                                             | estrogen (HRT)          | 1.32(1.23,1.43)            | <0.001  | 1.30(1.20,1.41)  | <0.001  | 1.32(1.23,1.43)                                                                    | <0.001  | 1.36(1.27,1.45)                     | <0.001  | 1.32(1.21,1.43)                              | <0.001  |
| Breast §                                             | metronidazole*          | 2.36(1.25,4.46)            | 0.008   | 3.46(1.66,7.21)  | 0.001   | 2.36(1.25,4.46)                                                                    | 0.008   | 2.20(1.20,4.01)                     | 0.010   | 2.10(1.04,4.24)                              | 0.038   |
| Breast §                                             | progesterone (HRT)      | 1.48(1.37,1.61)            | <0.001  | 1.45(1.32,1.58)  | <0.001  | 1.48(1.37,1.61)                                                                    | <0.001  | 1.50(1.40,1.62)                     | <0.001  | 1.47(1.34,1.61)                              | <0.001  |
| Lung                                                 | amitriptyline           | 1.25(1.09,1.44)            | 0.001   | 1.22(1.05,1.41)  | 0.010   | 1.27(1.10,1.45)                                                                    | 0.001   | 1.19(1.05,1.35)                     | 0.008   | 1.26(1.08,1.46)                              | 0.003   |
| Lung                                                 | amoxicillin             | 1.36(1.21,1.53)            | <0.001  | 1.38(1.21,1.58)  | <0.001  | 1.36(1.20,1.53)                                                                    | <0.001  | 1.39(1.24,1.56)                     | <0.001  | 1.38(1.21,1.57)                              | <0.001  |
| Lung                                                 | azathioprine            | 2.30(1.49,3.56)            | <0.001  | 2.36(1.45,3.83)  | 0.001   | 2.24(1.44,3.47)                                                                    | <0.001  | 2.11(1.43,3.11)                     | <0.001  | 2.46(1.54,3.96)                              | <0.001  |
| Lung                                                 | cimetidine              | 1.37(1.18,1.58)            | <0.001  | 1.26(1.07,1.47)  | 0.004   | 1.38(1.19,1.60)                                                                    | <0.001  | 1.32(1.16,1.51)                     | <0.001  | 1.41(1.20,1.66)                              | <0.001  |
| Lung                                                 | dihydrocodeine          | 1.28(1.15,1.44)            | <0.001  | 1.30(1.15,1.47)  | <0.001  | 1.28(1.14,1.43)                                                                    | <0.001  | 1.31(1.18,1.45)                     | <0.001  | 1.26(1.11,1.43)                              | <0.001  |
| Lung                                                 | fluticasone*            | 1.41(1.24,1.61)            | <0.001  | 1.35(1.16,1.56)  | <0.001  | 1.42(1.24,1.62)                                                                    | <0.001  | 1.40(1.23,1.58)                     | <0.001  | 1.38(1.19,1.60)                              | <0.001  |
| Lung                                                 | ipratropium*            | 1.56(1.35,1.79)            | <0.001  | 1.55(1.33,1.81)  | <0.001  | 1.59(1.38,1.83)                                                                    | <0.001  | 1.56(1.37,1.77)                     | <0.001  | 1.56(1.33,1.83)                              | <0.001  |
| Lung                                                 | nitrazepam              | 1.58(1.22,2.05)            | 0.001   | 1.66(1.27,2.19)  | <0.001  | 1.58(1.22,2.04)                                                                    | 0.001   | 1.44(1.15,1.81)                     | 0.002   | 1.85(1.36,2.51)                              | <0.001  |
| Lung                                                 | phenoxymethylpenicillin | 2.89(1.52,5.50)            | 0.001   | 2.96(1.47,5.97)  | 0.002   | 2.89(1.52,5.51)                                                                    | 0.001   | 2.05(1.14,3.68)                     | 0.016   | 3.47(1.73,6.99)                              | <0.001  |
| Lung                                                 | quinine                 | 1.31(1.13,1.52)            | <0.001  | 1.32(1.12,1.56)  | 0.001   | 1.32(1.13,1.53)                                                                    | <0.001  | 1.28(1.12,1.47)                     | <0.001  | 1.35(1.14,1.59)                              | <0.001  |
| Lung                                                 | salbutamol*             | 1.36(1.24,1.50)            | <0.001  | 1.30(1.17,1.44)  | <0.001  | 1.37(1.25,1.51)                                                                    | <0.001  | 1.39(1.27,1.52)                     | <0.001  | 1.38(1.24,1.54)                              | <0.001  |
| Lung                                                 | salmeterol*             | 1.51(1.32,1.72)            | <0.001  | 1.38(1.19,1.60)  | <0.001  | 1.52(1.33,1.73)                                                                    | <0.001  | 1.50(1.33,1.70)                     | <0.001  | 1.42(1.23,1.65)                              | <0.001  |
| Lung                                                 | tiotropium*             | 1.52(1.25,1.85)            | <0.001  | 1.44(1.13,1.84)  | 0.003   | 1.54(1.26,1.87)                                                                    | <0.001  | 1.54(1.28,1.87)                     | <0.001  | 1.52(1.22,1.88)                              | <0.001  |
| Colorectal                                           | allopurinol             | 1.33(1.12,1.59)            | 0.001   | 1.34(1.11,1.62)  | 0.003   | 1.29(1.08,1.53)                                                                    | 0.005   | 1.33(1.14,1.55)                     | <0.001  | 1.33(1.10,1.61)                              | 0.004   |
| Colorectal                                           | aminophylline           | 1.89(1.17,3.05)            | 0.009   | 2.07(1.26,3.42)  | 0.004   | 1.88(1.16,3.03)                                                                    | 0.010   | 1.87(1.27,2.75)                     | 0.001   | 2.39(1.40,4.06)                              | 0.001   |
| Colorectal                                           | dipyridamole            | 1.44(1.13,1.83)            | 0.004   | 1.50(1.14,1.97)  | 0.004   | 1.44(1.12,1.83)                                                                    | 0.004   | 1.44(1.16,1.78)                     | 0.001   | 1.40(1.07,1.84)                              | 0.016   |
| Colorectal                                           | tiotropium*             | 1.49(1.11,1.99)            | 0.007   | 1.21(0.83,1.77)  | 0.314   | 1.51(1.13,2.03)                                                                    | 0.005   | 1.34(1.01,1.78)                     | 0.040   | 1.43(1.04,1.96)                              | 0.028   |
| Prostate §§                                          | alfuzosin               | 1.63(1.25,2.13)            | <0.001  | 1.55(1.13,2.12)  | 0.006   | 1.55(1.18,2.04)                                                                    | 0.002   | 1.66(1.31,2.10)                     | <0.001  | 1.71(1.28,2.29)                              | <0.001  |
| Prostate §§                                          | atorvastatin            | 1.25(1.11,1.42)            | <0.001  | 1.29(1.12,1.48)  | <0.001  | 1.26(1.11,1.43)                                                                    | <0.001  | 1.25(1.11,1.40)                     | <0.001  | 1.26(1.10,1.44)                              | 0.001   |
| Prostate §§                                          | clioquinol*             | 2.09(1.19,3.66)            | 0.010   | 2.69(1.45,4.99)  | 0.002   | 2.09(1.20,3.67)                                                                    | 0.010   | 2.08(1.25,3.45)                     | 0.005   | 1.94(1.06,3.57)                              | 0.032   |
| Bladder                                              | amoxicillin             | 1.45(1.16,1.81)            | 0.001   | 1.45(1.11,1.87)  | 0.005   | 1.46(1.16,1.83)                                                                    | 0.001   | 1.37(1.12,1.69)                     | 0.003   | 1.33(1.04,1.69)                              | 0.022   |
| Bladder                                              | cefalexin               | 1.99(1.23,3.20)            | 0.005   | 1.95(1.11,3.46)  | 0.021   | 1.97(1.21,3.20)                                                                    | 0.006   | 1.83(1.17,2.88)                     | 0.009   | 1.84(1.07,3.15)                              | 0.027   |
| Bladder                                              | celecoxib               | 1.78(1.20,2.63)            | 0.004   | 1.87(1.20,2.92)  | 0.006   | 1.74(1.17,2.60)                                                                    | 0.007   | 1.59(1.09,2.32)                     | 0.015   | 1.63(1.06,2.50)                              | 0.027   |
| Bladder                                              | ranitidine              | 1.28(1.07,1.54)            | 0.008   | 1.30(1.06,1.59)  | 0.012   | 1.26(1.04,1.52)                                                                    | 0.017   | 1.24(1.05,1.46)                     | 0.010   | 1.36(1.11,1.66)                              | 0.003   |
| Bladder                                              | trimethoprim            | 2.04(1.39,3.00)            | <0.001  | 1.78(1.12,2.84)  | 0.015   | 2.07(1.40,3.06)                                                                    | <0.001  | 1.82(1.27,2.63)                     | 0.001   | 2.14(1.42,3.23)                              | <0.001  |
| Oesophagus                                           | alginate acid           | 1.53(1.22,1.91)            | <0.001  | 1.65(1.29,2.11)  | <0.001  | 1.54(1.22,1.93)                                                                    | <0.001  | 1.53(1.26,1.85)                     | <0.001  | 1.50(1.17,1.93)                              | 0.001   |
| Oesophagus                                           | azathioprine            | 4.15(1.87,9.22)            | <0.001  | 4.41(1.80,10.80) | 0.001   | 4.13(1.86,9.16)                                                                    | <0.001  | 2.86(1.43,5.73)                     | 0.003   | 3.08(1.19,7.97)                              | 0.020   |
| Oesophagus                                           | lansoprazole            | 1.59(1.30,1.95)            | <0.001  | 1.55(1.23,1.95)  | <0.001  | 1.57(1.28,1.93)                                                                    | <0.001  | 1.63(1.36,1.97)                     | <0.001  | 1.54(1.22,1.93)                              | <0.001  |
| Oesophagus                                           | omeprazole              | 1.40(1.17,1.66)            | <0.001  | 1.45(1.19,1.77)  | <0.001  | 1.39(1.16,1.66)                                                                    | <0.001  | 1.46(1.24,1.71)                     | <0.001  | 1.42(1.16,1.73)                              | 0.001   |
| Oesophagus                                           | prednisolone            | 1.68(1.19,2.38)            | 0.003   | 1.50(1.02,2.21)  | 0.037   | 1.69(1.18,2.41)                                                                    | 0.004   | 1.25(0.92,1.71)                     | 0.157   | 1.70(1.16,2.50)                              | 0.007   |
| Oesophagus                                           | risedronate sodium      | 2.69(1.28,5.67)            | 0.009   | 3.11(1.30,7.46)  | 0.011   | 2.53(1.18,5.41)                                                                    | 0.017   | 2.68(1.32,5.41)                     | 0.006   | 2.67(1.16,6.16)                              | 0.021   |

**Table S8 (cont)**

| Cancer                                               | Medicine            | 1 year lag (main analysis) |         | 2 year lag       |         | Exclude matched sets where cases have additional cancer diagnosis within 12 months |         | 1 year lag with multiple imputation |         | Adjusted for comorbidities smoking & alcohol |         |
|------------------------------------------------------|---------------------|----------------------------|---------|------------------|---------|------------------------------------------------------------------------------------|---------|-------------------------------------|---------|----------------------------------------------|---------|
|                                                      |                     | OR (95%CI)                 | p-value | OR (95%CI)       | p-value | OR (95%CI)                                                                         | p-value | OR (95%CI)                          | p-value | OR (95%CI)                                   | p-value |
| Non-Hodgkin's lymphoma                               | amoxicillin         | 1.50(1.13,2.00)            | 0.006   | 1.77(1.28,2.46)  | 0.001   | 1.57(1.17,2.09)                                                                    | 0.002   | 1.45(1.11,1.91)                     | 0.007   | 1.40(1.02,1.93)                              | 0.039   |
| Non-Hodgkin's lymphoma                               | gabapentin          | 3.41(1.67,6.96)            | 0.001   | 2.72(1.13,6.57)  | 0.026   | 3.54(1.72,7.28)                                                                    | 0.001   | 2.83(1.45,5.51)                     | 0.002   | 4.27(1.86,9.78)                              | 0.001   |
| Leukaemia                                            | metoclopramide      | 2.61(1.34,5.11)            | 0.005   | 2.31(1.05,5.08)  | 0.037   | 2.74(1.40,5.40)                                                                    | 0.003   | 2.09(1.15,3.78)                     | 0.015   | 2.48(1.23,5.00)                              | 0.011   |
| Leukaemia                                            | oxybutynin          | 2.69(1.42,5.08)            | 0.002   | 2.50(1.26,4.99)  | 0.009   | 2.67(1.42,5.05)                                                                    | 0.002   | 2.35(1.41,3.93)                     | 0.001   | 2.68(1.30,5.52)                              | 0.007   |
| Leukaemia                                            | oxytetracycline     | 3.01(1.49,6.07)            | 0.002   | 3.05(1.45,6.42)  | 0.003   | 2.83(1.38,5.80)                                                                    | 0.004   | 2.66(1.48,4.78)                     | 0.001   | 2.74(1.25,5.98)                              | 0.011   |
| Leukaemia                                            | paracetamol         | 1.34(1.14,1.57)            | <0.001  | 1.29(1.08,1.54)  | 0.005   | 1.34(1.14,1.58)                                                                    | <0.001  | 1.26(1.10,1.44)                     | 0.001   | 1.36(1.13,1.63)                              | 0.001   |
| Oral (inc. Head,neck & nasal)                        | hydrochlorothiazide | 2.56(1.34,4.89)            | 0.005   | 2.54(1.27,5.09)  | 0.009   | 2.61(1.36,5.00)                                                                    | 0.004   | 2.29(1.29,4.08)                     | 0.005   | 2.45(1.19,5.04)                              | 0.015   |
| Oral (inc. Head,neck & nasal)                        | hydrocortisone*     | 1.66(1.17,2.35)            | 0.004   | 1.38(0.93,2.06)  | 0.113   | 1.66(1.18,2.36)                                                                    | 0.004   | 1.50(1.09,2.06)                     | 0.014   | 1.68(1.14,2.46)                              | 0.009   |
| Oral (inc. Head,neck & nasal)                        | vitamin B           | 2.55(1.79,3.63)            | <0.001  | 2.60(1.76,3.85)  | <0.001  | 2.60(1.81,3.74)                                                                    | <0.001  | 2.60(1.92,3.54)                     | <0.001  | 2.07(1.40,3.07)                              | <0.001  |
| Oral (inc. Head,neck & nasal)                        | vitamin C           | 3.63(1.42,9.25)            | 0.007   | 1.89(0.62,5.83)  | 0.265   | 3.61(1.41,9.25)                                                                    | 0.007   | 3.84(1.73,8.51)                     | 0.001   | 3.74(1.29,10.84)                             | 0.015   |
| Ovary §                                              | phenytoin           | 4.31(1.74,10.65)           | 0.002   | 3.40(1.30,8.89)  | 0.013   | 4.31(1.74,10.66)                                                                   | 0.002   | 3.83(1.81,8.10)                     | <0.001  | 4.34(1.50,12.54)                             | 0.007   |
| Stomach                                              | chlorphenamine      | 4.72(1.64,13.56)           | 0.004   | 3.56(1.19,10.65) | 0.023   | 3.85(1.26,11.75)                                                                   | 0.018   | 2.99(1.25,7.16)                     | 0.014   | 4.51(1.30,15.65)                             | 0.018   |
| Kidney                                               | hydrochlorothiazide | 2.61(1.63,4.18)            | <0.001  | 3.32(2.00,5.53)  | <0.001  | 2.73(1.70,4.40)                                                                    | <0.001  | 2.30(1.49,3.55)                     | <0.001  | 2.29(1.35,3.87)                              | 0.002   |
| Kidney                                               | perindopril         | 1.94(1.25,2.99)            | 0.003   | 2.00(1.22,3.29)  | 0.006   | 2.10(1.35,3.28)                                                                    | 0.001   | 1.88(1.25,2.83)                     | 0.003   | 1.73(1.09,2.76)                              | 0.021   |
| Pancreas                                             | clopidogrel         | 2.37(1.45,3.86)            | 0.001   | 1.86(1.05,3.29)  | 0.033   | 2.27(1.38,3.73)                                                                    | 0.001   | 2.04(1.27,3.27)                     | 0.003   | 2.49(1.44,4.29)                              | 0.001   |
| Pancreas                                             | lorazepam           | 3.59(1.41,9.18)            | 0.008   | 2.74(1.02,7.35)  | 0.046   | 3.58(1.40,9.16)                                                                    | 0.008   | 2.96(1.27,6.92)                     | 0.012   | 4.06(1.32,12.52)                             | 0.015   |
| Pancreas                                             | methotrexate        | 4.39(1.57,12.26)           | 0.005   | 3.93(1.33,11.62) | 0.013   | 4.26(1.52,11.90)                                                                   | 0.006   | 3.23(1.20,8.69)                     | 0.020   | 5.16(1.49,17.95)                             | 0.010   |
| Pancreas                                             | quinine             | 1.78(1.18,2.68)            | 0.006   | 1.51(0.95,2.38)  | 0.079   | 1.71(1.13,2.60)                                                                    | 0.011   | 1.57(1.08,2.27)                     | 0.017   | 1.76(1.11,2.80)                              | 0.016   |
| Uterus §                                             | bendroflumethiazide | 1.32(1.07,1.63)            | 0.009   | 1.29(1.03,1.61)  | 0.027   | 1.32(1.06,1.63)                                                                    | 0.011   | 1.29(1.07,1.57)                     | 0.008   | 1.34(1.06,1.68)                              | 0.014   |
| Uterus §                                             | doxazosin           | 1.88(1.18,3.00)            | 0.008   | 2.11(1.26,3.54)  | 0.005   | 1.84(1.15,2.95)                                                                    | 0.011   | 2.17(1.40,3.36)                     | 0.001   | 1.91(1.15,3.19)                              | 0.013   |
| Uterus §                                             | enalapril           | 2.35(1.53,3.60)            | <0.001  | 2.62(1.69,4.06)  | <0.001  | 2.53(1.64,3.89)                                                                    | <0.001  | 1.78(1.21,2.62)                     | 0.004   | 2.49(1.54,4.02)                              | <0.001  |
| Uterus §                                             | loperamide          | 2.88(1.36,6.09)            | 0.006   | 3.48(1.54,7.91)  | 0.003   | 2.61(1.21,5.64)                                                                    | 0.015   | 2.30(1.16,4.55)                     | 0.017   | 3.09(1.35,7.08)                              | 0.008   |
| Uterus §                                             | salicylic acid*     | 6.85(2.15,21.83)           | 0.001   | 9.95(2.73,36.24) | <0.001  | 6.92(2.16,22.16)                                                                   | 0.001   | 4.33(1.53,12.23)                    | 0.006   | 7.79(2.23,27.23)                             | 0.001   |
| Myeloma                                              | chlortalidone       | 3.06(1.32,7.12)            | 0.009   | 3.26(1.38,7.72)  | 0.007   | 3.00(1.29,6.96)                                                                    | 0.011   | 1.96(0.94,4.08)                     | 0.071   | 3.34(1.28,8.72)                              | 0.014   |
| Liver                                                | furosemide          | 2.48(1.58,3.88)            | <0.001  | 2.45(1.50,4.01)  | <0.001  | 2.57(1.63,4.05)                                                                    | <0.001  | 2.05(1.39,3.02)                     | <0.001  | 2.49(1.50,4.14)                              | <0.001  |
| Thyroid                                              | progestogen (HRT) § | 2.55(1.27,5.11)            | 0.008   | 2.22(1.05,4.68)  | 0.036   | 2.54(1.26,5.09)                                                                    | 0.009   | 2.48(1.30,4.74)                     | 0.006   | 1.97(0.86,4.48)                              | 0.108   |
| Anal                                                 | bisoprolol          | 3.30(1.34,8.14)            | 0.010   | 2.81(1.08,7.34)  | 0.035   | 2.71(1.03,7.17)                                                                    | 0.044   | 2.79(1.18,6.58)                     | 0.019   | 2.41(0.85,6.83)                              | 0.098   |
| Anal                                                 | nicotine            | 8.07(1.69,38.46)           | 0.009   | 4.37(0.53,36.35) | 0.173   | 8.36(1.47,47.39)                                                                   | 0.016   | 7.75(1.70,35.29)                    | 0.008   | 5.80(0.94,35.87)                             | 0.059   |
| <b>Signals associated with decreased cancer risk</b> |                     |                            |         |                  |         |                                                                                    |         |                                     |         |                                              |         |
| Breast §                                             | iron                | 0.72(0.60,0.86)            | <0.001  | 0.67(0.54,0.82)  | <0.001  | 0.72(0.60,0.86)                                                                    | <0.001  | 0.78(0.67,0.92)                     | 0.002   | 0.72(0.59,0.89)                              | 0.002   |
| Breast §                                             | trazodone           | 0.62(0.46,0.85)            | 0.003   | 0.64(0.44,0.91)  | 0.014   | 0.62(0.46,0.85)                                                                    | 0.003   | 0.72(0.55,0.94)                     | 0.016   | 0.66(0.47,0.92)                              | 0.013   |

Table S8 (cont)

| Cancer                 | Medicine          | 1 year lag (main analysis) |         | 2 year lag      |         | Exclude matched sets where cases have additional cancer diagnosis within 12 months |        | 1 year lag with multiple imputation |            | Adjusted for comorbidities smoking & alcohol |            |
|------------------------|-------------------|----------------------------|---------|-----------------|---------|------------------------------------------------------------------------------------|--------|-------------------------------------|------------|----------------------------------------------|------------|
|                        |                   | OR (95%CI)                 | p-value | OR (95%CI)      | p-value | OR (95%CI)                                                                         | cancer | medicine                            | OR (95%CI) | p-value                                      | OR (95%CI) |
| Breast §               | trimethoprim      | 0.71(0.55,0.90)            | 0.005   | 0.75(0.57,1.00) | 0.051   | 0.71(0.55,0.90)                                                                    | 0.006  | 0.72(0.57,0.91)                     | 0.005      | 0.71(0.54,0.92)                              | 0.011      |
| Colorectal             | diclofenac        | 0.72(0.63,0.83)            | <0.001  | 0.71(0.61,0.82) | <0.001  | 0.72(0.63,0.83)                                                                    | <0.001 | 0.71(0.63,0.80)                     | <0.001     | 0.68(0.59,0.79)                              | <0.001     |
| Colorectal             | lactulose         | 0.77(0.65,0.91)            | 0.003   | 0.81(0.67,0.98) | 0.033   | 0.78(0.65,0.92)                                                                    | 0.004  | 0.78(0.68,0.90)                     | 0.001      | 0.76(0.62,0.92)                              | 0.005      |
| Colorectal             | naproxen          | 0.71(0.56,0.91)            | 0.007   | 0.63(0.48,0.84) | 0.001   | 0.73(0.57,0.93)                                                                    | 0.011  | 0.71(0.57,0.89)                     | 0.003      | 0.72(0.55,0.94)                              | 0.016      |
| Colorectal             | oxybutynin        | 0.60(0.42,0.87)            | 0.006   | 0.65(0.44,0.95) | 0.028   | 0.60(0.42,0.87)                                                                    | 0.007  | 0.71(0.52,0.95)                     | 0.023      | 0.57(0.38,0.87)                              | 0.009      |
| Prostate §§            | calcium           | 0.67(0.51,0.89)            | 0.006   | 0.71(0.51,0.99) | 0.046   | 0.68(0.51,0.90)                                                                    | 0.008  | 0.74(0.57,0.95)                     | 0.020      | 0.72(0.53,0.98)                              | 0.038      |
| Prostate §§            | citalopram        | 0.53(0.37,0.75)            | <0.001  | 0.59(0.39,0.87) | 0.008   | 0.52(0.36,0.74)                                                                    | <0.001 | 0.58(0.43,0.80)                     | 0.001      | 0.59(0.41,0.86)                              | 0.006      |
| Prostate §§            | furosemide        | 0.74(0.64,0.85)            | <0.001  | 0.73(0.62,0.86) | <0.001  | 0.75(0.65,0.86)                                                                    | <0.001 | 0.69(0.61,0.78)                     | <0.001     | 0.74(0.63,0.86)                              | <0.001     |
| Prostate §§            | lactulose         | 0.70(0.57,0.86)            | 0.001   | 0.73(0.58,0.93) | 0.010   | 0.69(0.56,0.85)                                                                    | 0.001  | 0.68(0.57,0.81)                     | <0.001     | 0.70(0.56,0.88)                              | 0.003      |
| Prostate §§            | senna             | 0.67(0.50,0.90)            | 0.007   | 0.73(0.53,1.02) | 0.069   | 0.67(0.50,0.90)                                                                    | 0.007  | 0.70(0.54,0.90)                     | 0.005      | 0.73(0.54,0.99)                              | 0.046      |
| Prostate §§            | vitamin D         | 0.60(0.44,0.82)            | 0.001   | 0.61(0.41,0.89) | 0.011   | 0.59(0.43,0.81)                                                                    | 0.001  | 0.66(0.50,0.88)                     | 0.004      | 0.62(0.44,0.87)                              | 0.005      |
| Bladder                | pantoprazole      | 0.27(0.10,0.71)            | 0.008   | 0.31(0.10,0.92) | 0.035   | 0.27(0.10,0.71)                                                                    | 0.008  | 0.37(0.15,0.91)                     | 0.030      | 0.31(0.11,0.86)                              | 0.024      |
| Bladder                | sotalol           | 0.25(0.09,0.71)            | 0.010   | 0.20(0.06,0.68) | 0.010   | 0.21(0.06,0.68)                                                                    | 0.010  | 0.36(0.16,0.81)                     | 0.014      | 0.18(0.05,0.61)                              | 0.006      |
| Oesophagus             | aspirin high dose | 0.52(0.33,0.83)            | 0.006   | 0.53(0.32,0.88) | 0.014   | 0.55(0.35,0.88)                                                                    | 0.013  | 0.59(0.40,0.87)                     | 0.007      | 0.59(0.36,0.97)                              | 0.038      |
| Non-Hodgkin's lymphoma | vitamin B         | 0.51(0.32,0.81)            | 0.004   | 0.58(0.35,0.95) | 0.029   | 0.50(0.31,0.80)                                                                    | 0.004  | 0.51(0.33,0.77)                     | 0.002      | 0.58(0.34,0.97)                              | 0.040      |
| Leukaemia              | calcium           | 0.56(0.37,0.85)            | 0.007   | 0.40(0.24,0.68) | 0.001   | 0.57(0.38,0.88)                                                                    | 0.010  | 0.68(0.48,0.97)                     | 0.034      | 0.55(0.35,0.87)                              | 0.011      |
| Stomach                | diclofenac*       | 0.18(0.05,0.63)            | 0.007   | 0.23(0.07,0.78) | 0.019   | 0.20(0.06,0.69)                                                                    | 0.011  | 0.41(0.17,0.98)                     | 0.045      | 0.20(0.06,0.72)                              | 0.014      |
| Kidney                 | digoxin           | 0.43(0.23,0.80)            | 0.008   | 0.41(0.20,0.84) | 0.014   | 0.39(0.20,0.75)                                                                    | 0.005  | 0.58(0.35,0.95)                     | 0.031      | 0.44(0.22,0.88)                              | 0.020      |

† comorbidities include diabetes, myocardial infarction, coronary heart disease, heart failure, peripheral vascular disease, dementia, cerebrovascular disease, chronic obstructive pulmonary disease, osteoporosis, rheumatological disease, renal disease, liver disease, irritable bowel disease, human immunodeficiency viruses and hemiplegia/paraplegia, plus potential site-specific confounders; OR odds ratio; CI confidence interval; medicines systemic unless otherwise indicated\* (local); HRT: hormone replacement therapy; § females only; §§ males only
