# Supplementary material for: A systematic assessment of the association between frequently prescribed medicines and the risk of common cancers: a series of nested case-control studies
Source: Springer Nature journal article supplement (doi:10.1186/s12916-020-01891-5), 2021-01-26
Supplement: MOESM3 [file 18801814]

## **Supplementary Figures**

### **Index of Legends**

Fig S1: MWAS plots for comorbidity adjusted analyses: exposure any prescription

Fig S2: MWAS plots for comorbidity & smoking adjusted analyses: exposure any prescription

Fig S1: MWAS plots for comorbidity adjusted analyses: exposure any prescription

MWAS plot: breast cancer  
Comorbidity adjusted analysis (exposure any prescription)

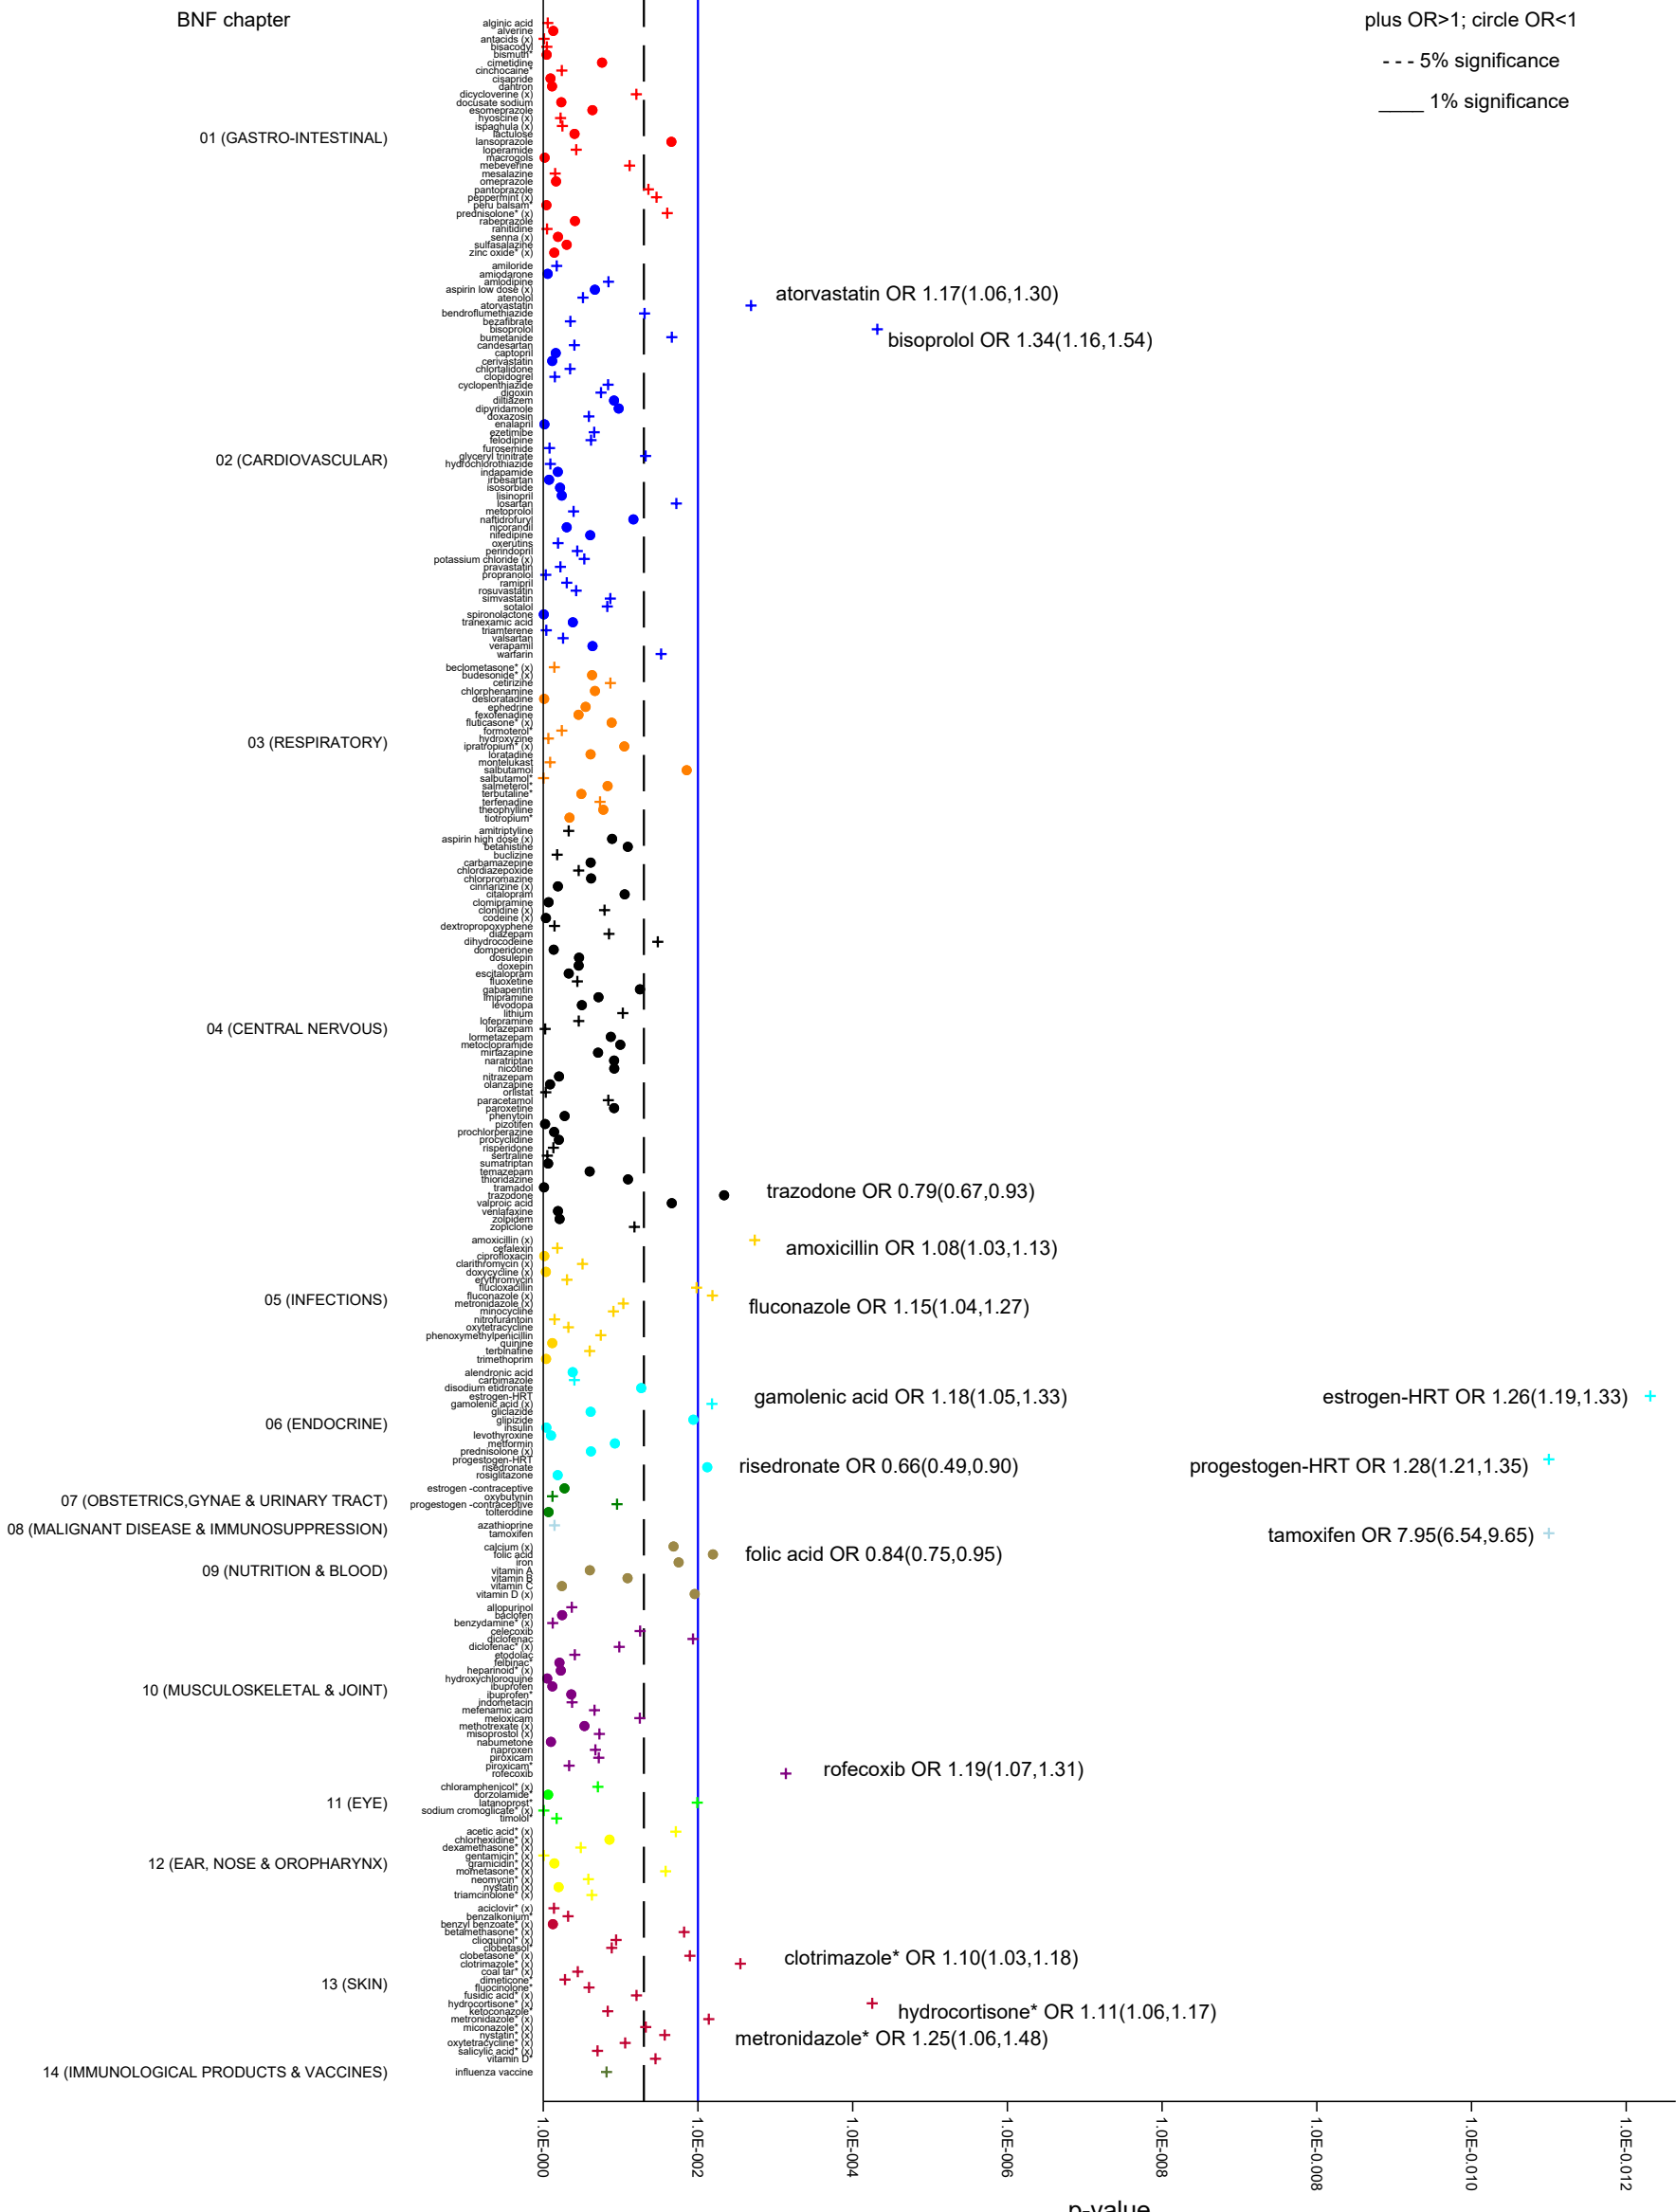

\* : local medicine; females only included in this analysis; (l): local; (x) most prevalent chapter

# MWAS plot: lung cancer

## Comorbidity adjusted analysis (exposure any prescription)

plus OR>1; circle OR<1  
 --- 5% significance  
 — 1% significance  
 +

cimetidine OR 1.39(1.27,1.51)

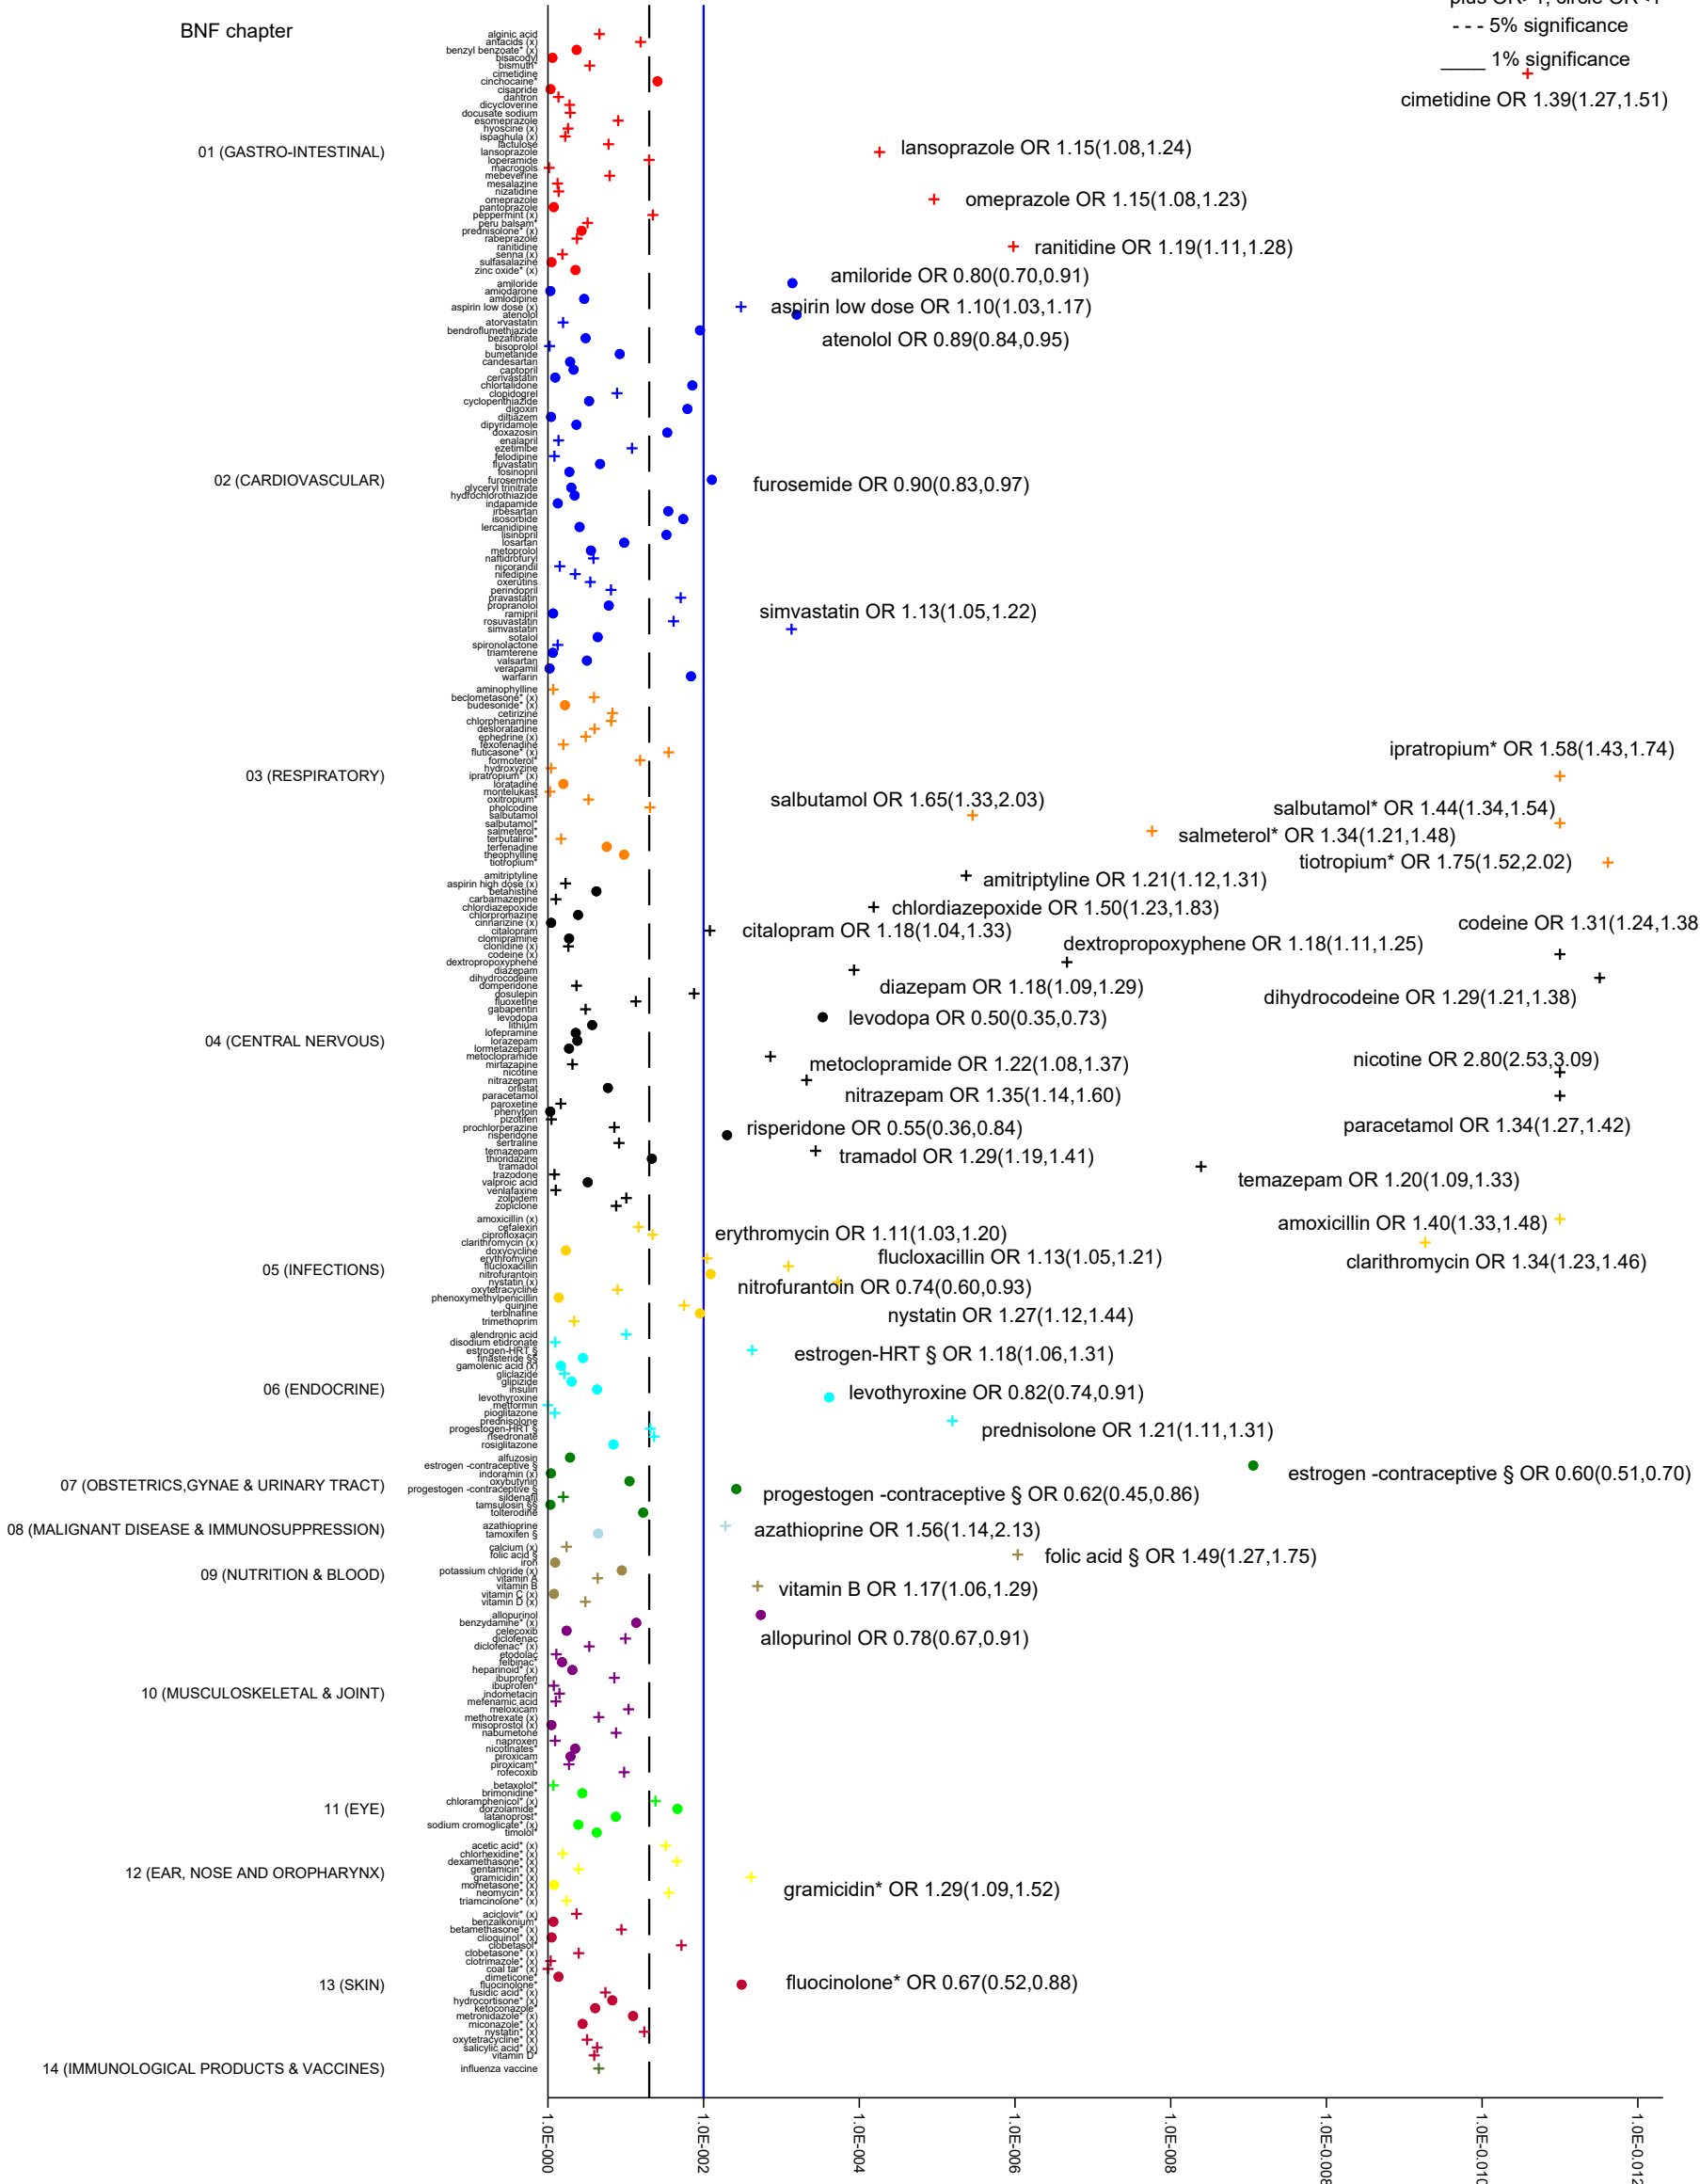

Comorbidity adjusted analysis (exposure any prescription)

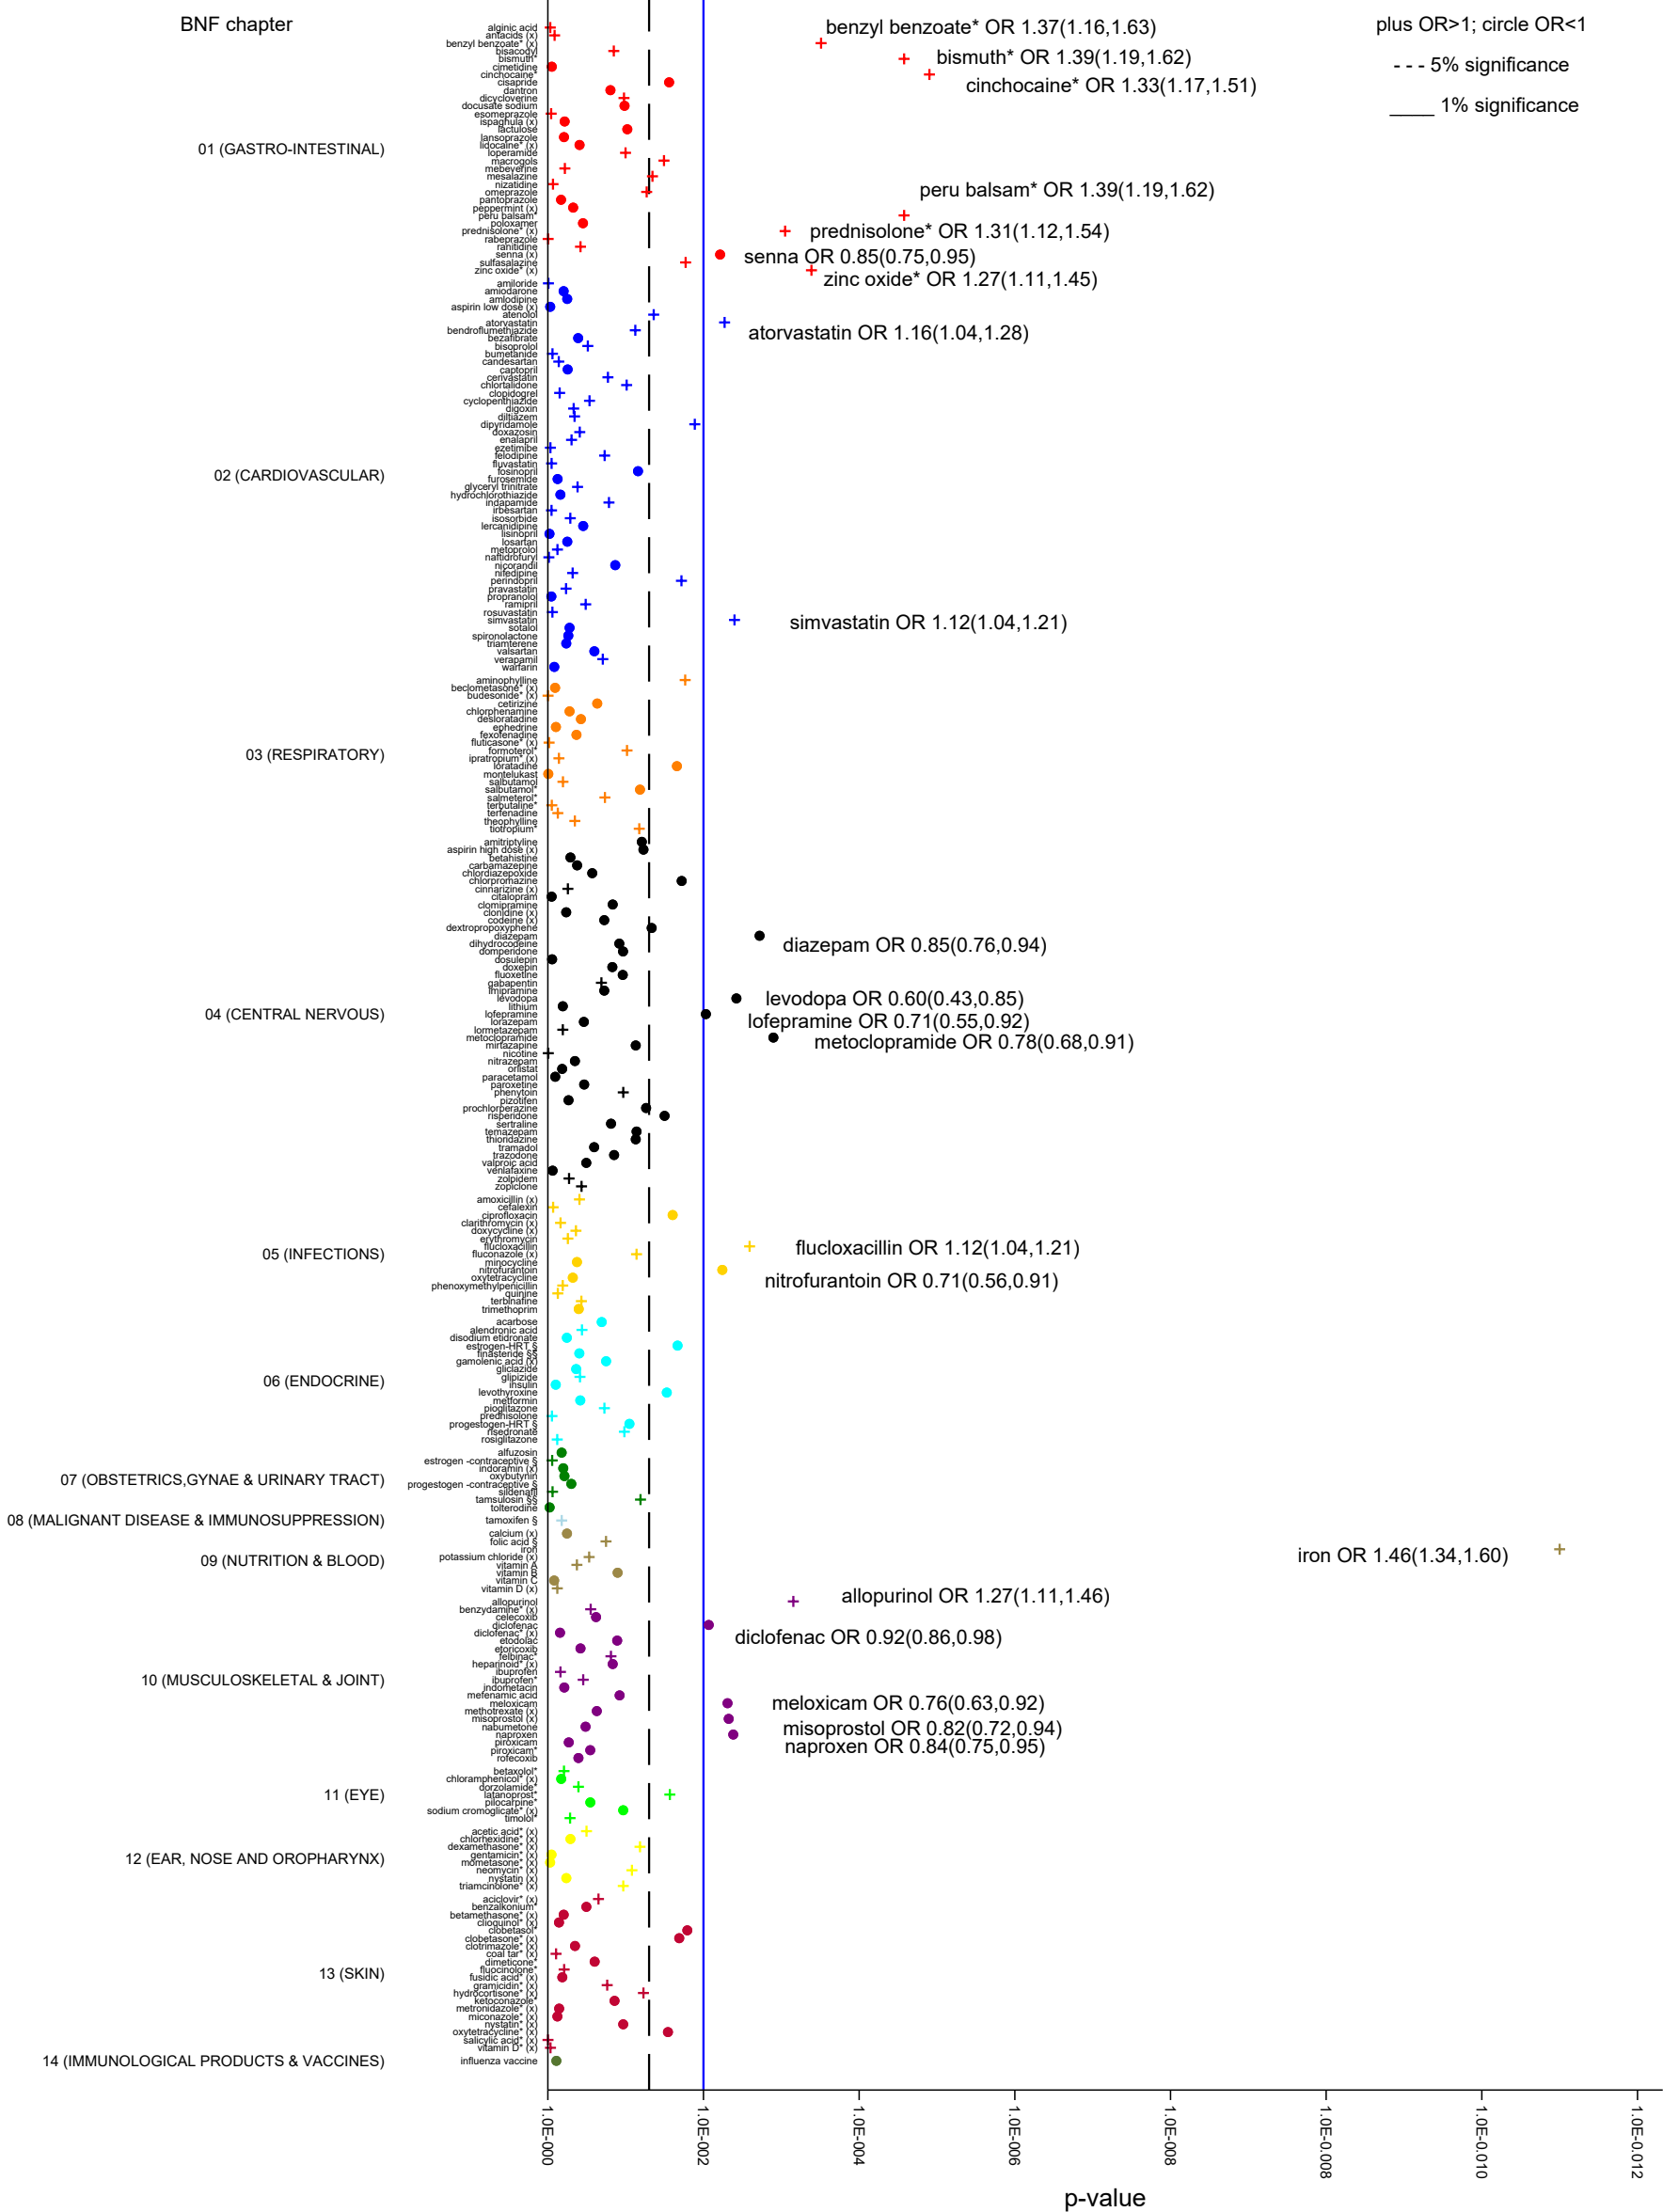

MWAS plot: prostate cancer  
Comorbidity adjusted analysis (exposure any prescription)

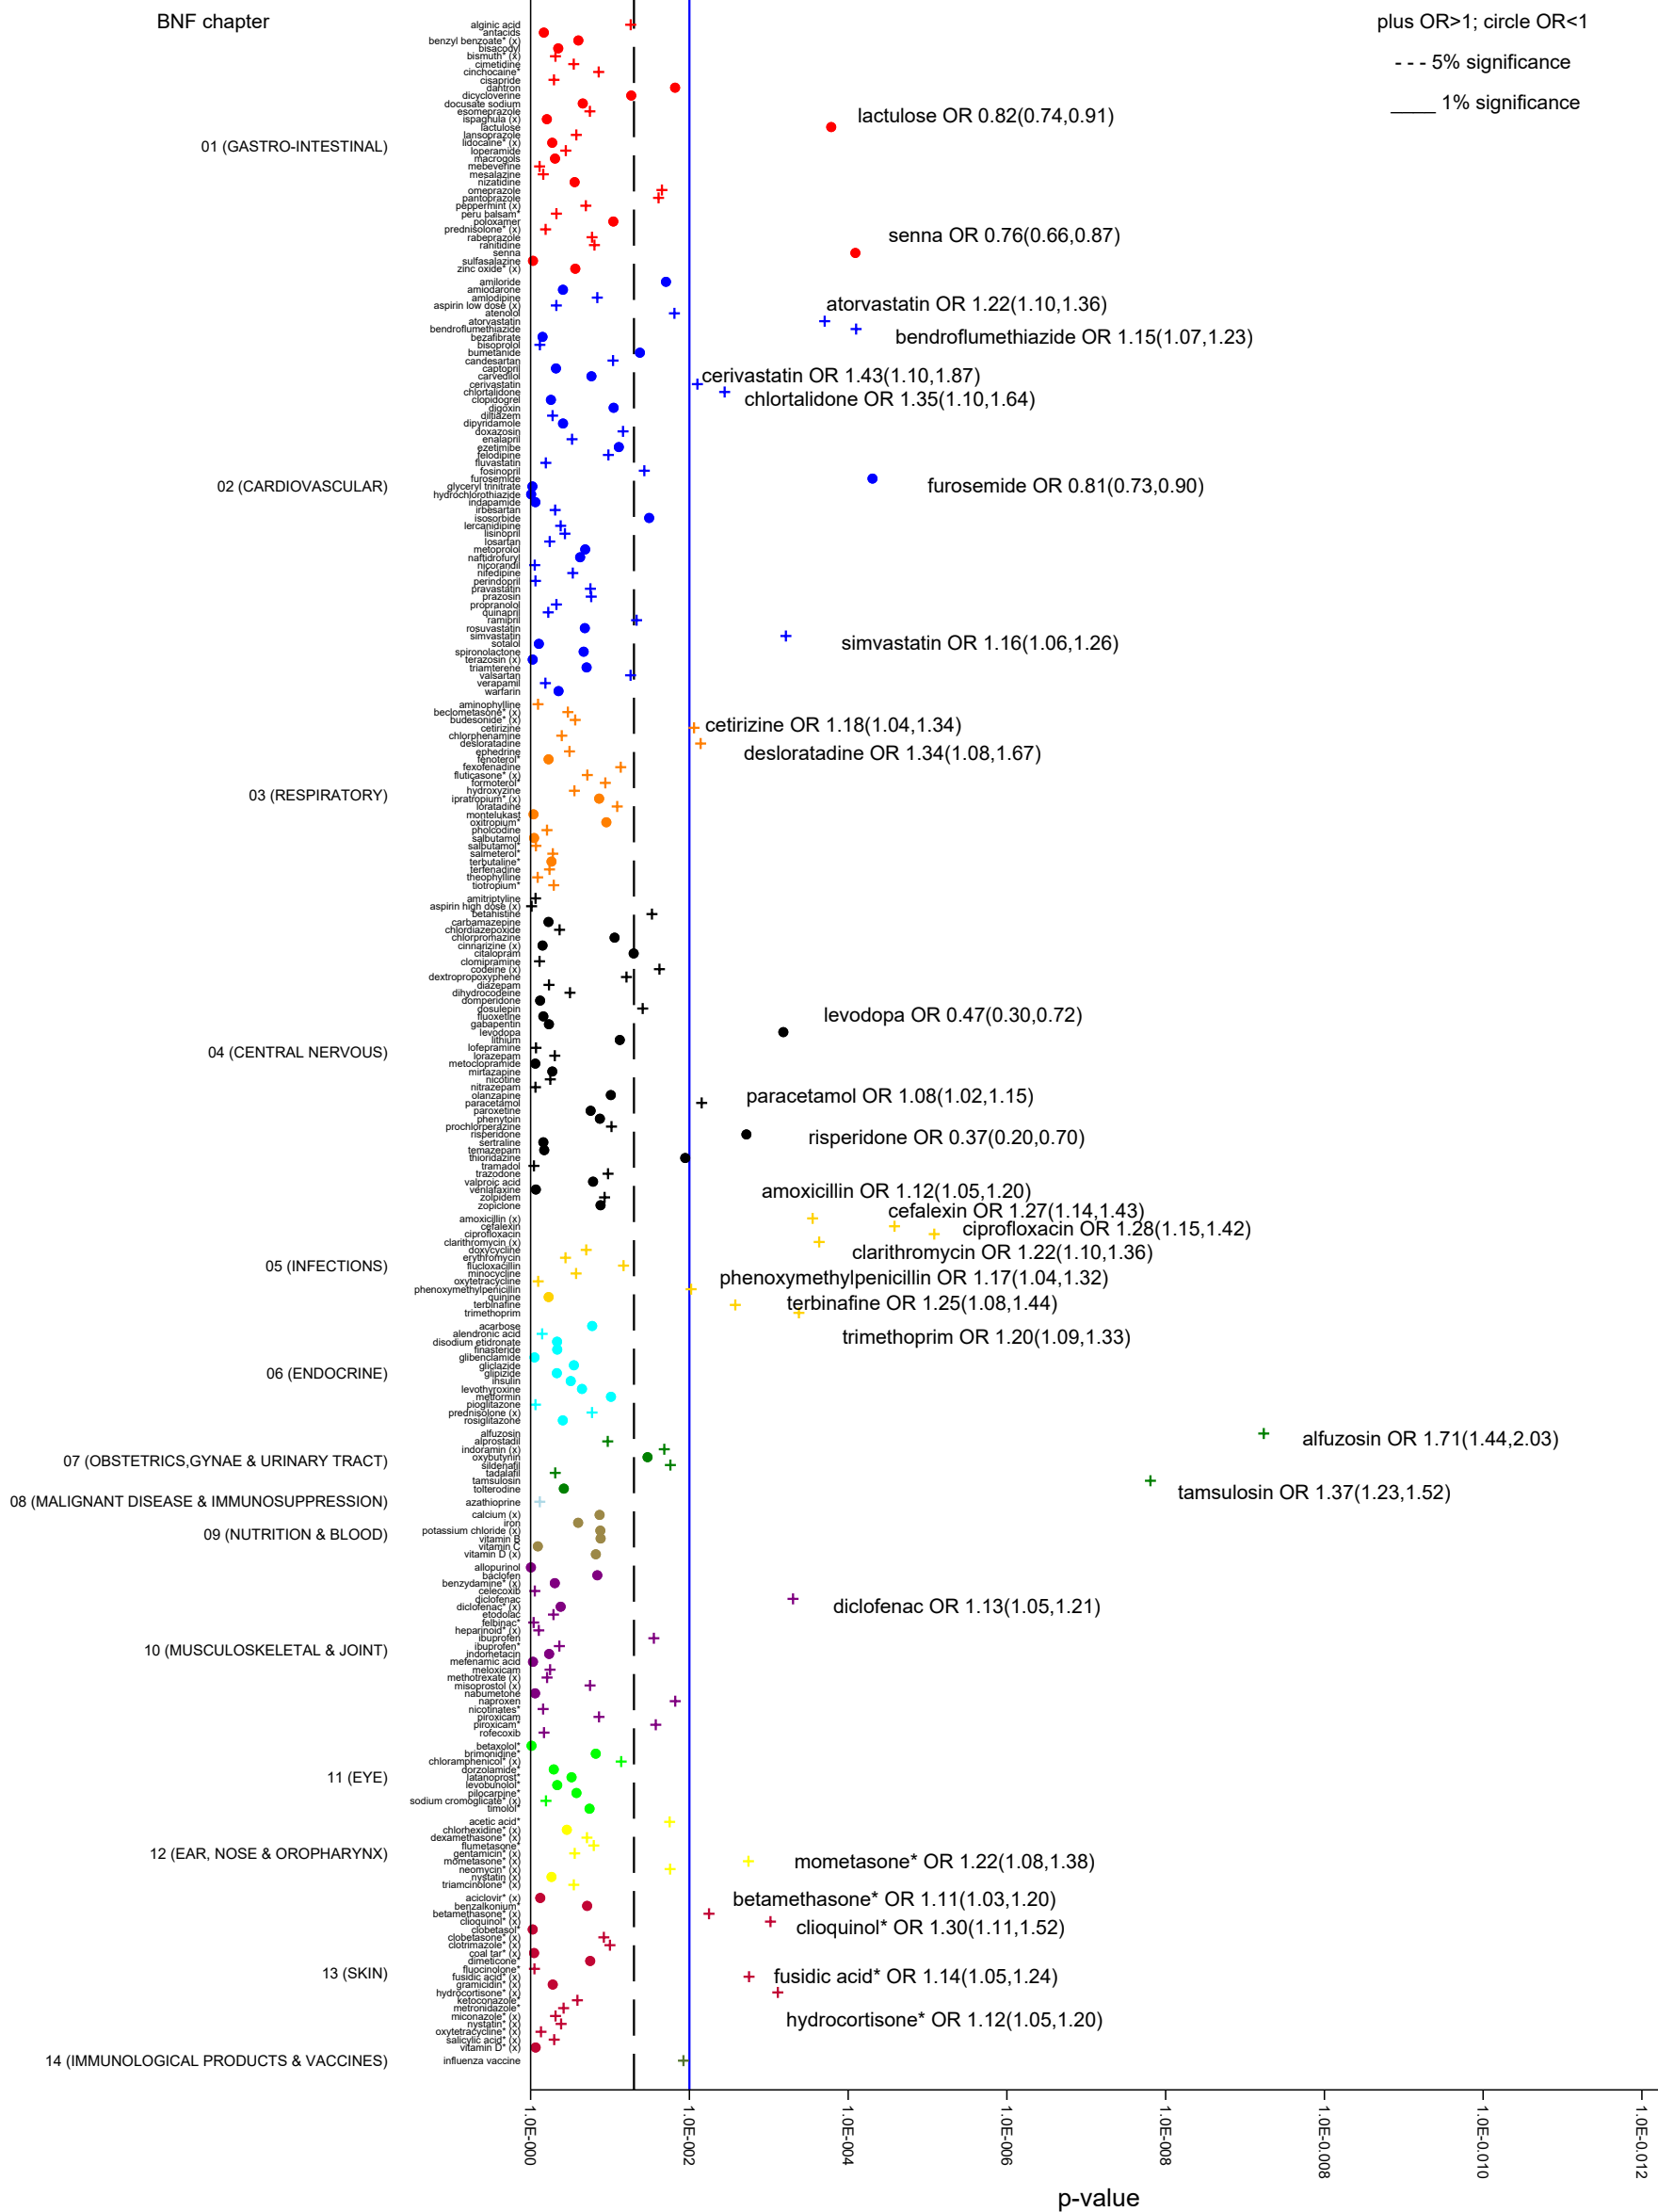

Comorbidity adjusted analysis (exposure any prescription)

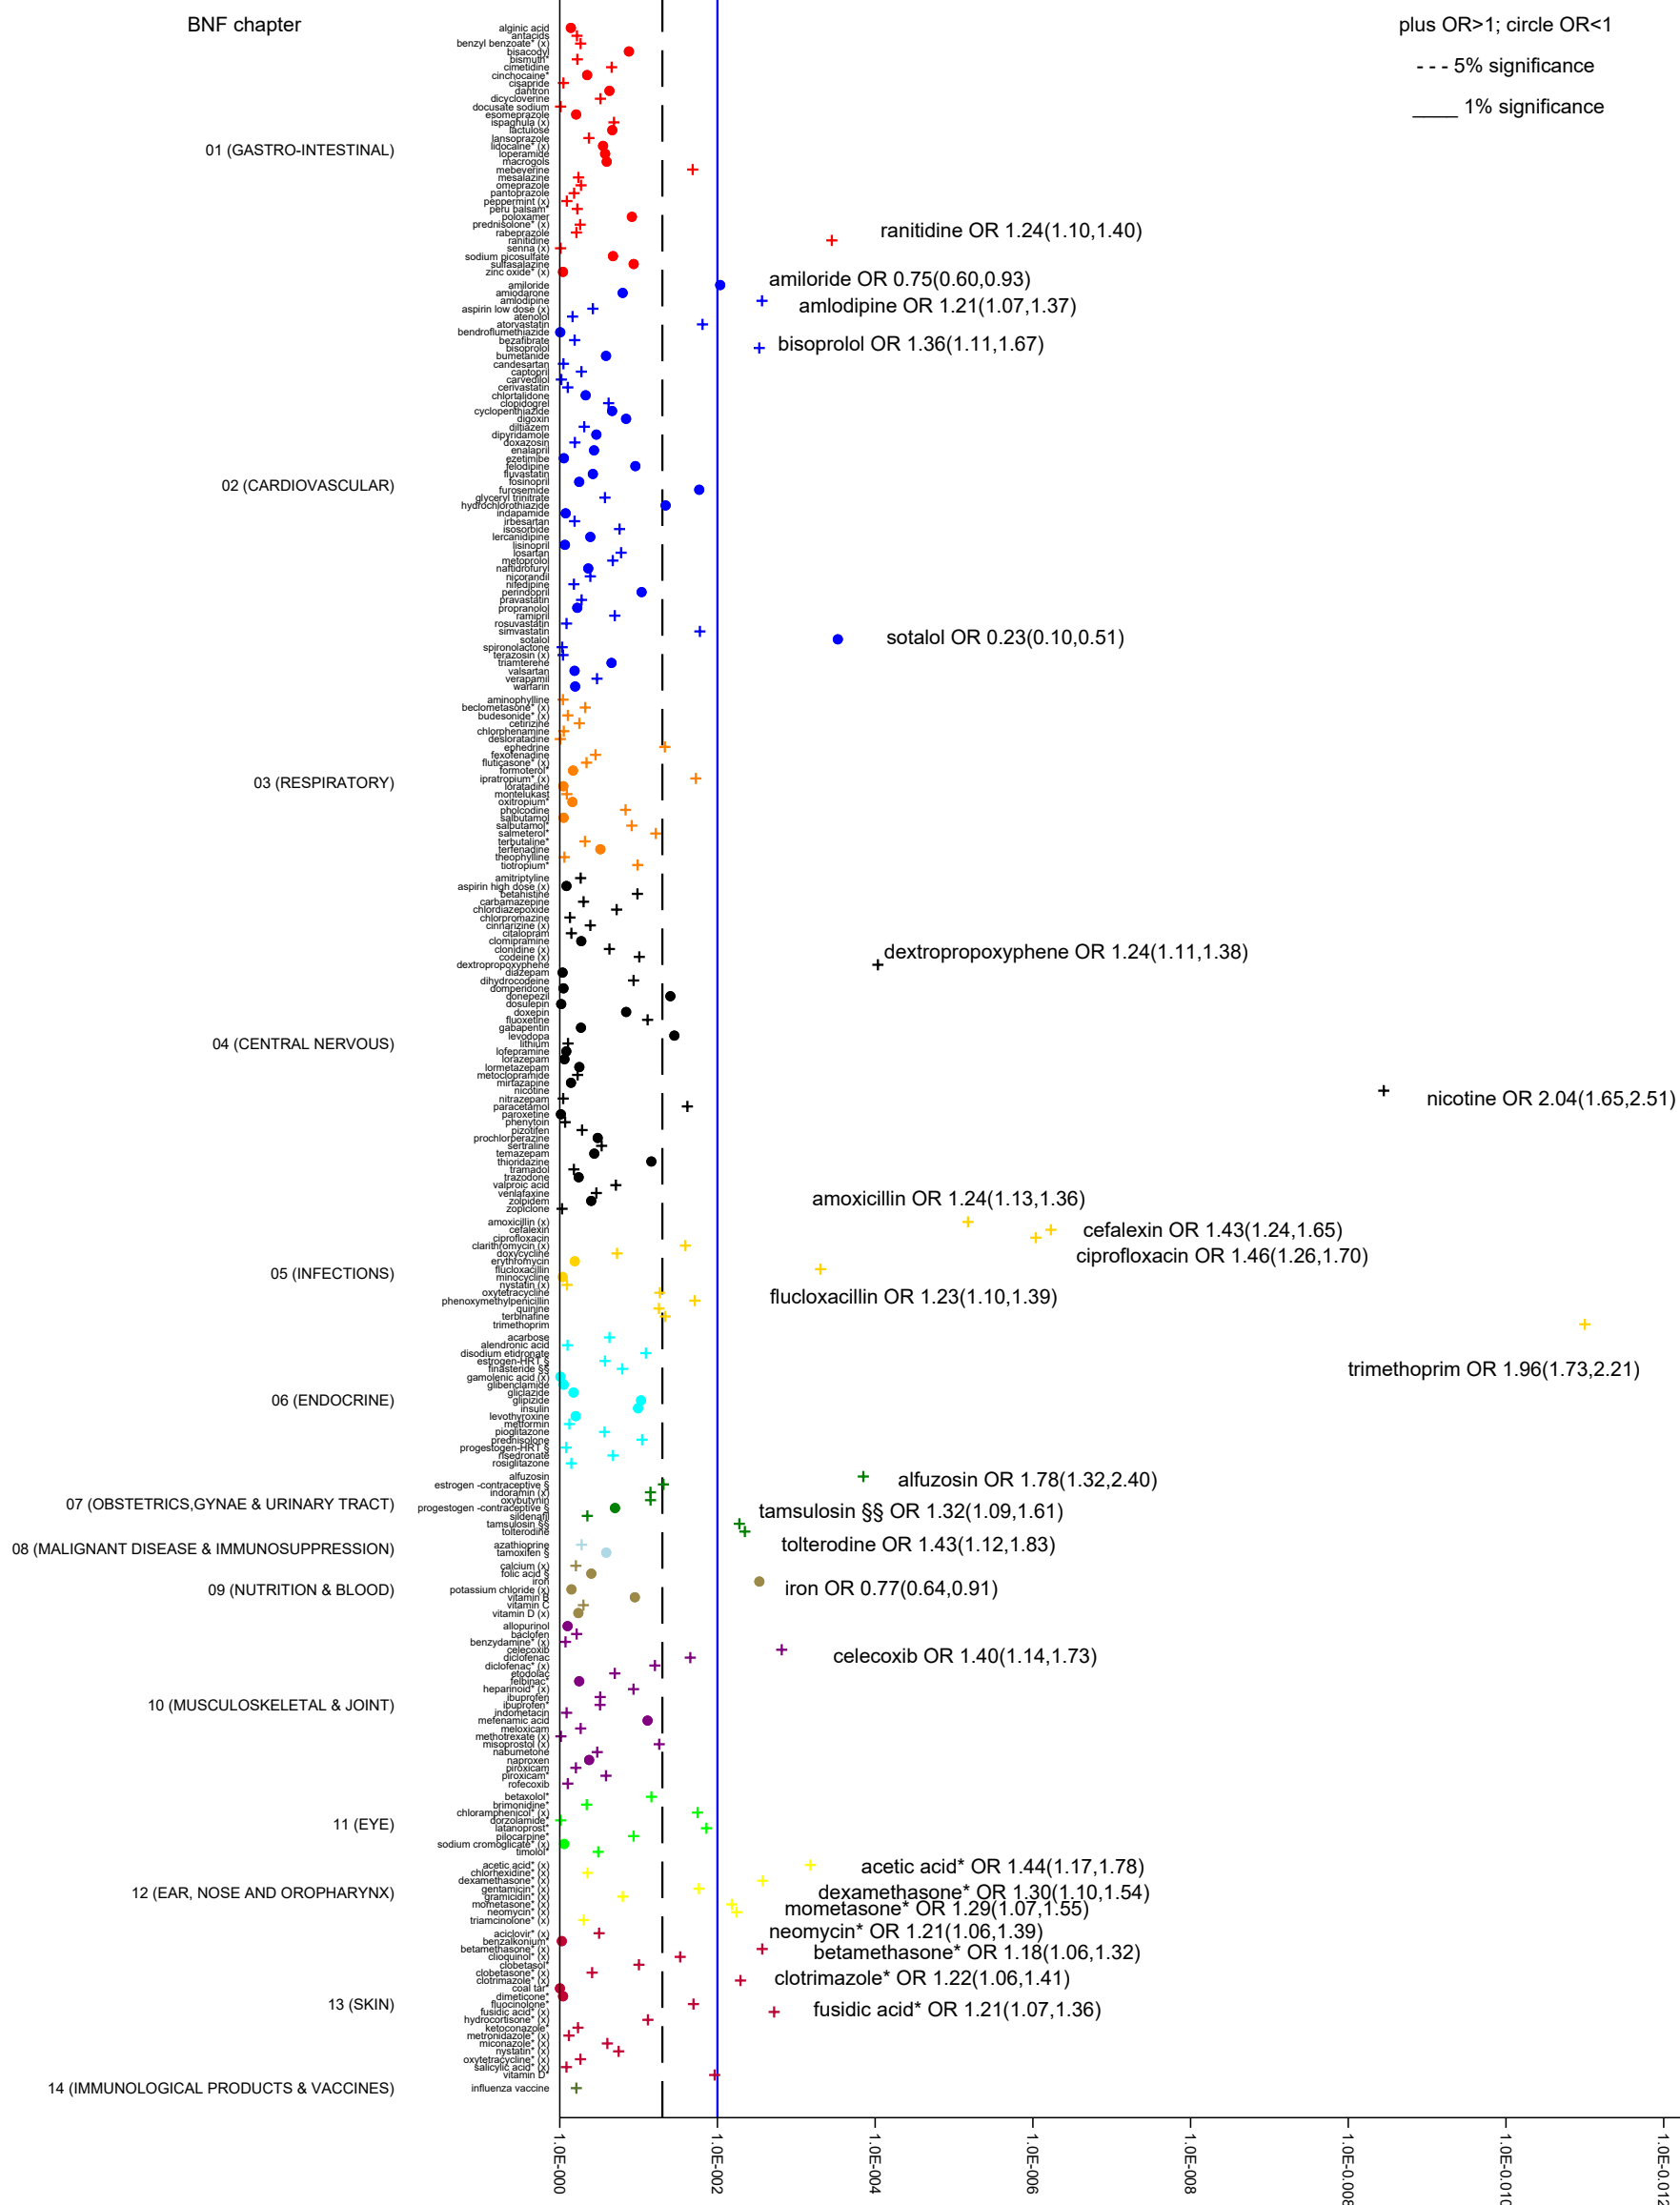

\* : local medicine; § females only; §§ males only; (x) most prevalent chapter

MWAS plot: malignant melanoma  
Comorbidity adjusted analysis (exposure any prescription)

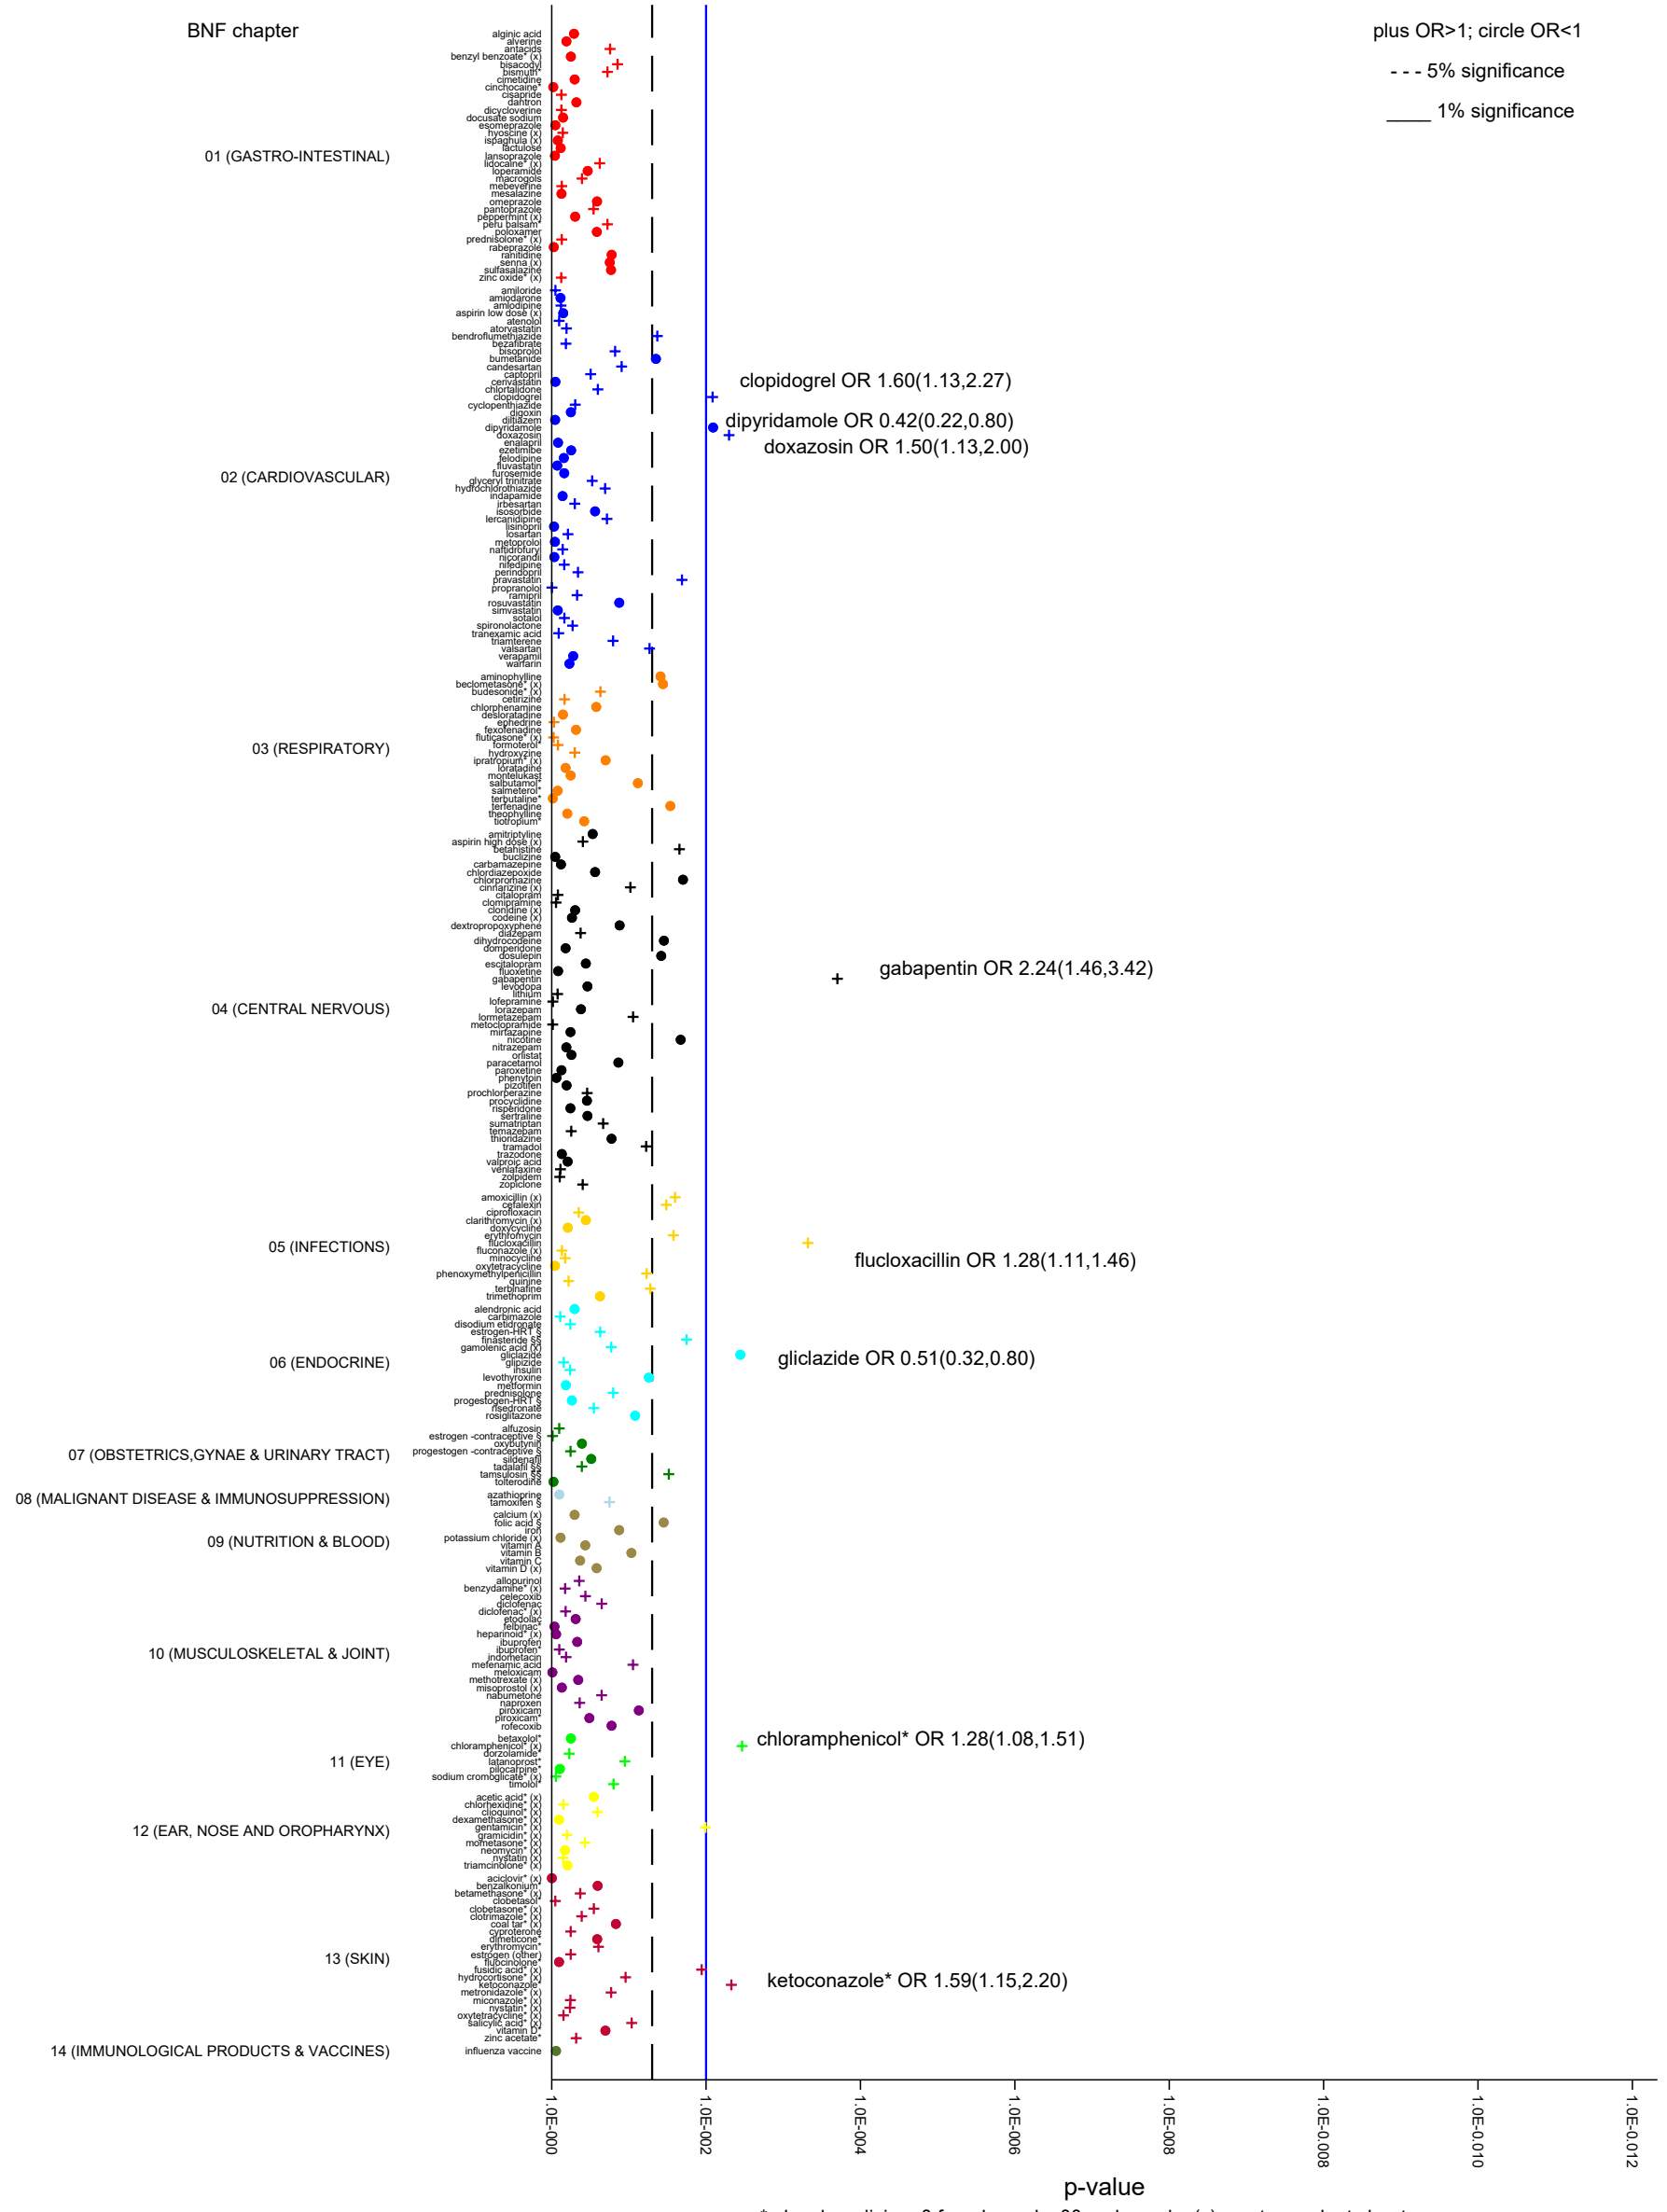

\* : local medicine; § females only; §§ males only; (x) most prevalent chapter



# MWAS plot: oesophageal cancer

## Comorbidity adjusted analysis (exposure any prescription)

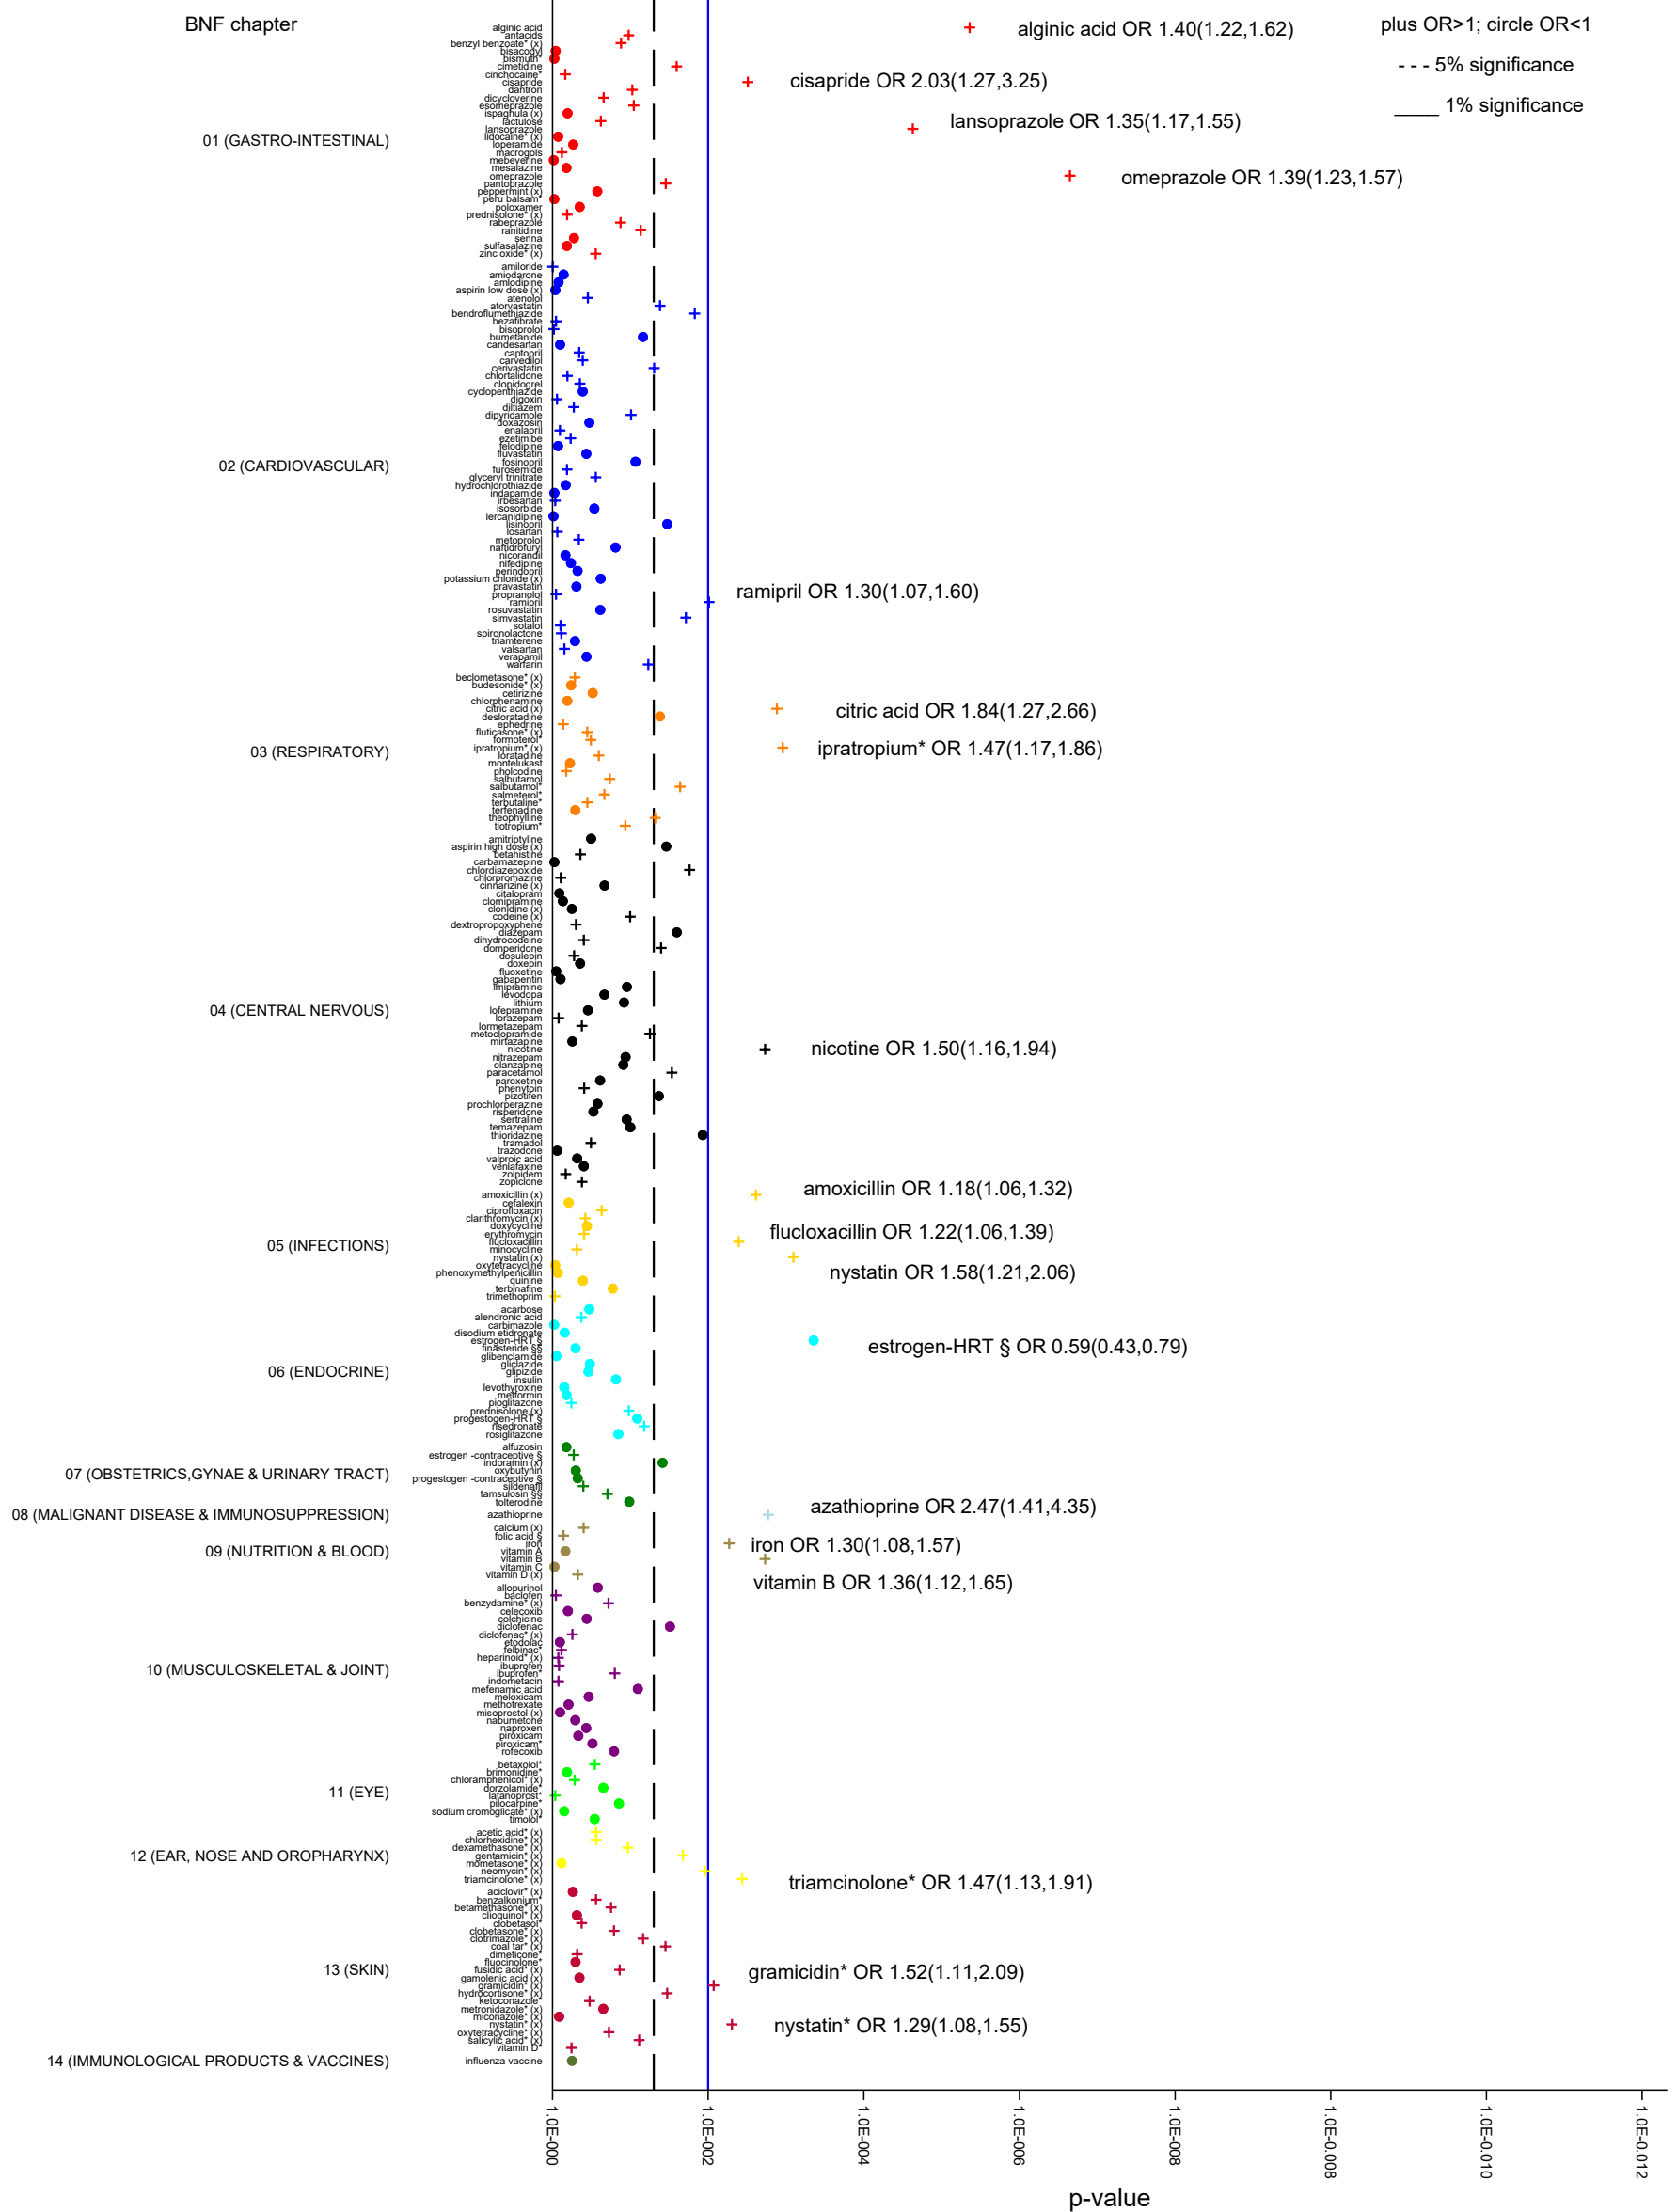

\* : local medicine; § females only; §§ males only; (x) most prevalent chapter

# MWAS plot: non-Hodgkin's lymphoma

## Comorbidity adjusted analysis (exposure any prescription)

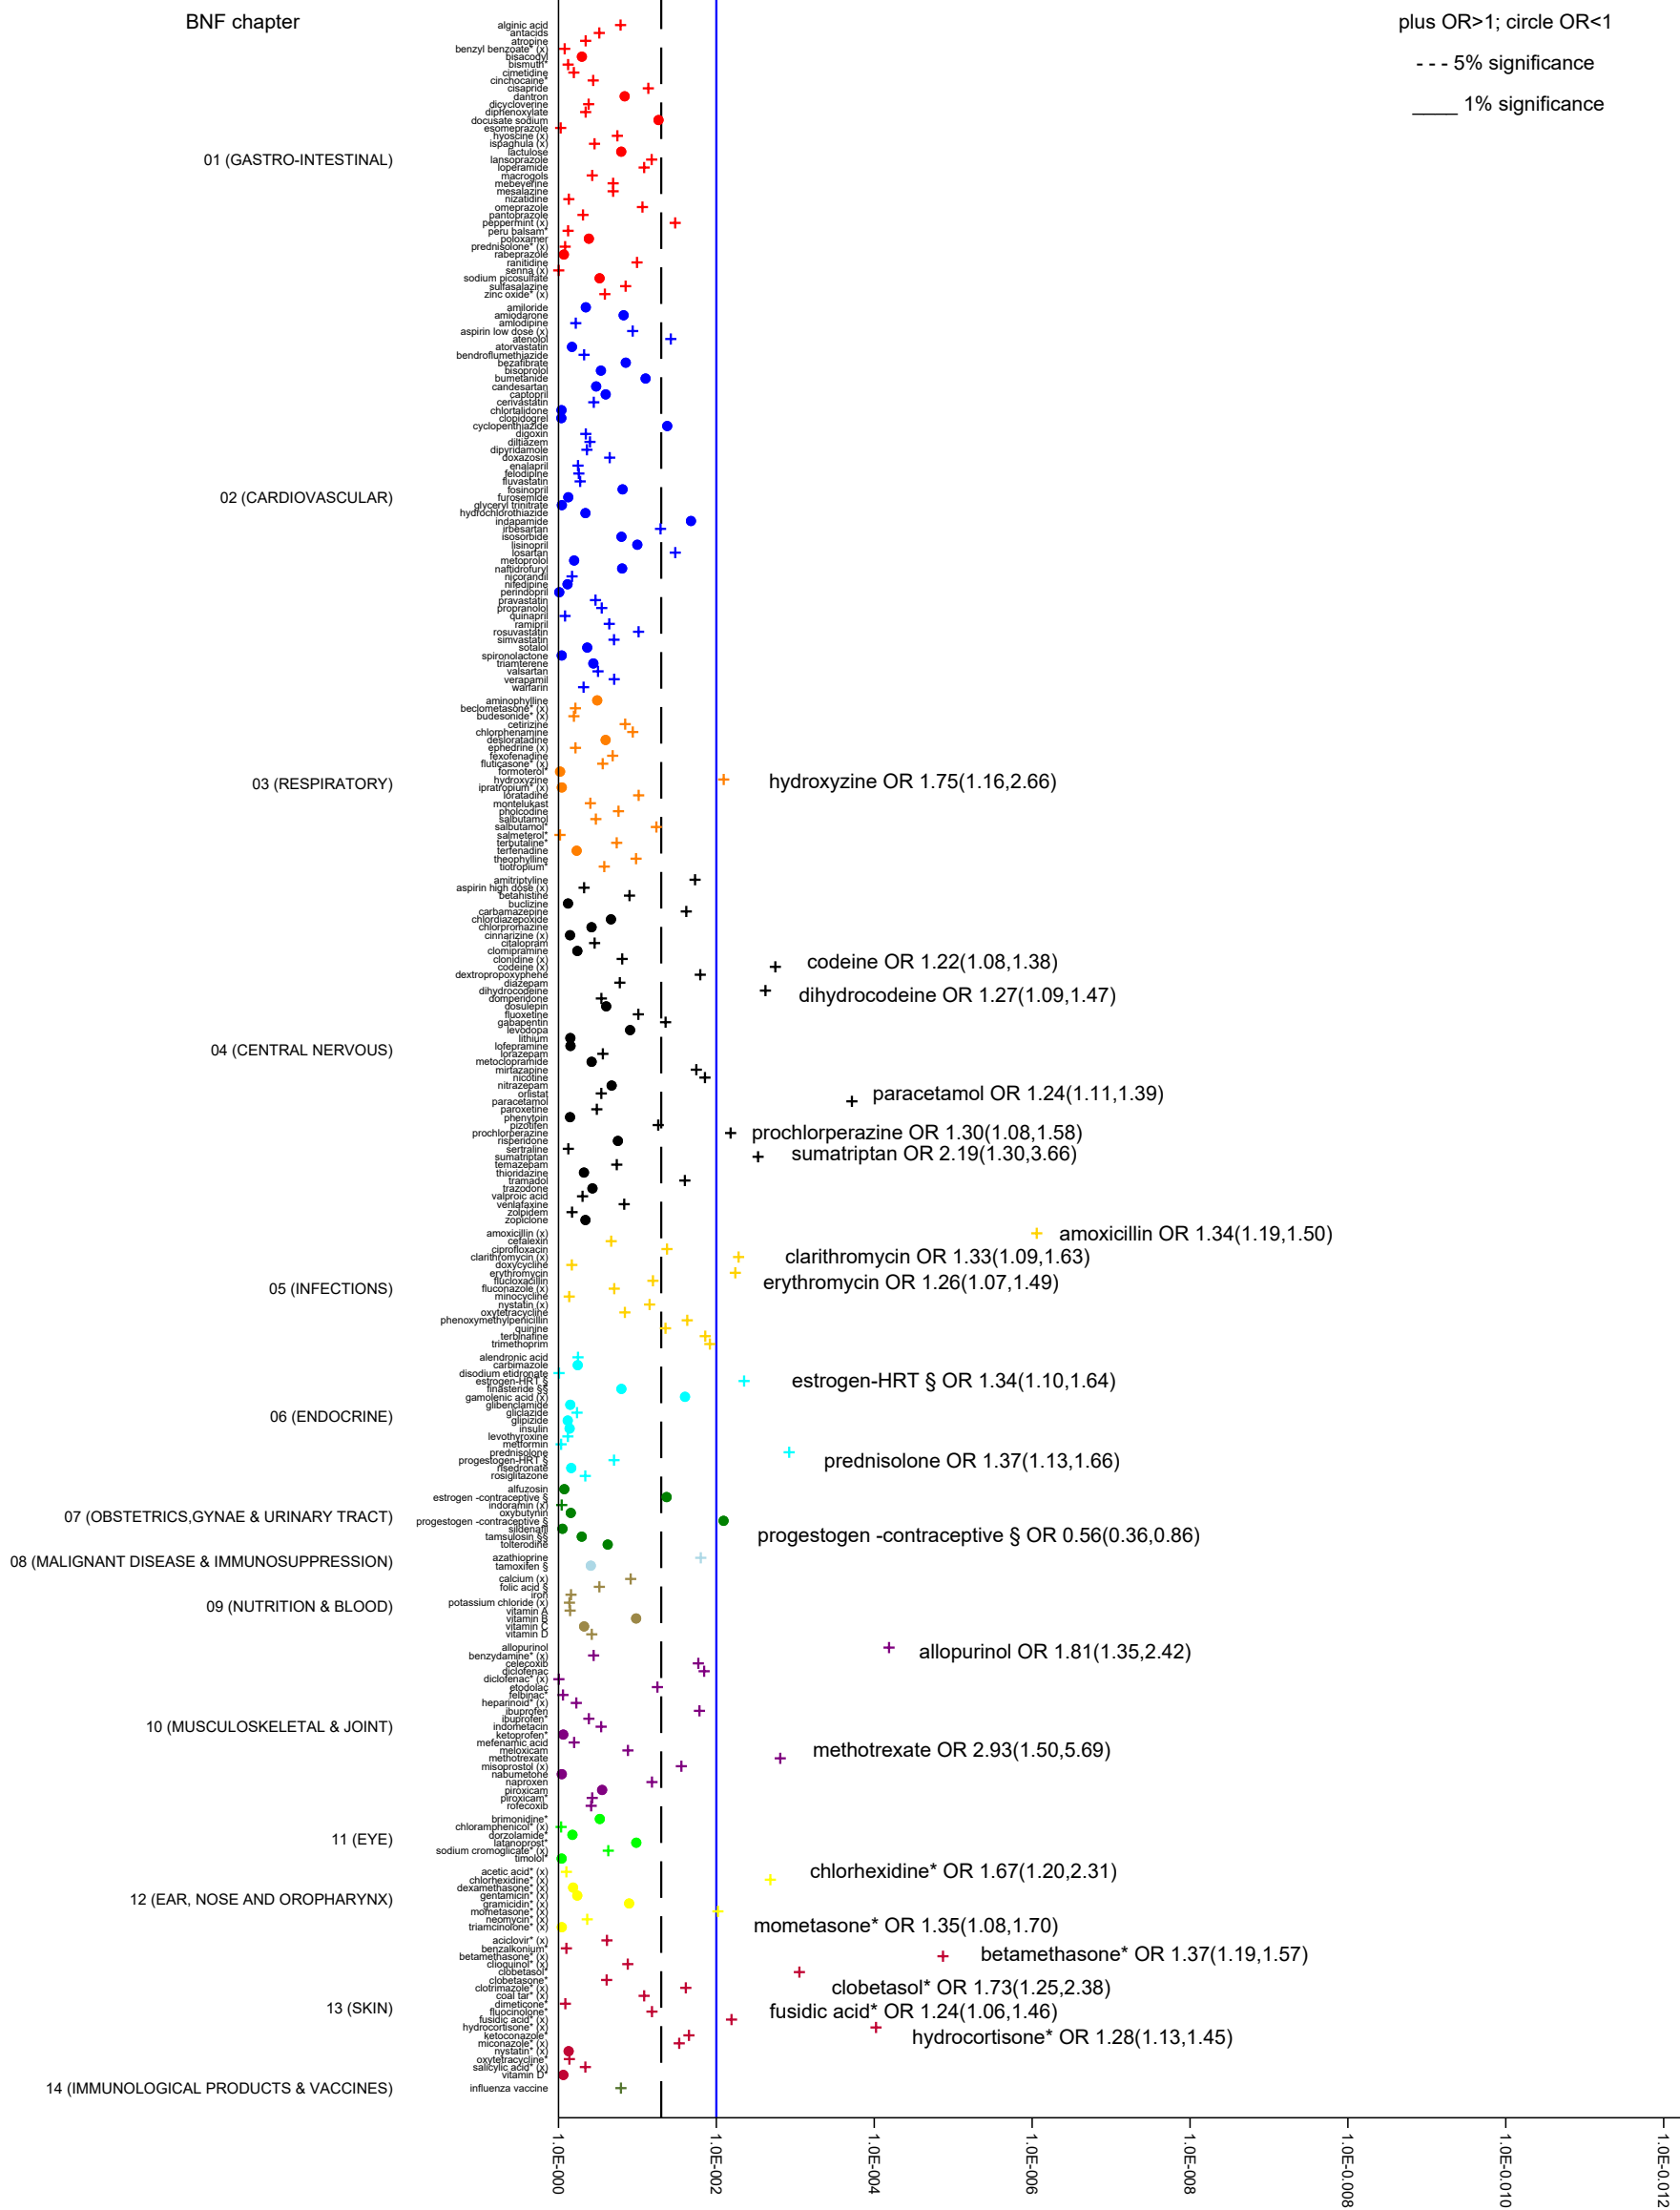

\* : local medicine; § females only; §§ males only; (x) most prevalent chapter

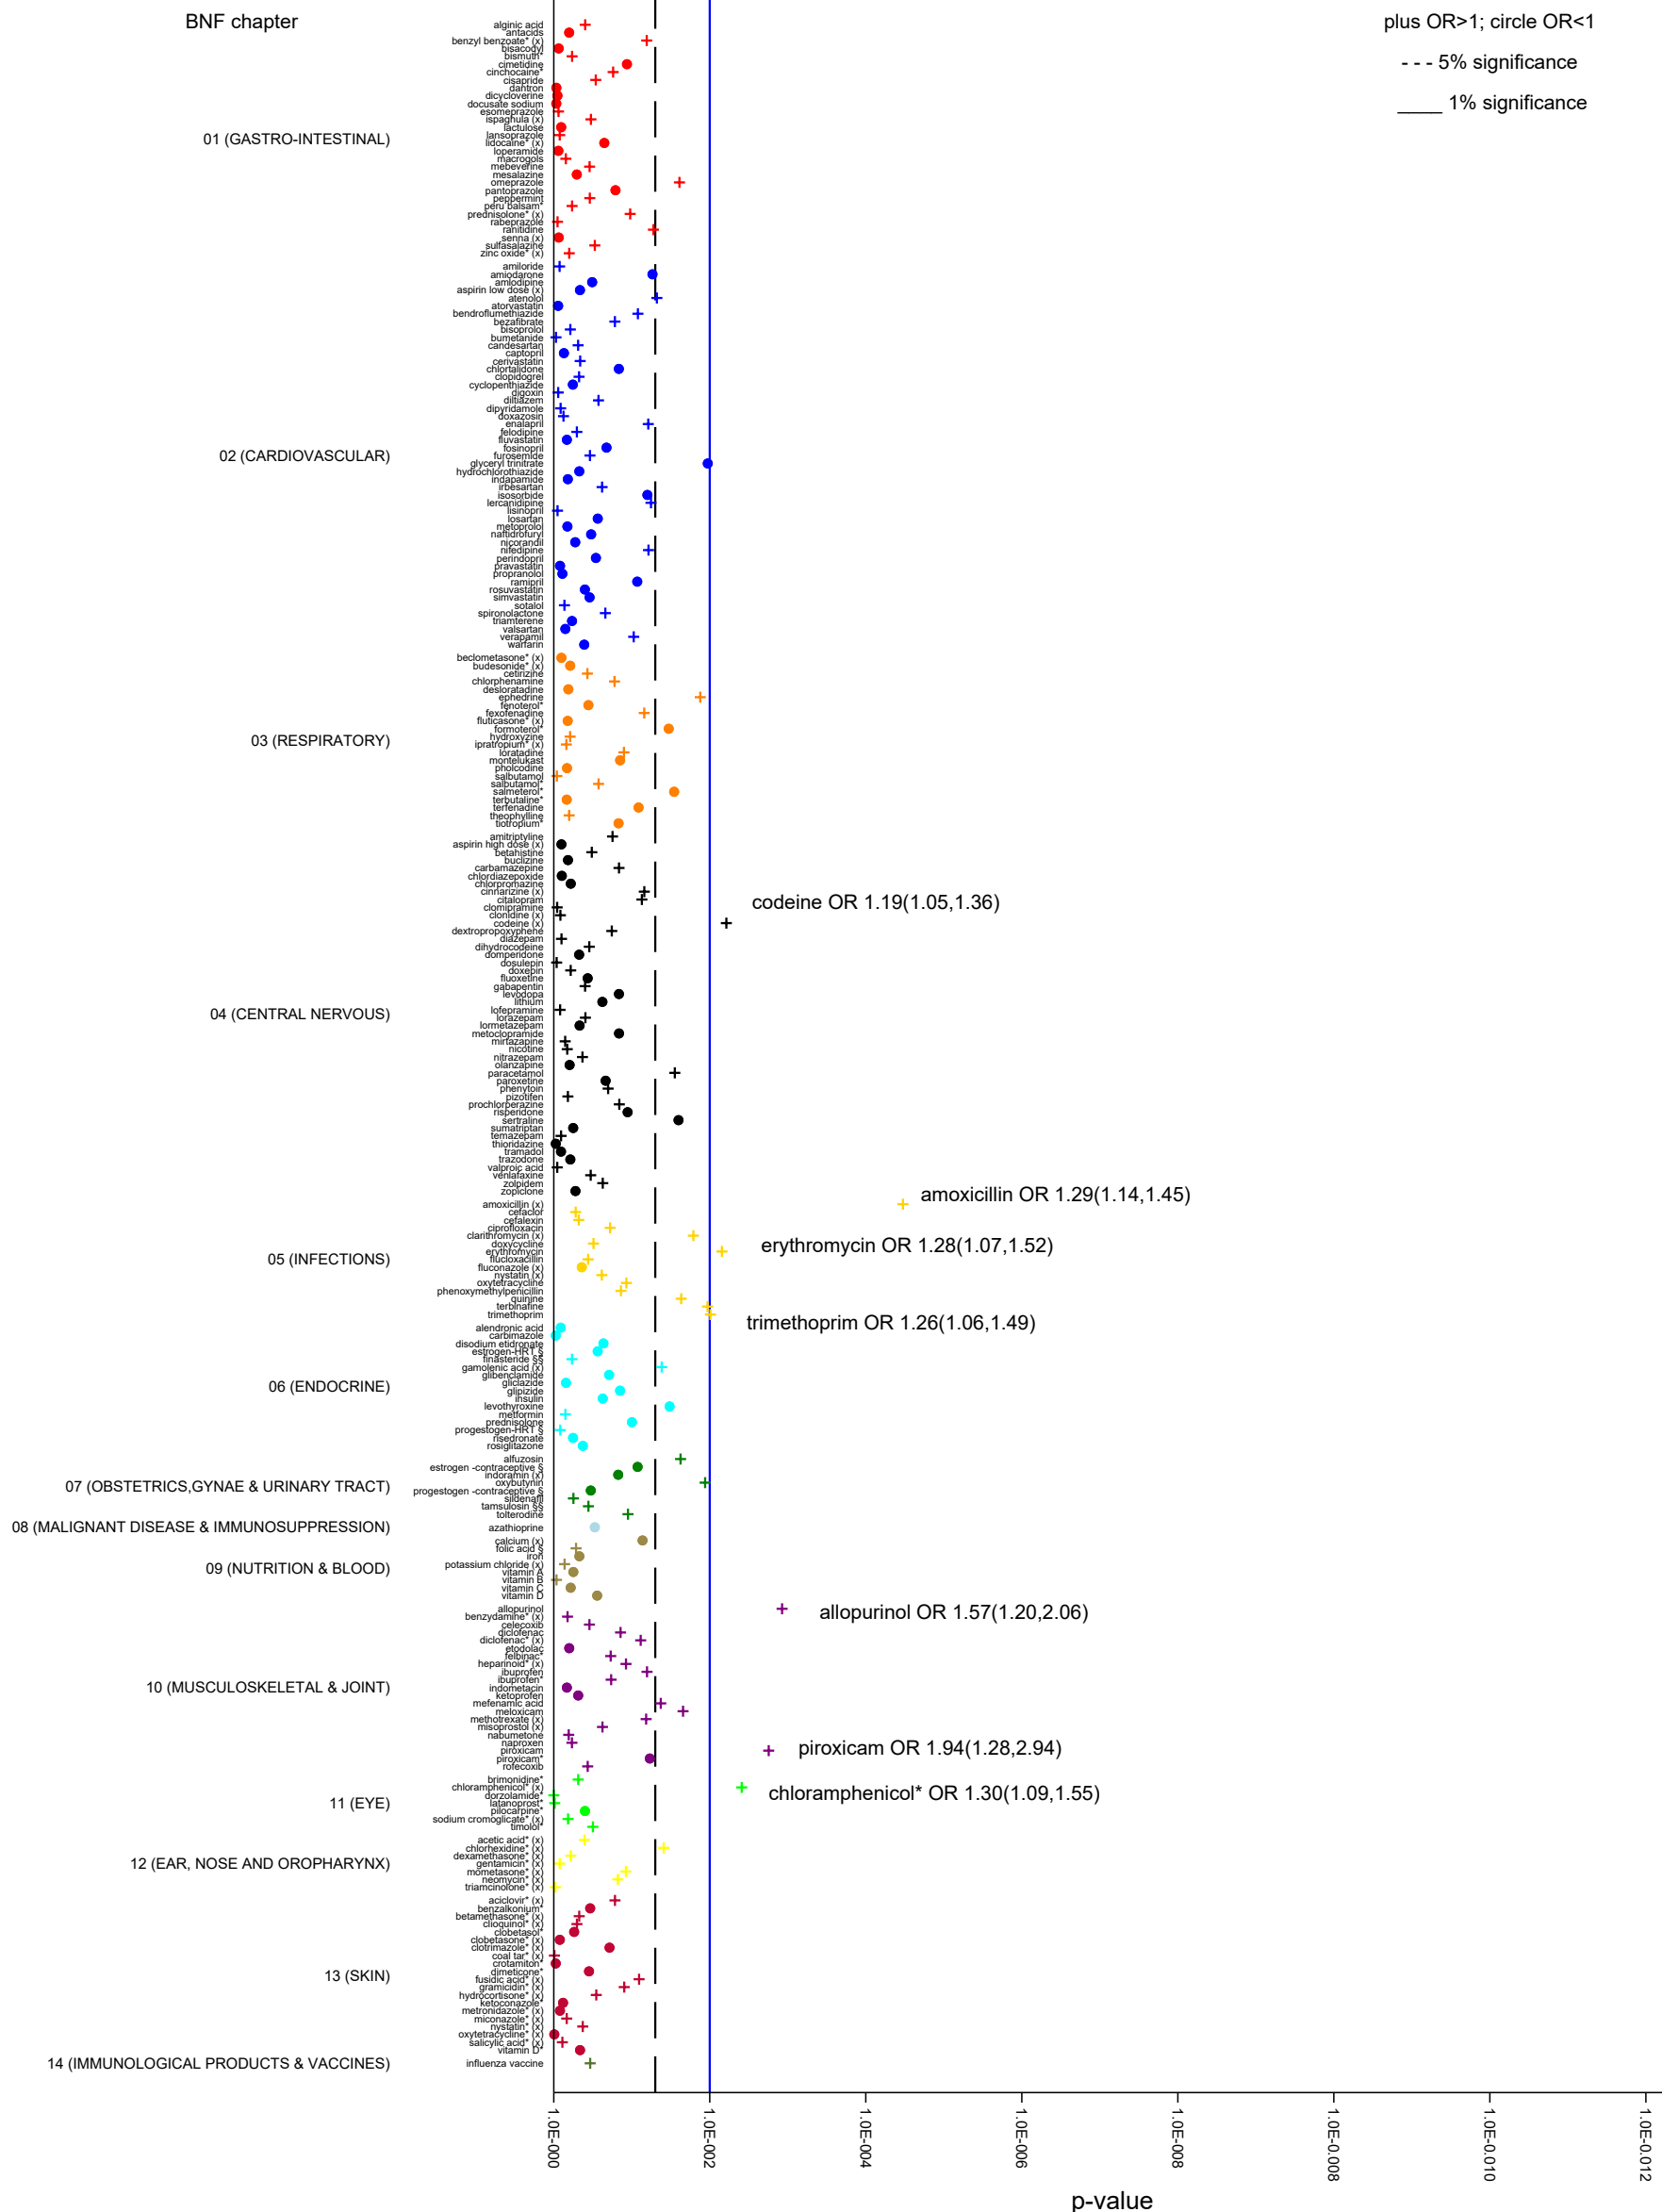

MWAS plot: oral (inc. head,neck & nasal) cancer  
Comorbidity adjusted analysis (exposure any prescription)

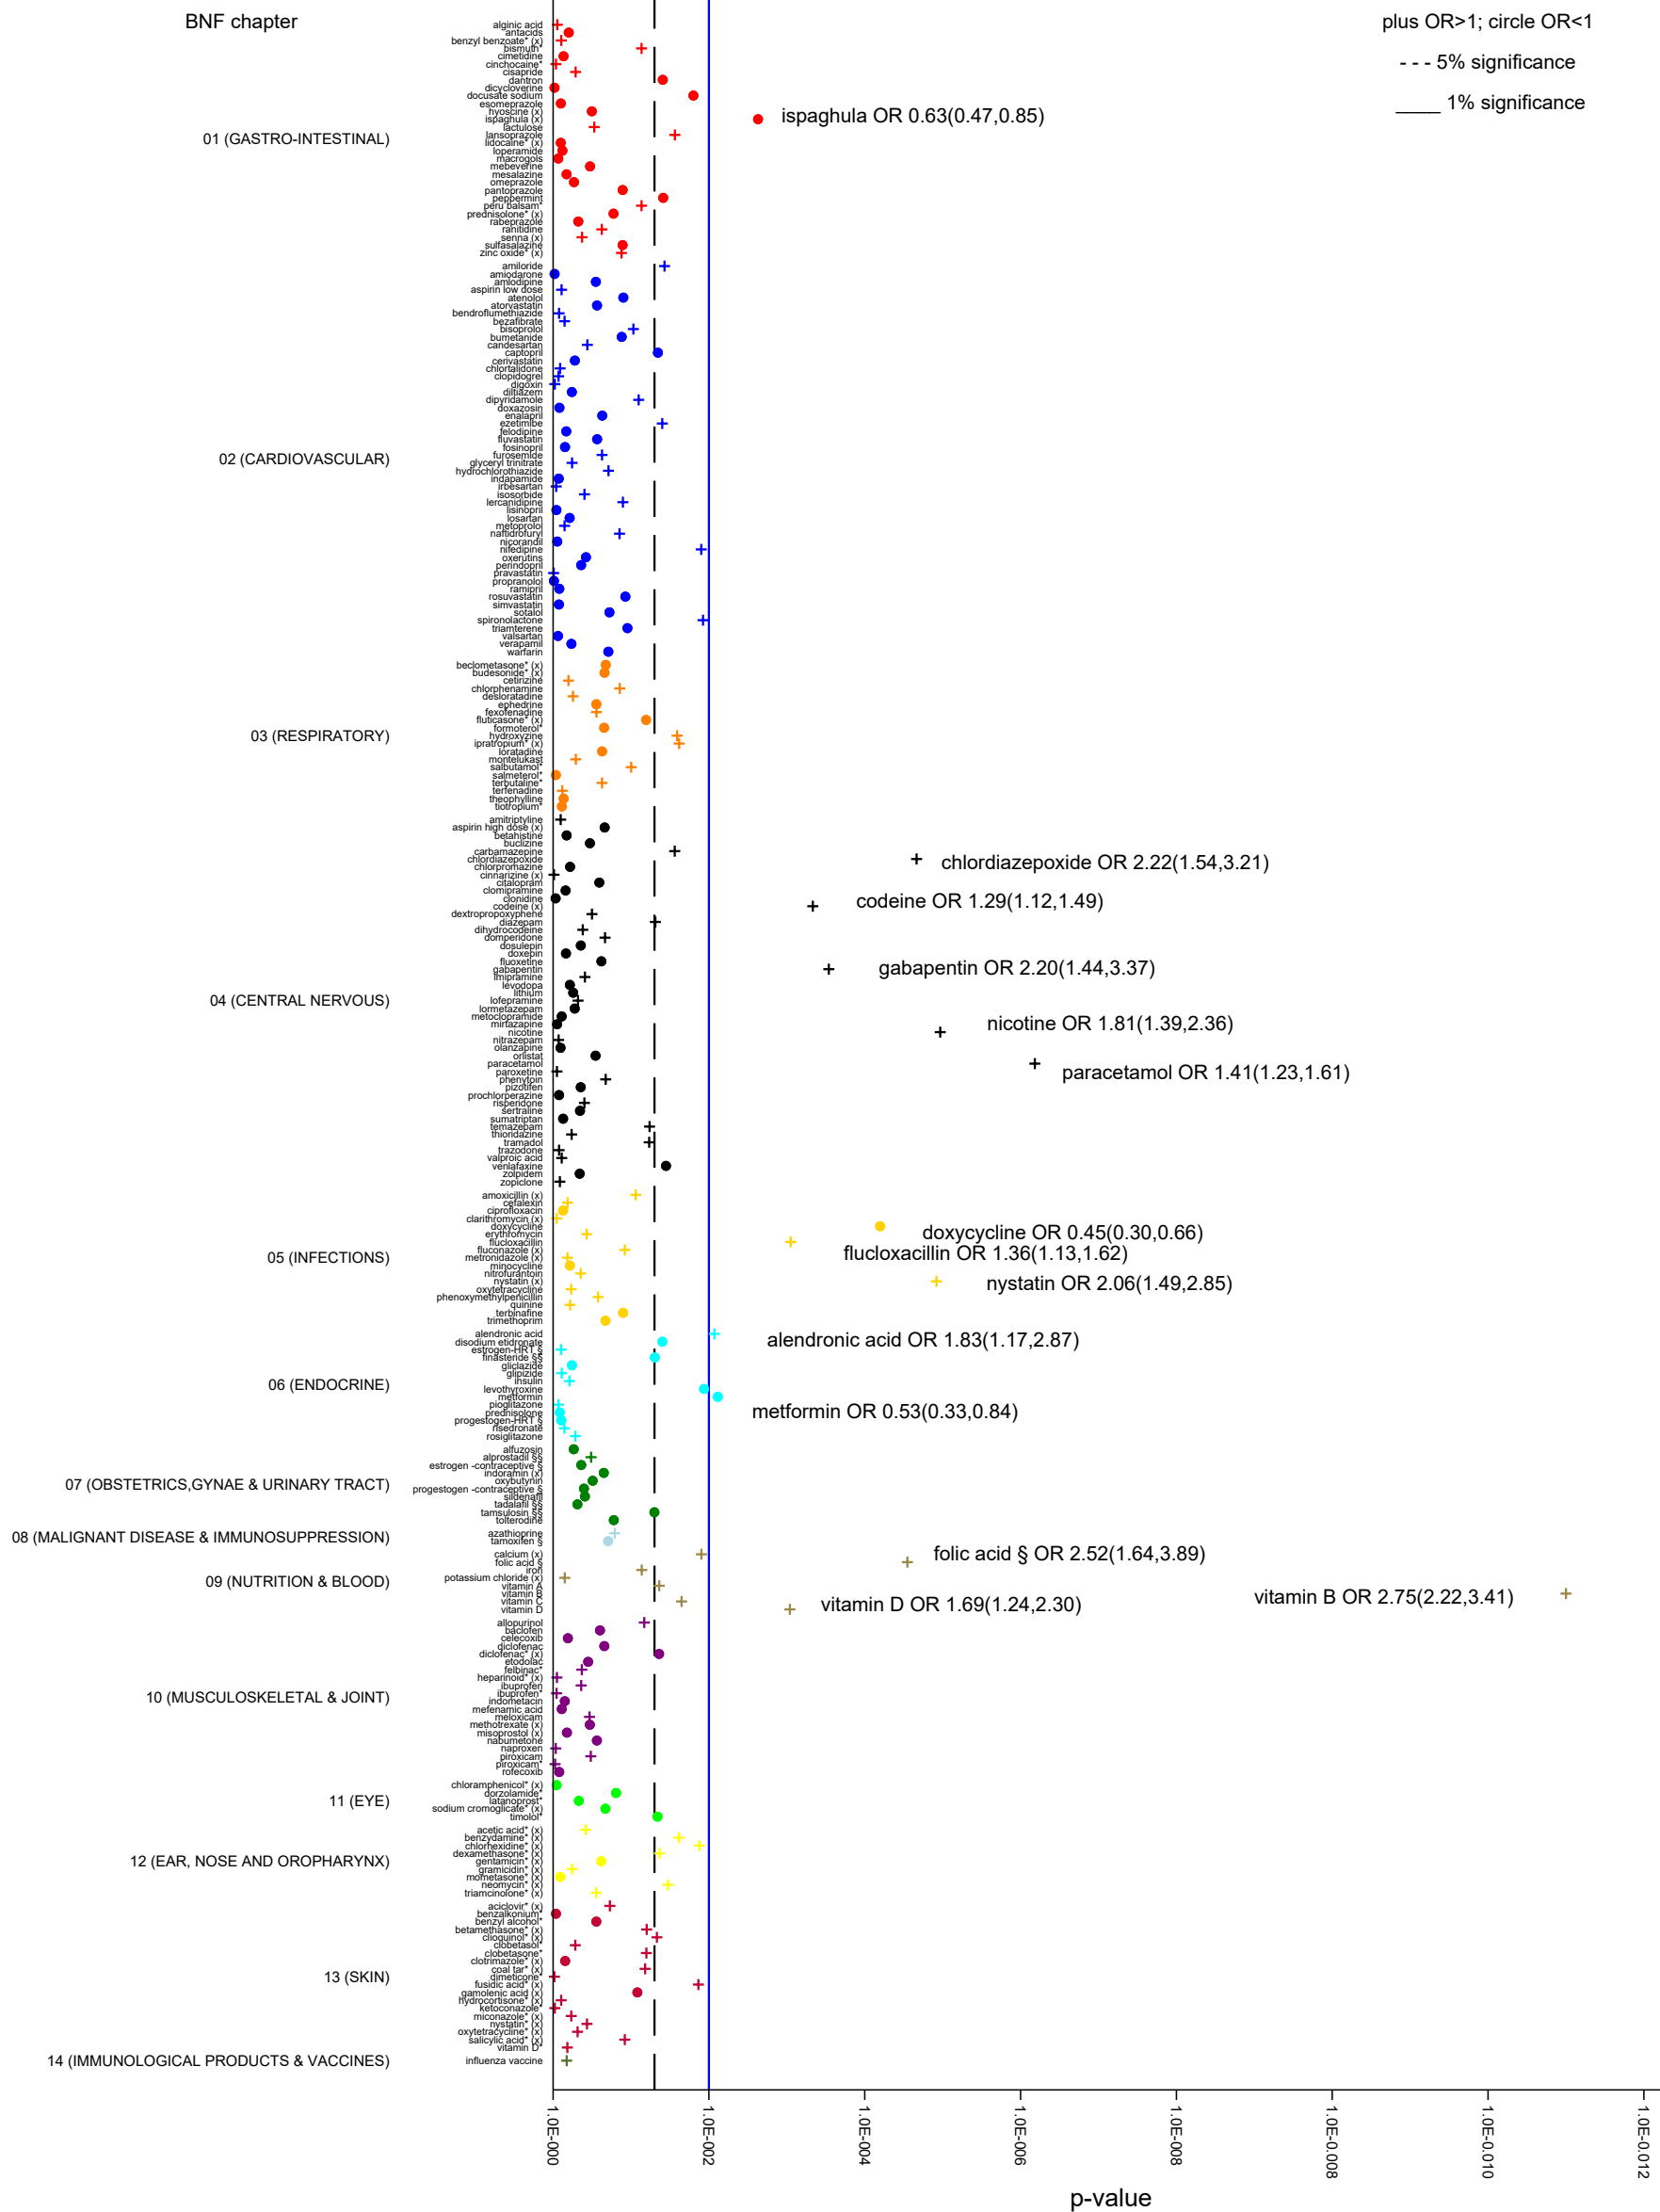

Comorbidity adjusted analysis (exposure any prescription)

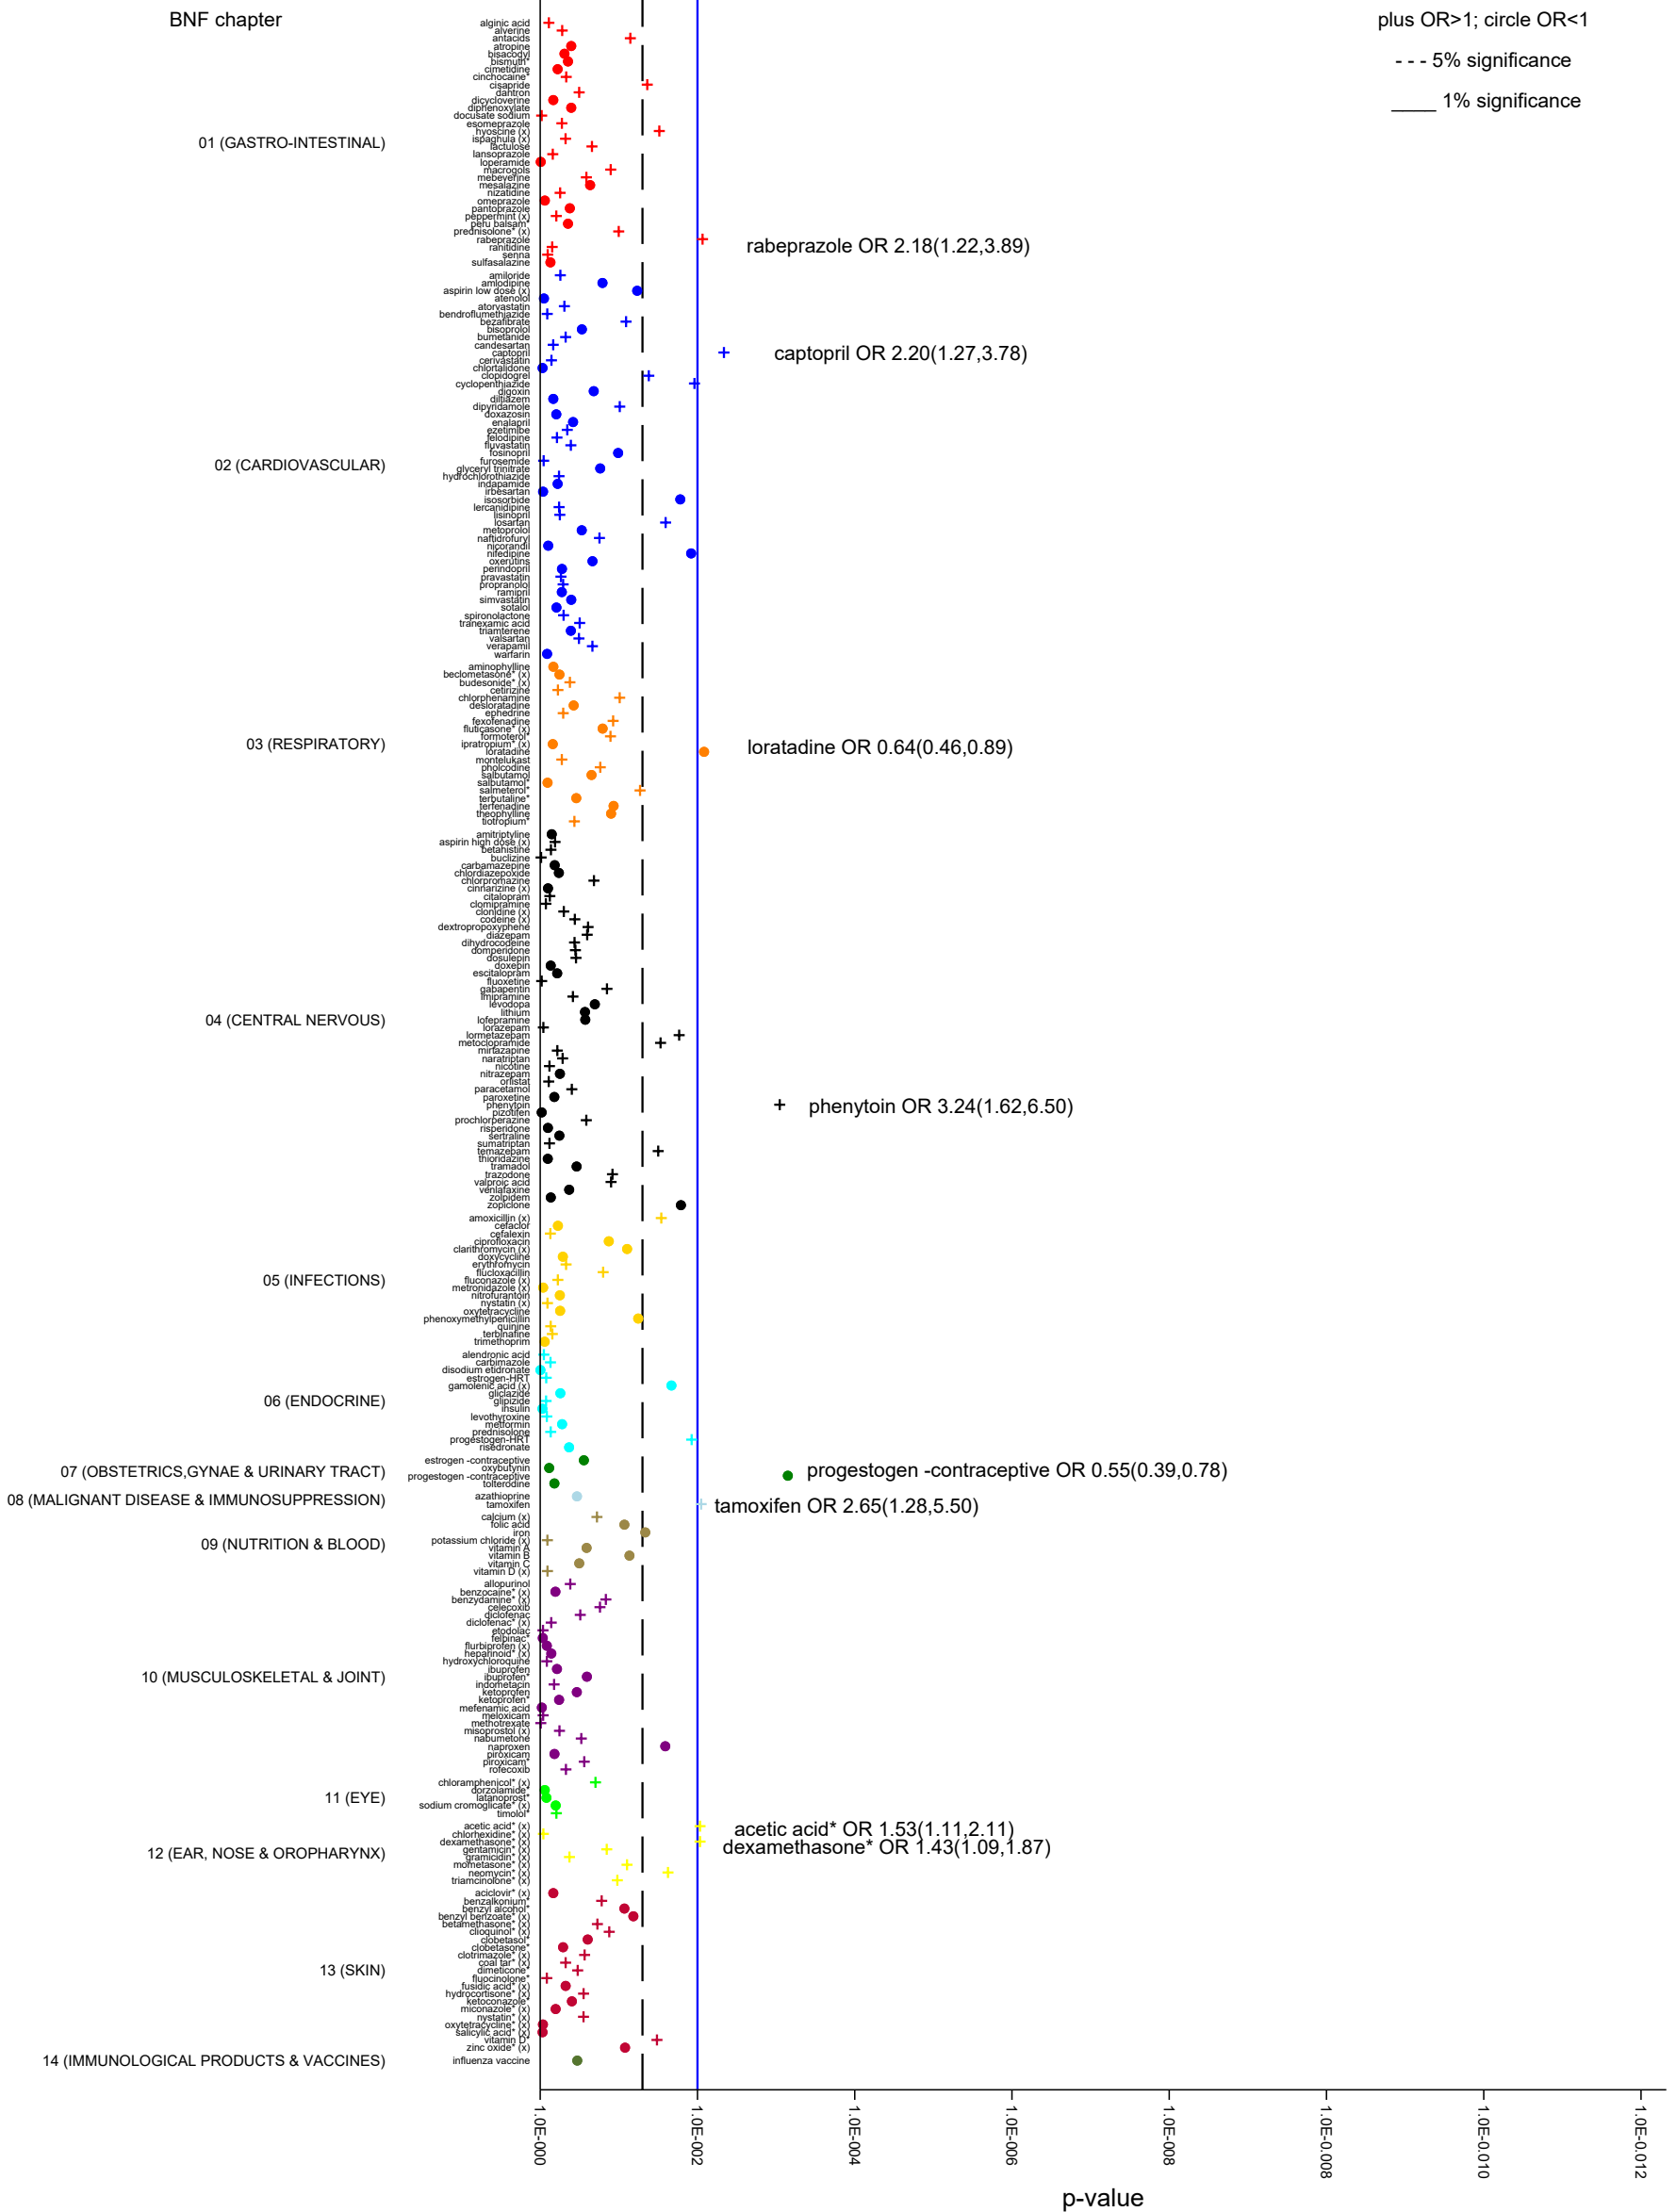

\* : local medicine; females only included in this analysis; (l): local; (x) most prevalent chapter

# MWAS plot: stomach cancer Comorbidity adjusted analysis (exposure any prescription)

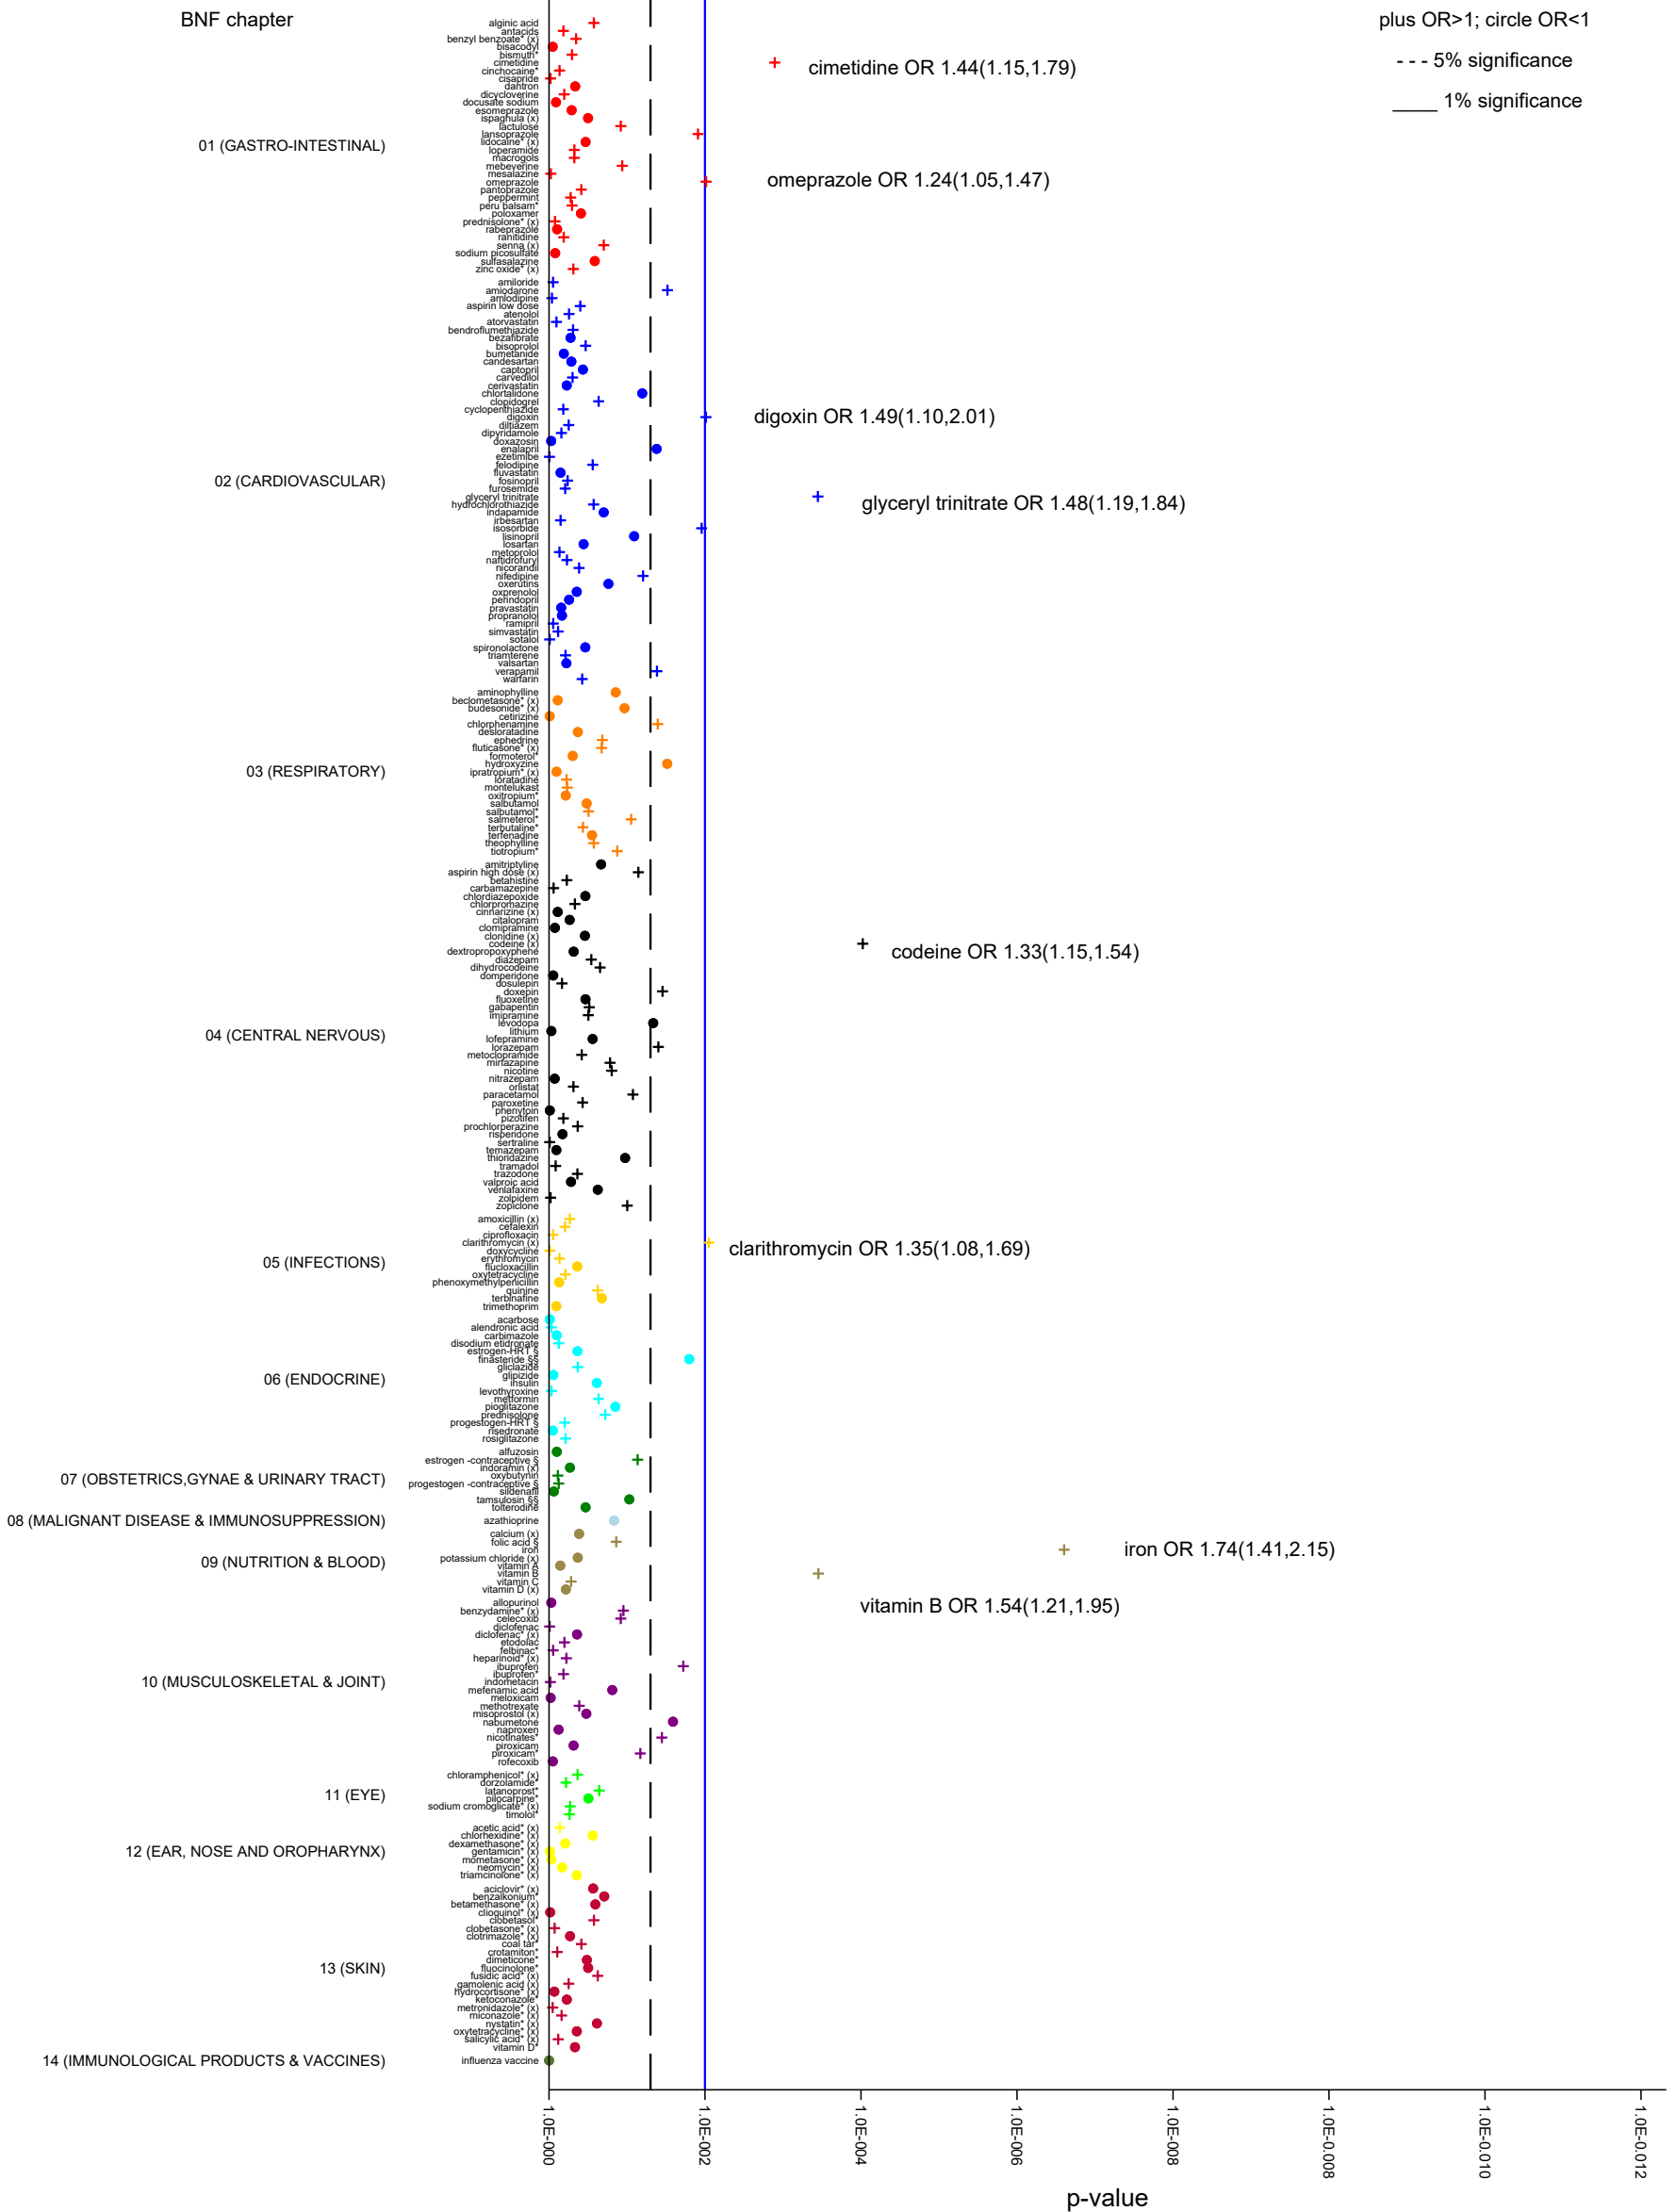

\* : local medicine; § females only; §§ males only; (x) most prevalent chapter

MWAS plot: kidney cancer  
Comorbidity adjusted analysis (exposure any prescription)

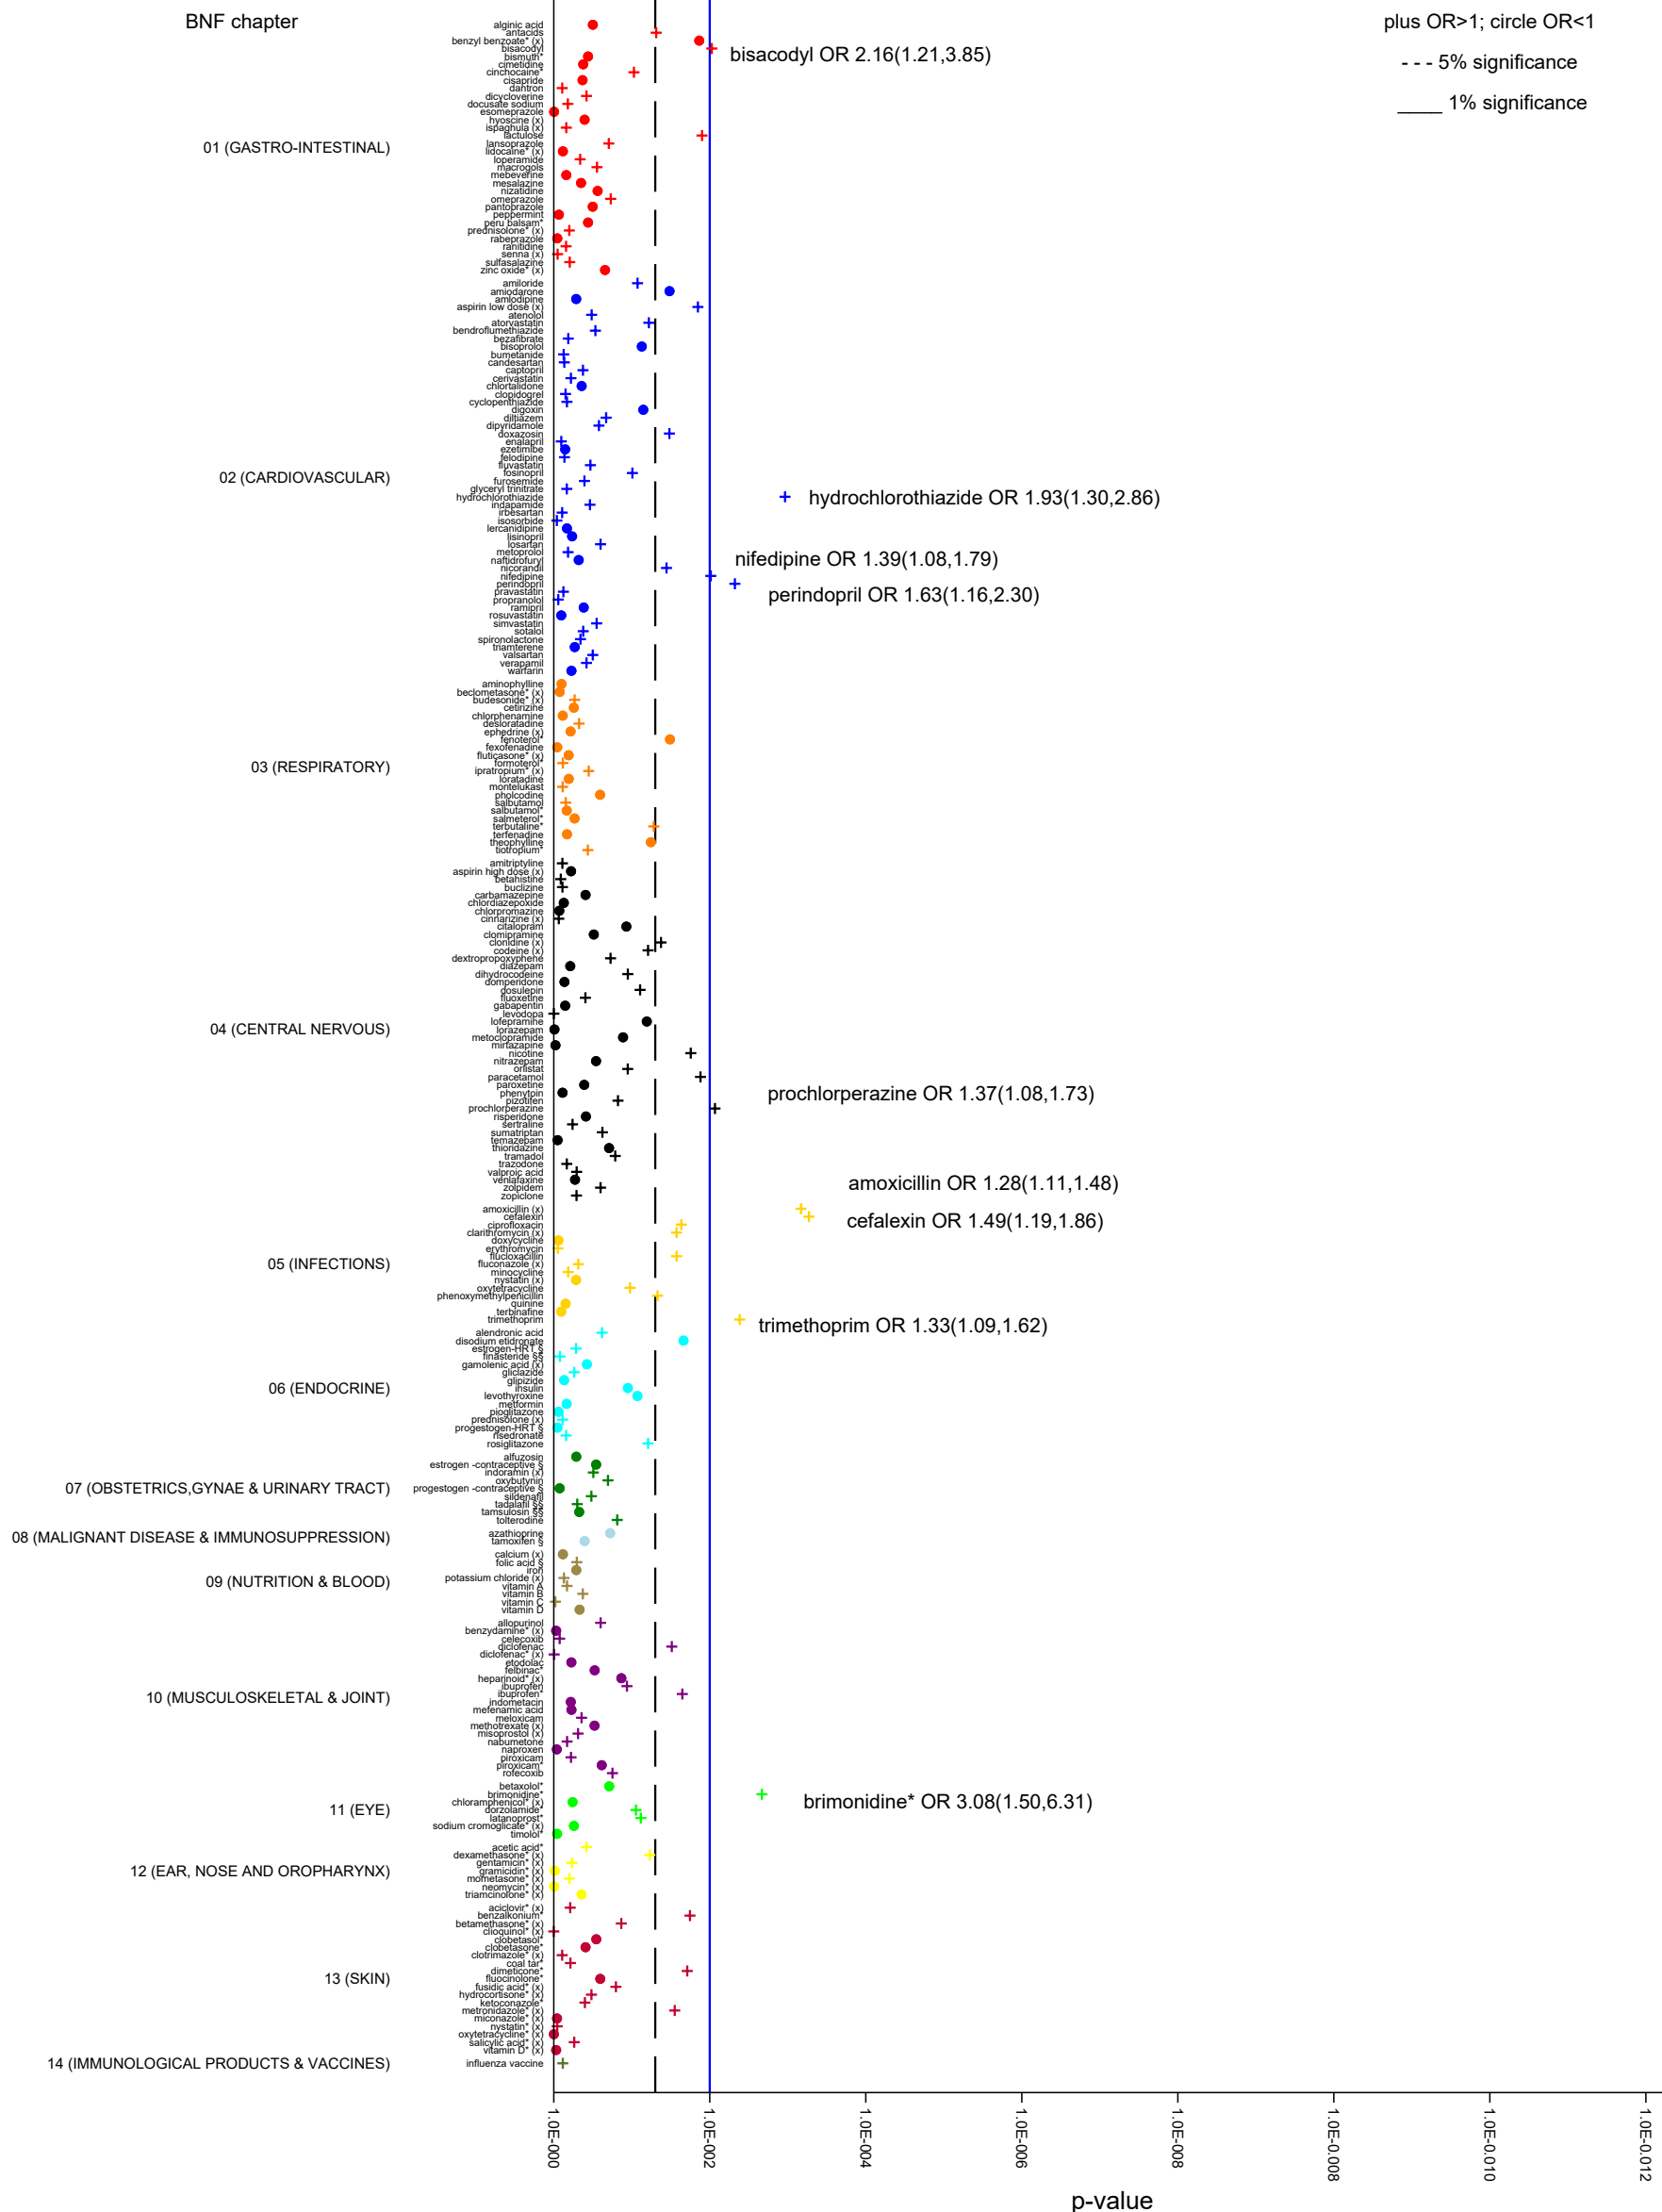

MWAS plot: cervical & other gynae cancer  
Comorbidity adjusted analysis (exposure any prescription)

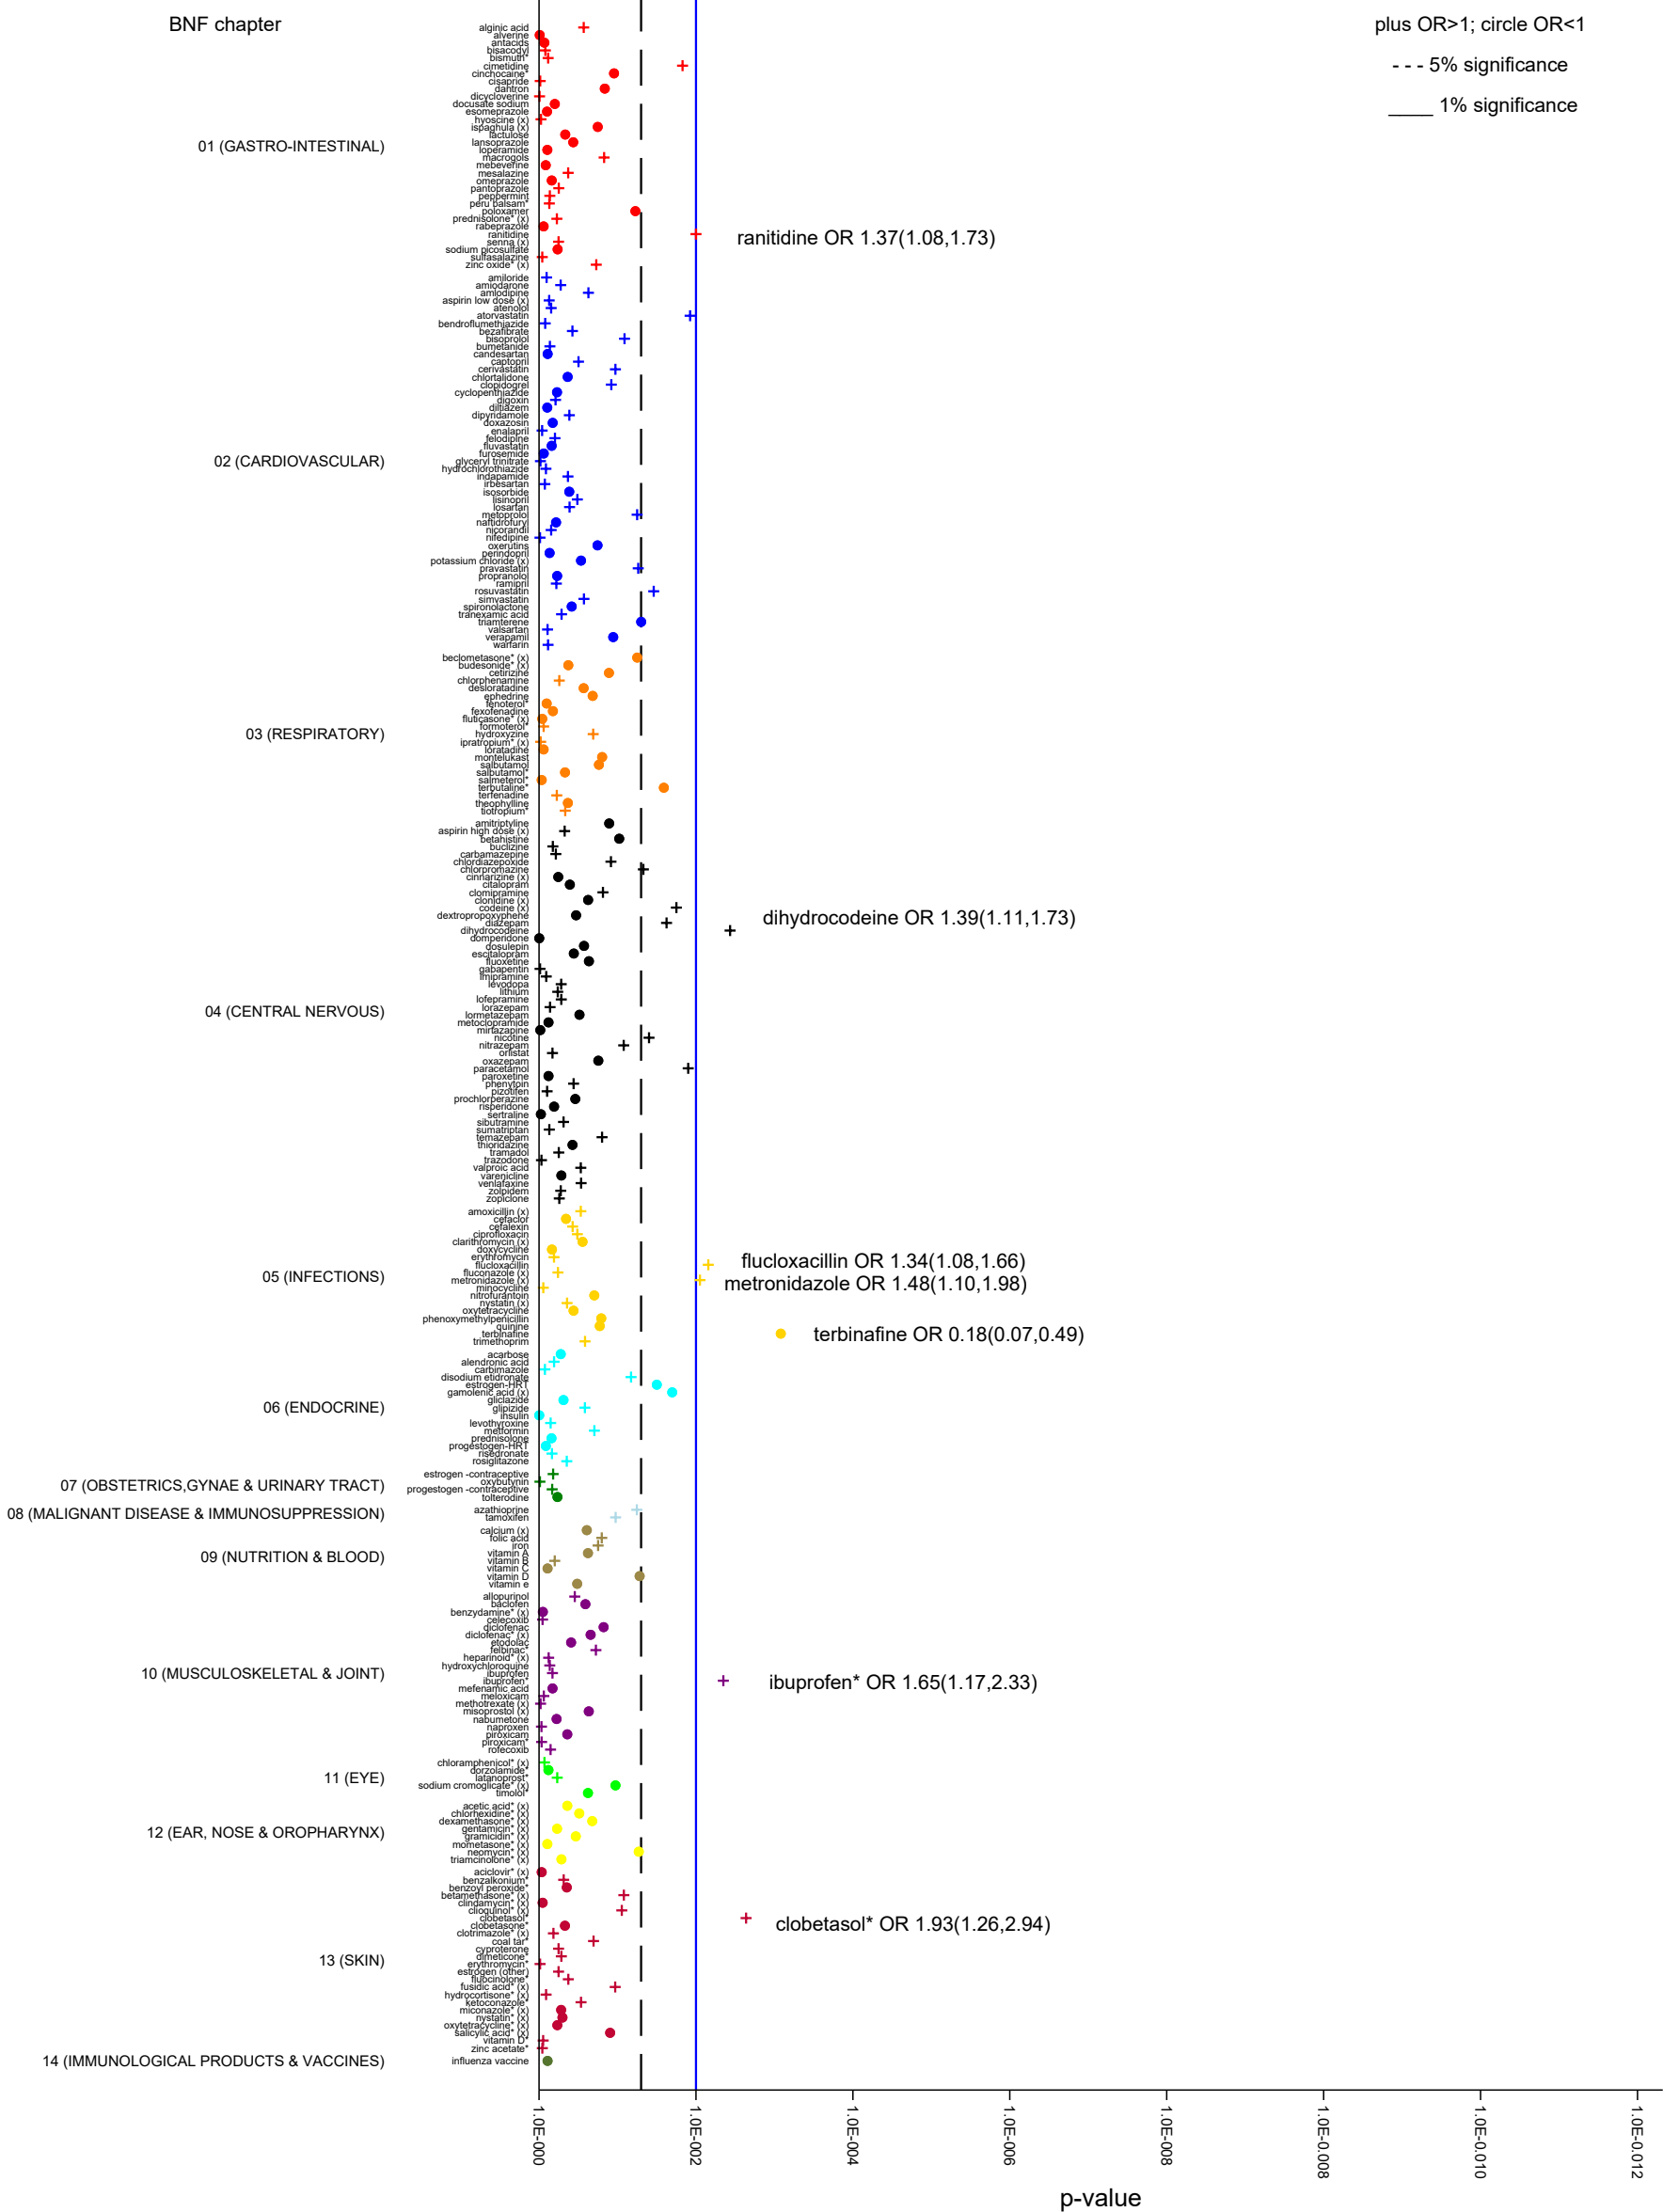

\* : local medicine; females only included in this analysis; (l): local; (x) most prevalent chapter



Forest plot: pancreatic cancer  
Comorbidity adjusted analysis (exposure any prescription)

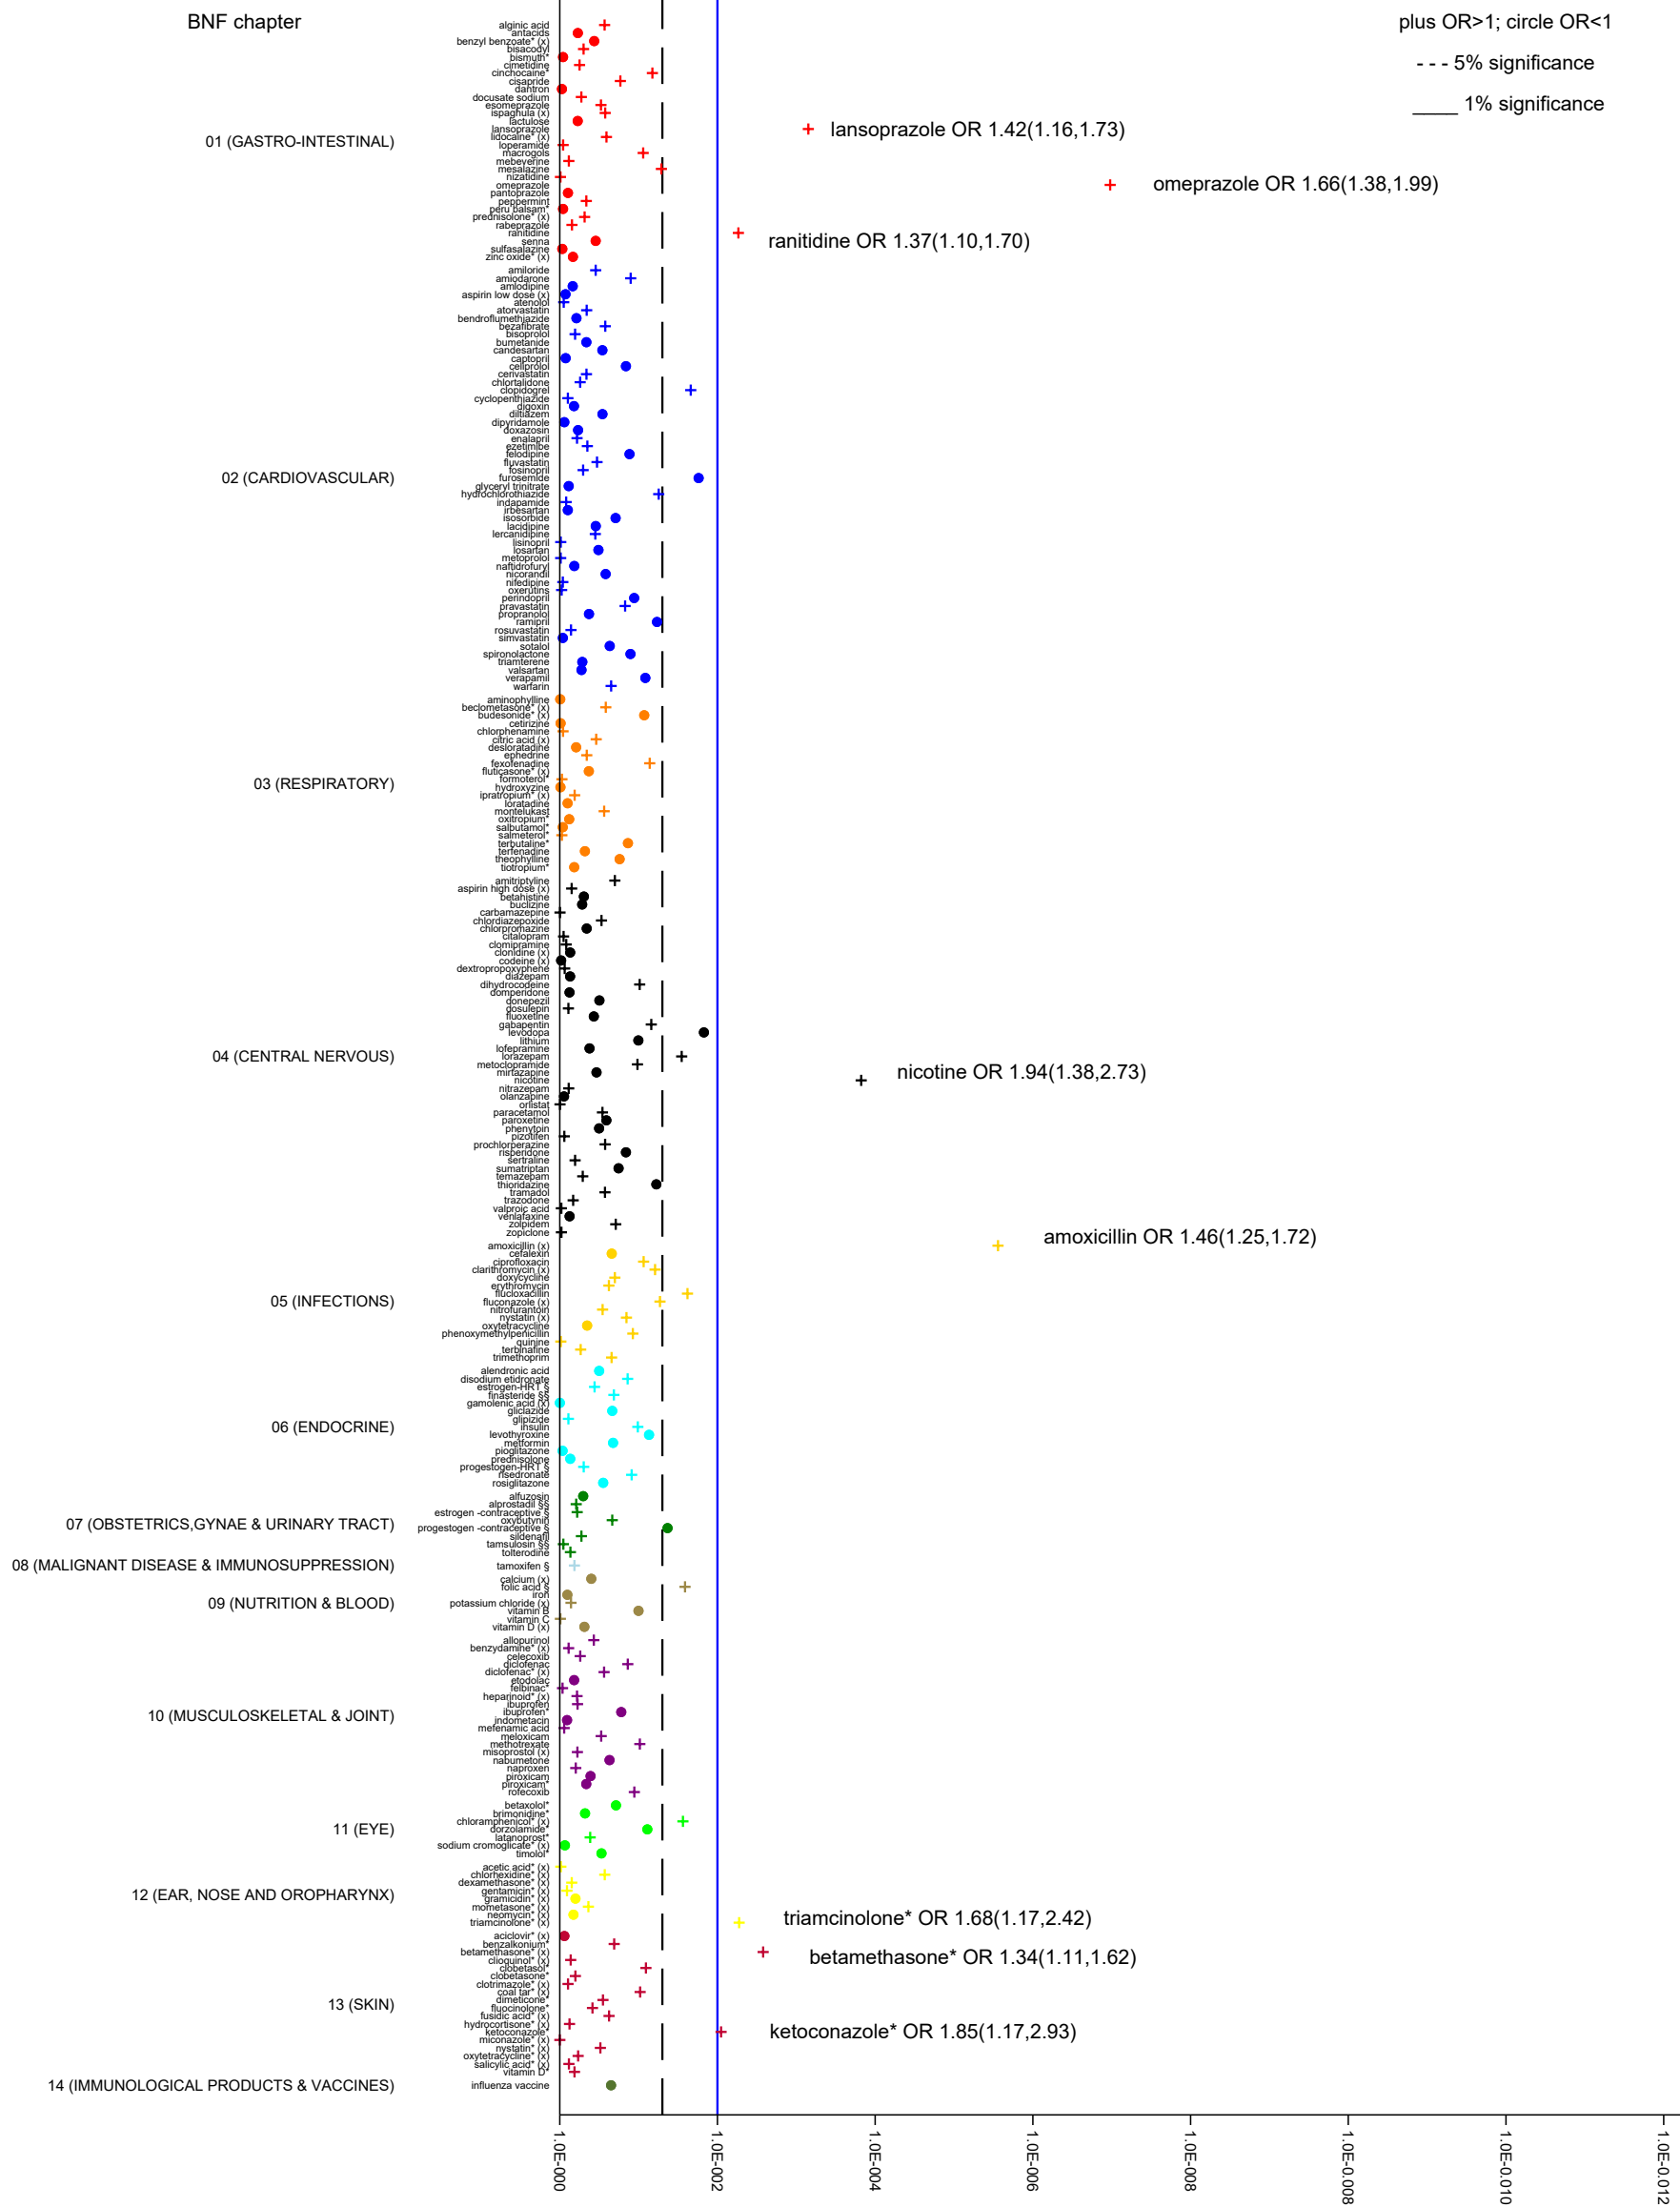

\* : local medicine; § females only; §§ males only; (x) most prevalent chapter

Comorbidity adjusted analysis (exposure any prescription)

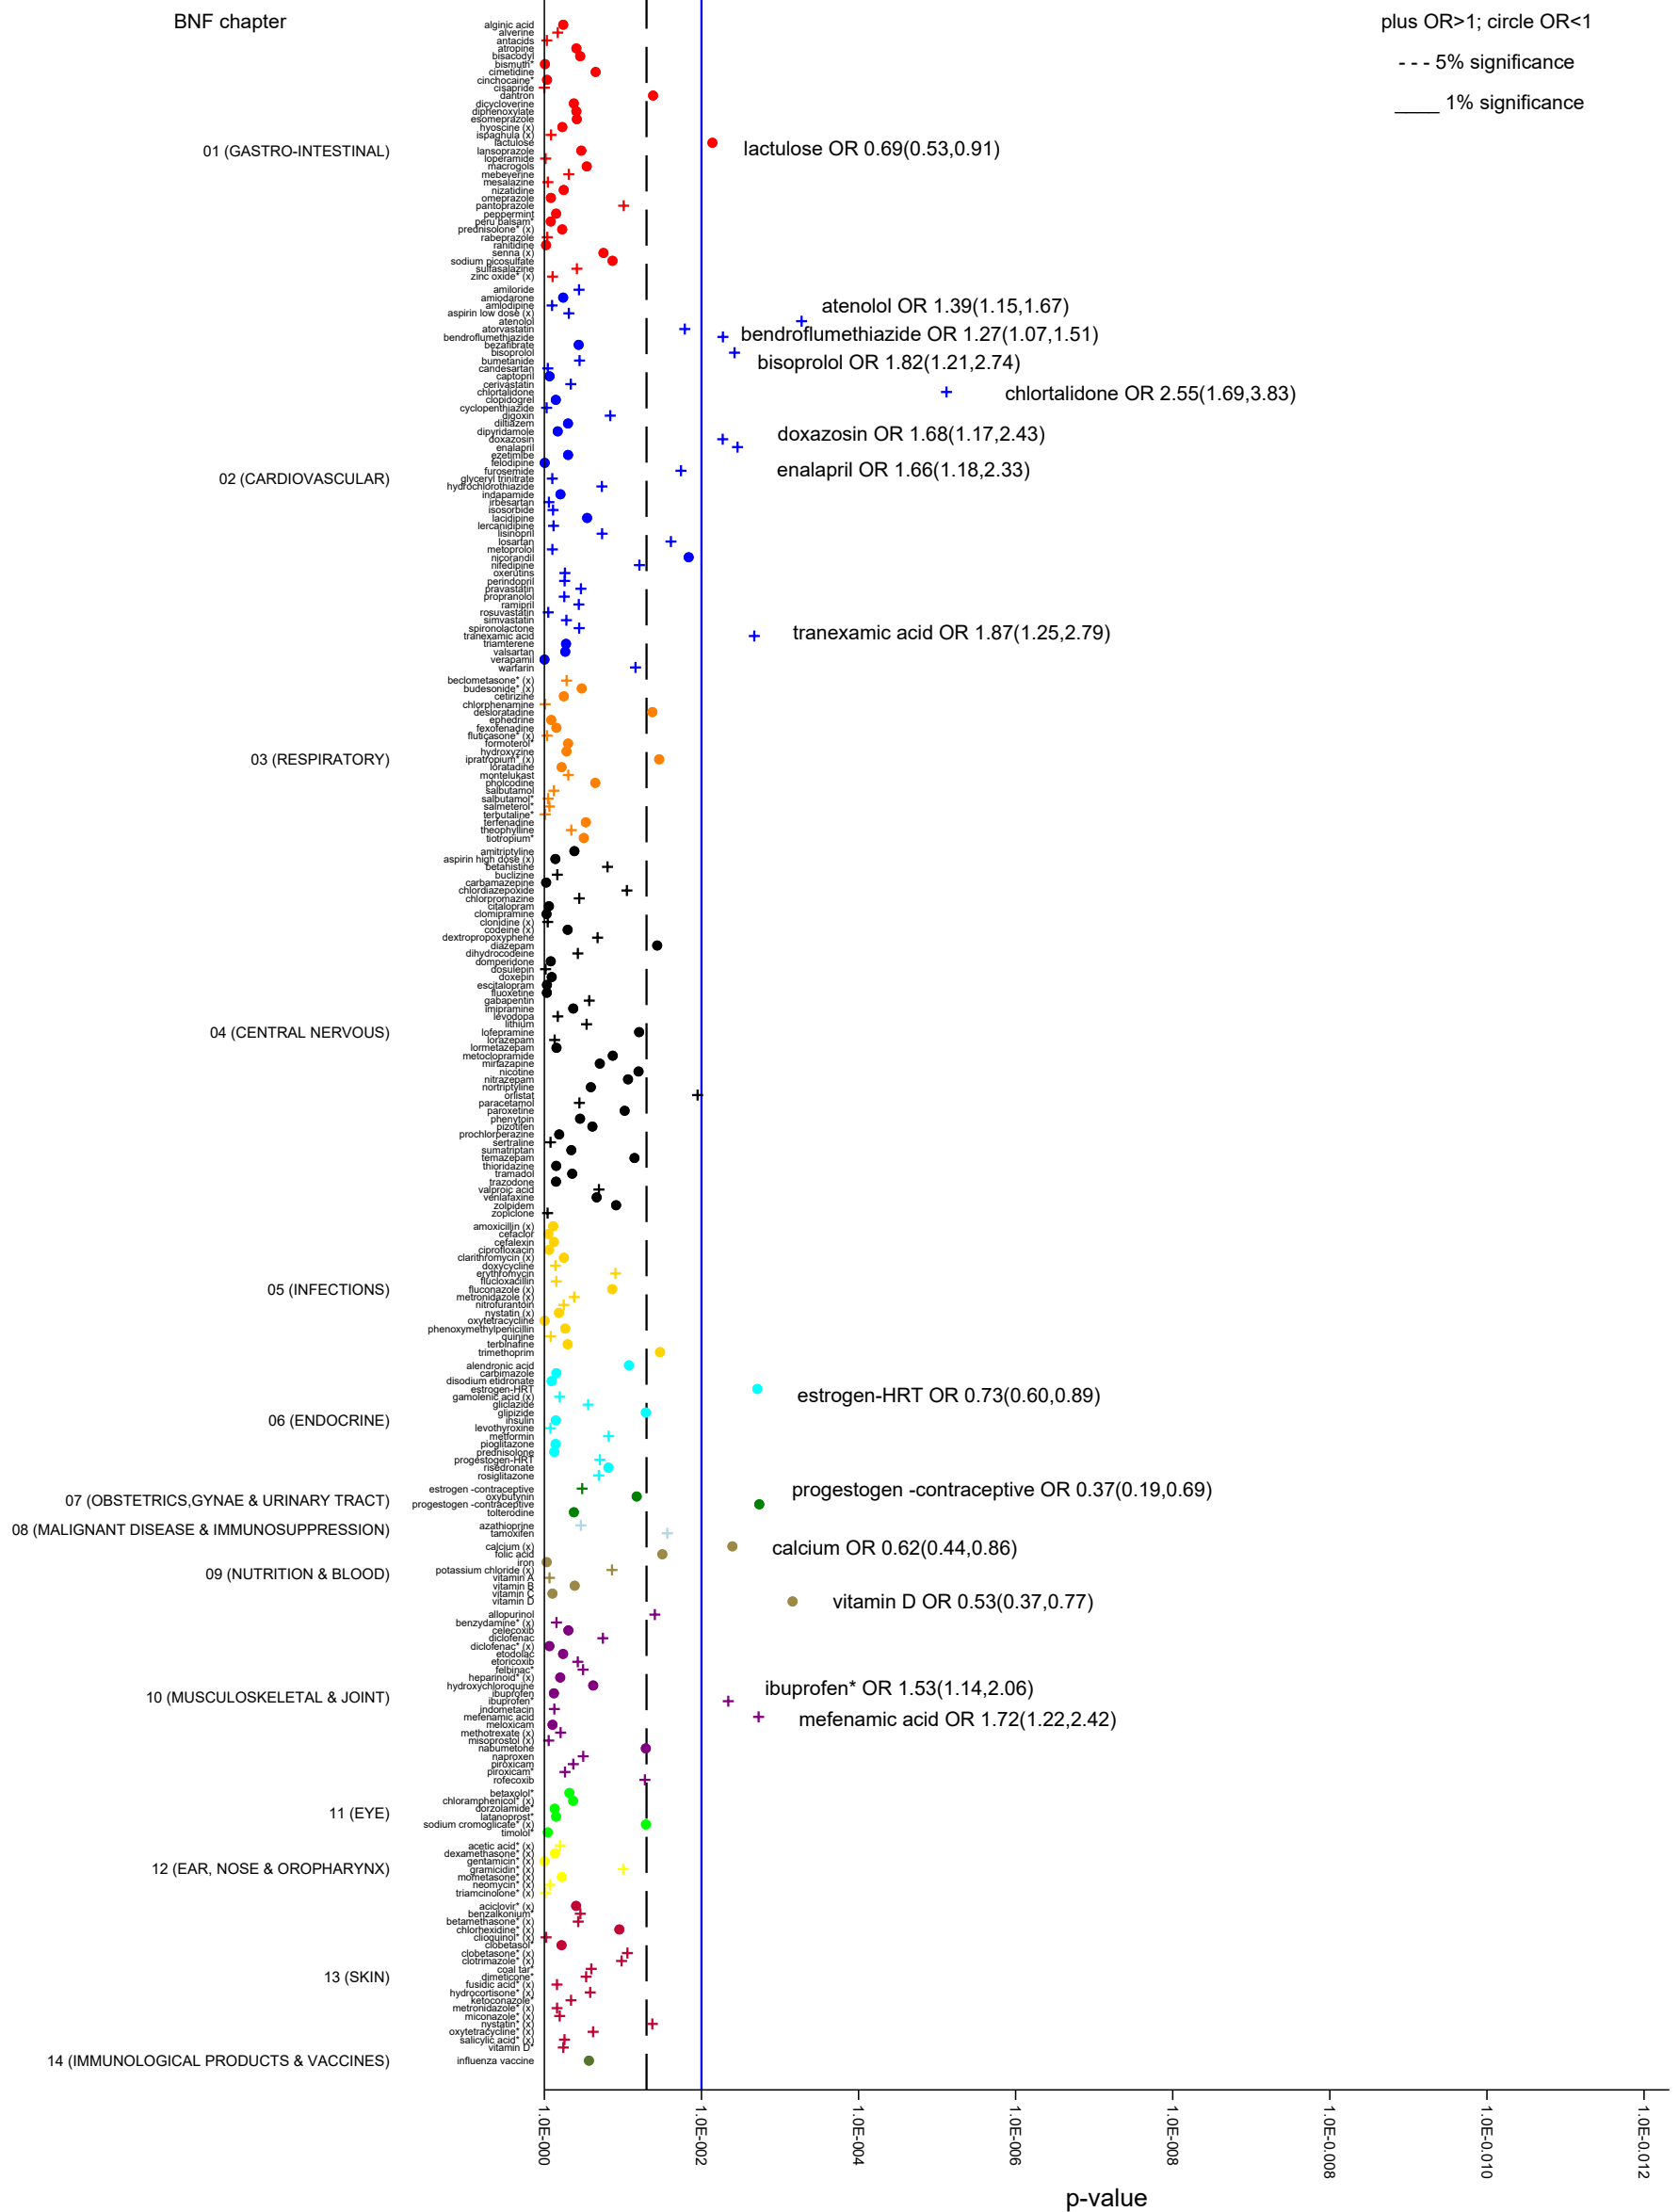

\* : local medicine; females only included in this analysis; (l): local; (x) most prevalent chapter

MWAS plot: cancer of the brain and central nervous system  
Comorbidity adjusted analysis (exposure any prescription)

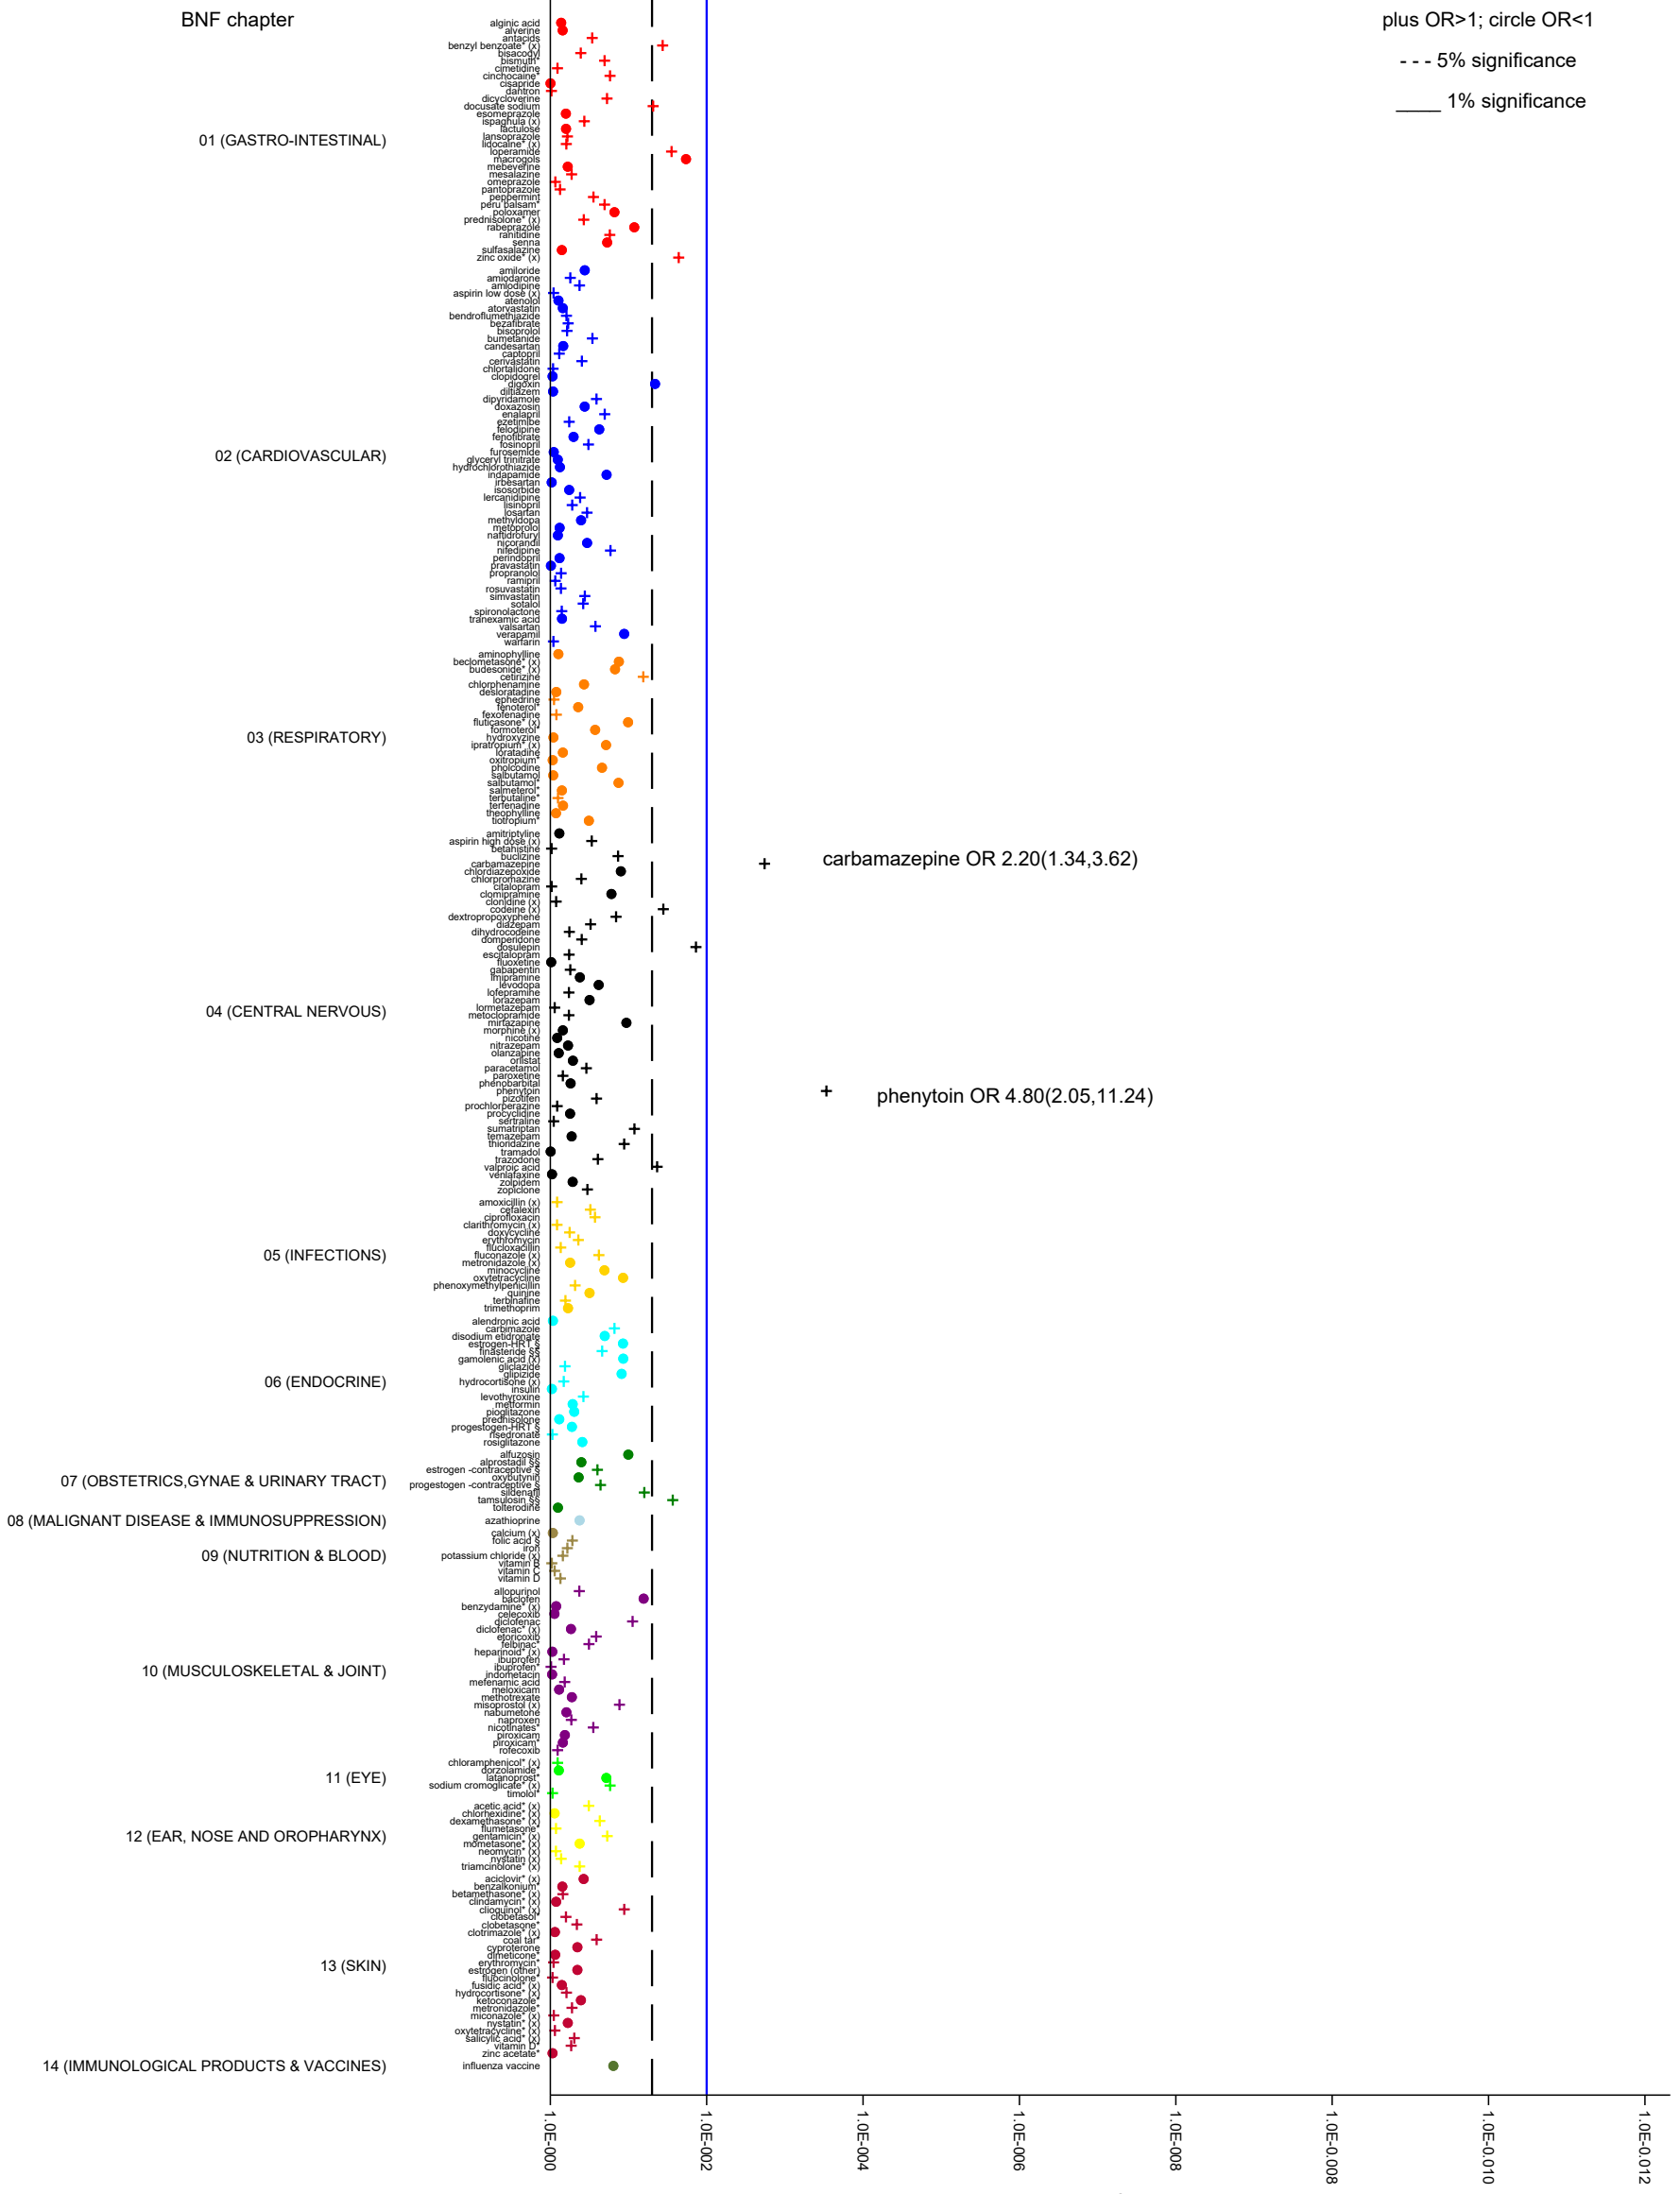

\* : local medicine; § females only; §§ males only; (x) most prevalent chapter

Comorbidity adjusted analysis (exposure any prescription)

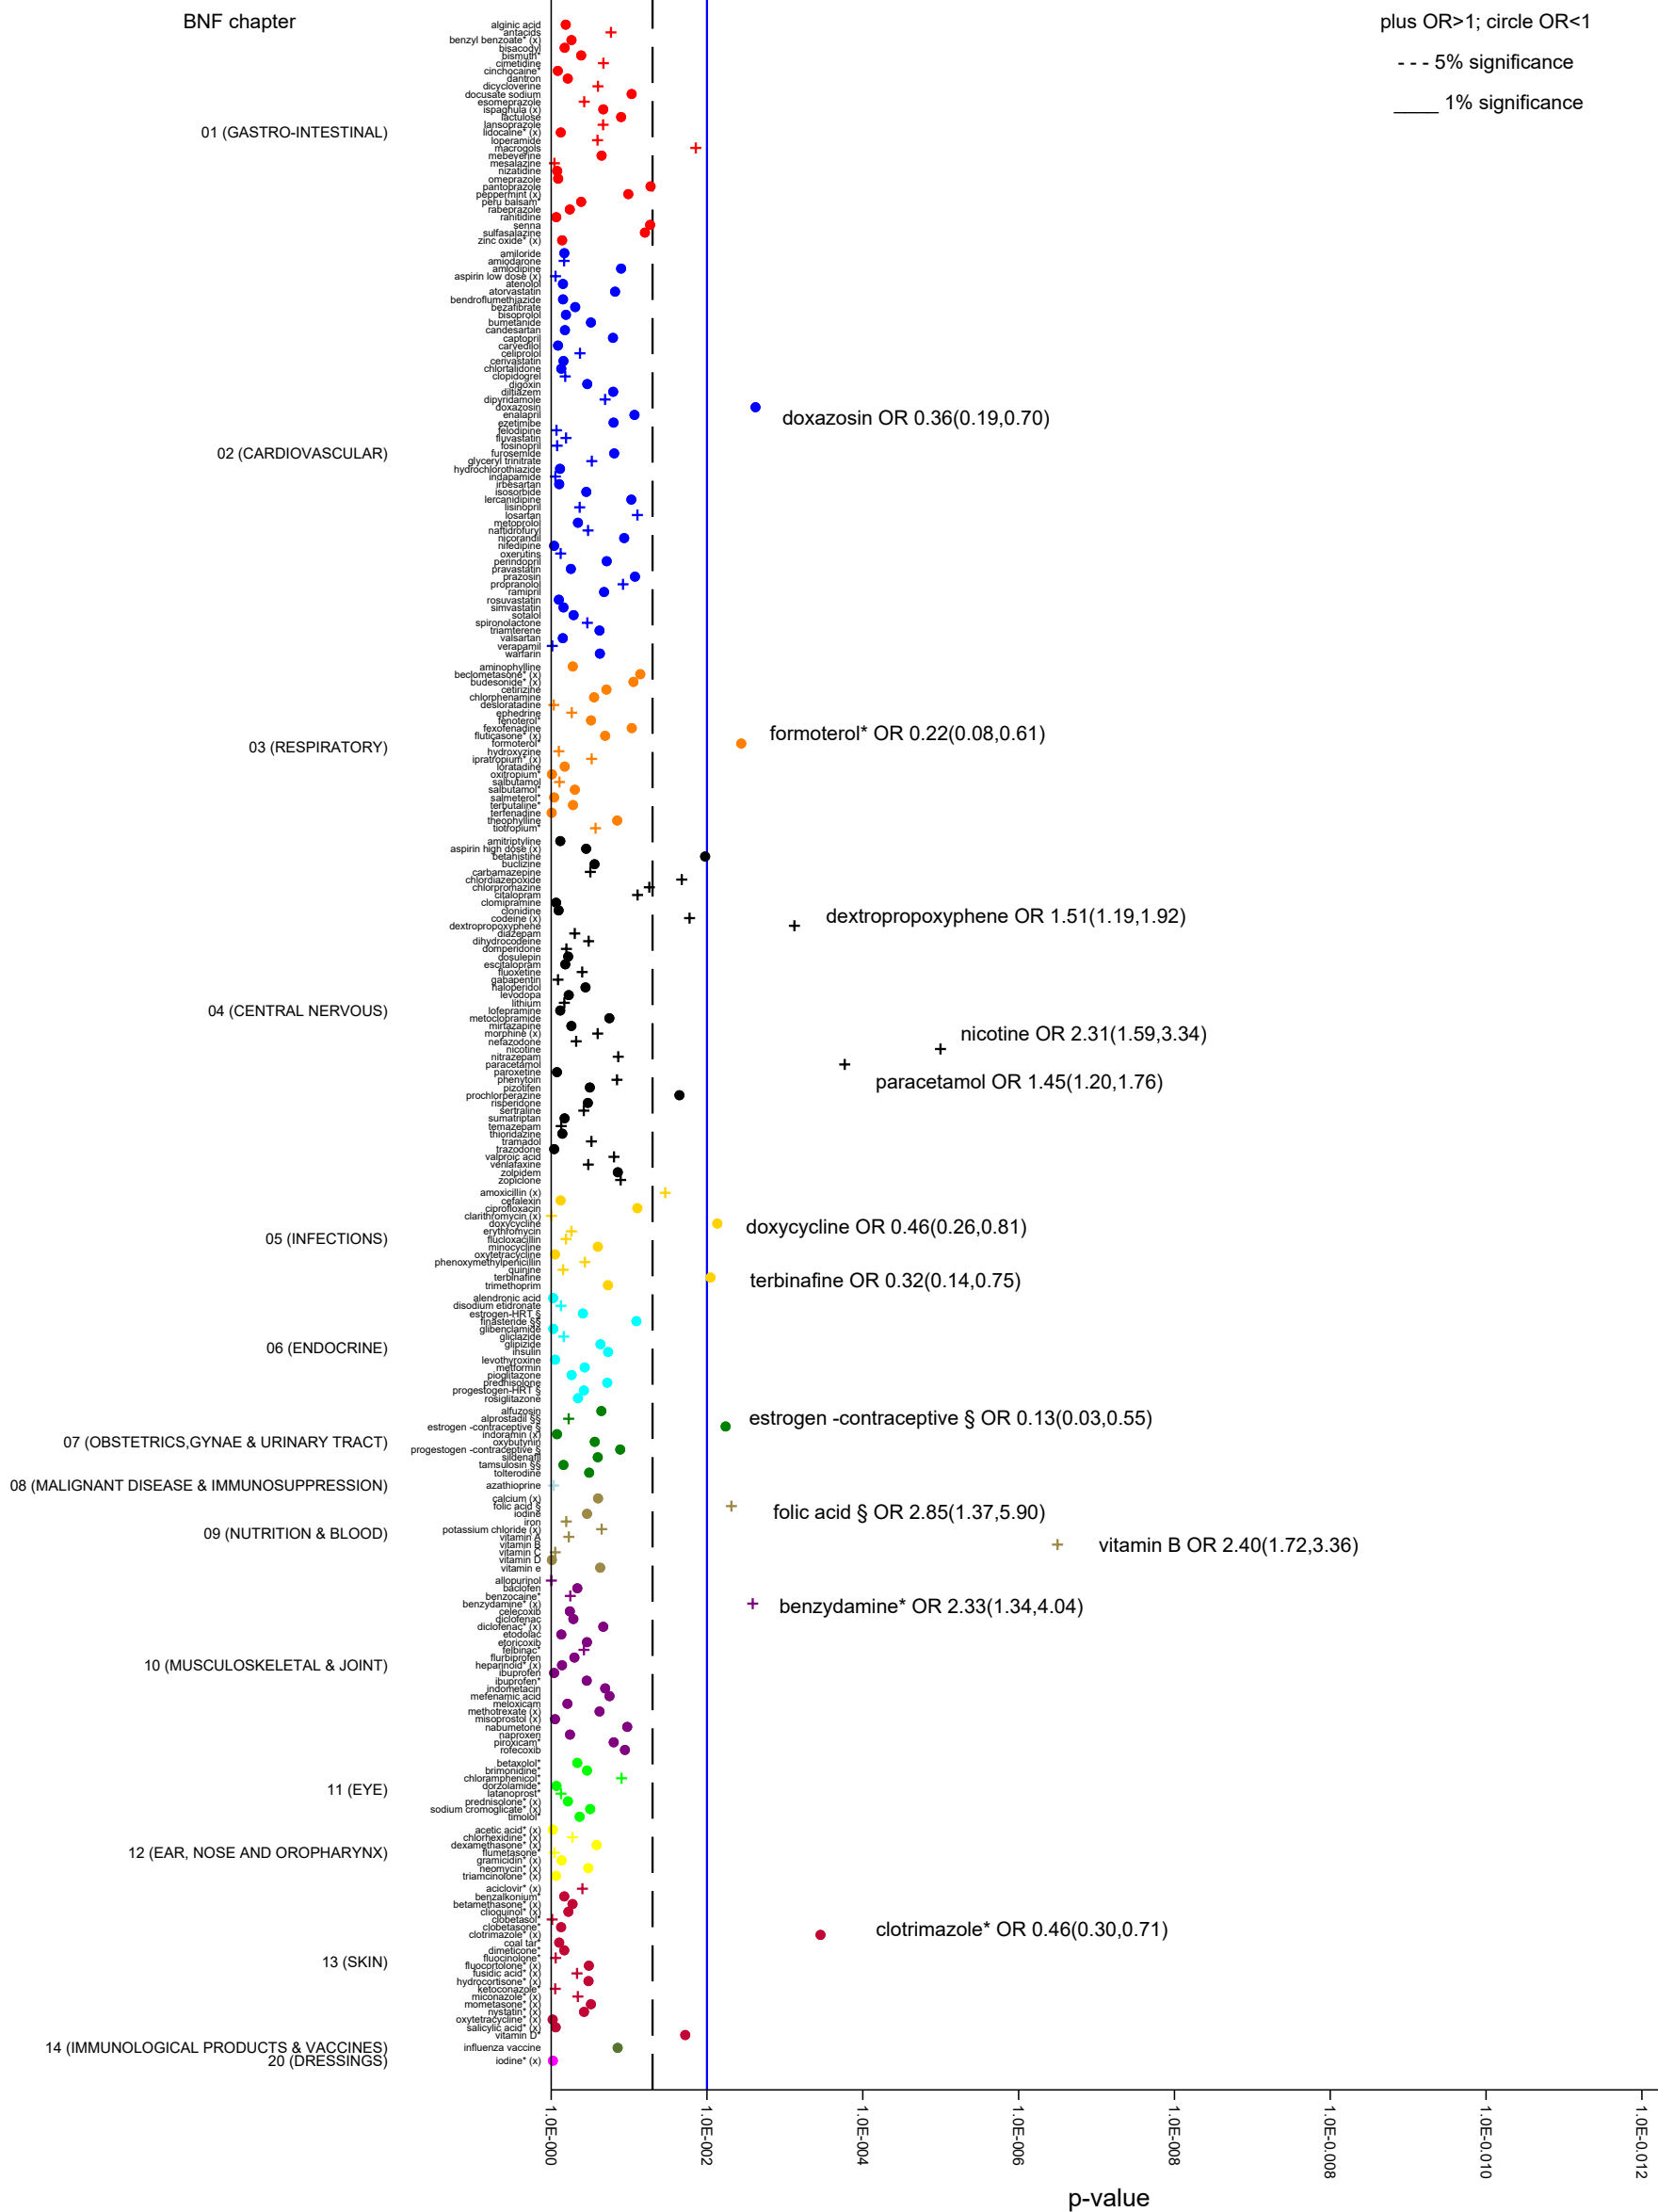

\* : local medicine; § females only; §§ males only; (x) most prevalent chapter

MWAS plot: multiple myeloma  
Comorbidity adjusted analysis (exposure any prescription)

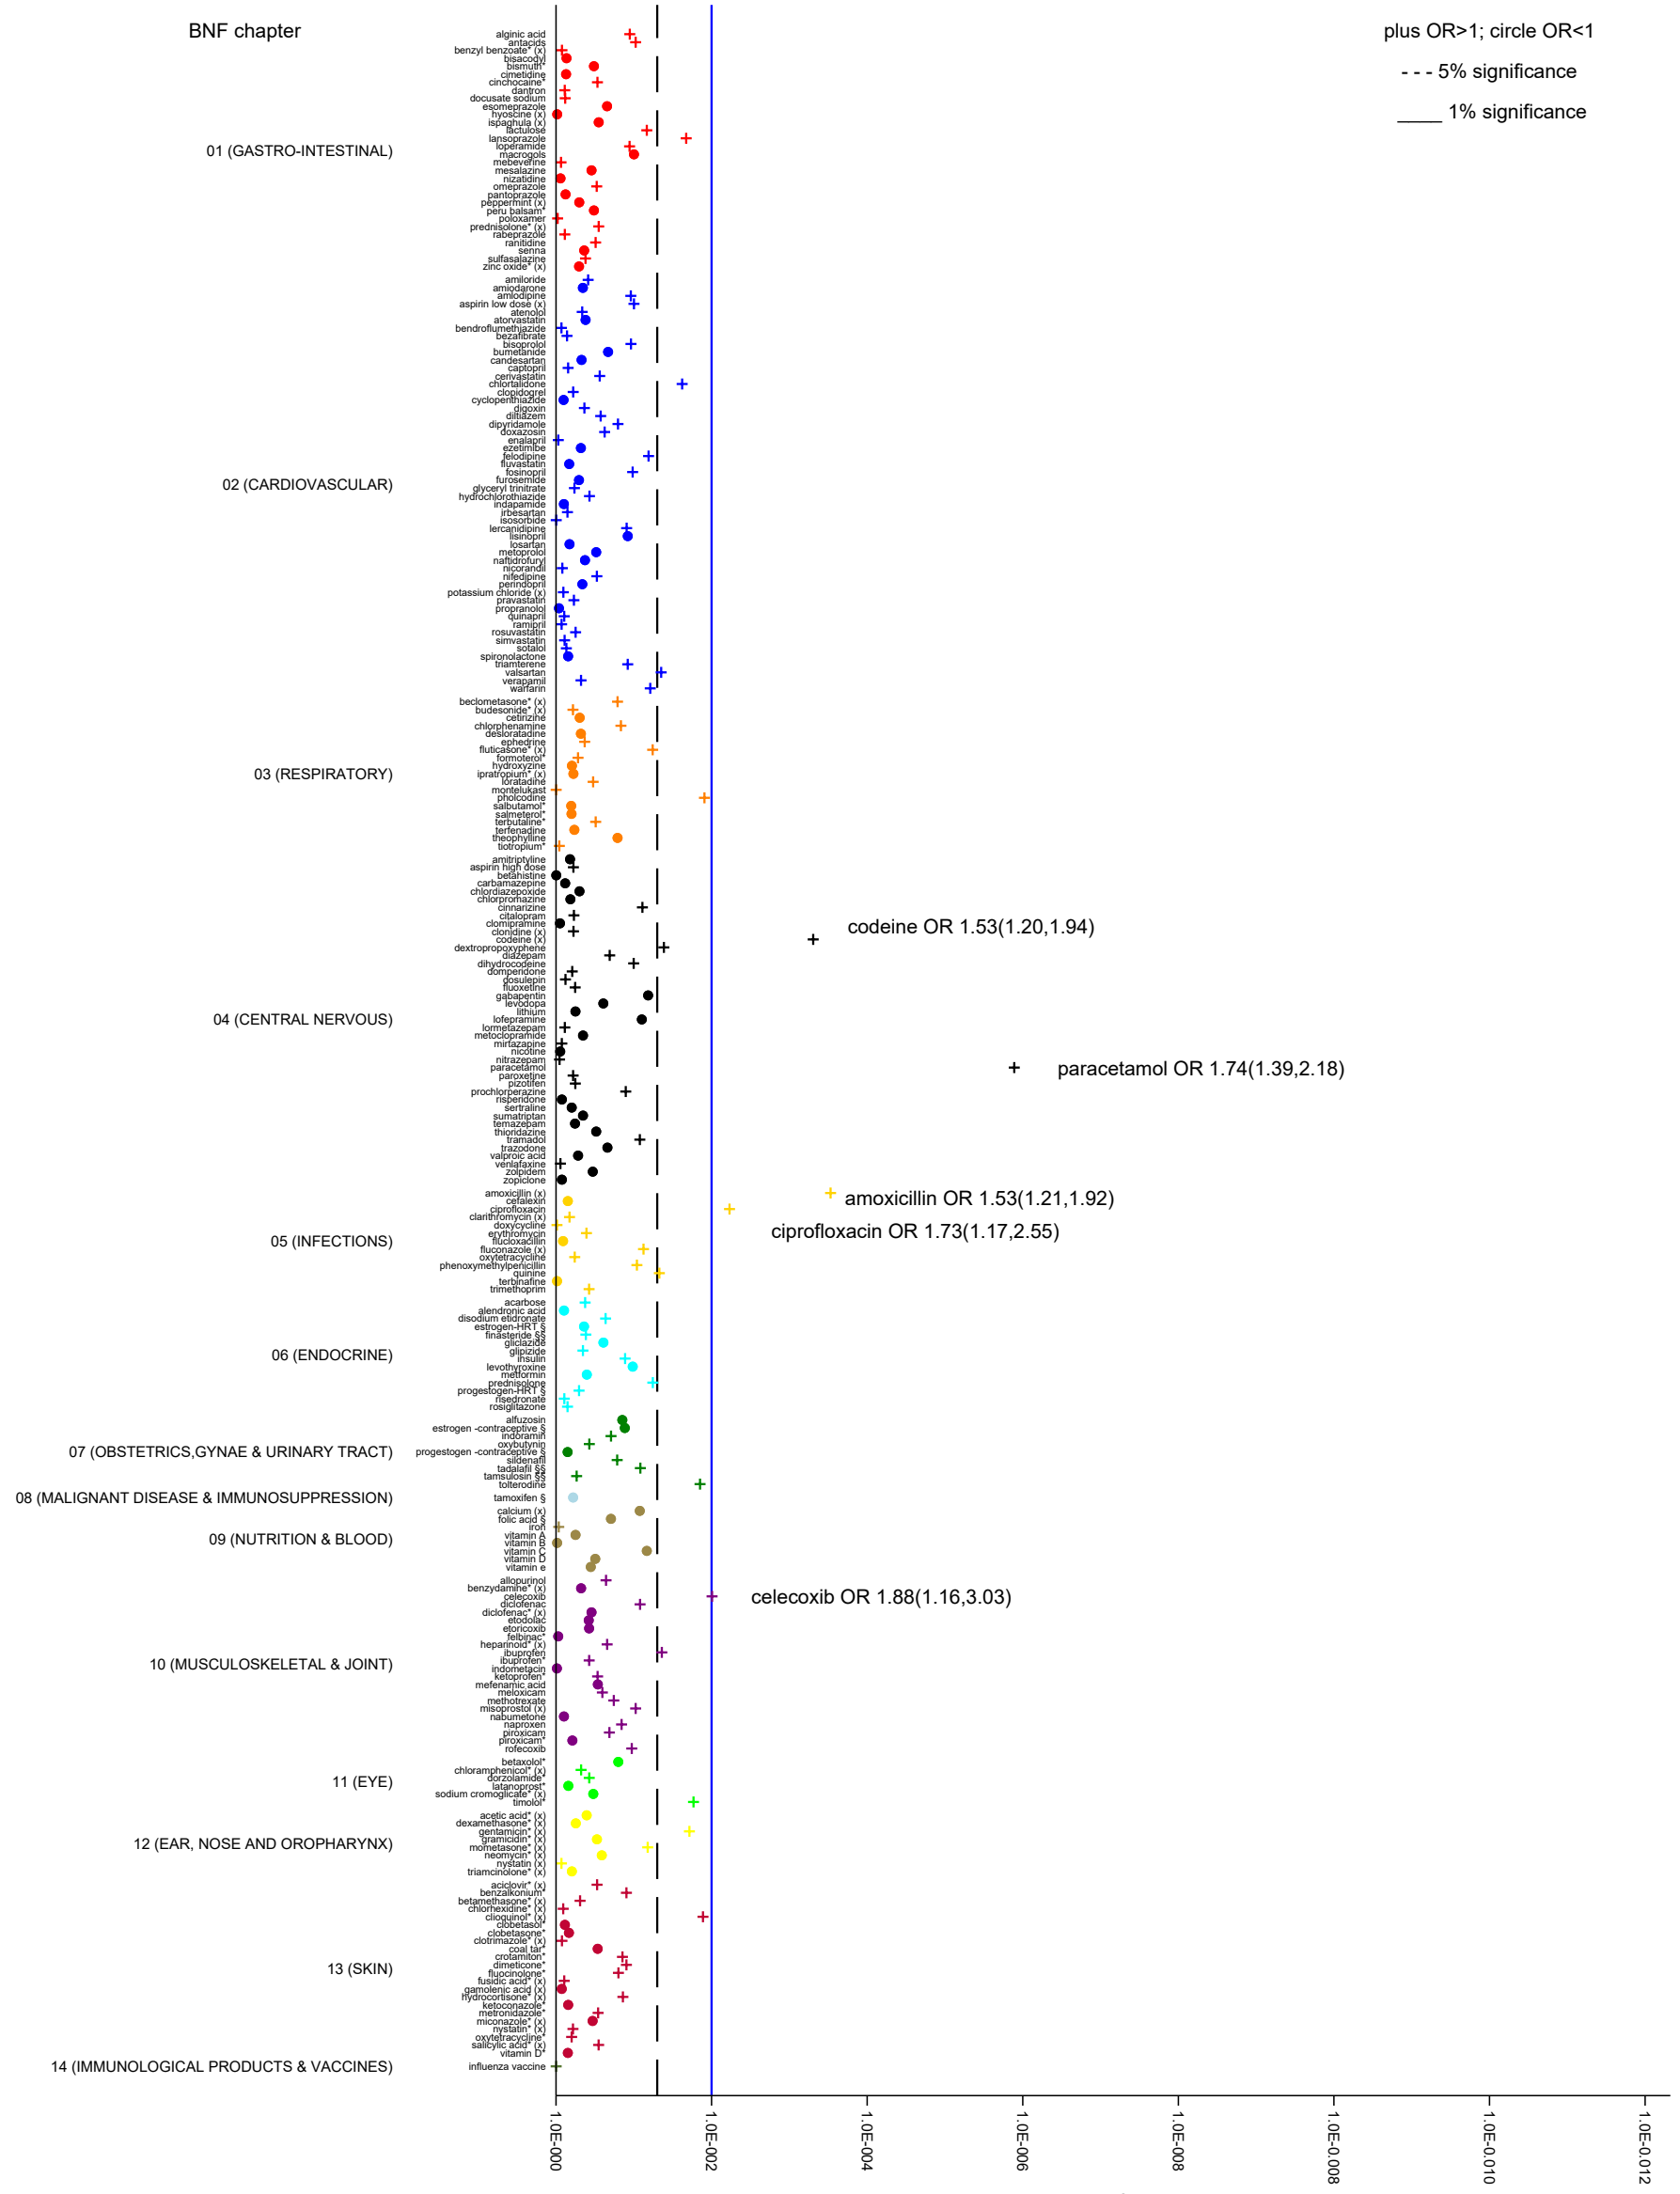

\* : local medicine; § females only; §§ males only; (x) most prevalent chapter

# MWAS plot: liver cancer Comorbidity adjusted analysis (exposure any prescription)

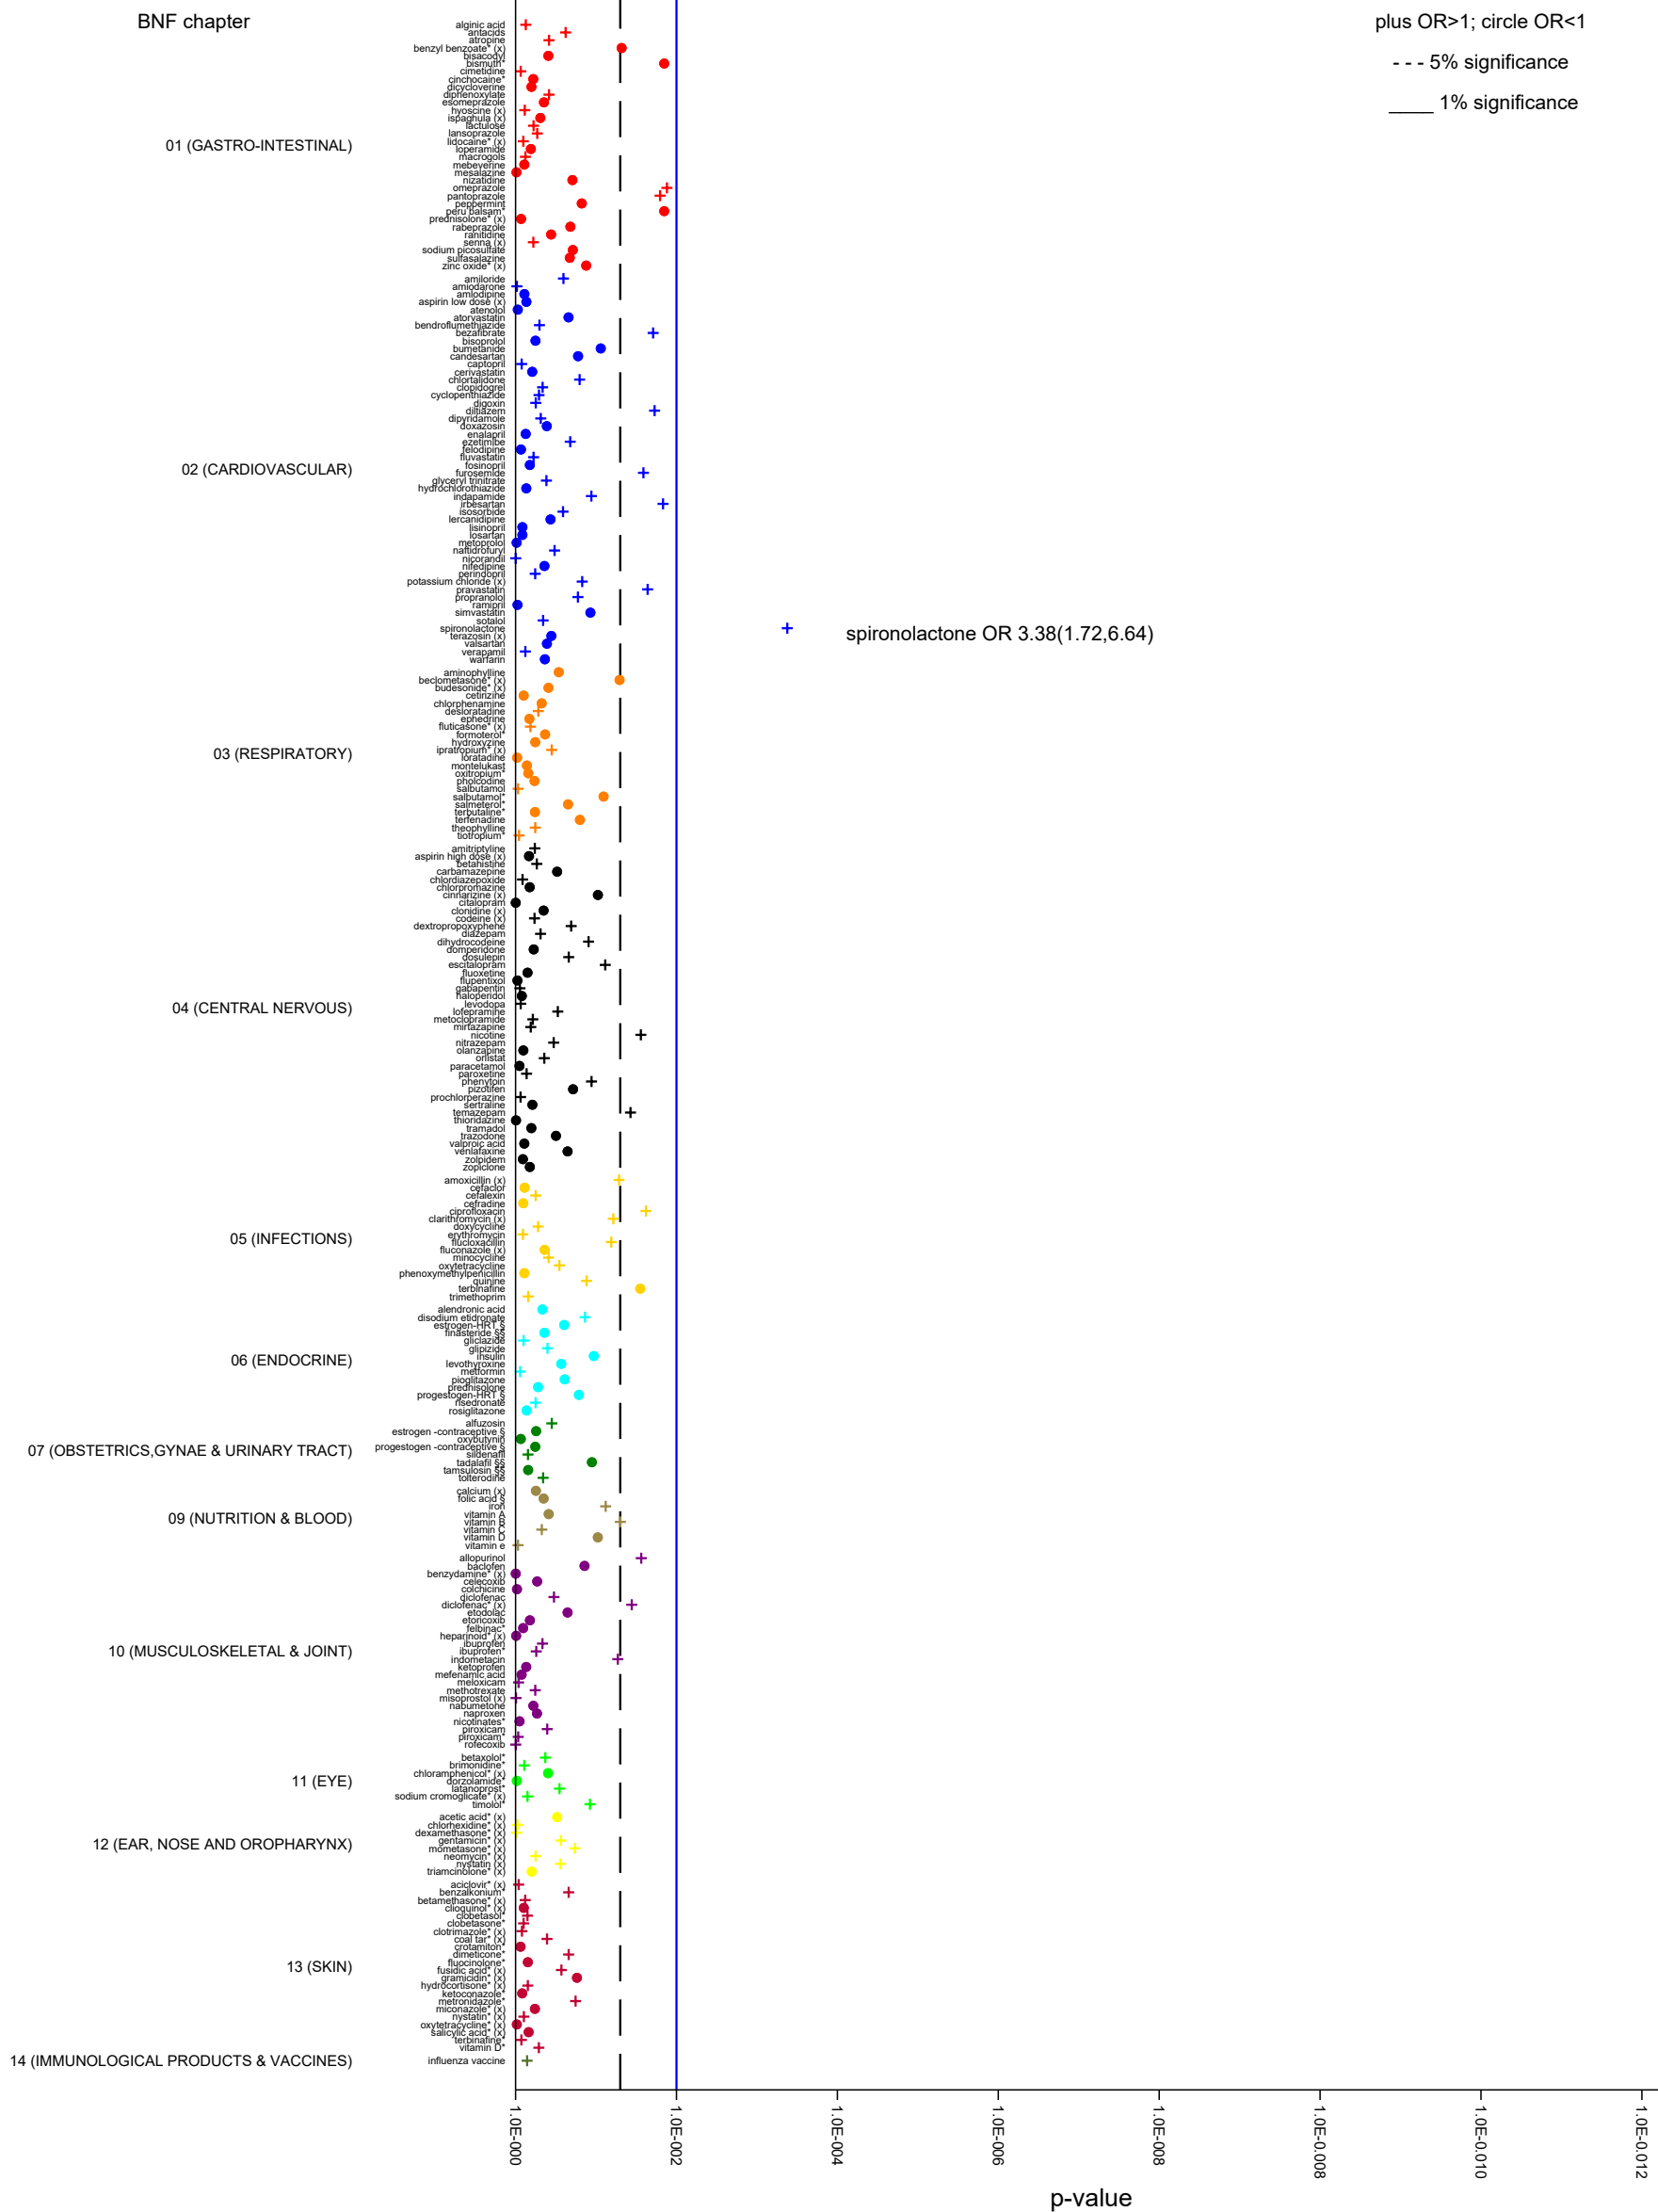

MWAS plot: thyroid cancer  
Comorbidity adjusted analysis (exposure any prescription)

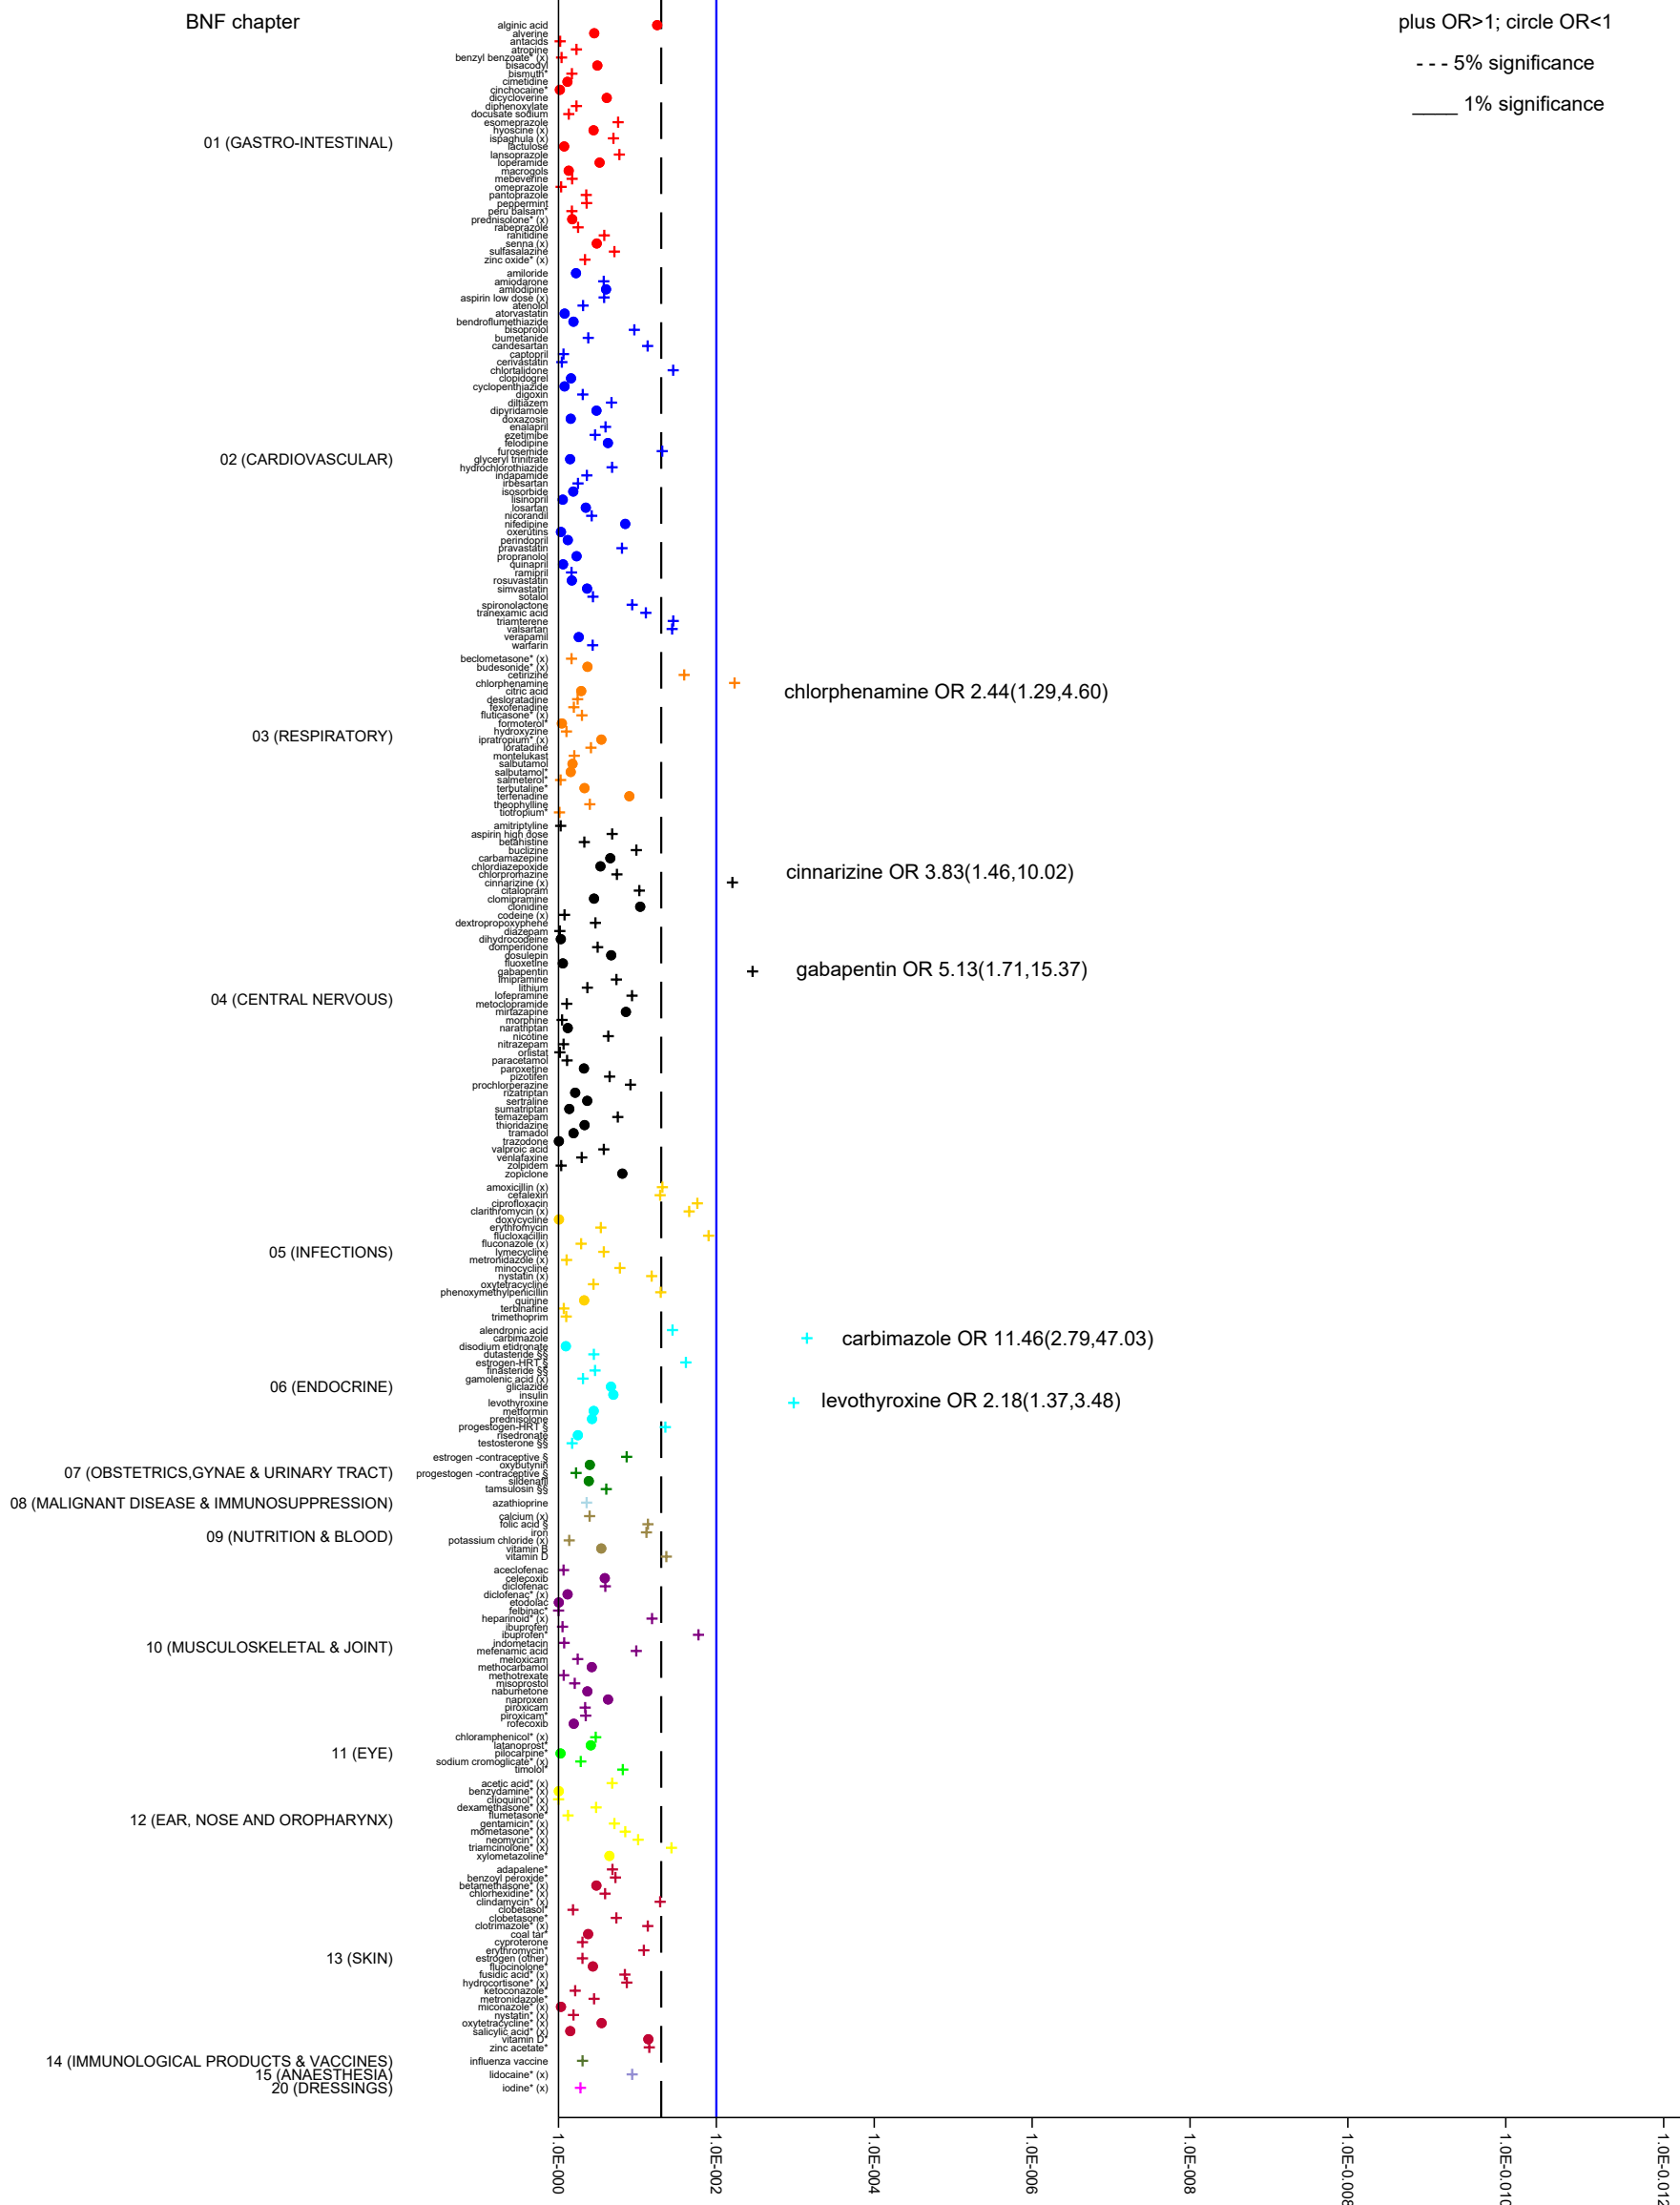

\* : local medicine; § females only; §§ males only; (x) most prevalent chapter

Comorbidity adjusted analysis (exposure any prescription)

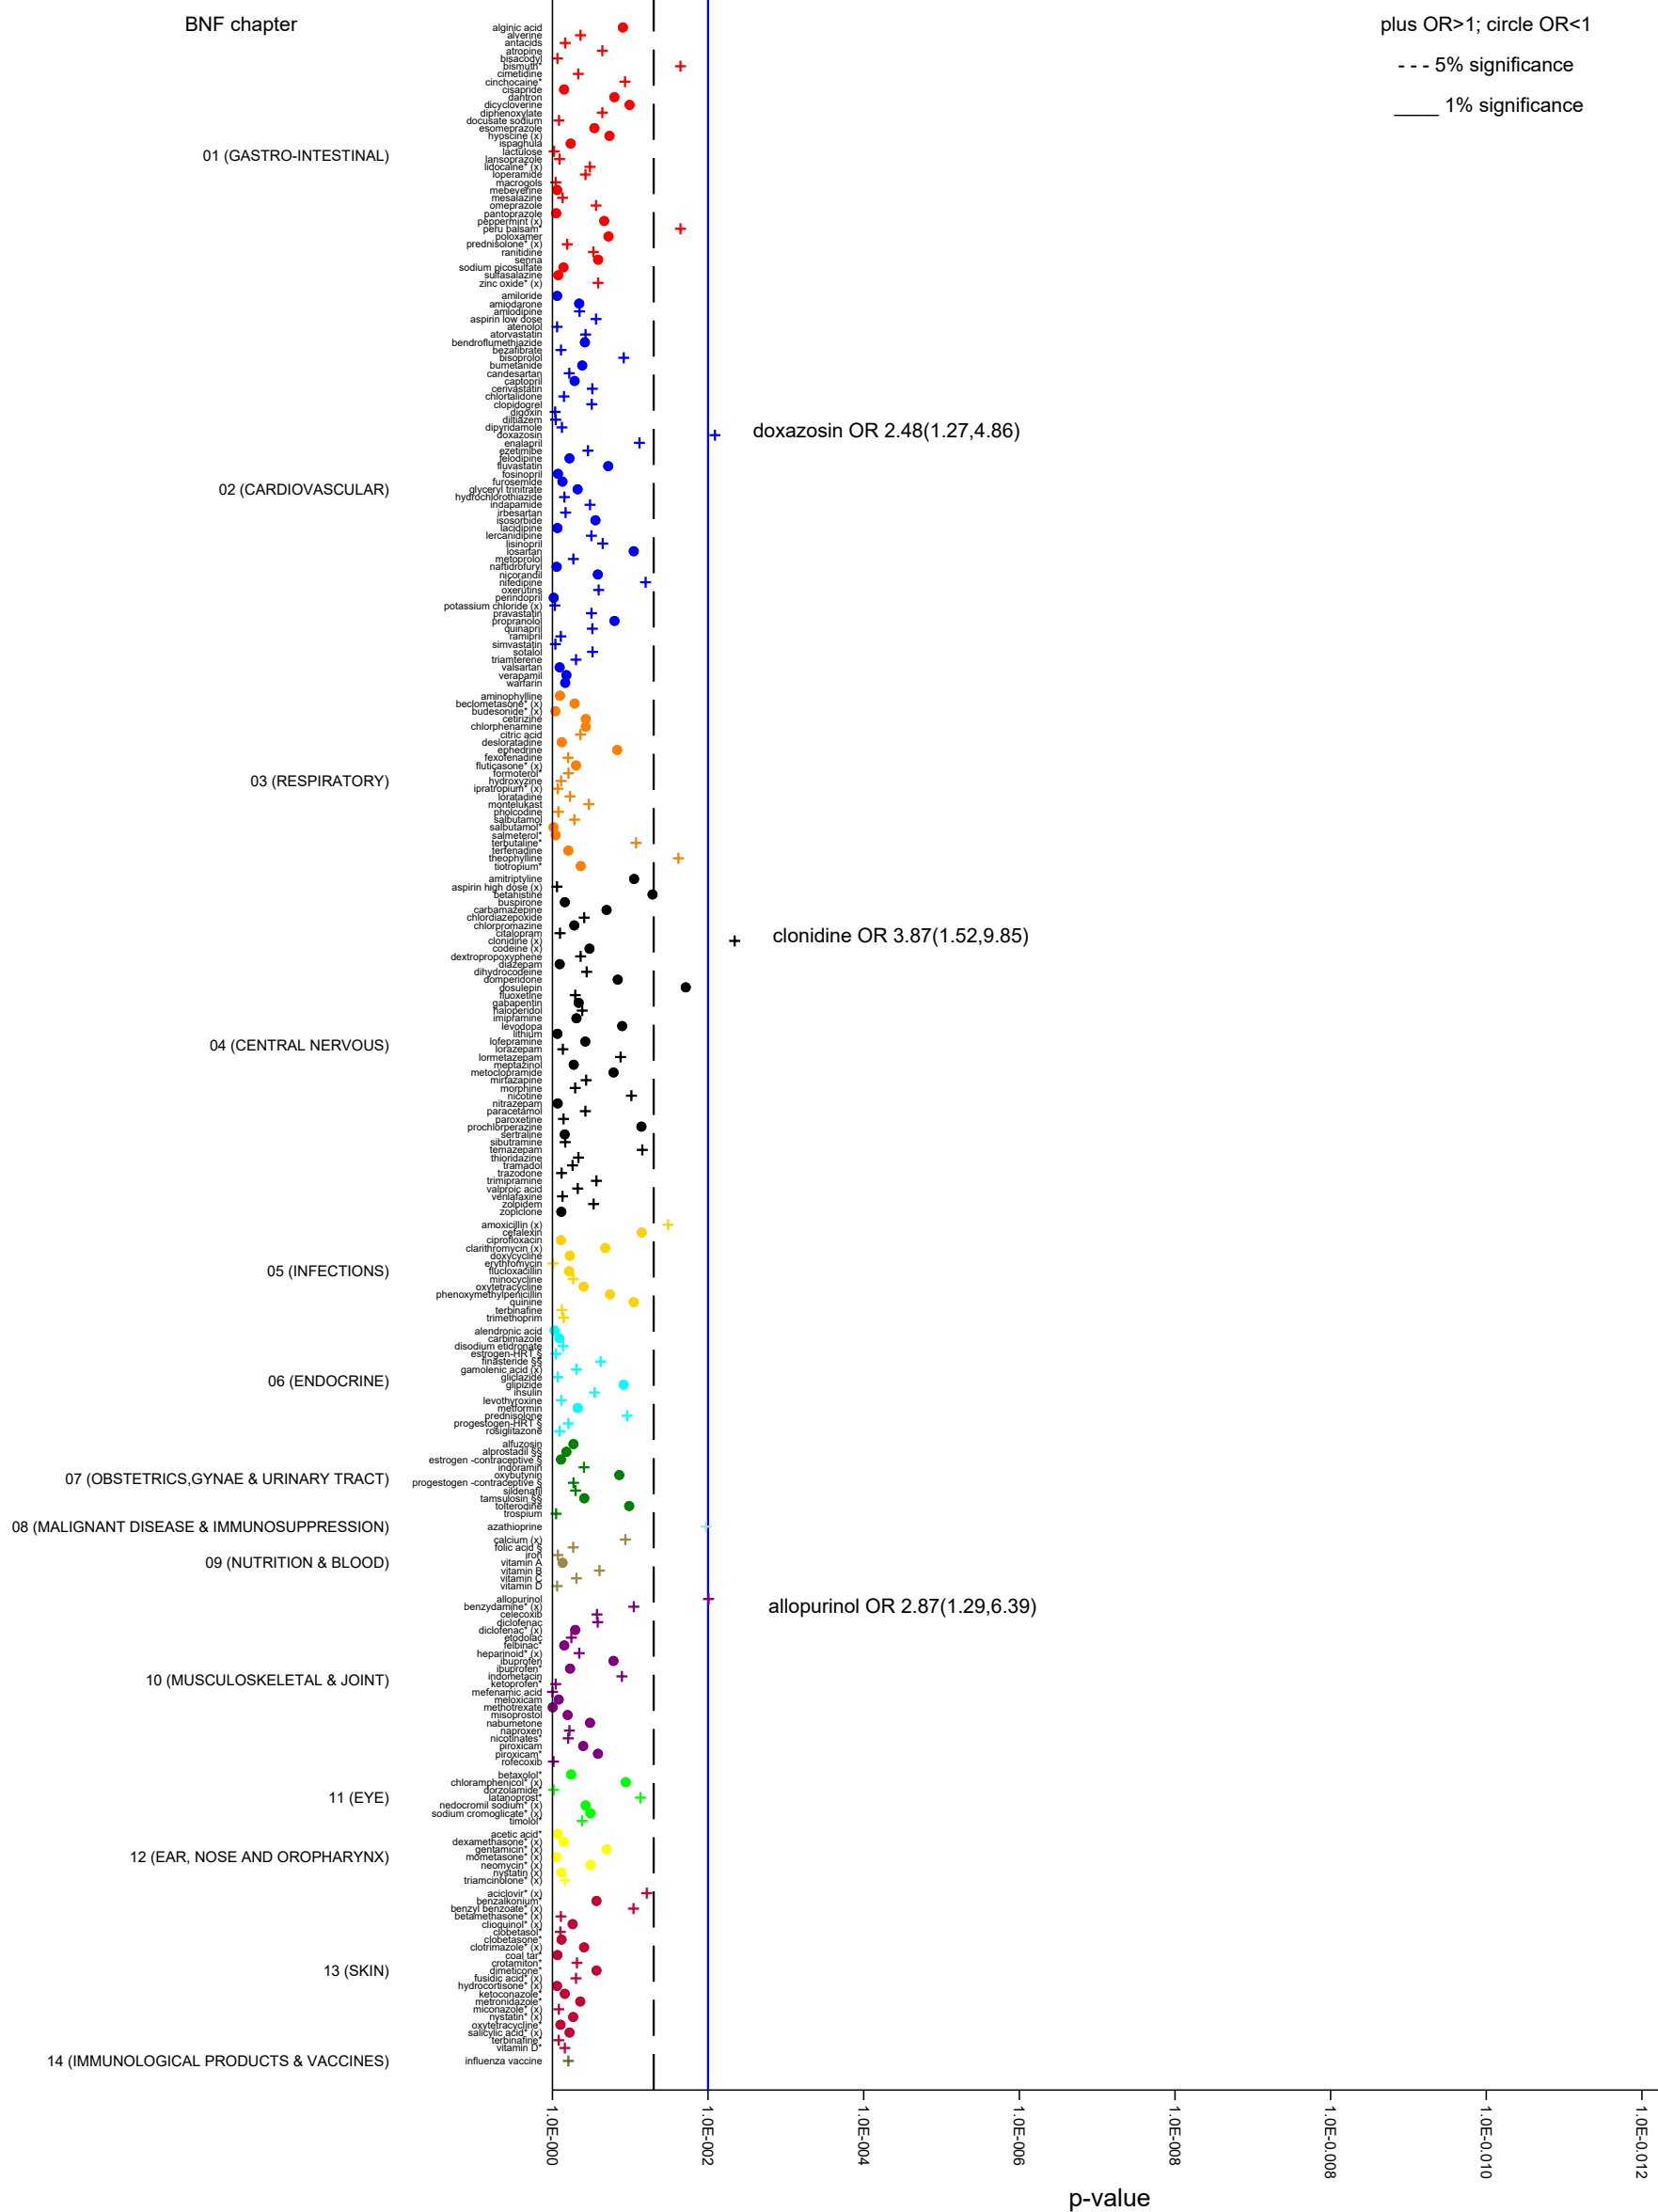



Fig S2: MWAS plots for comorbidity & smoking adjusted analyses: exposure any prescription

Comorbidity & smoking adjusted analysis (exposure any prescription)

BNF chapter

plus OR>1; circle OR<1

- - - 5% significance

\_\_\_\_\_ 1% significance

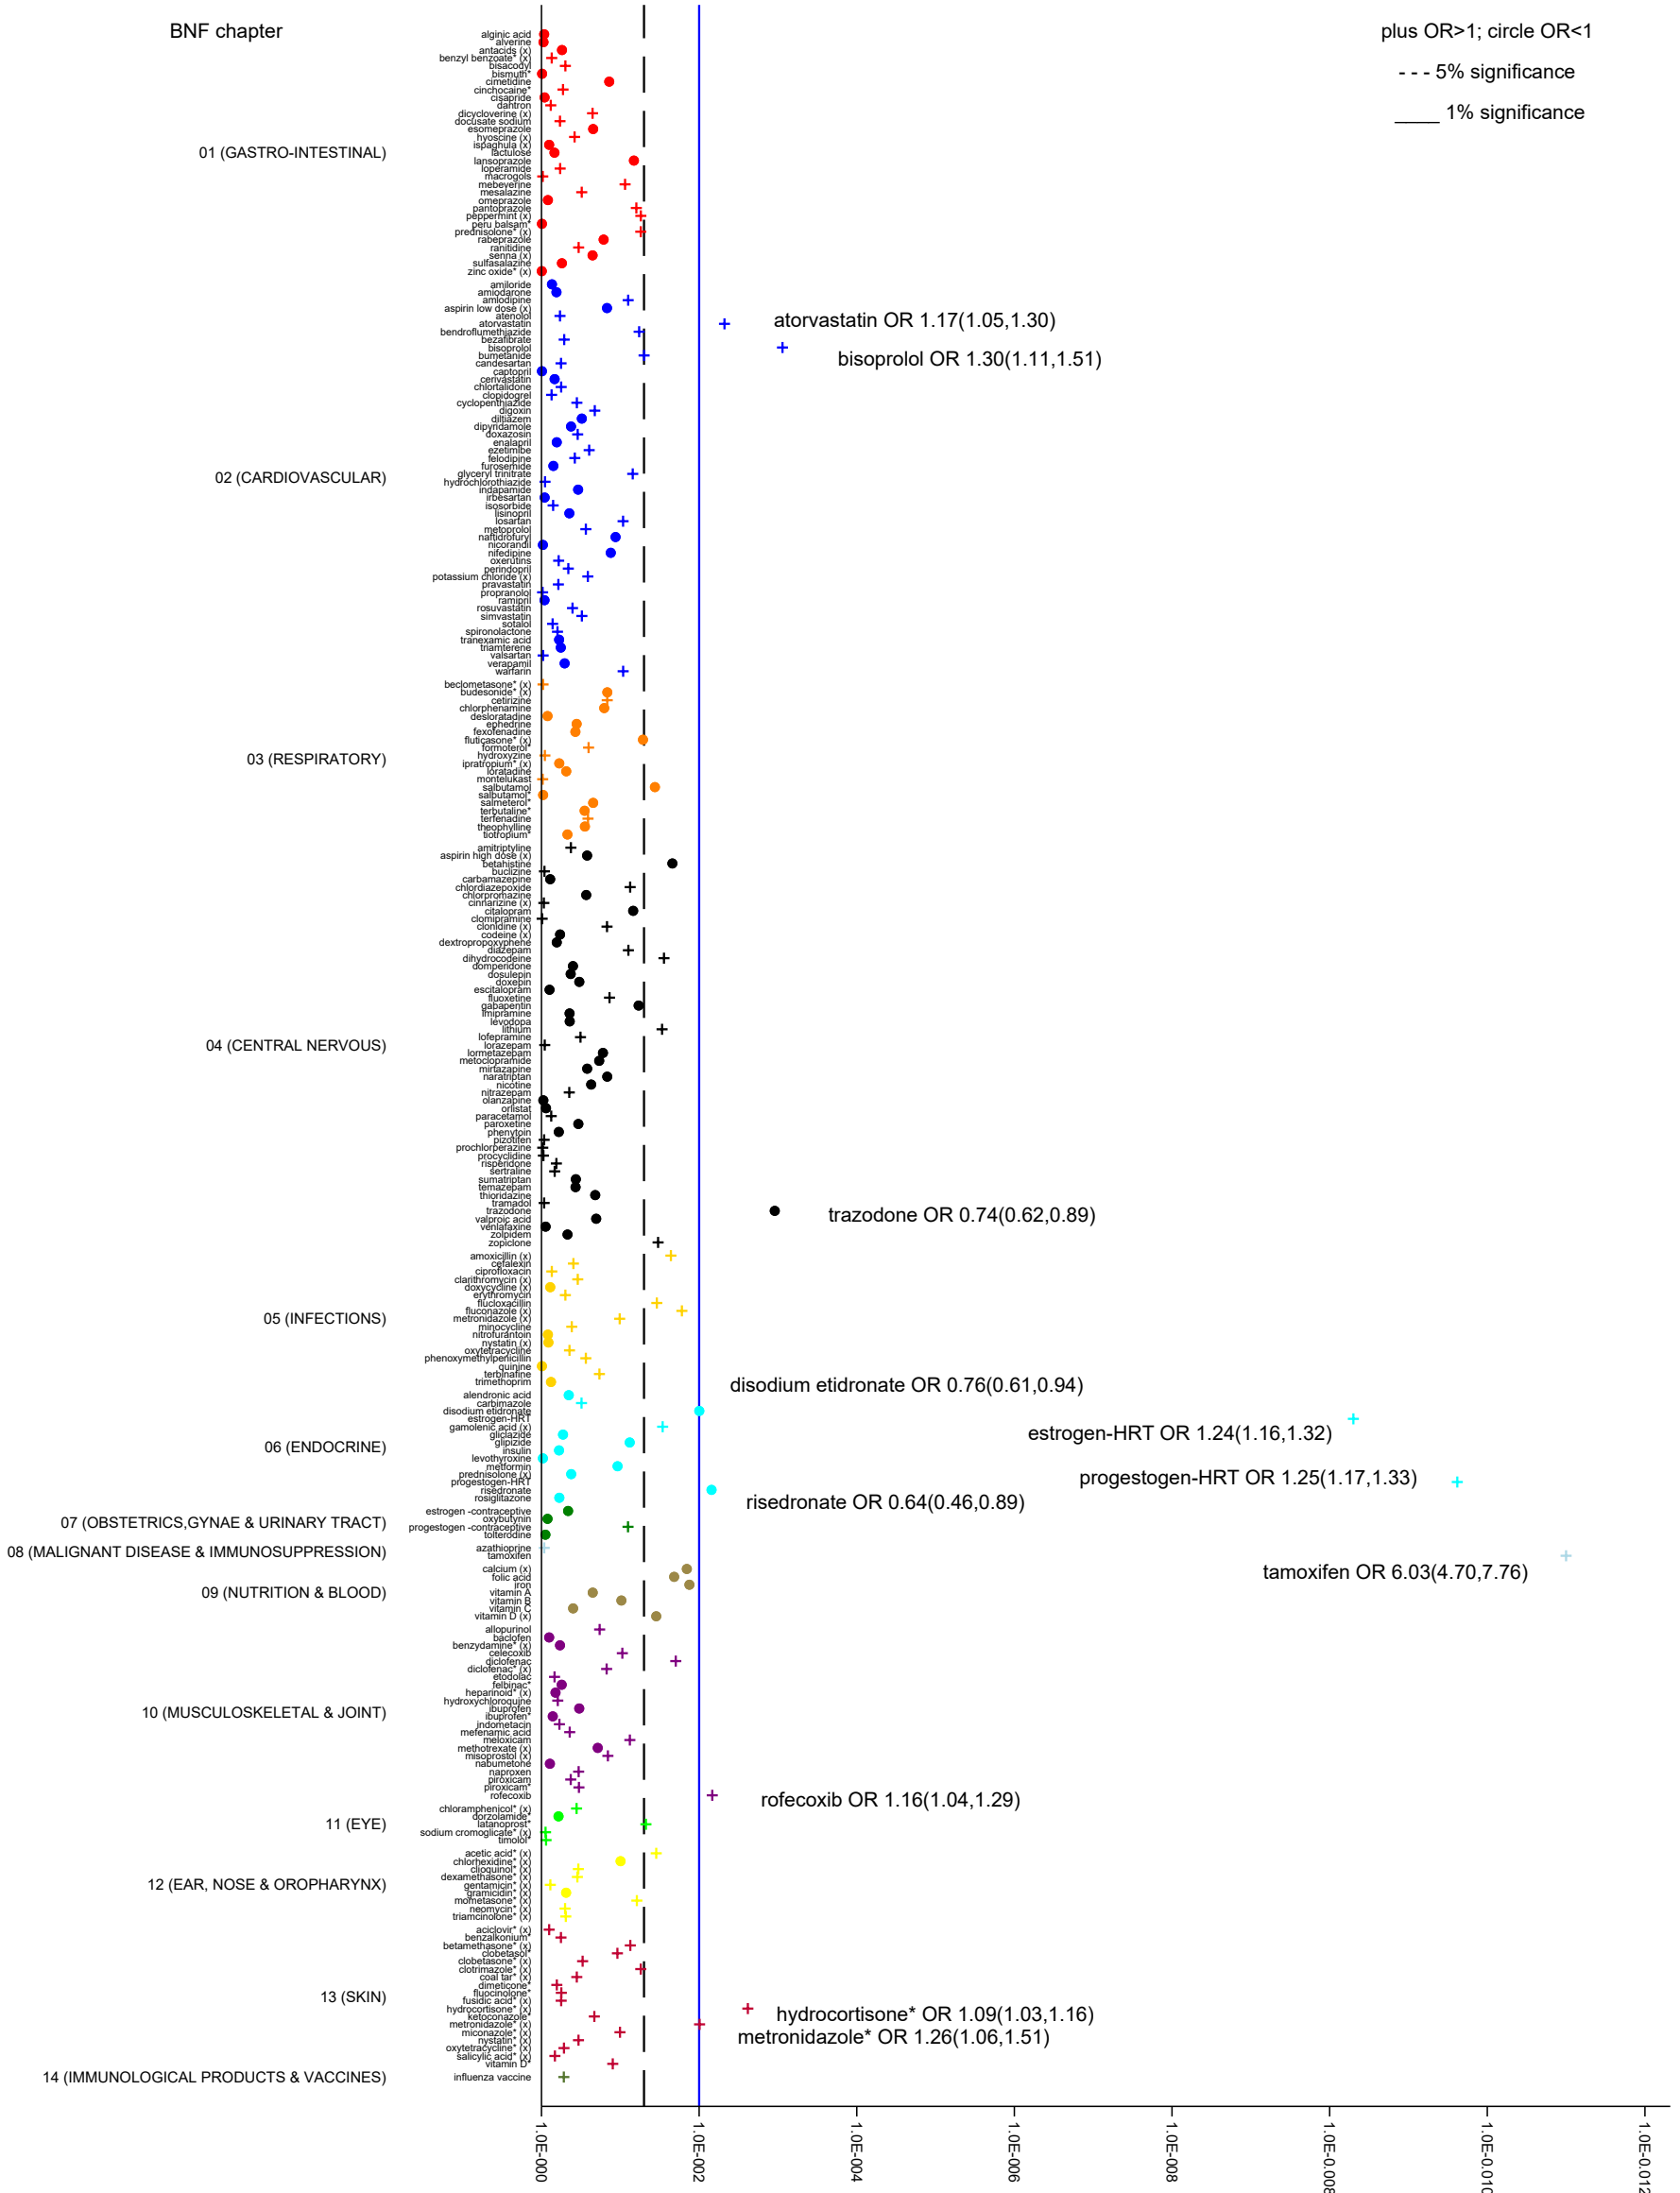

\* : local medicine; females only included in this analysis; (l): local; (x) most prevalent chapter

# MWAS plot: lung cancer

## Comorbidity & smoking adjusted analysis (exposure any prescription)

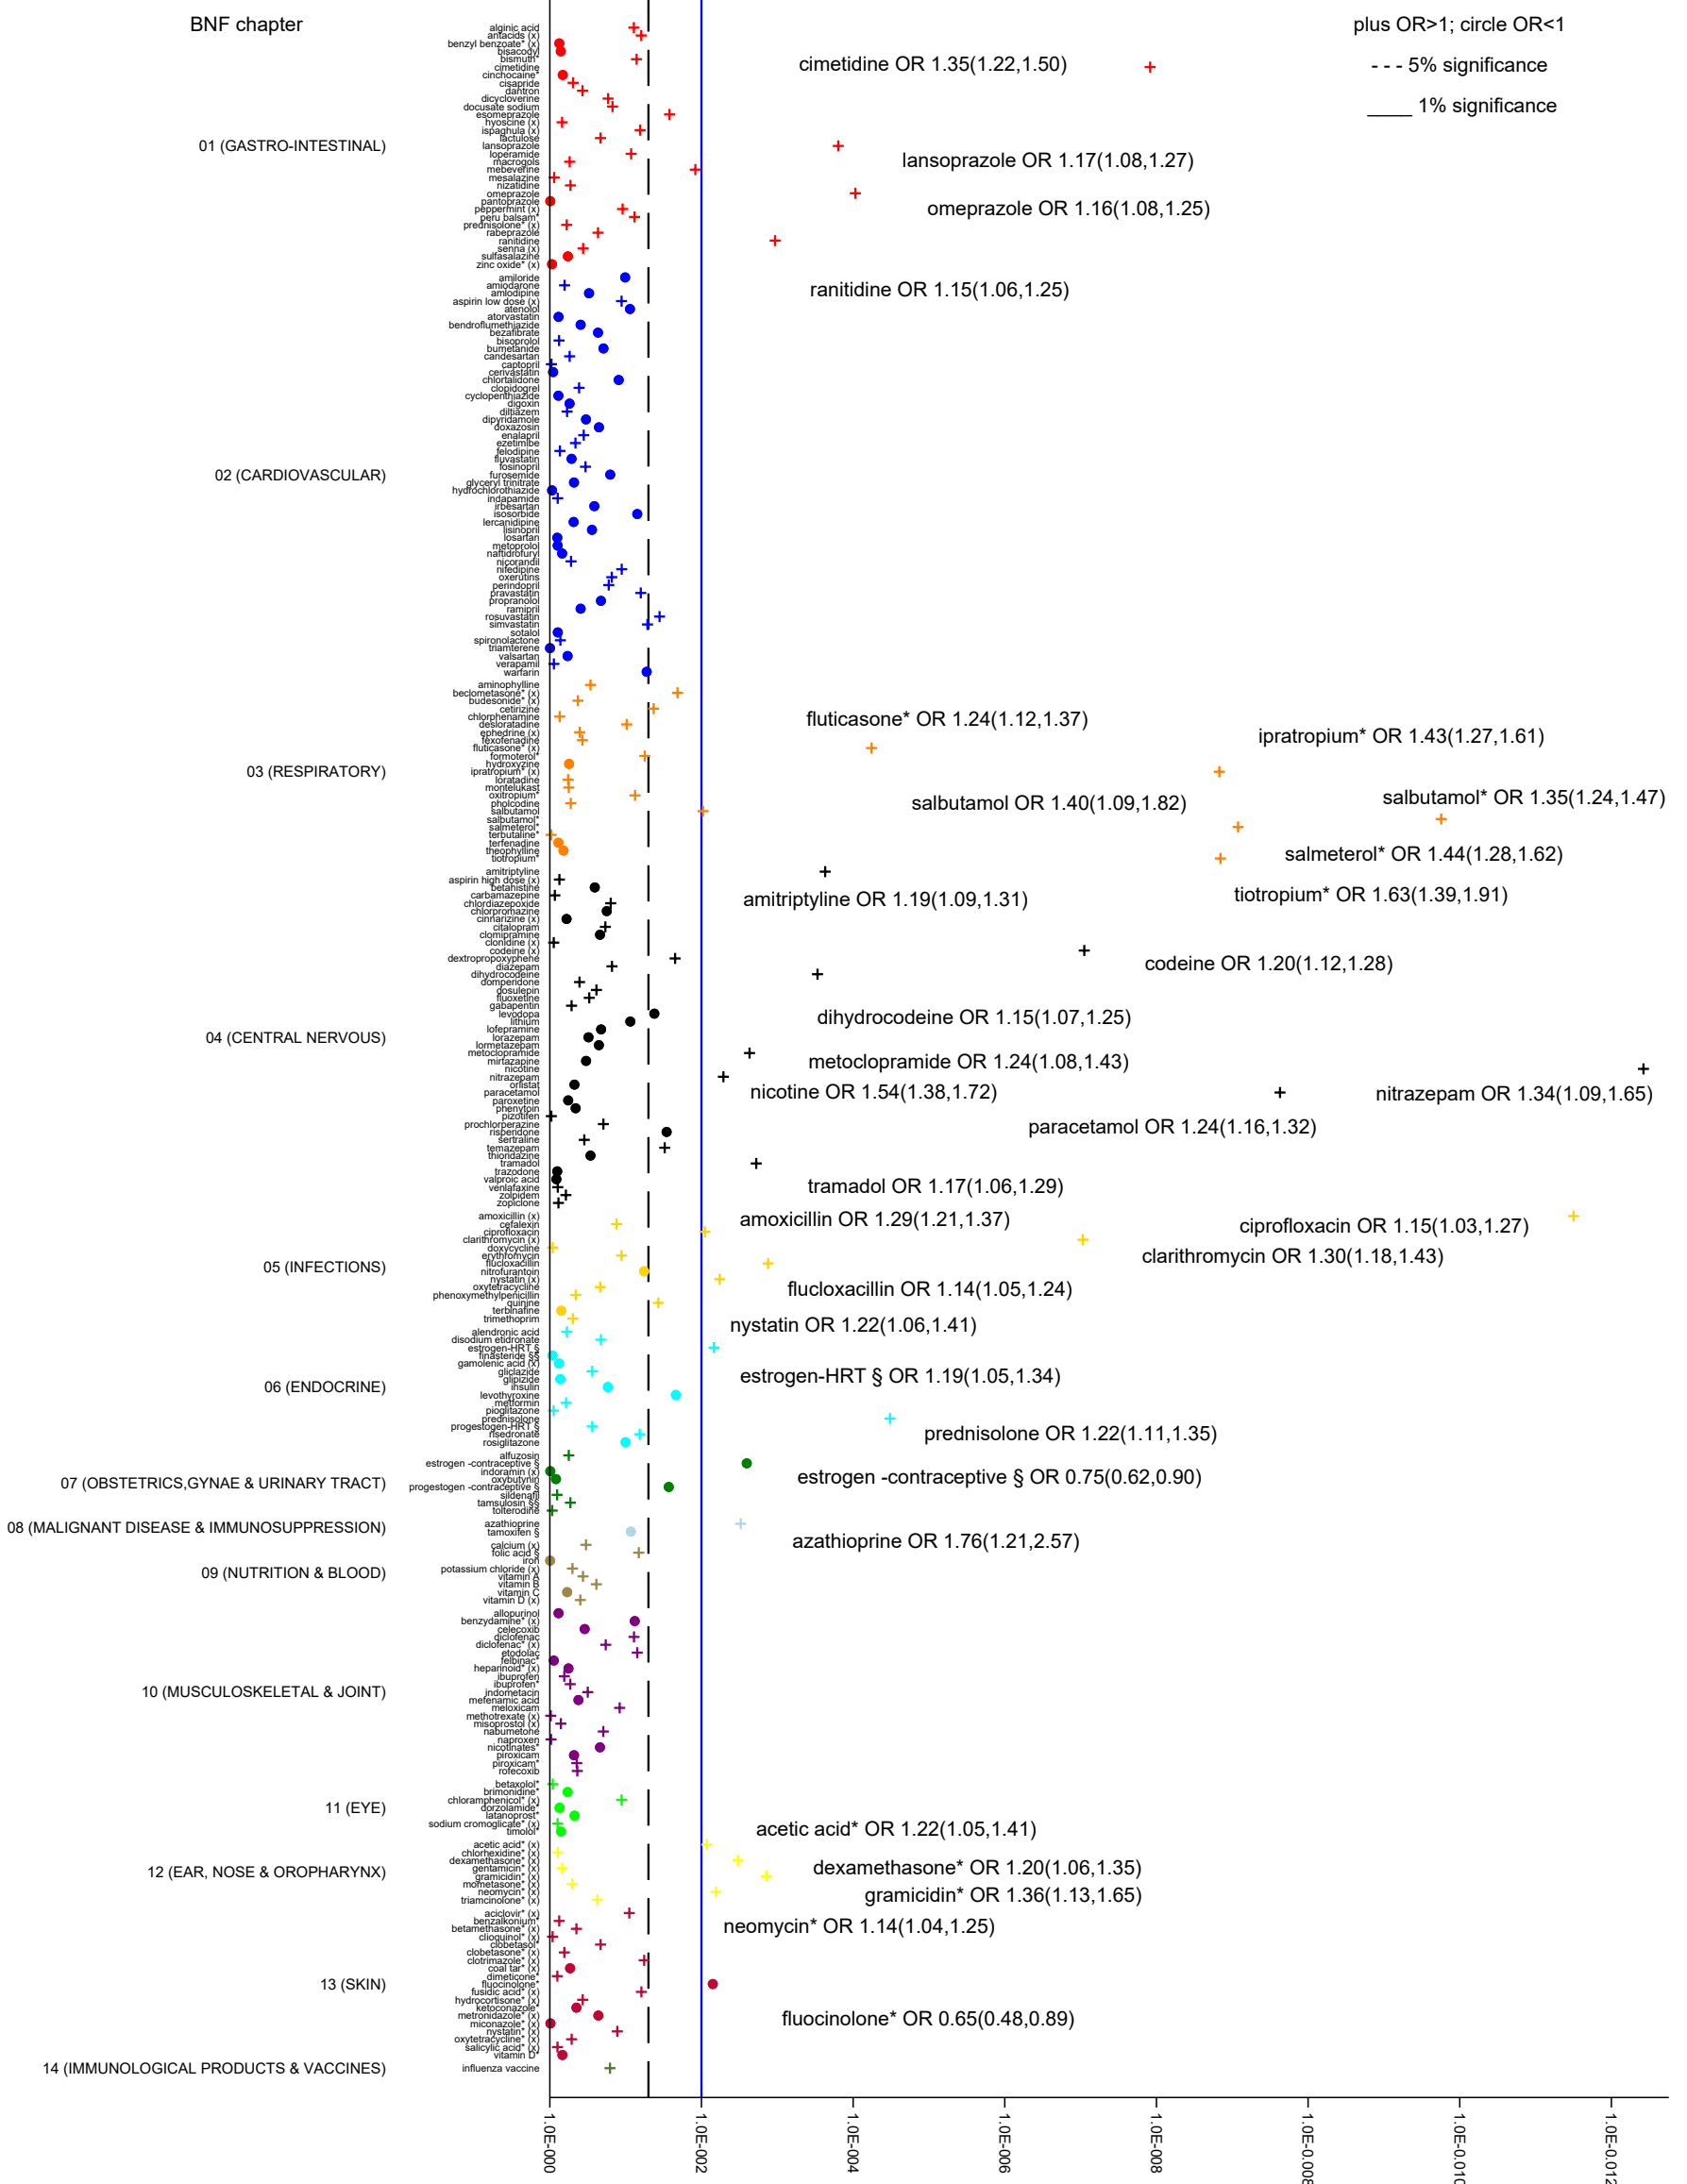

MWAS plot: colorectal cancer

Comorbidity & smoking adjusted analysis (exposure any prescription)

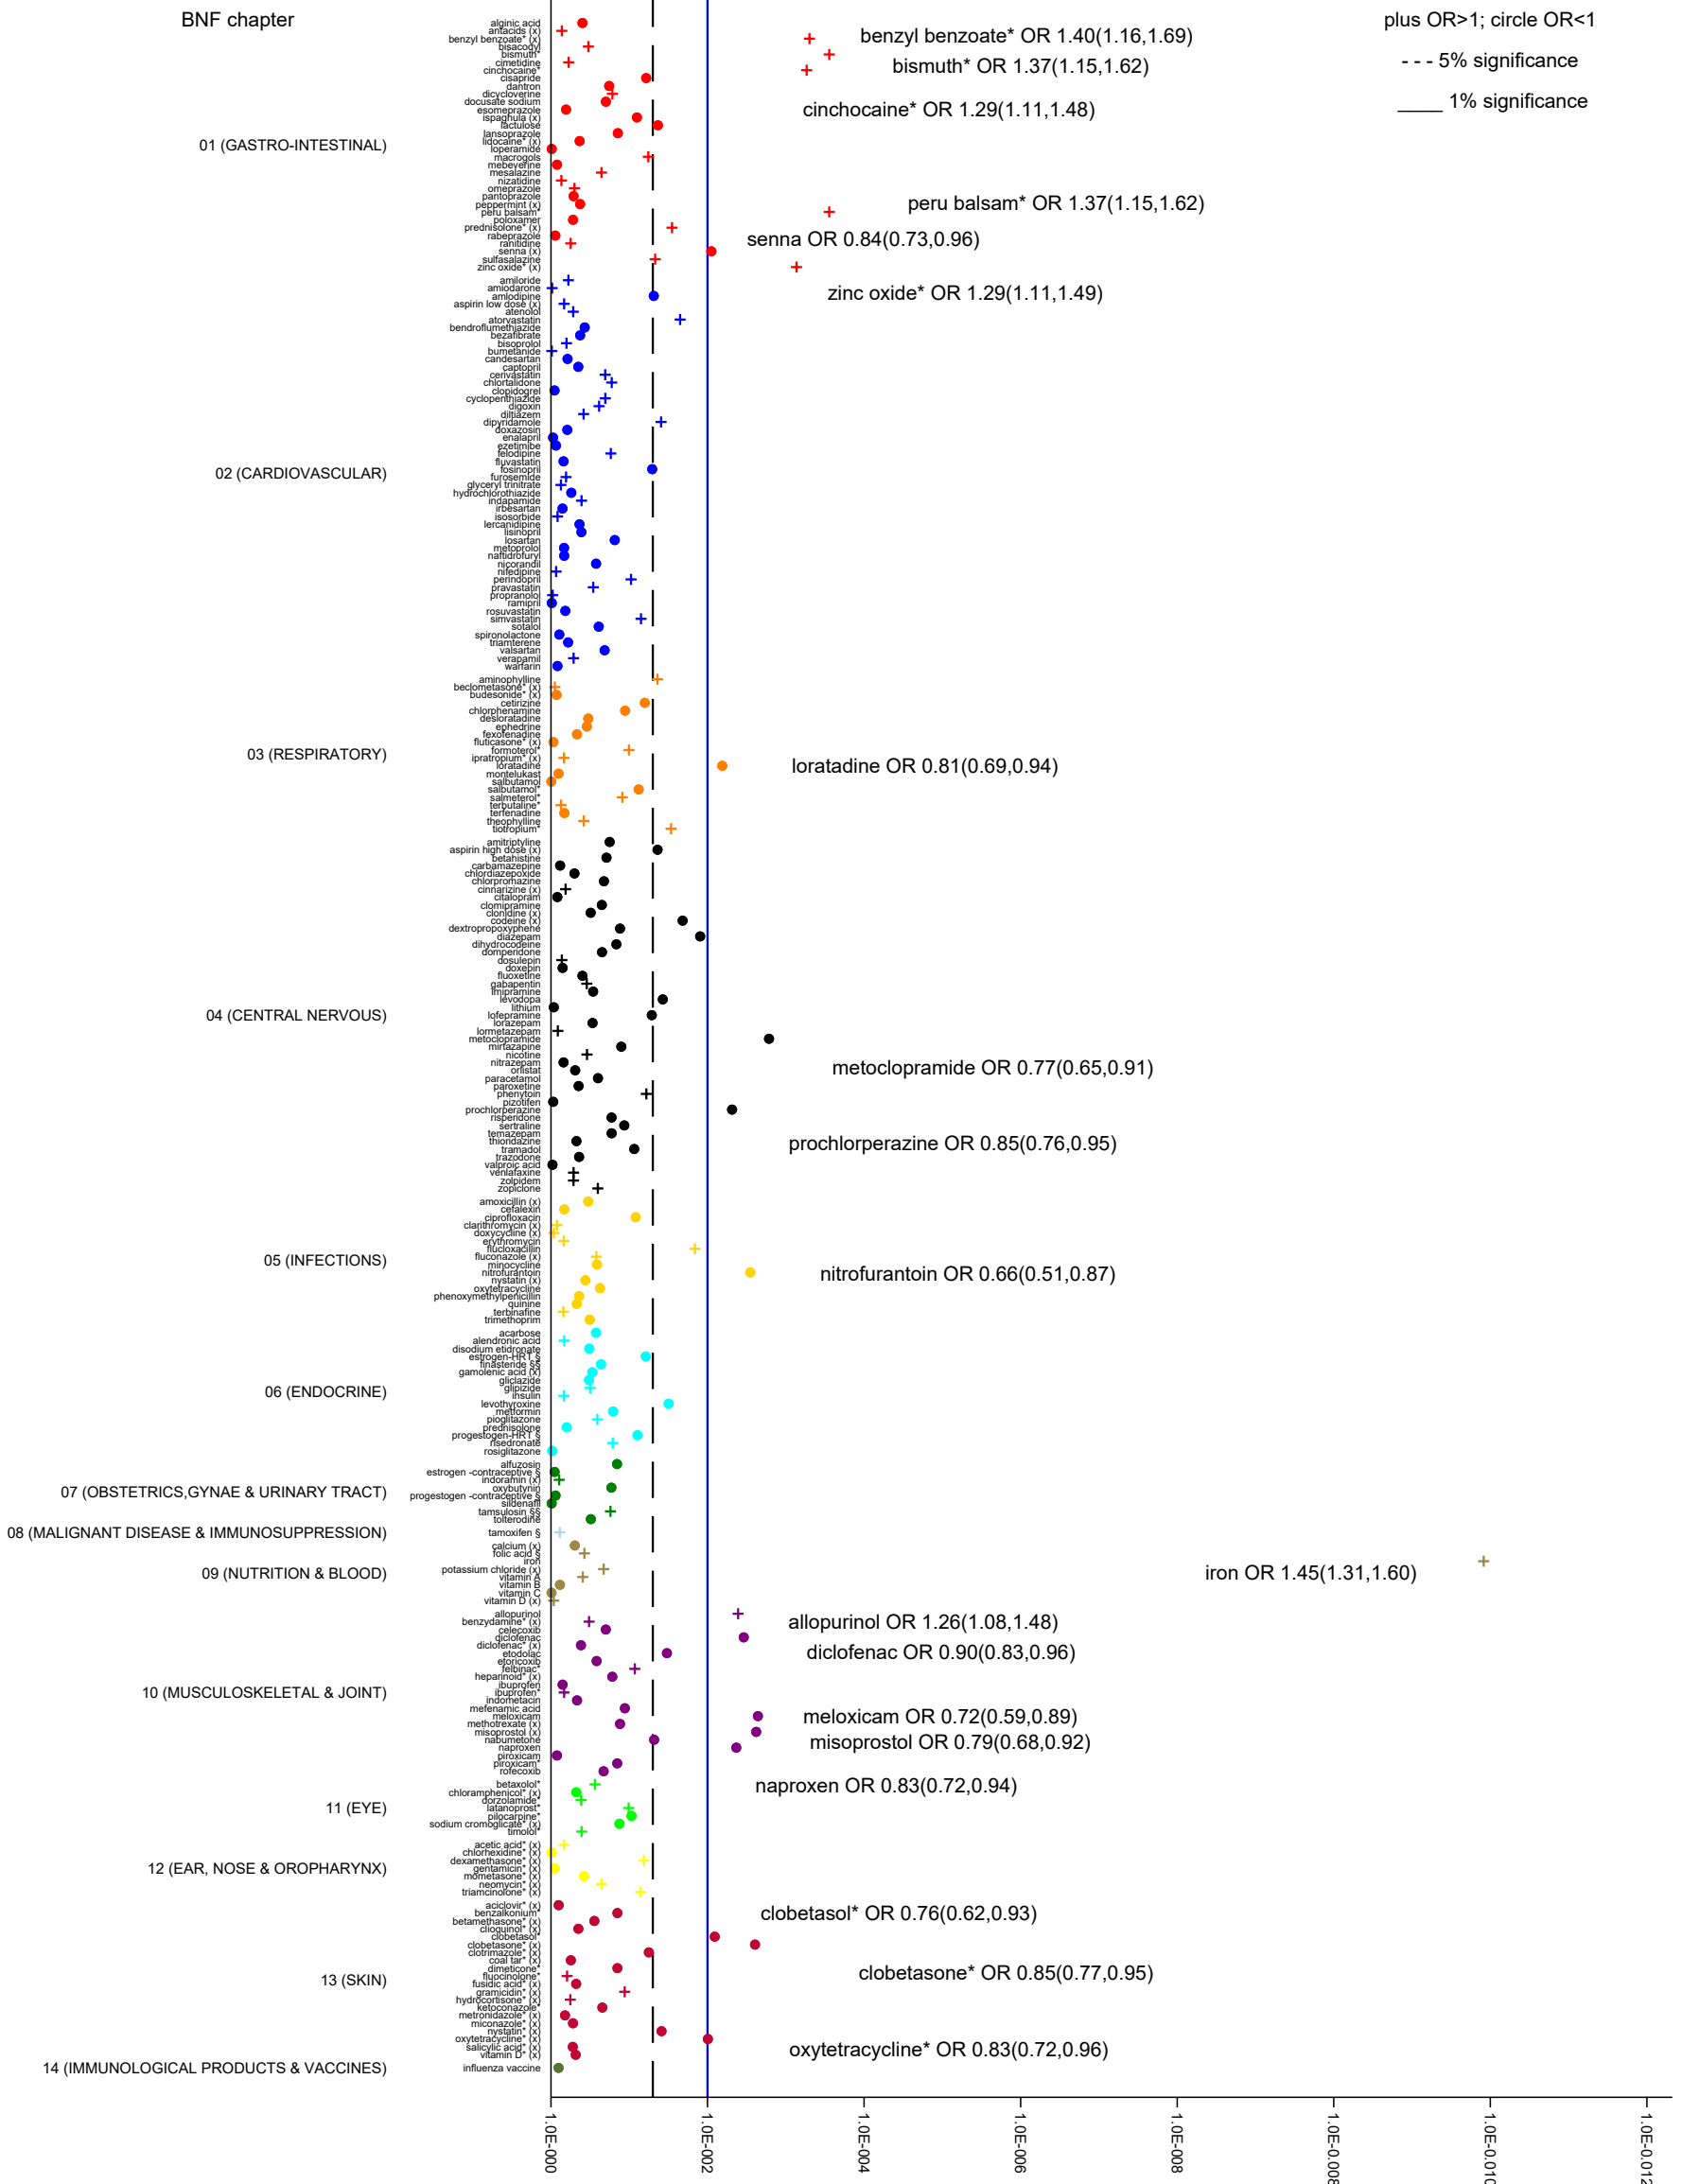

\* : local medicine; § females only; §§ males only; (x) most prevalent chapter

BNF chapter

plus OR>1; circle OR<1

--- 5% significance

— 1% significance

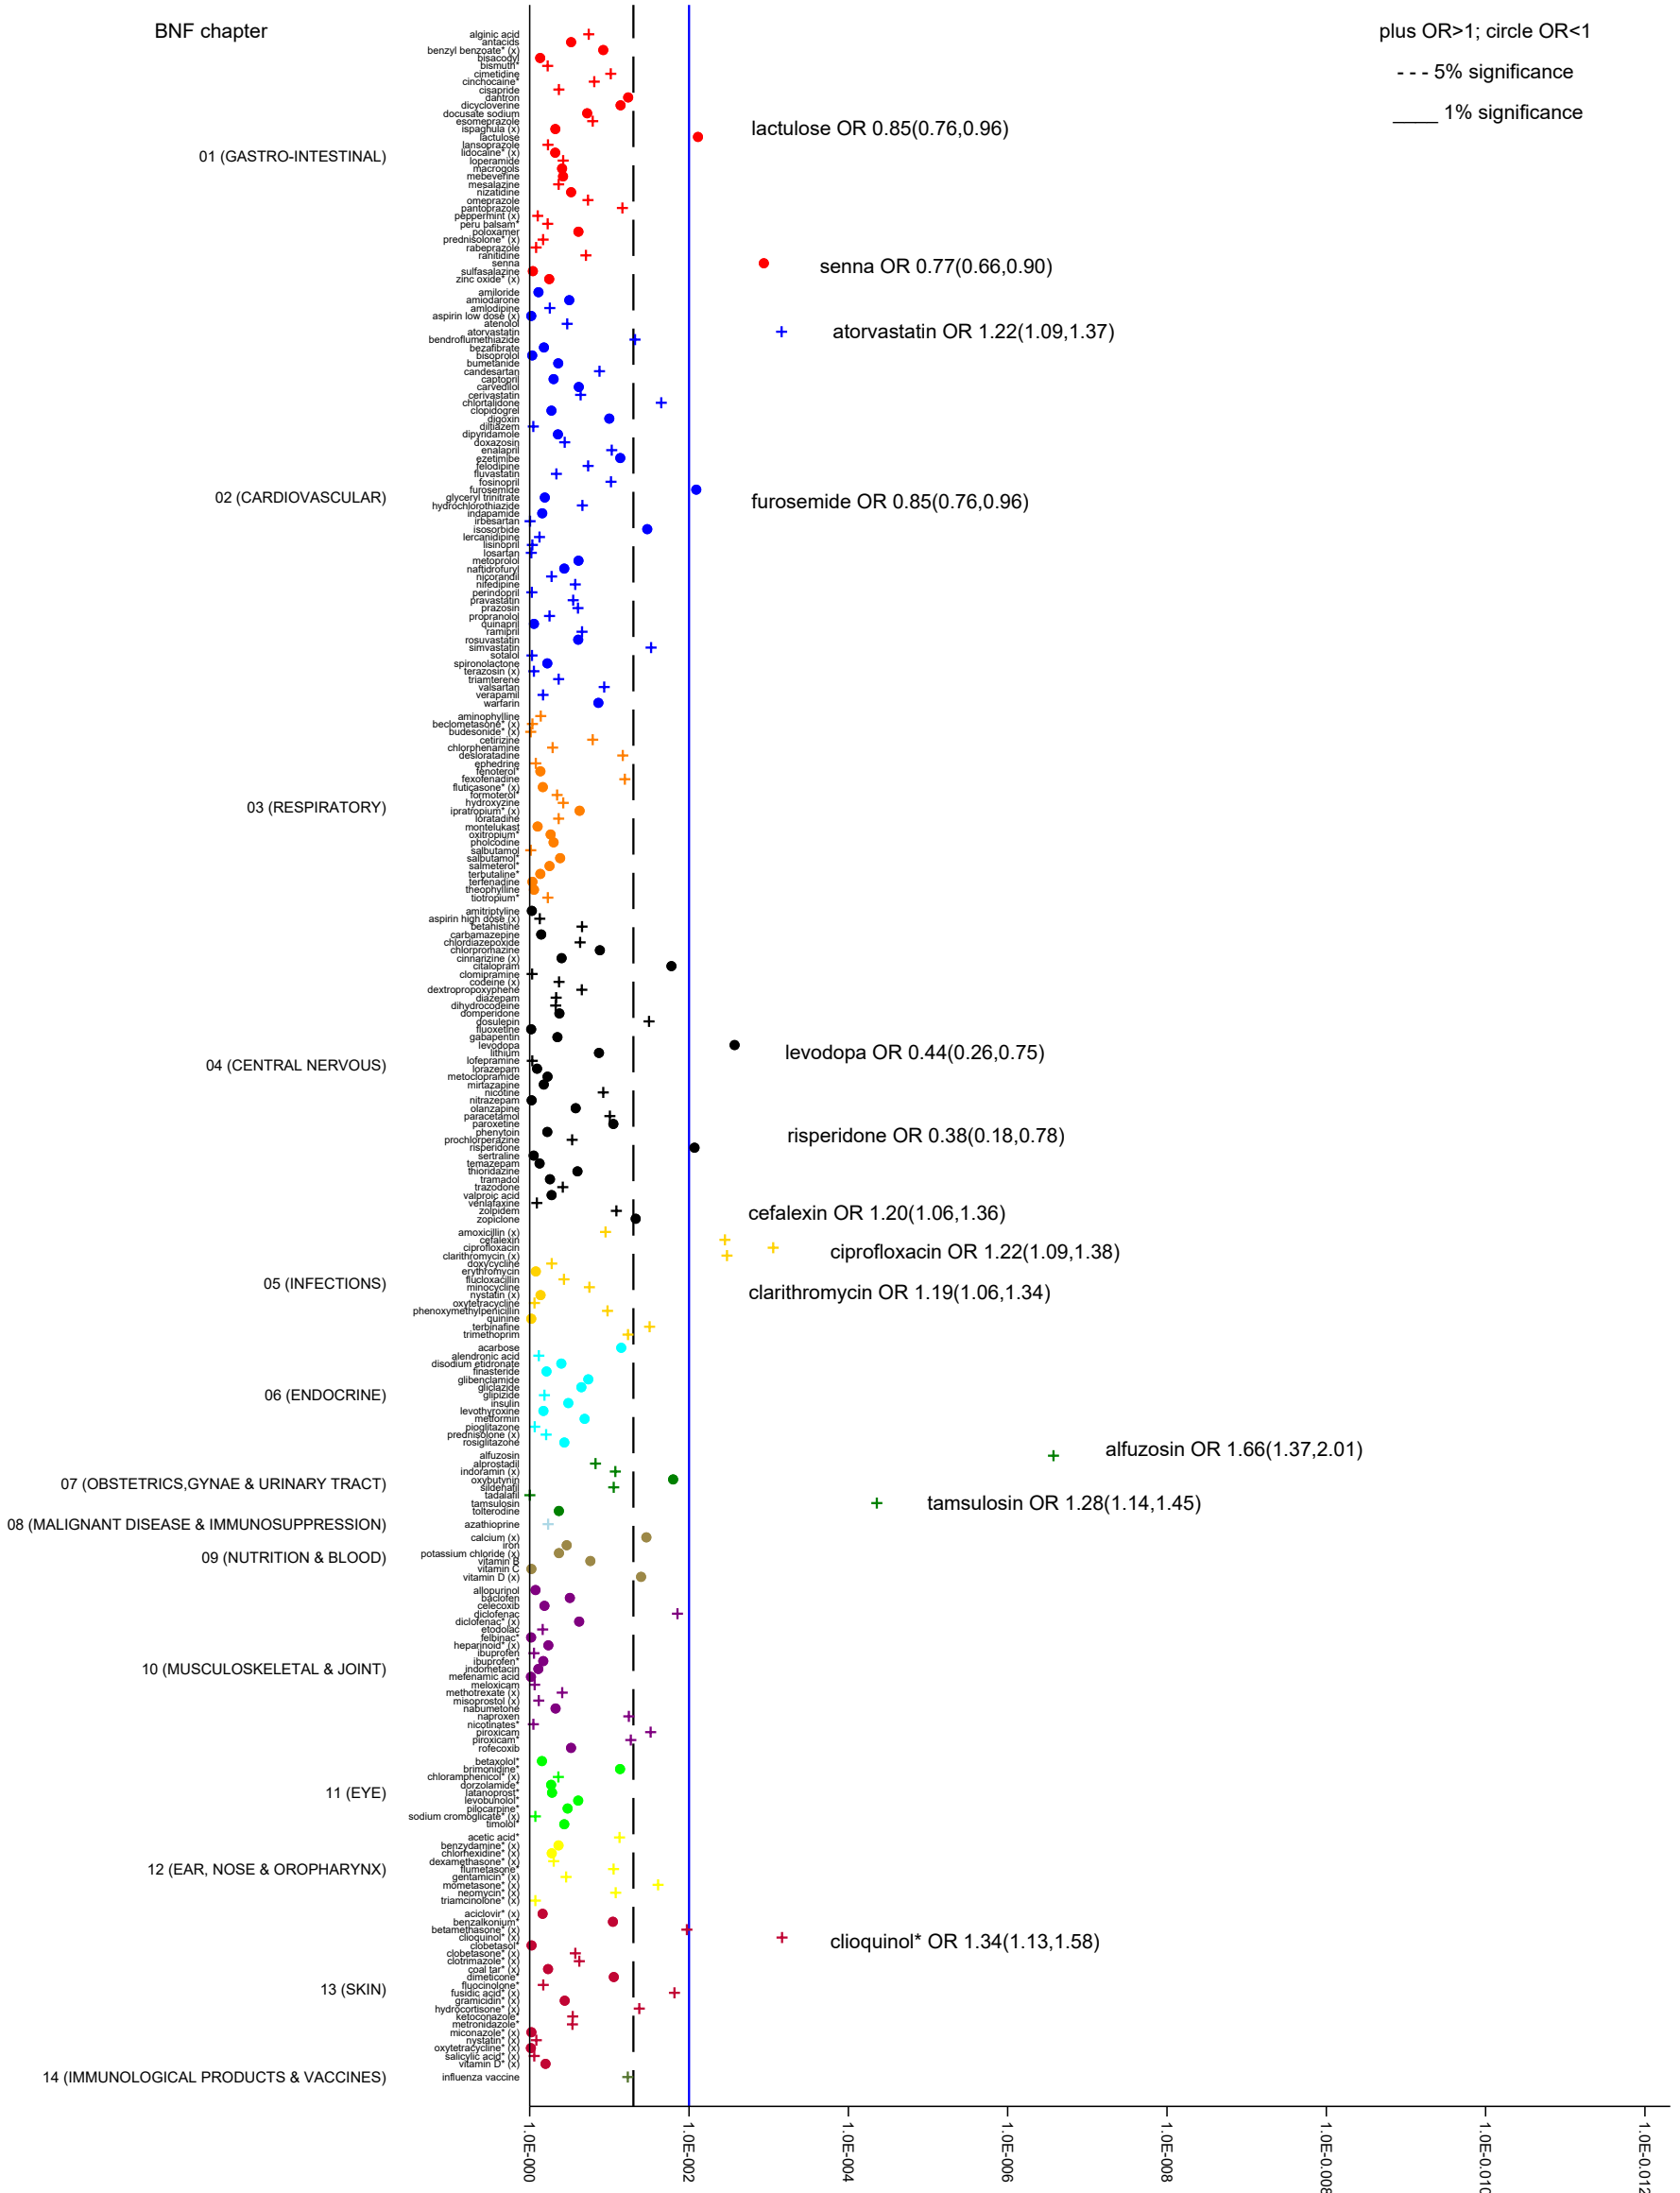

\* : local medicine; males only included in this analysis; (l): local; (x) most prevalent chapter

Comorbidity & smoking adjusted analysis (exposure any prescription)

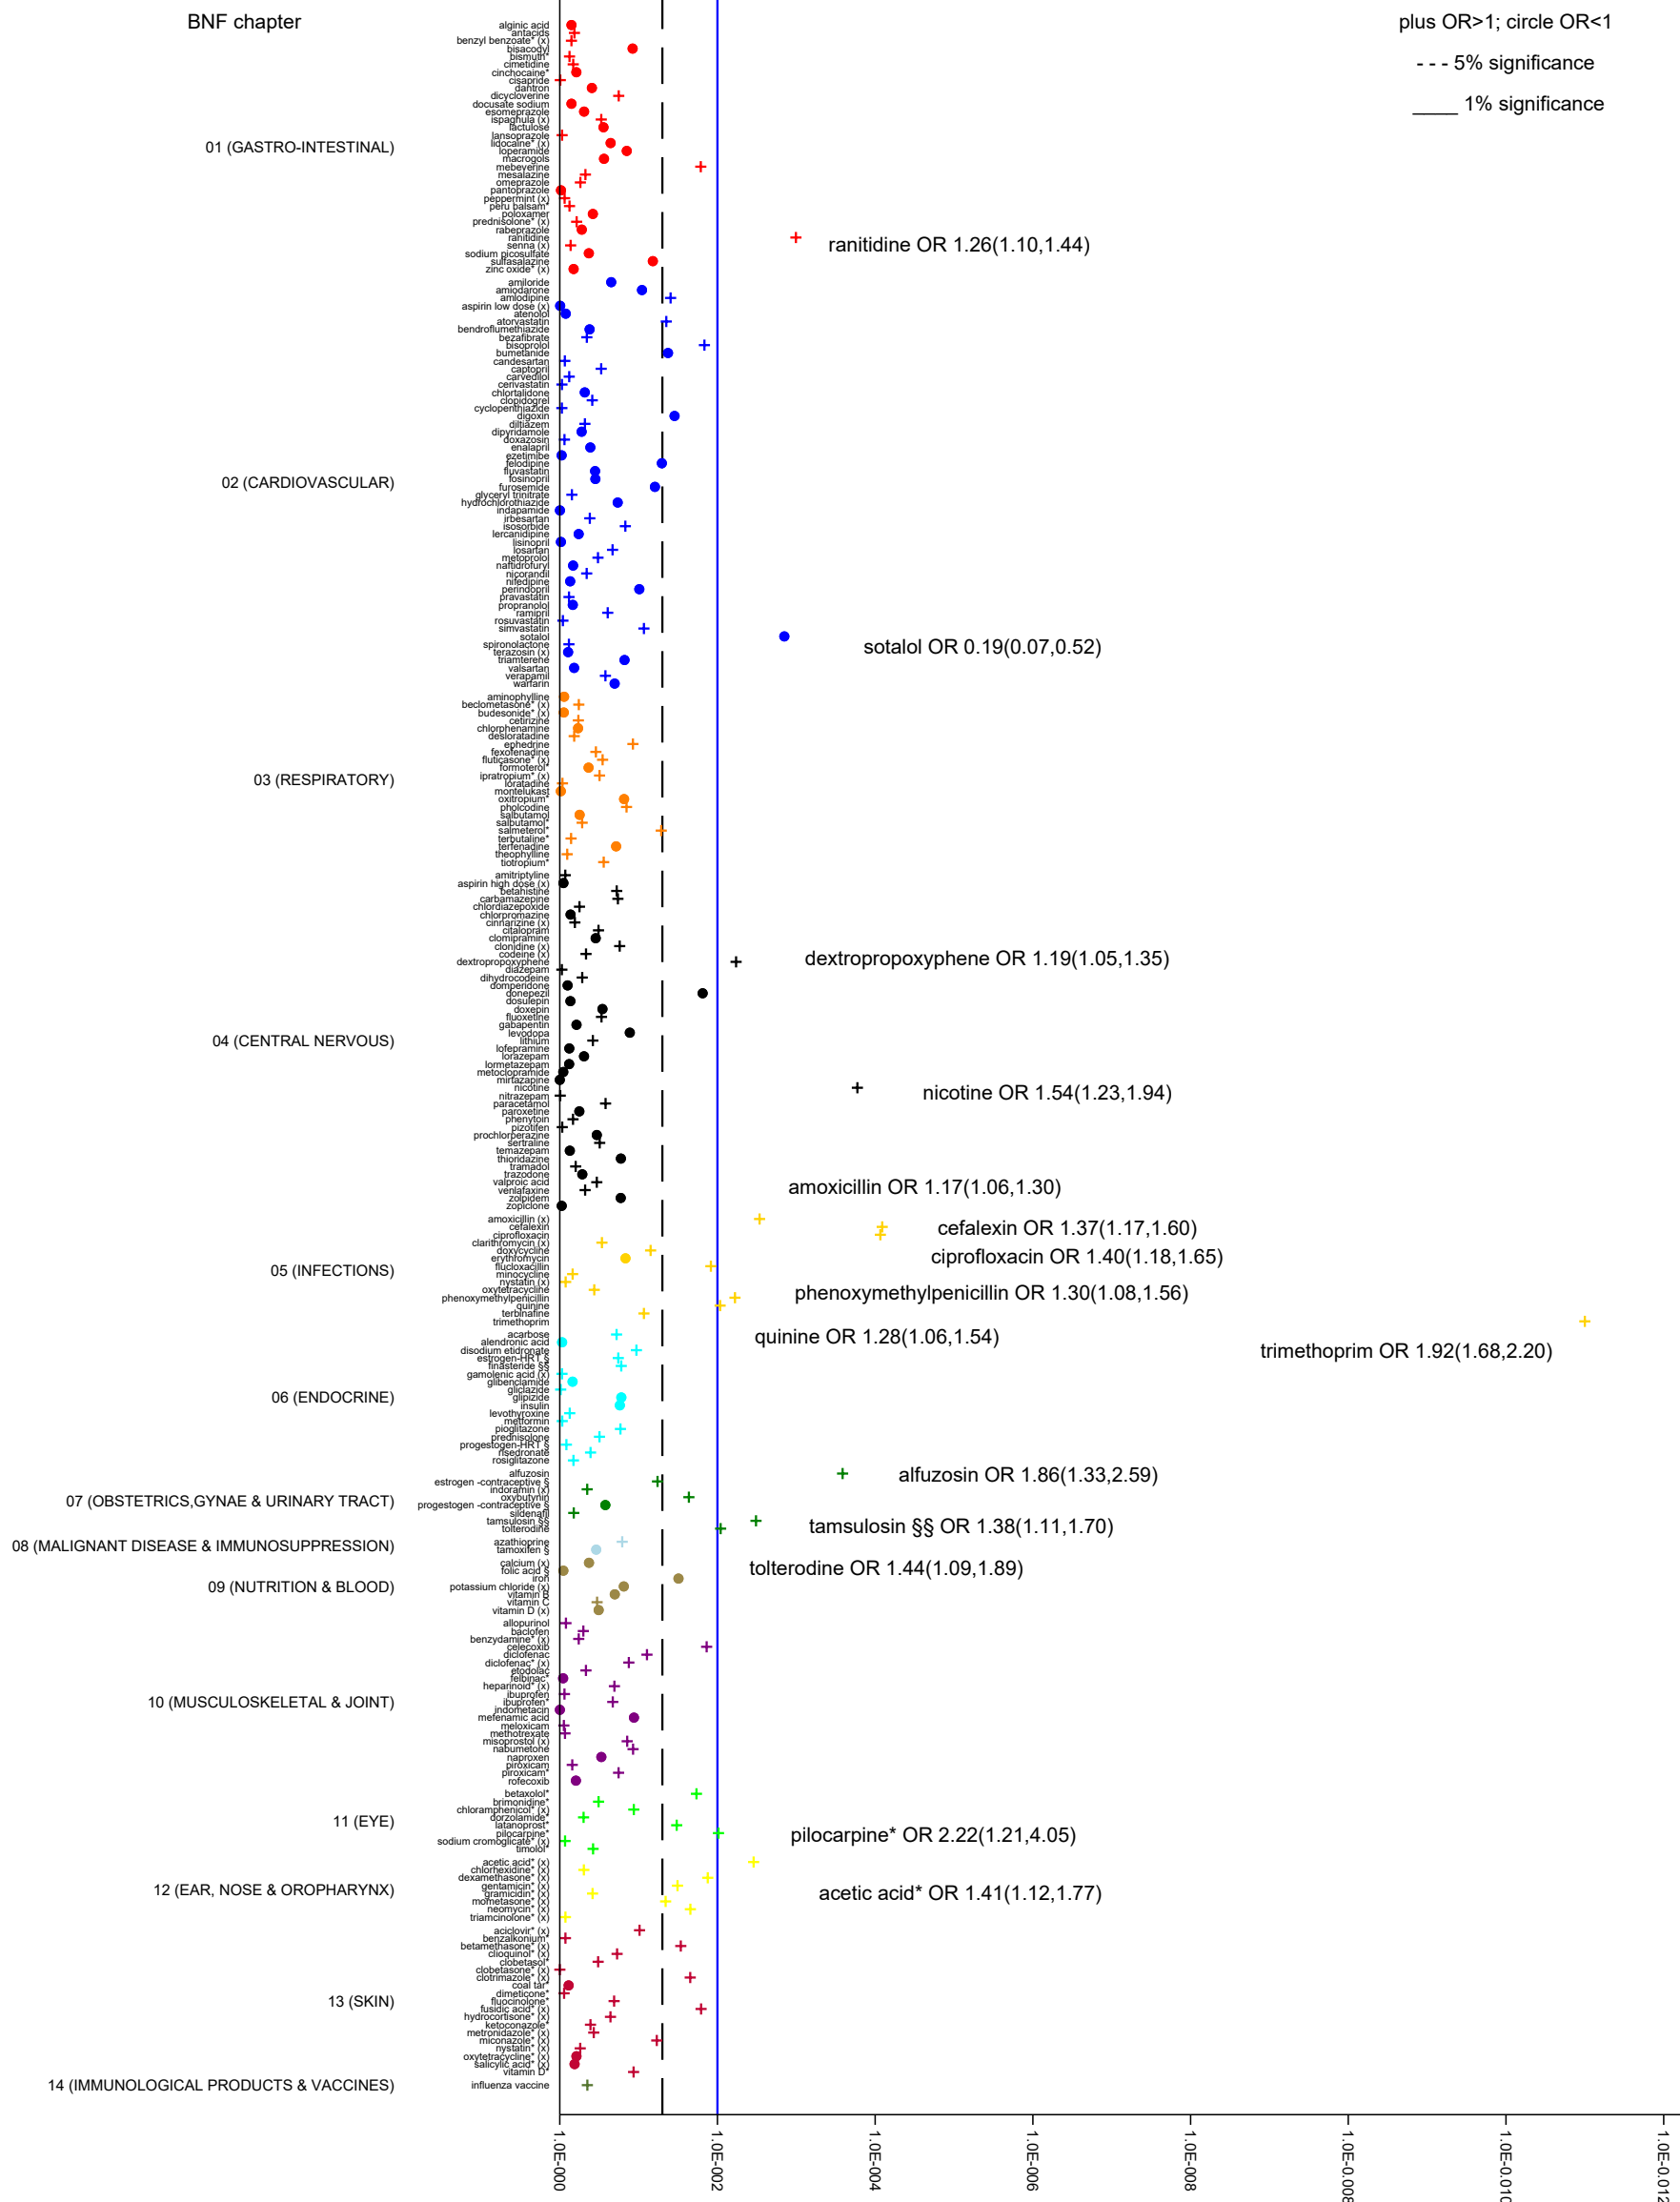

\* : local medicine; § females only; §§ males only; (x) most prevalent chapter

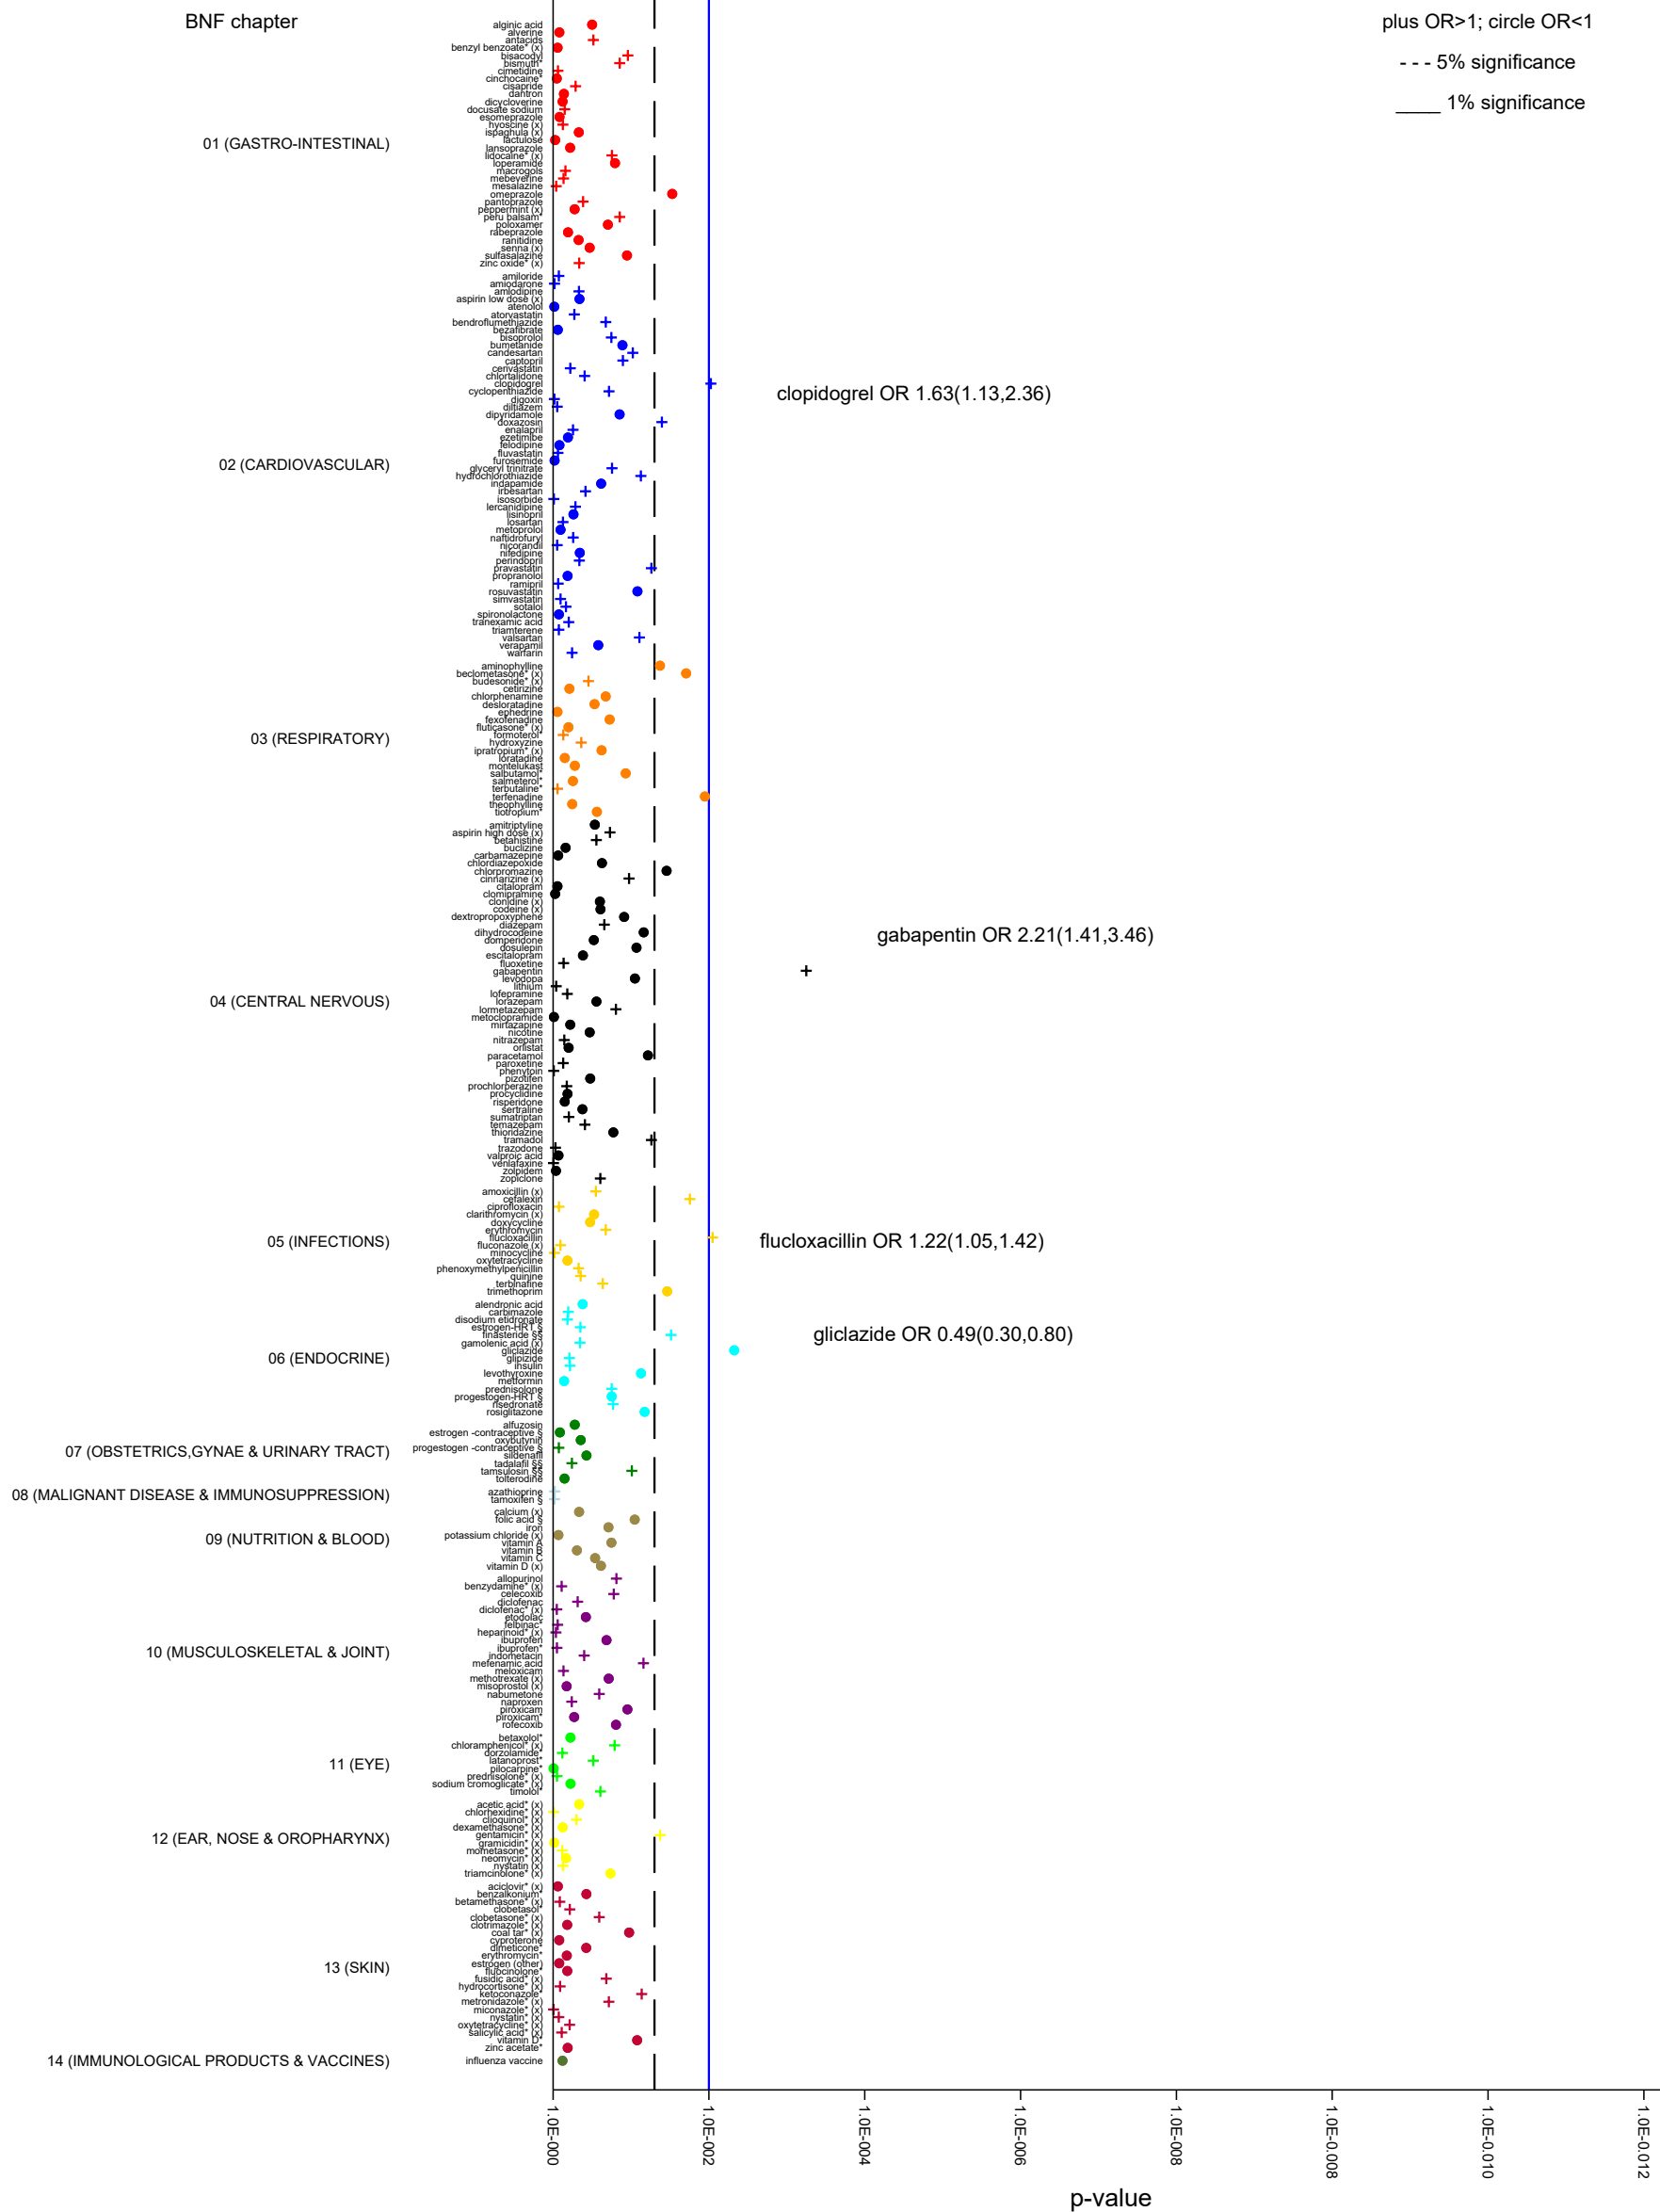

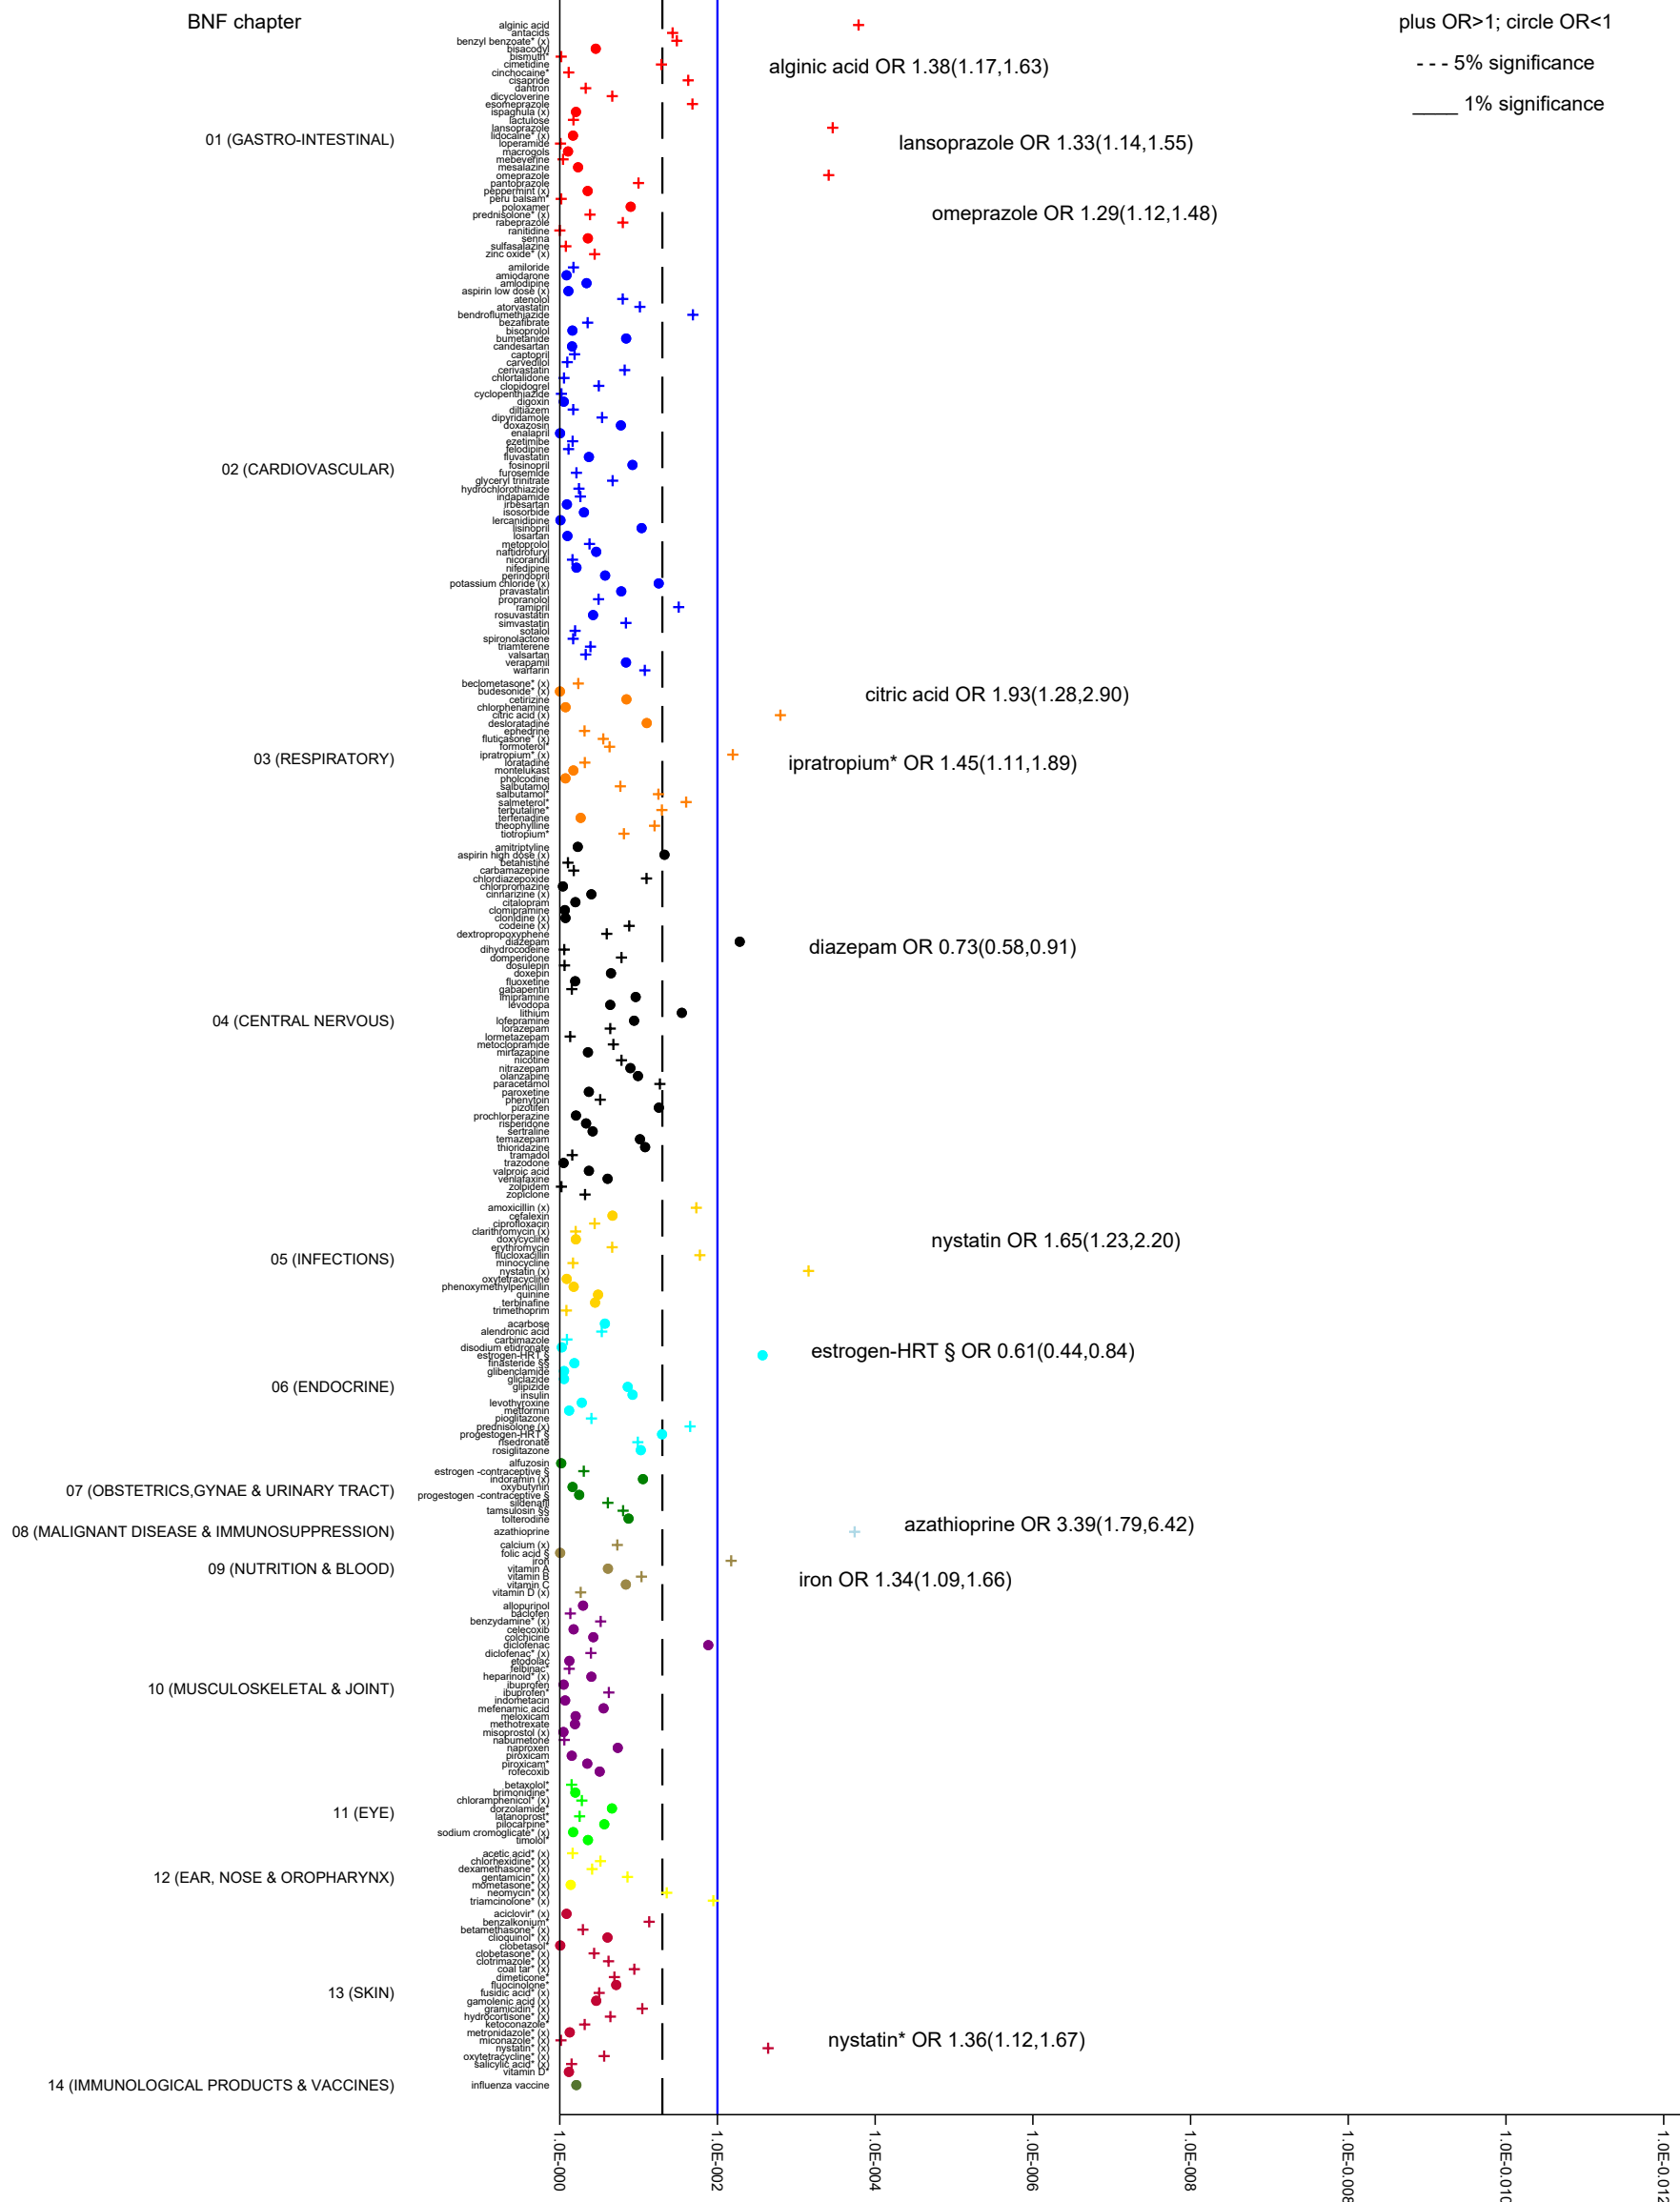



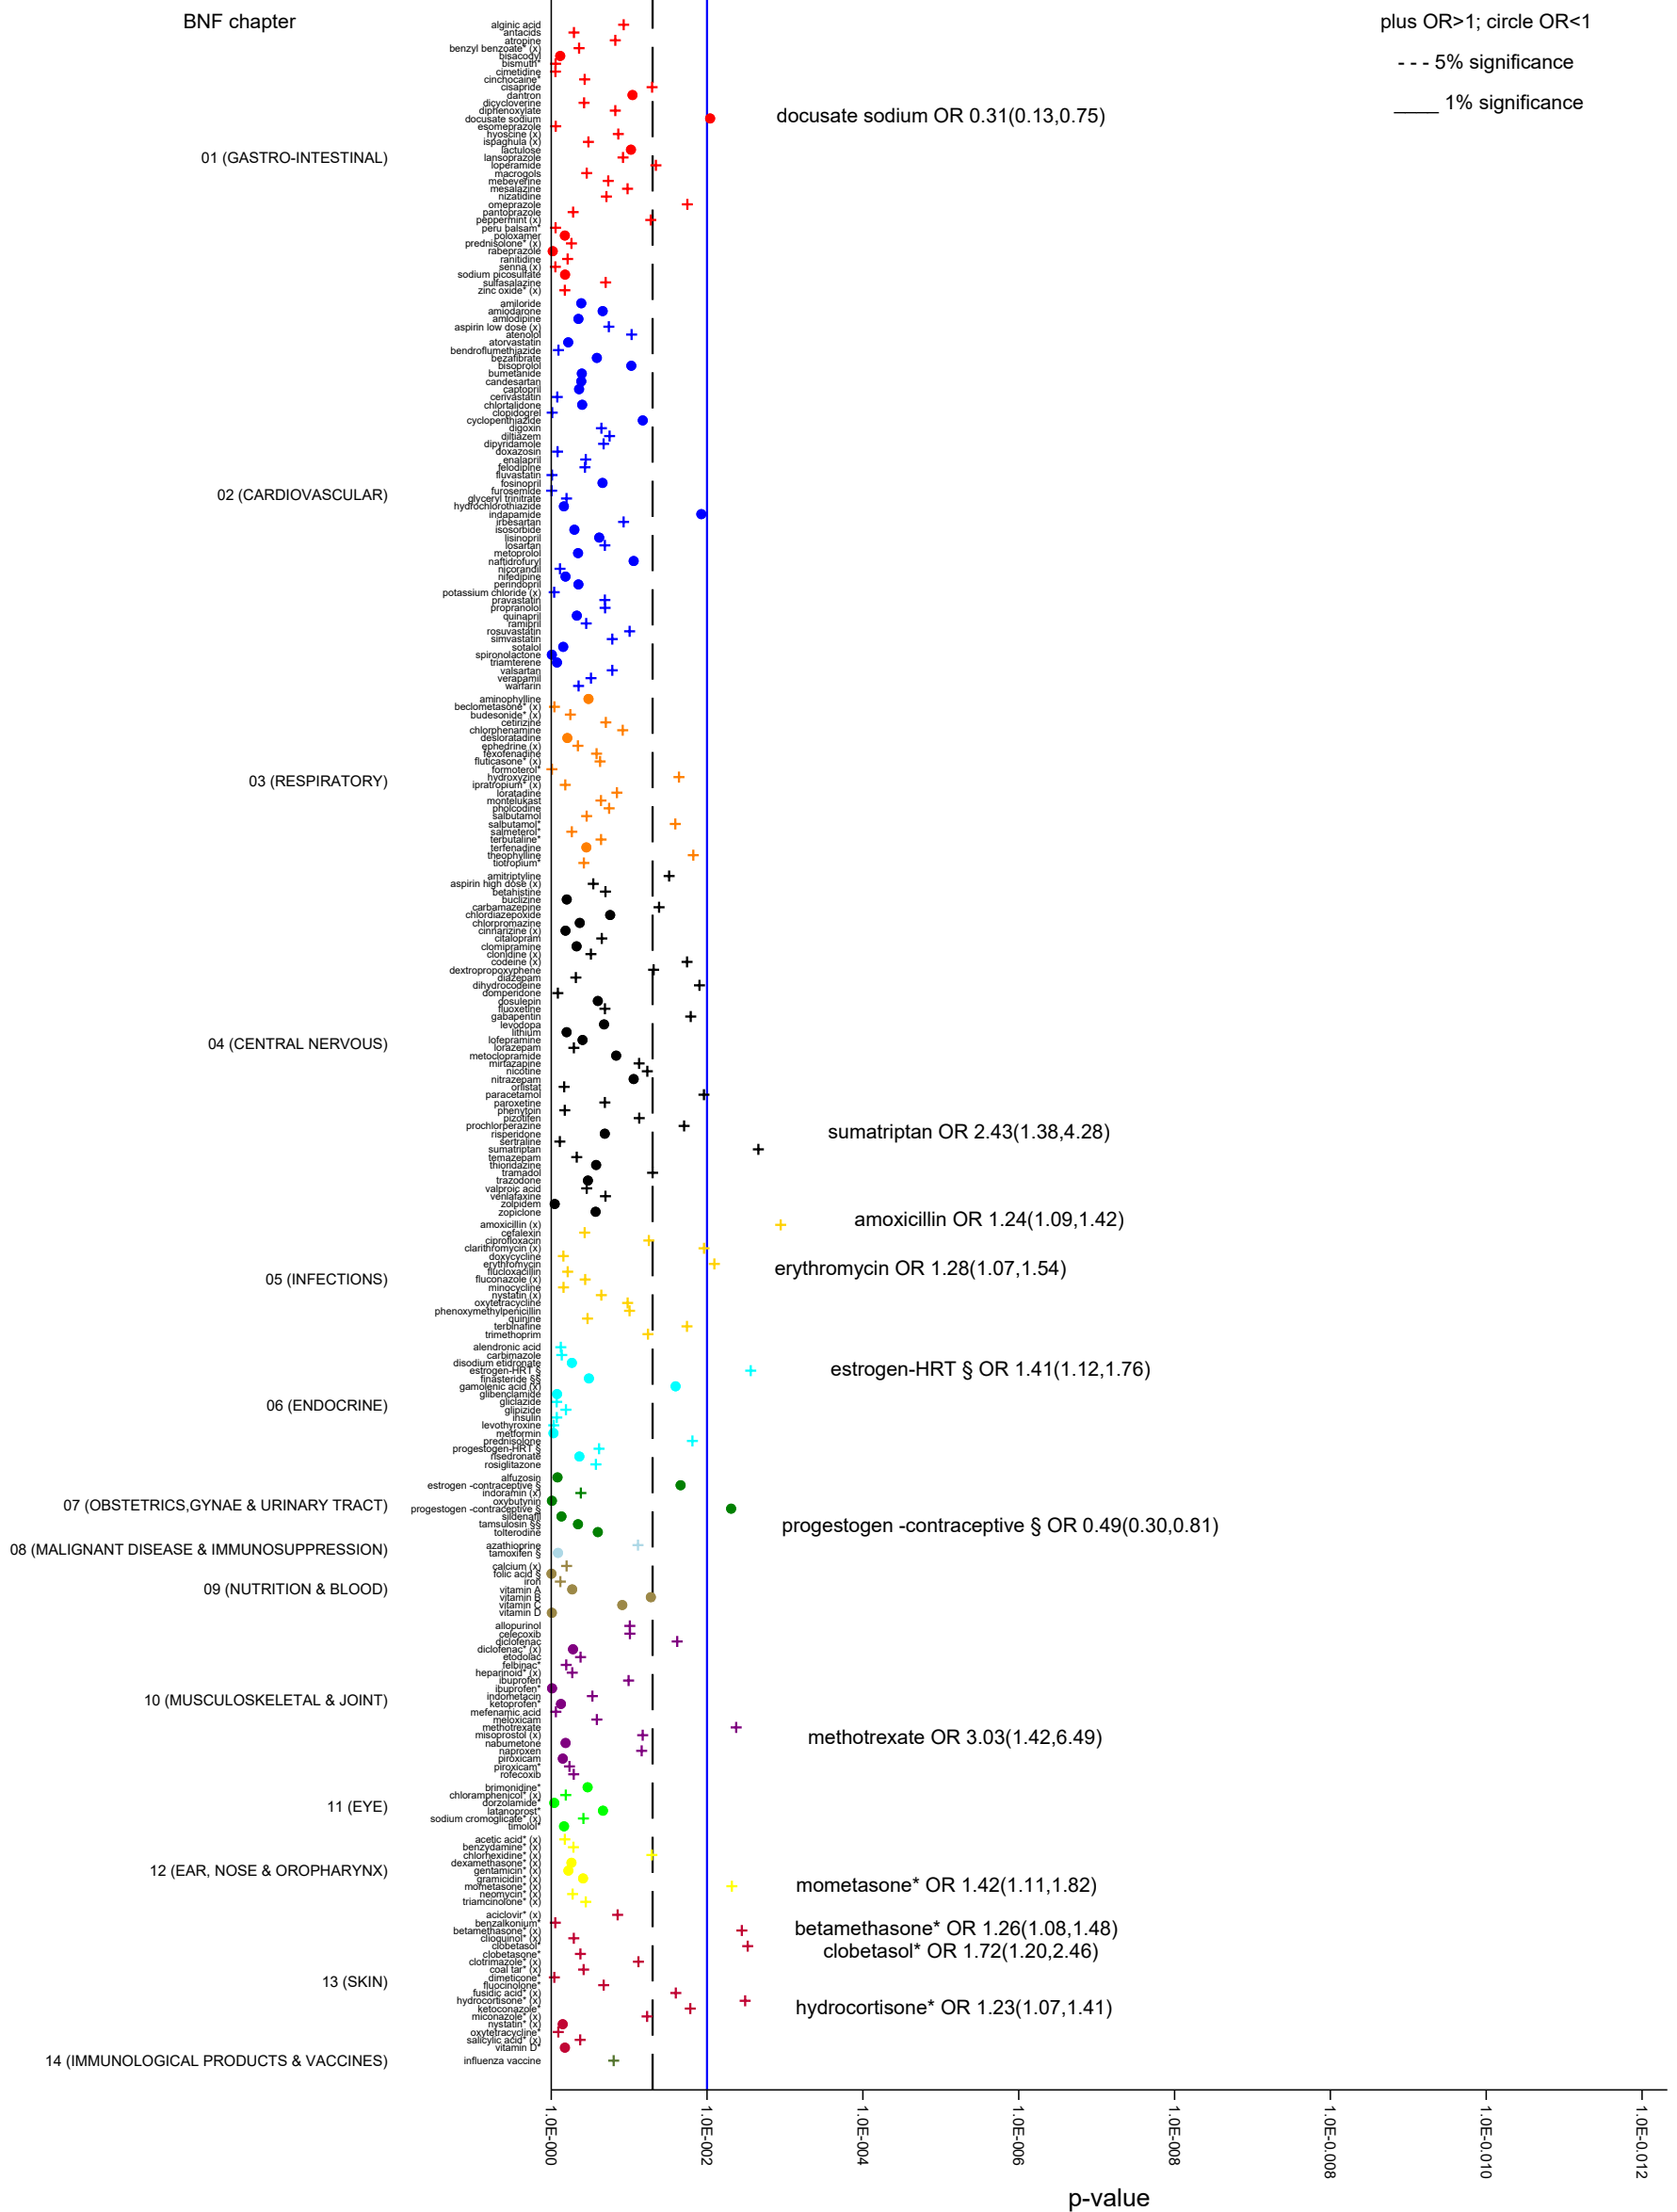

Comorbidity & smoking adjusted analysis (exposure any prescription)

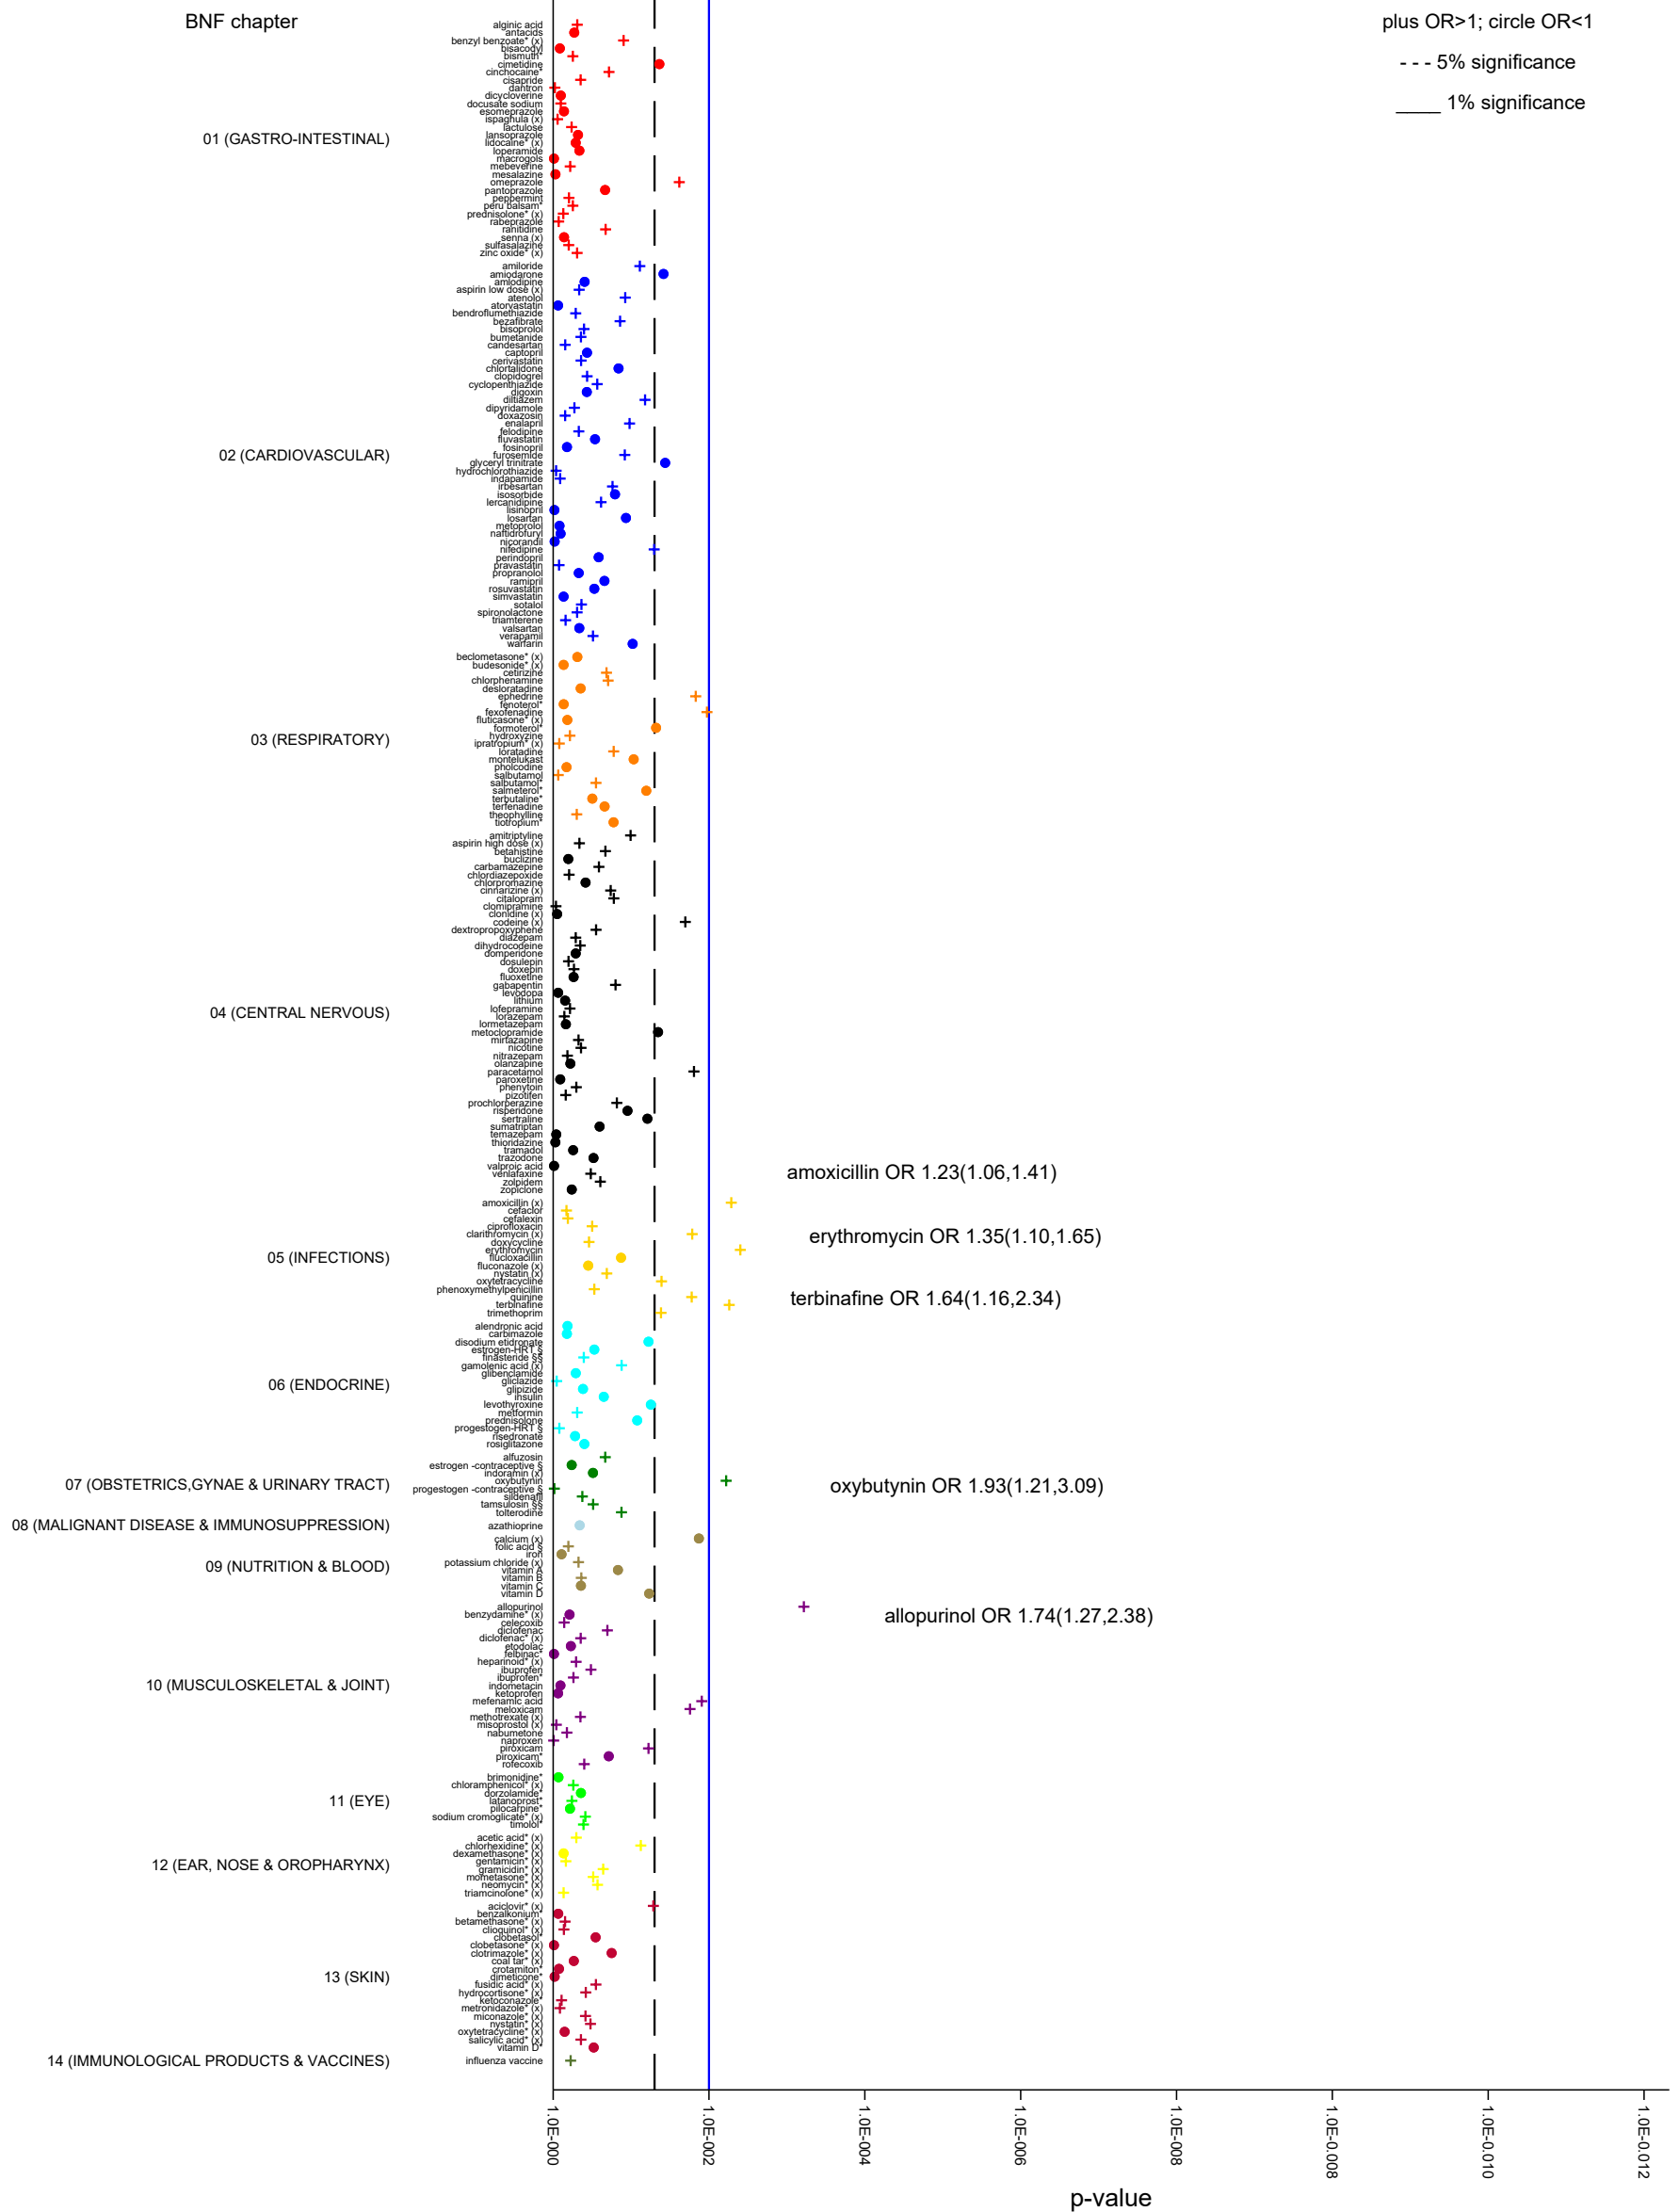

Comorbidity & smoking adjusted analysis (exposure any prescription)

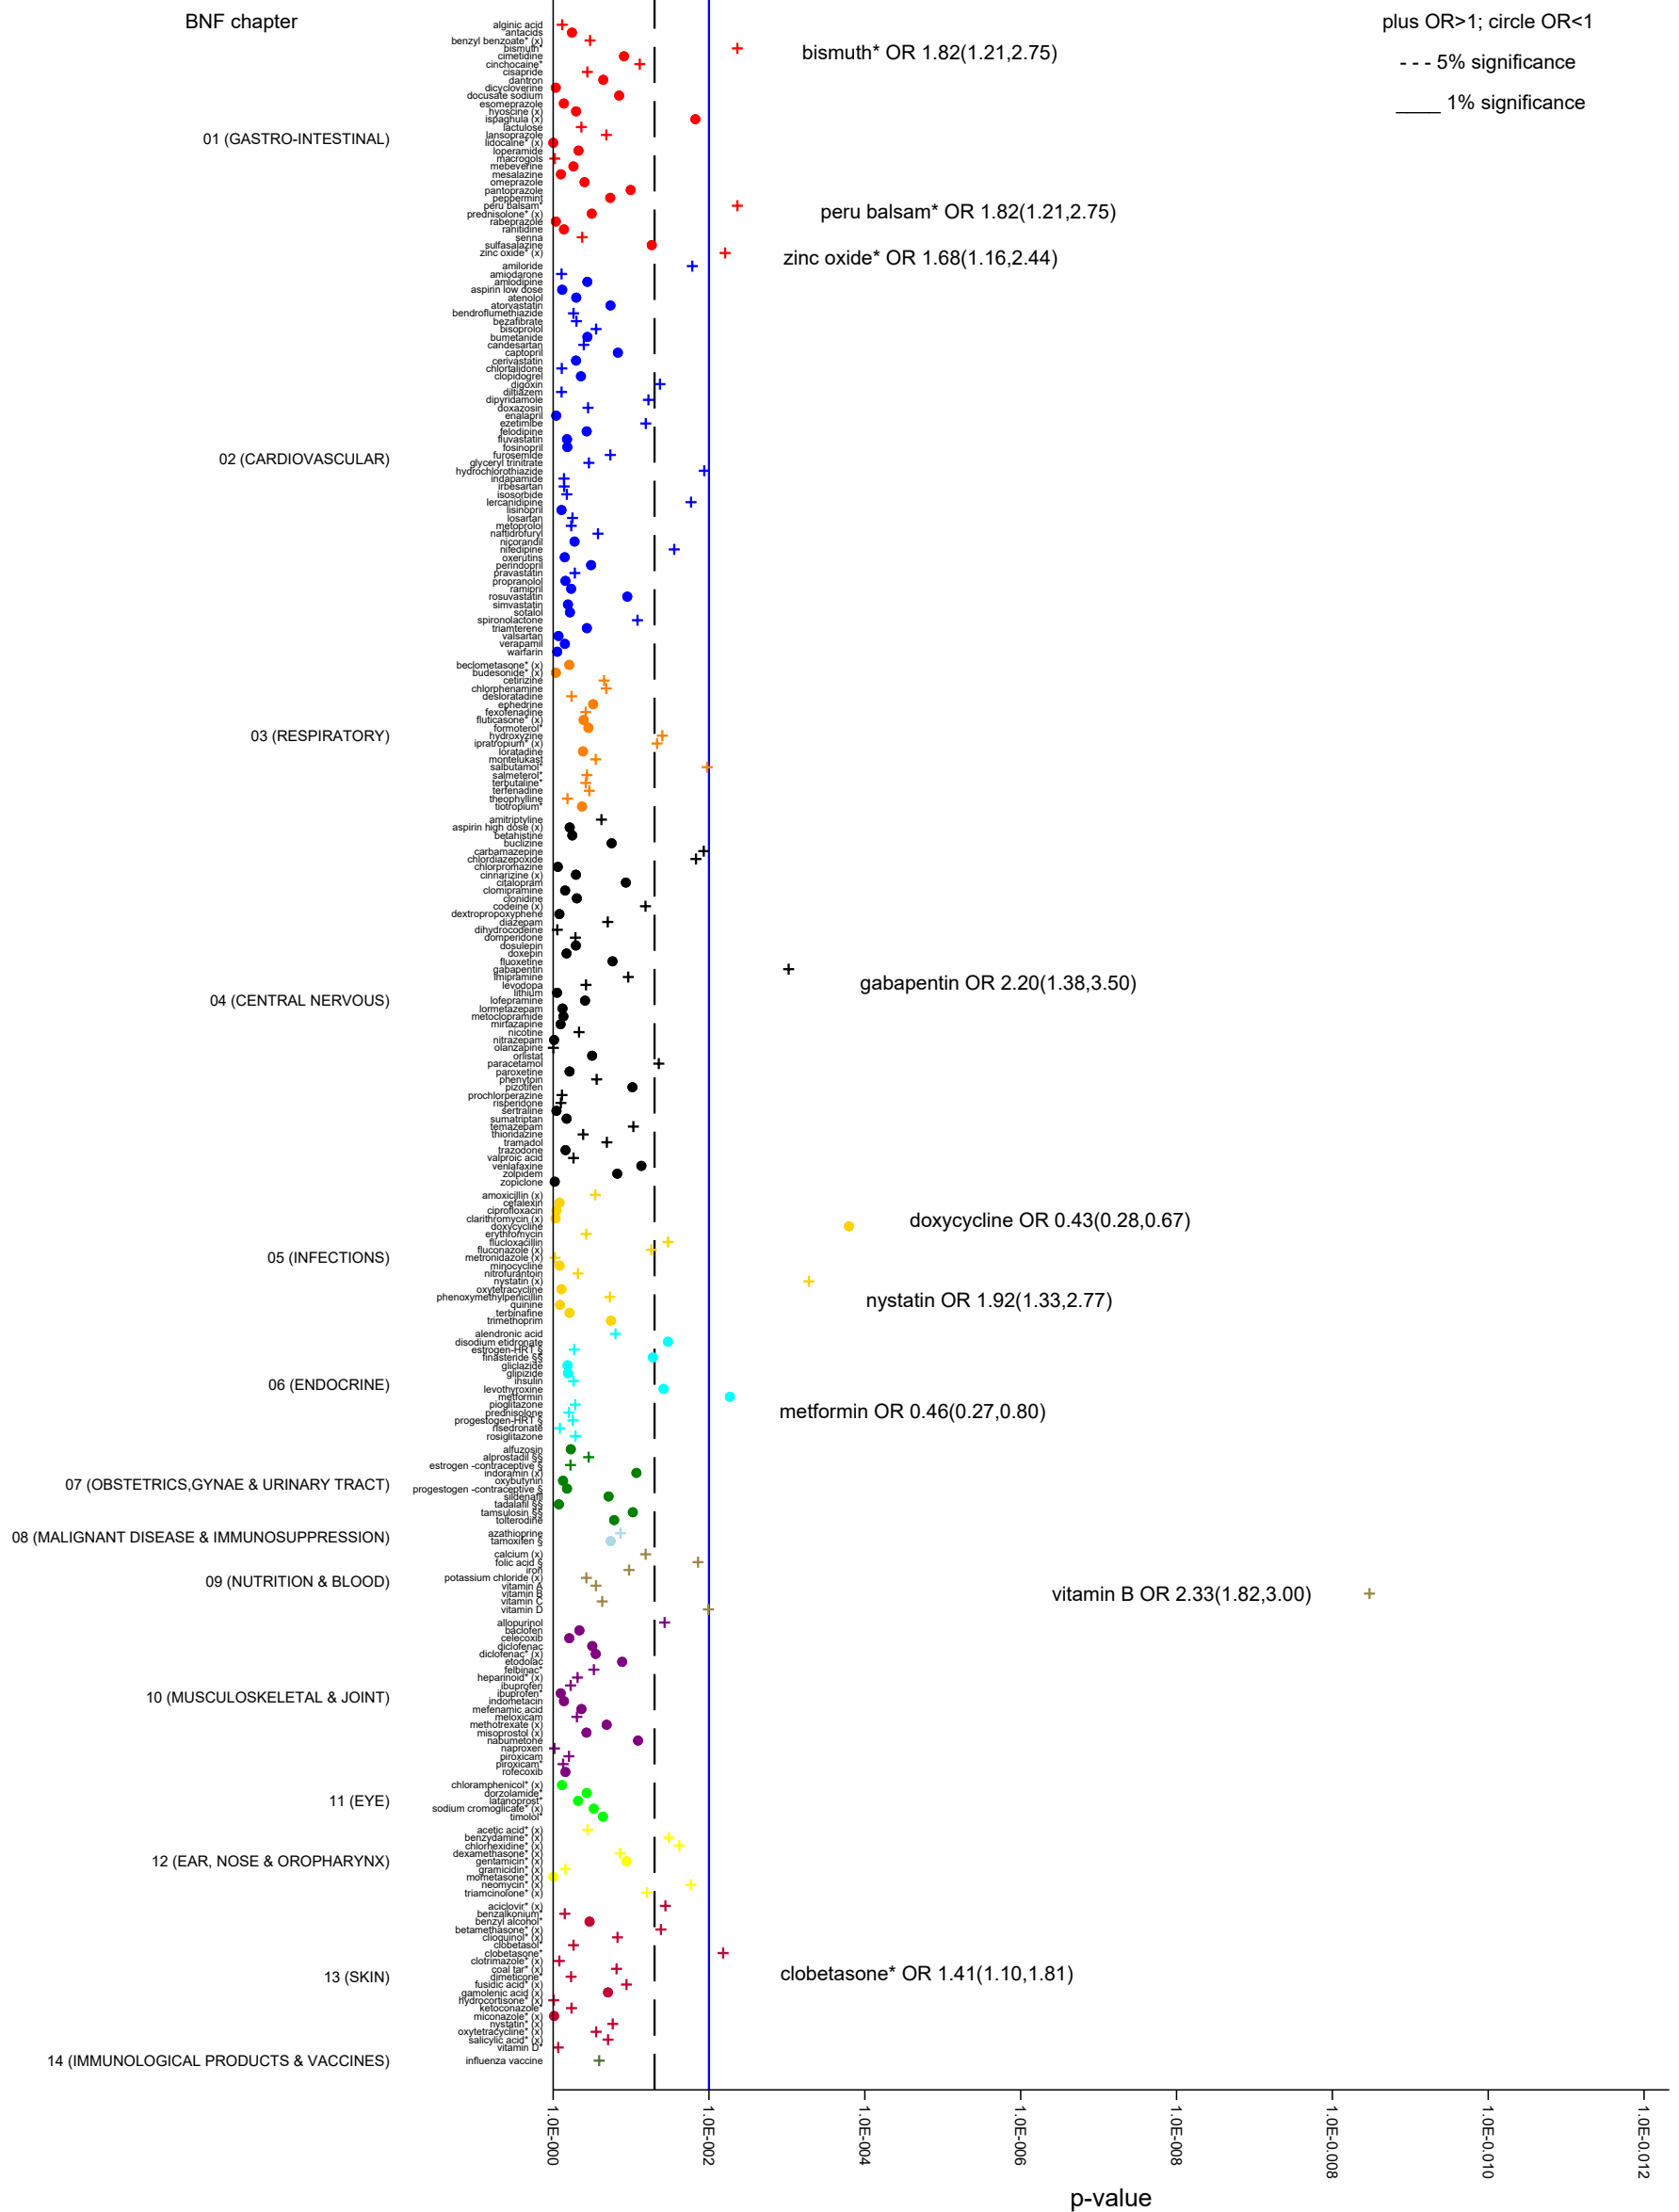

Comorbidity & smoking adjusted analysis (exposure any prescription)

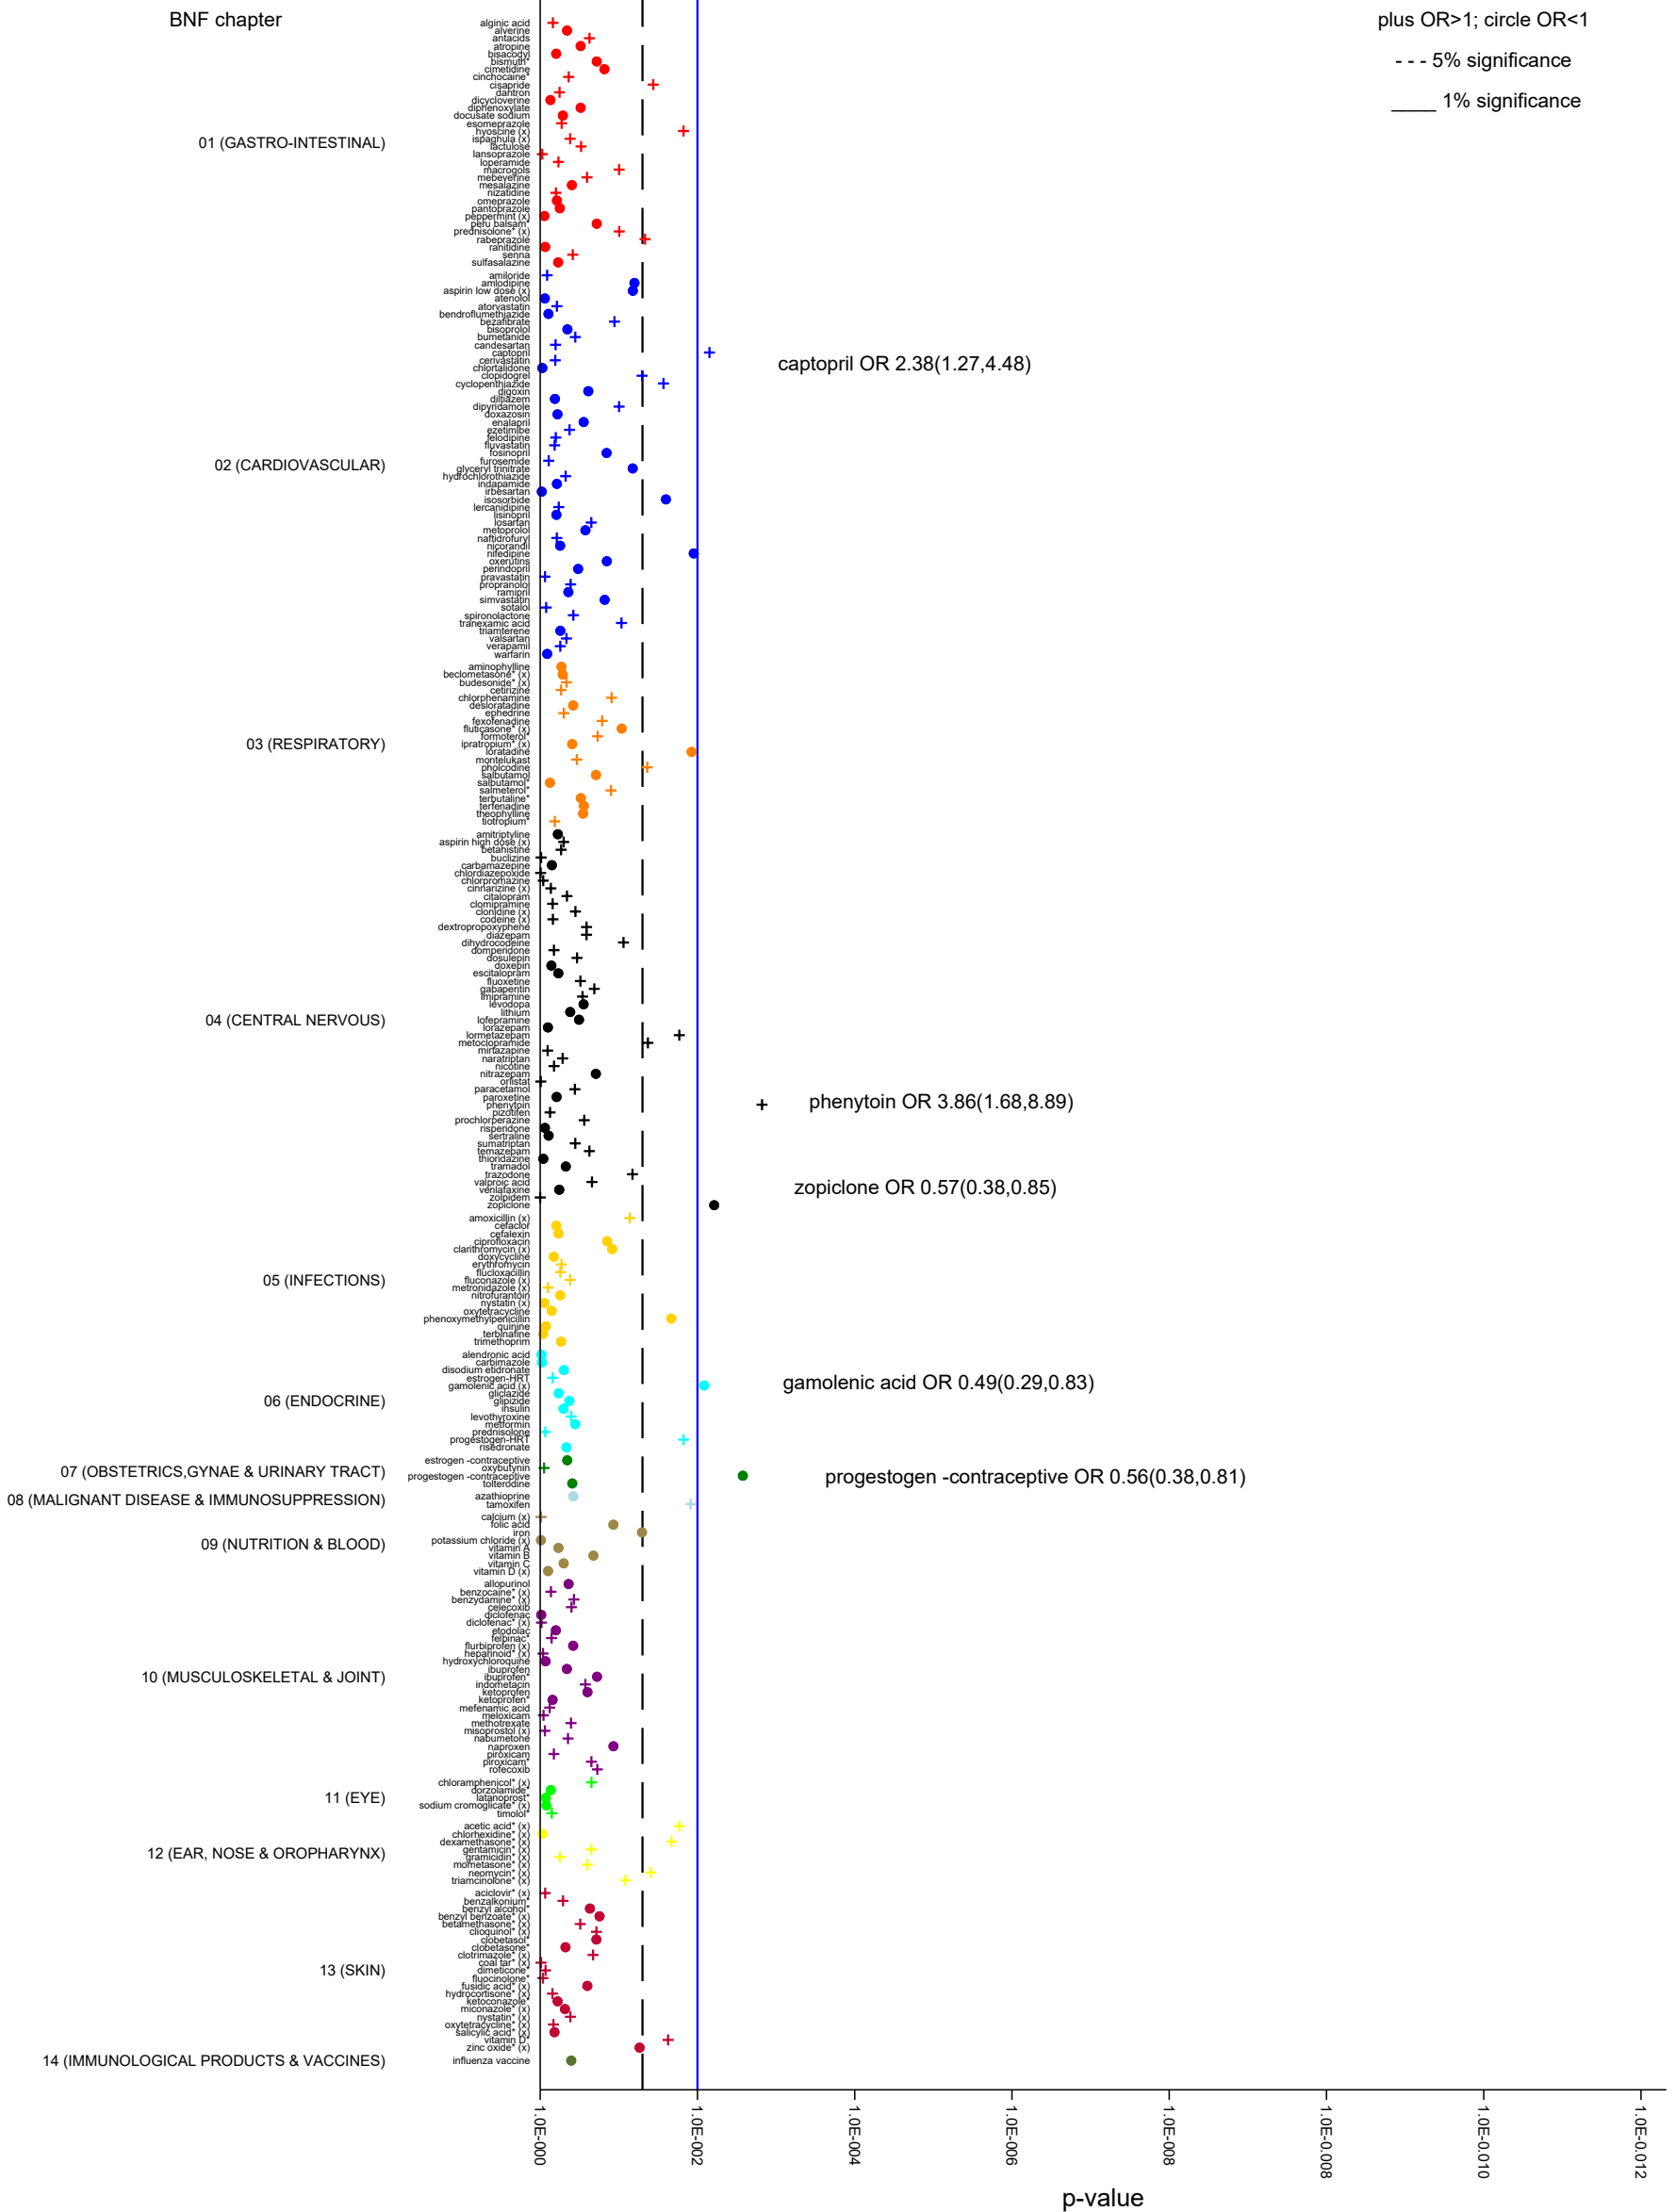

Comorbidity & smoking adjusted analysis (exposure any prescription)

BNF chapter

plus OR>1; circle OR<1

--- 5% significance

— 1% significance

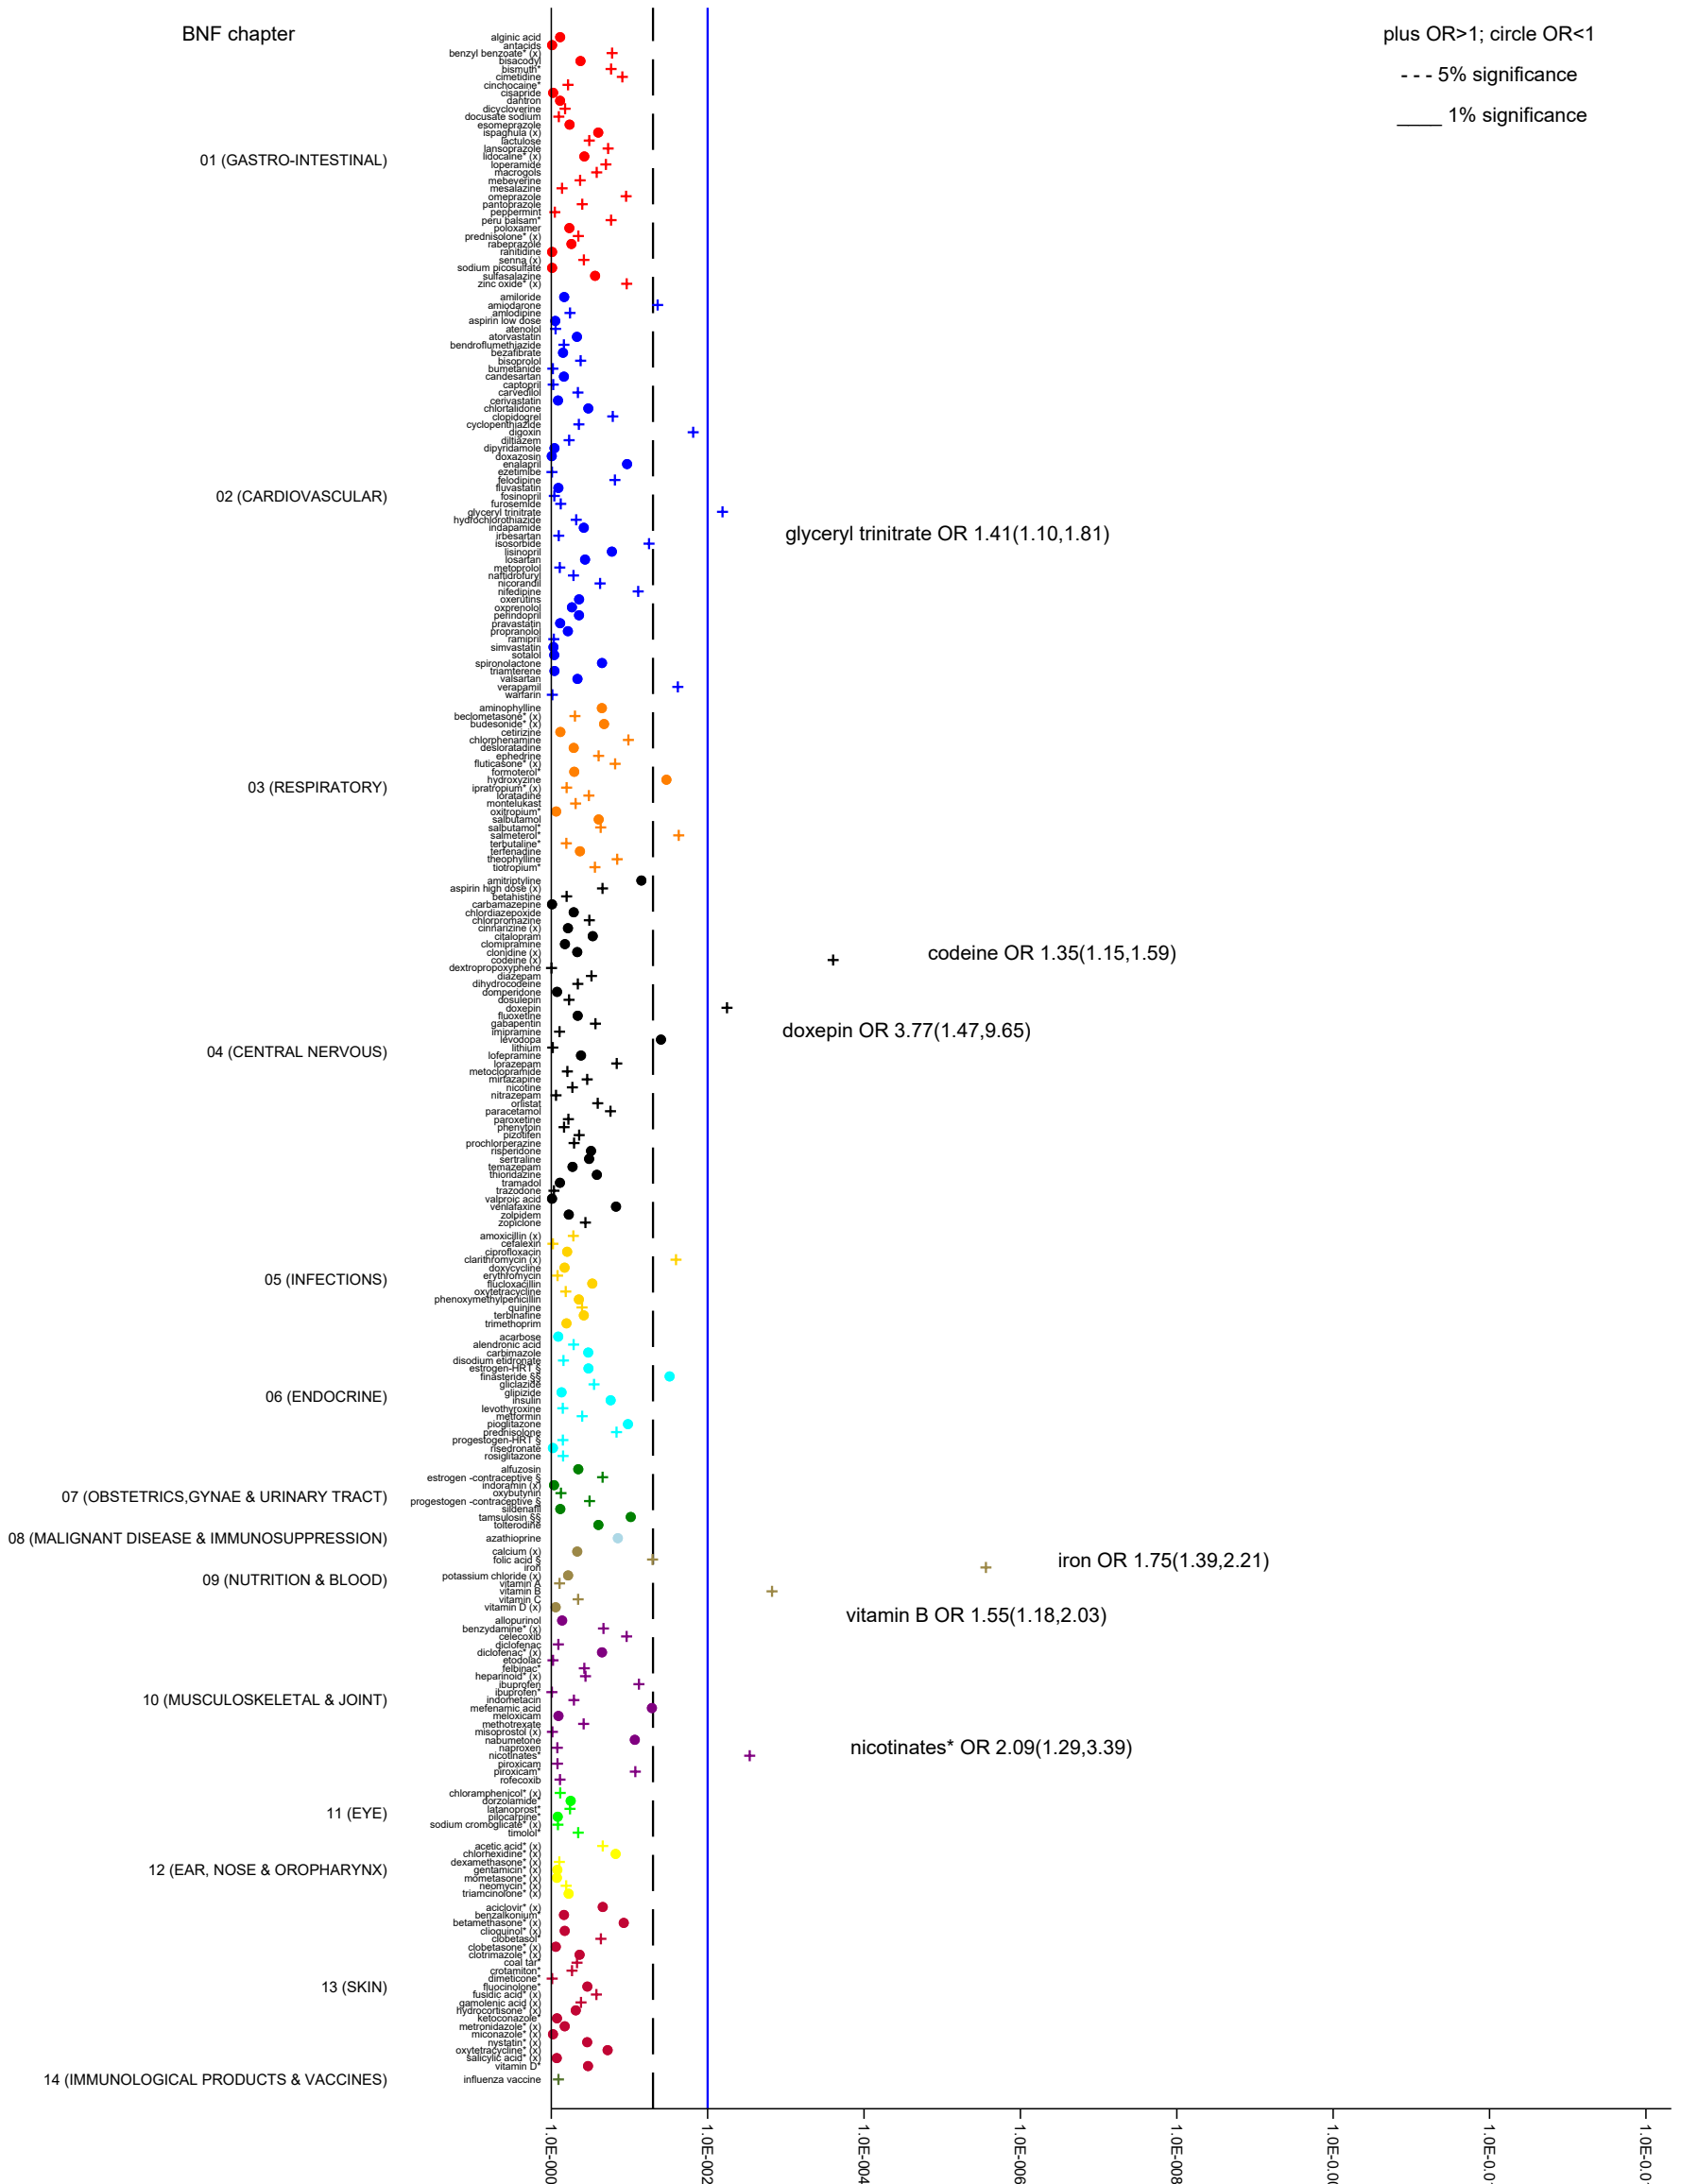

p-value

\* : local medicine; § females only; §§ males only; (x) most prevalent chapter

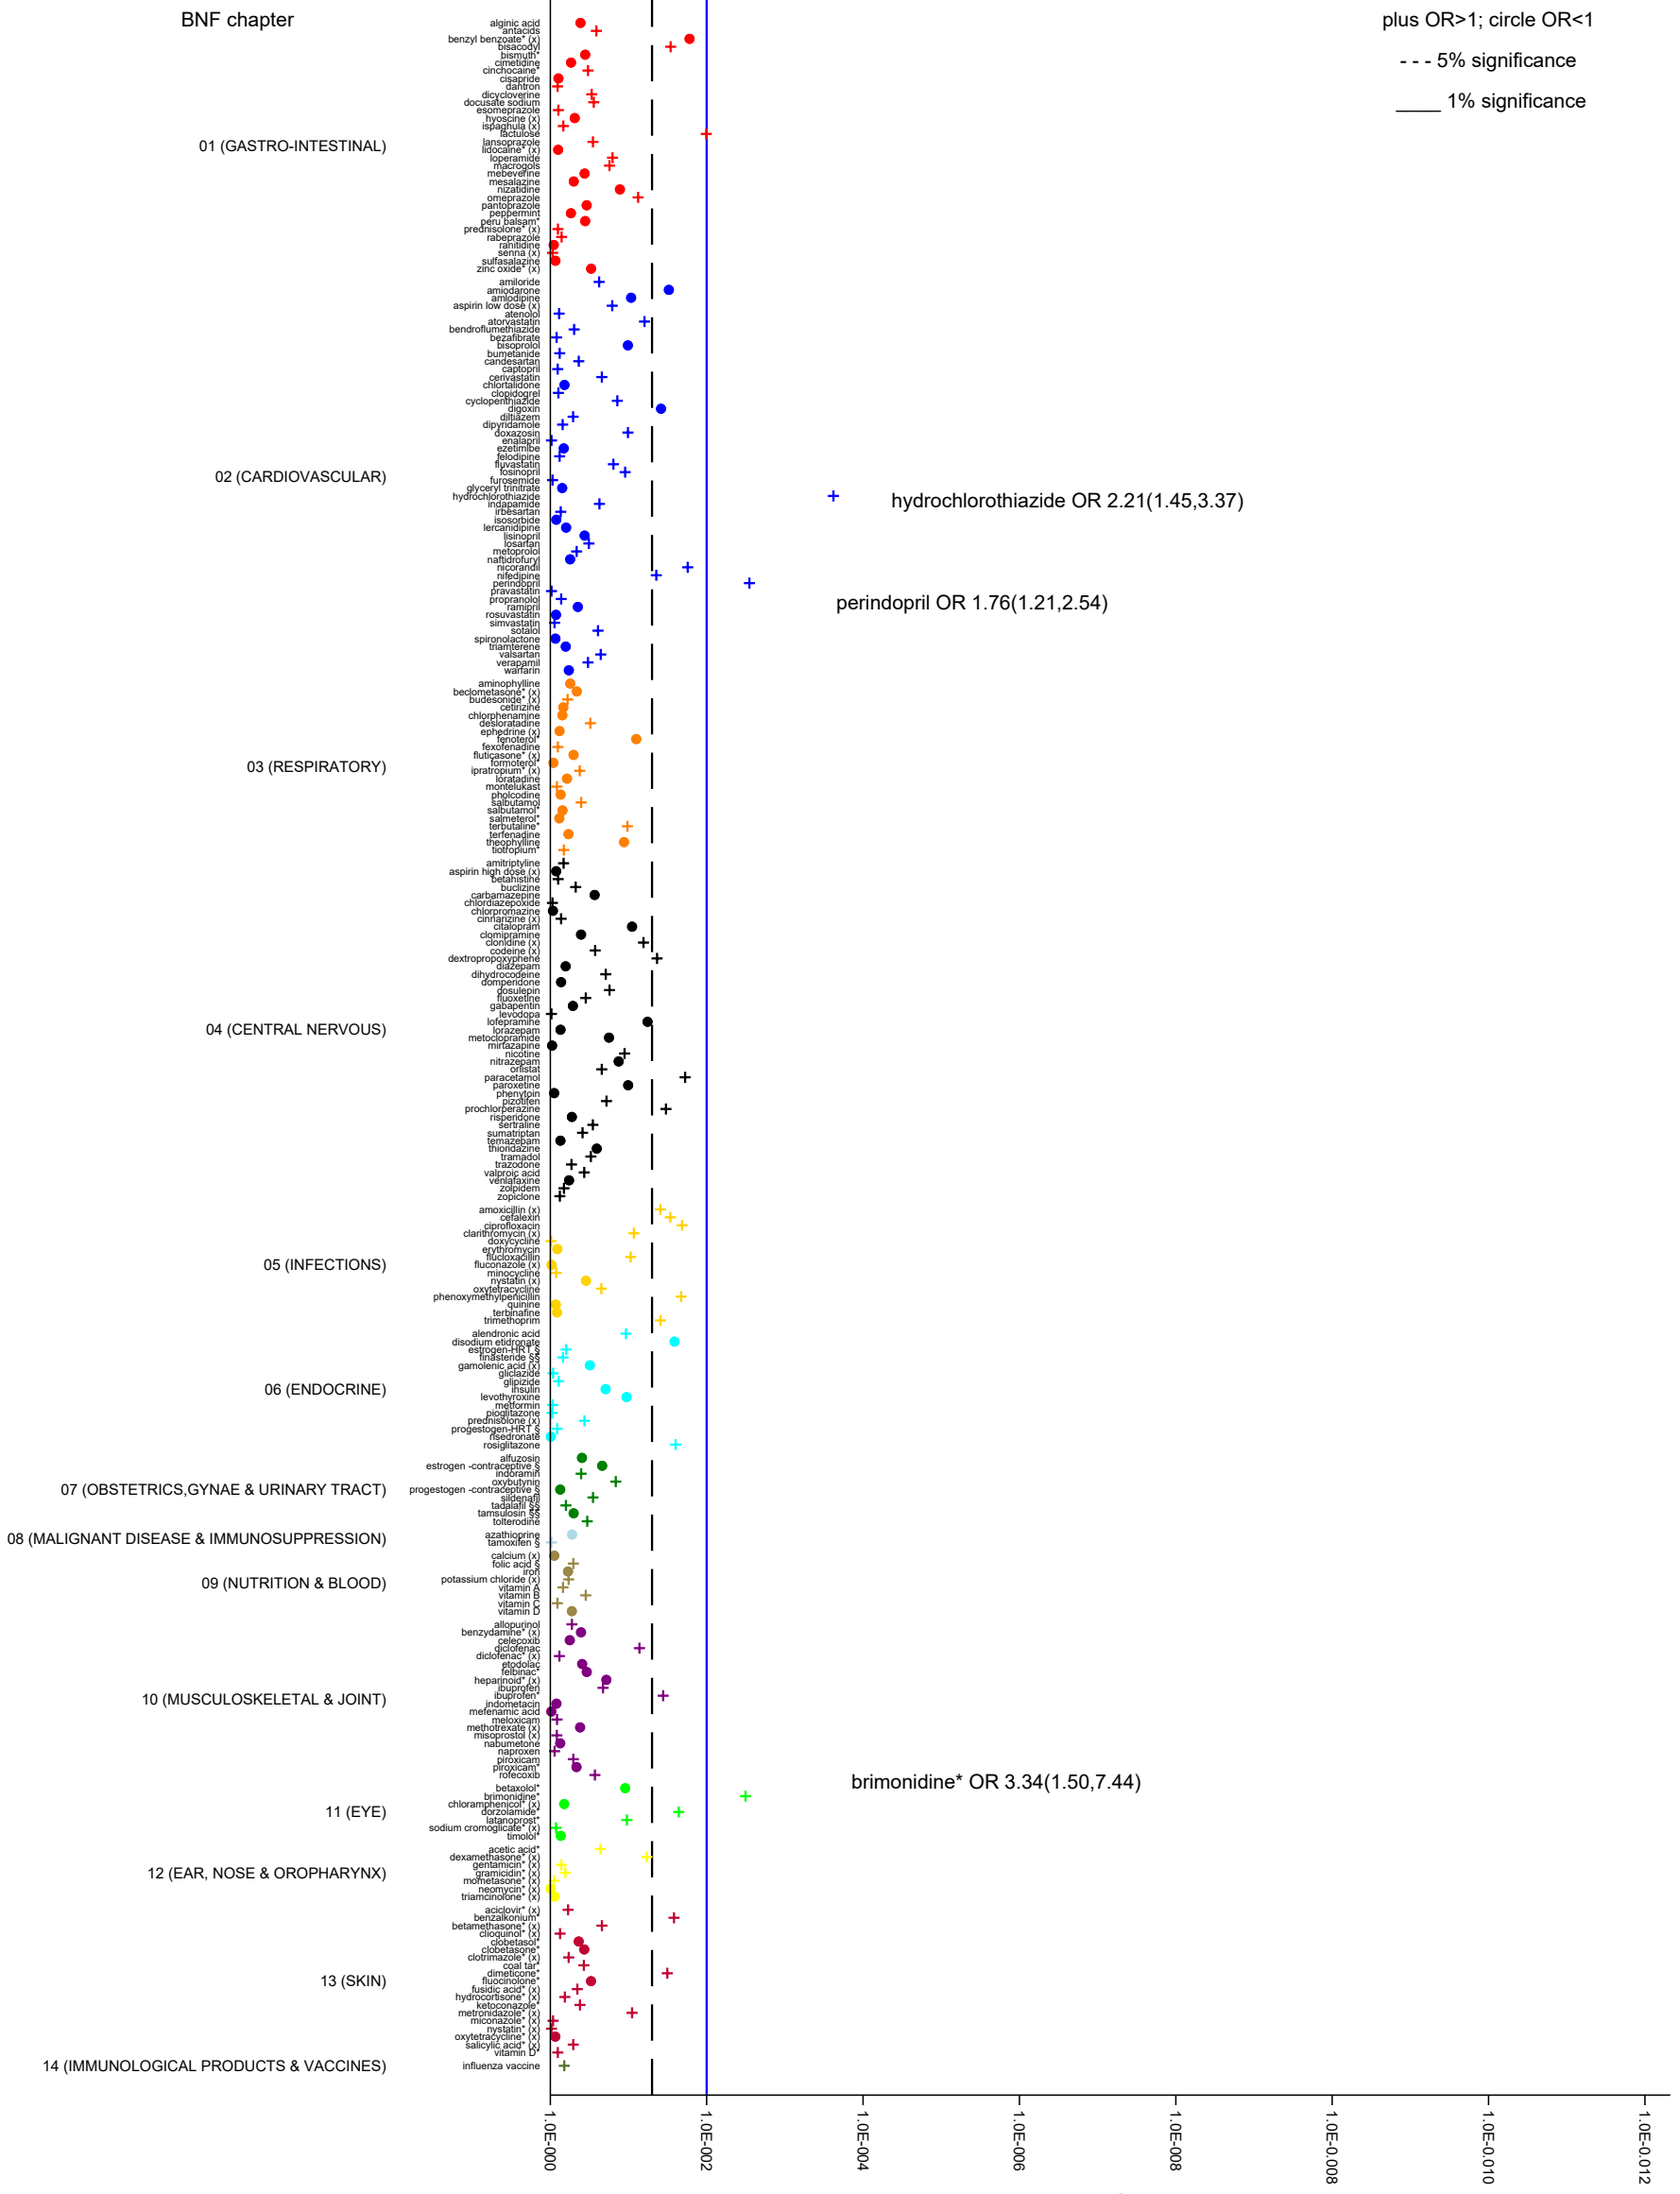

Comorbidity & smoking adjusted analysis (exposure any prescription)

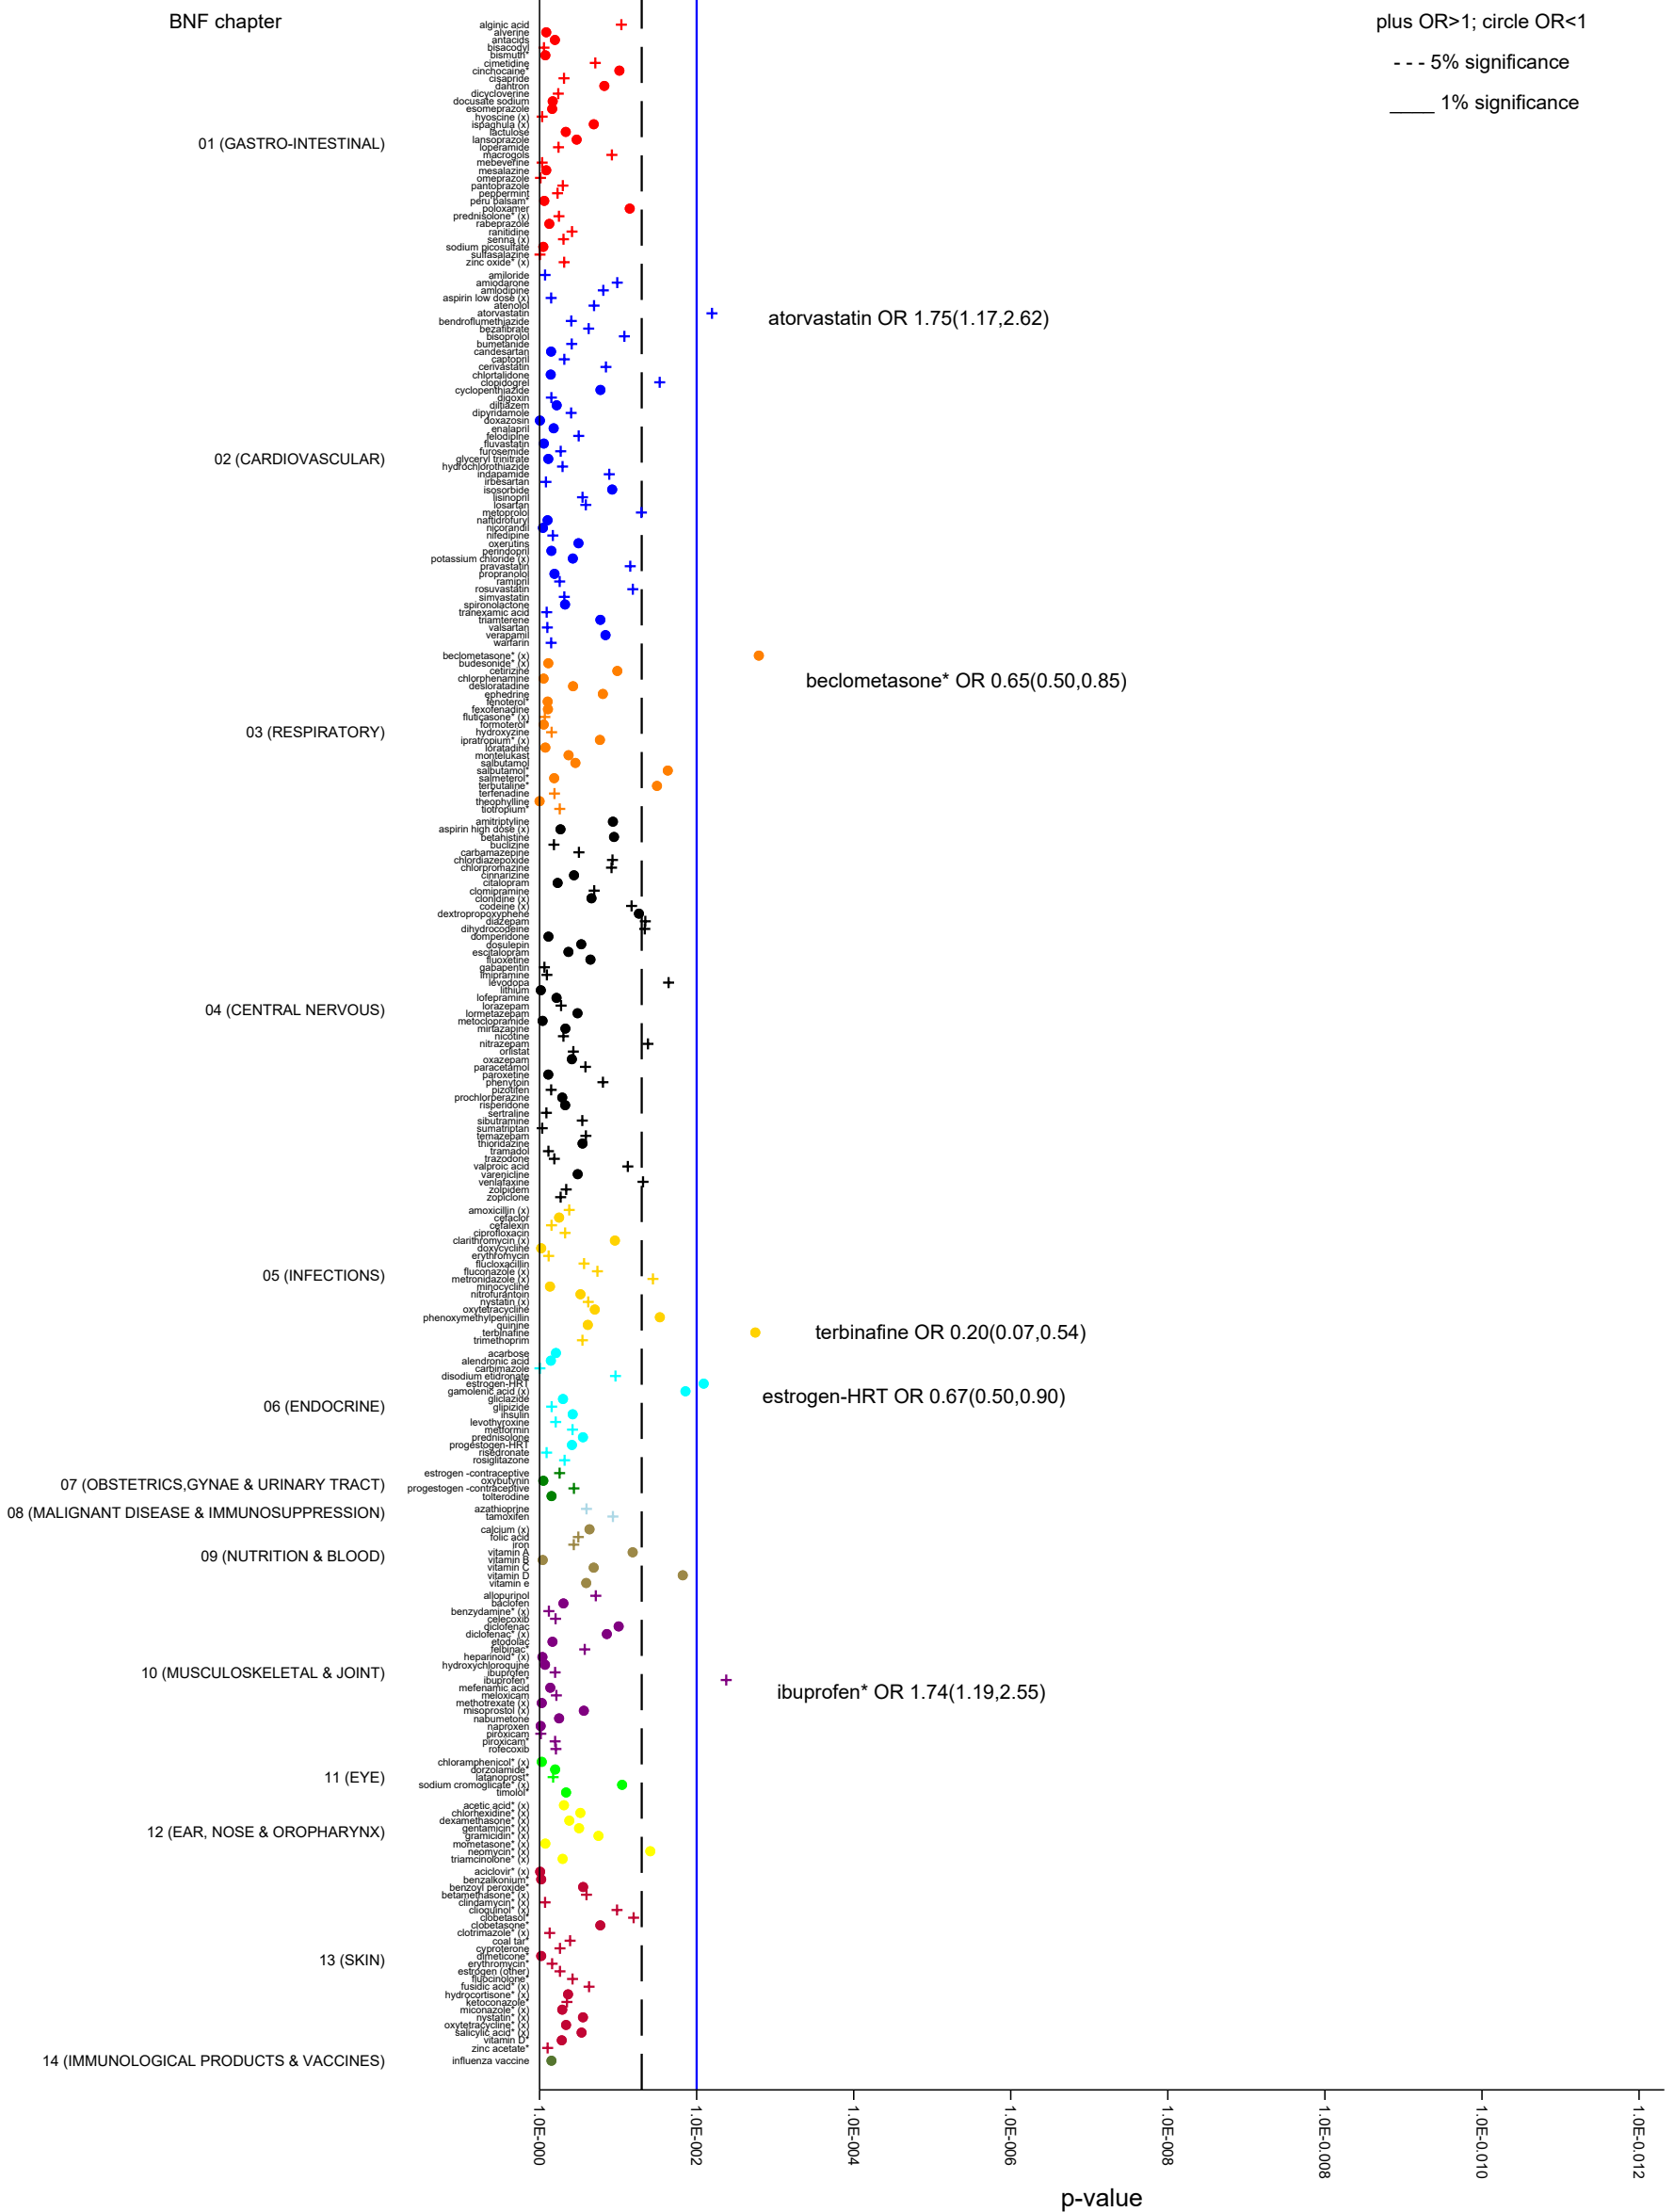

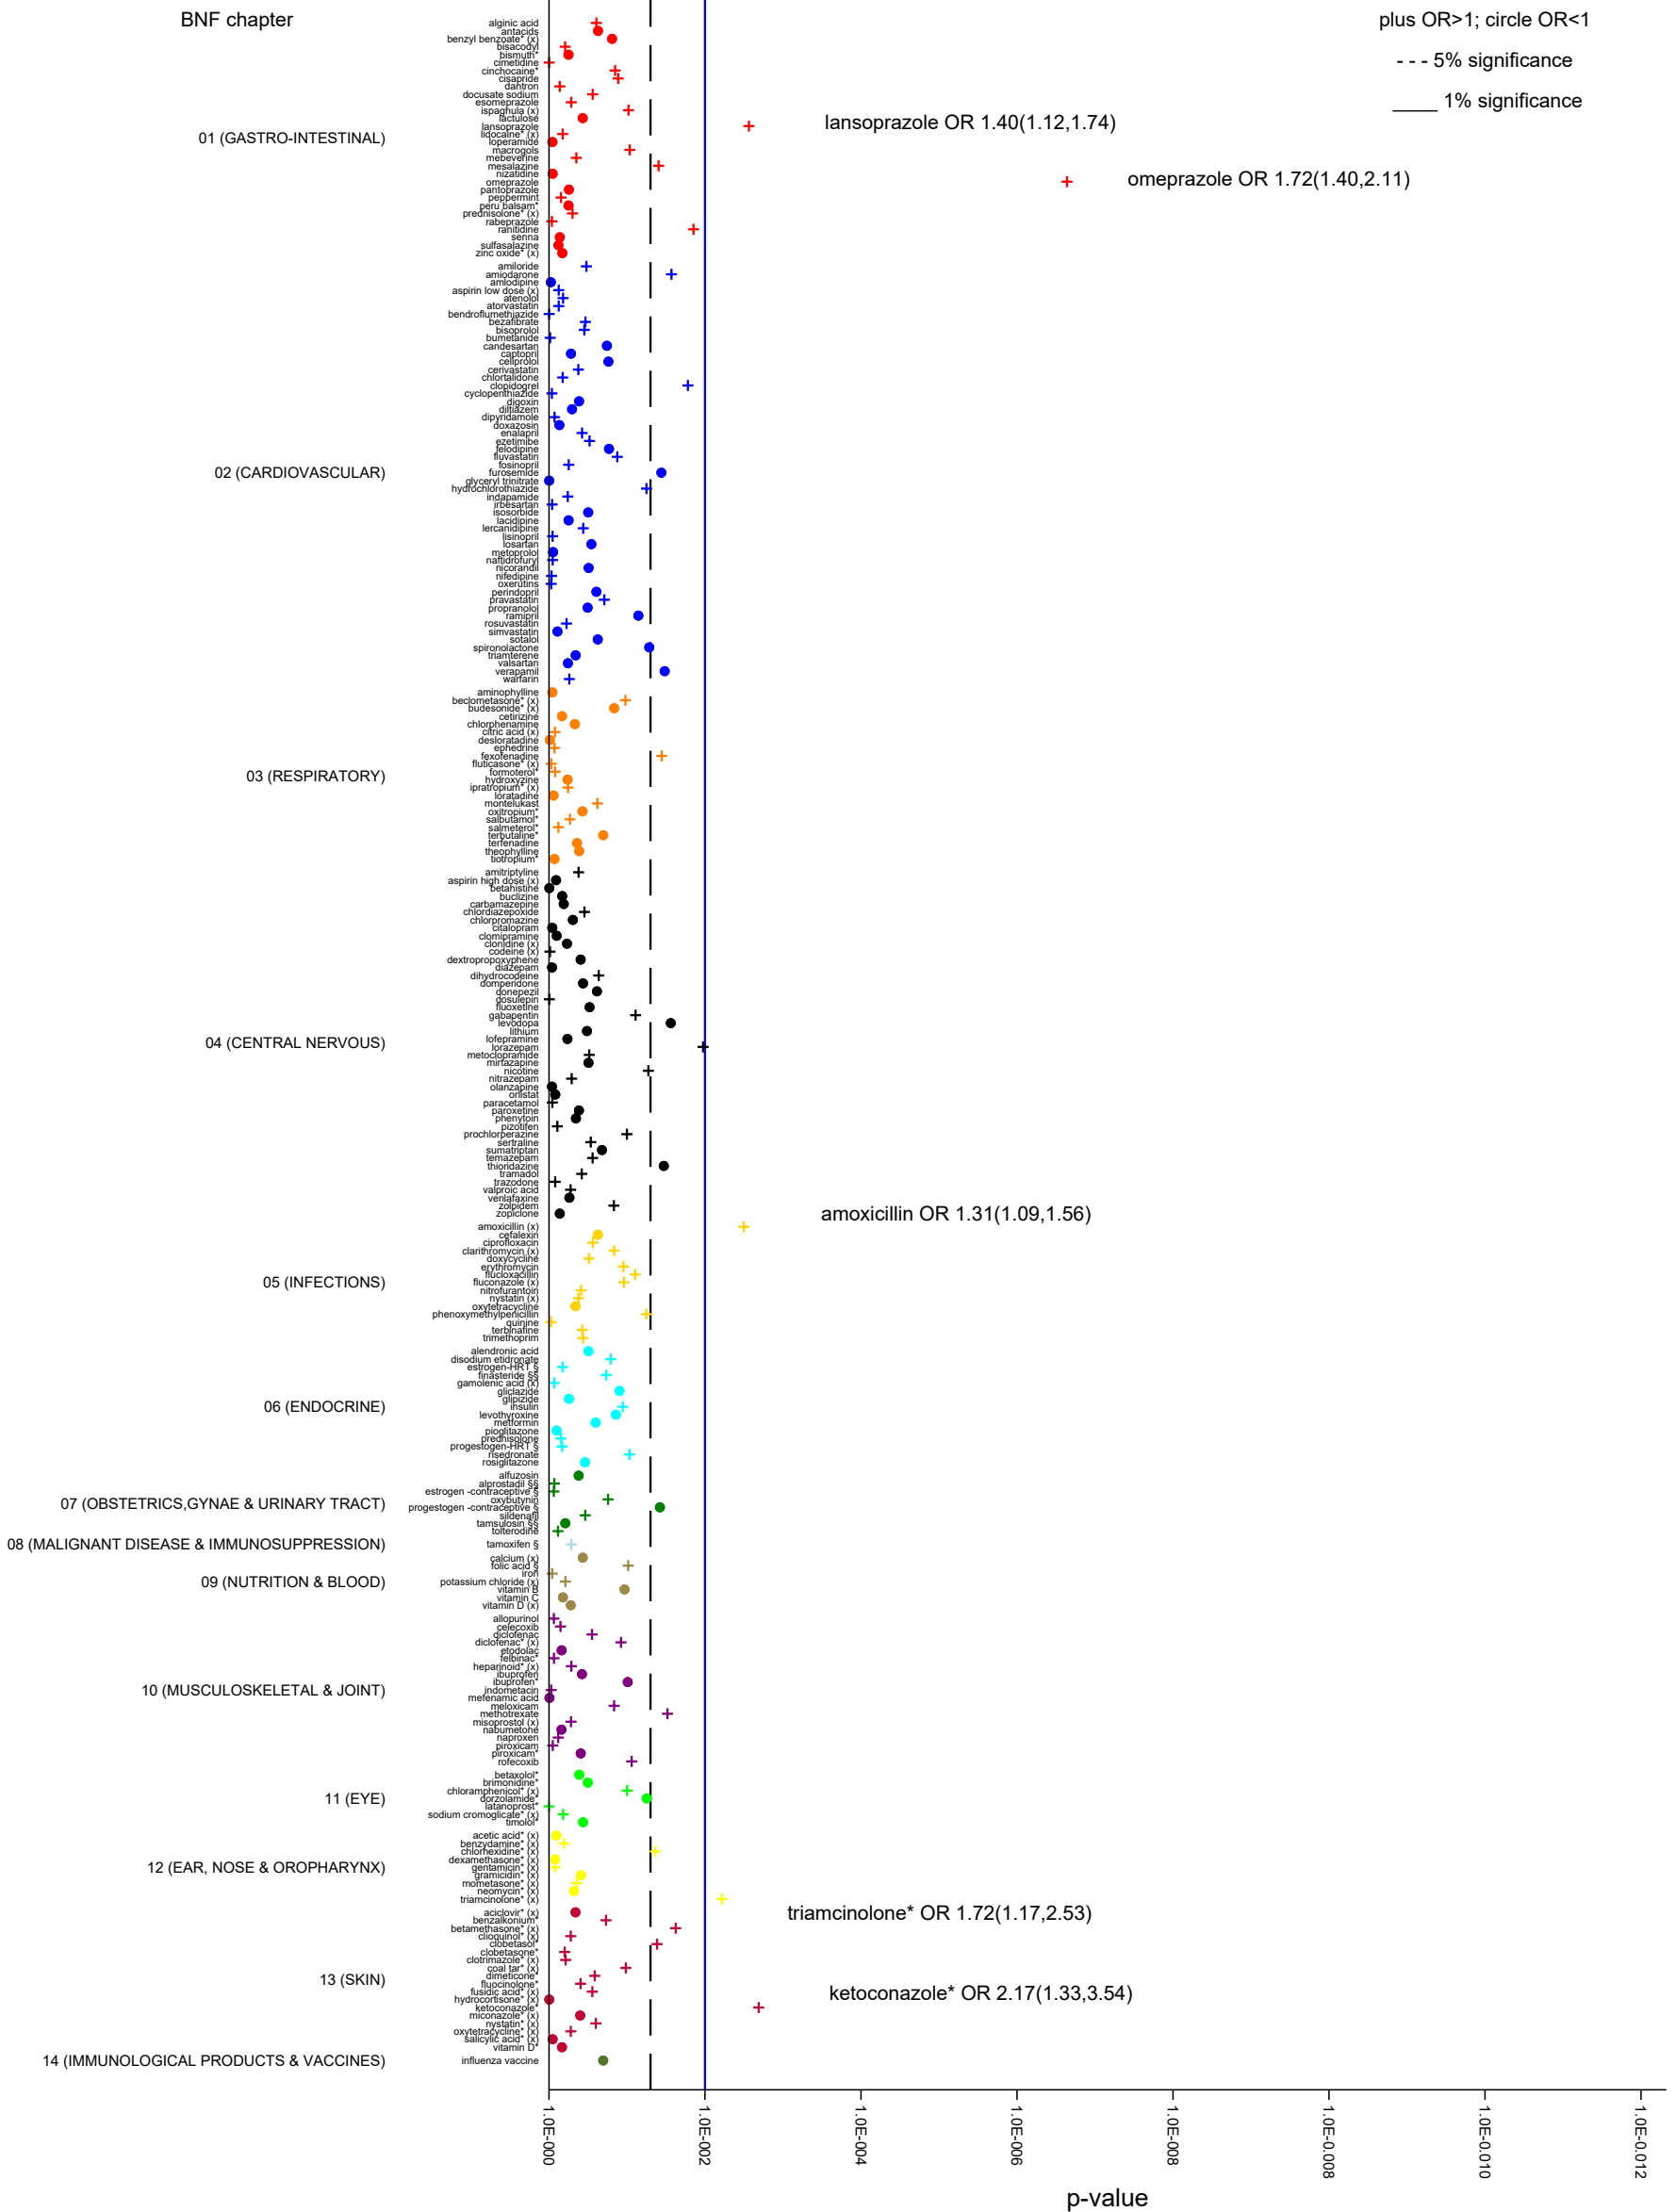



Comorbidity & smoking adjusted analysis (exposure any prescription)

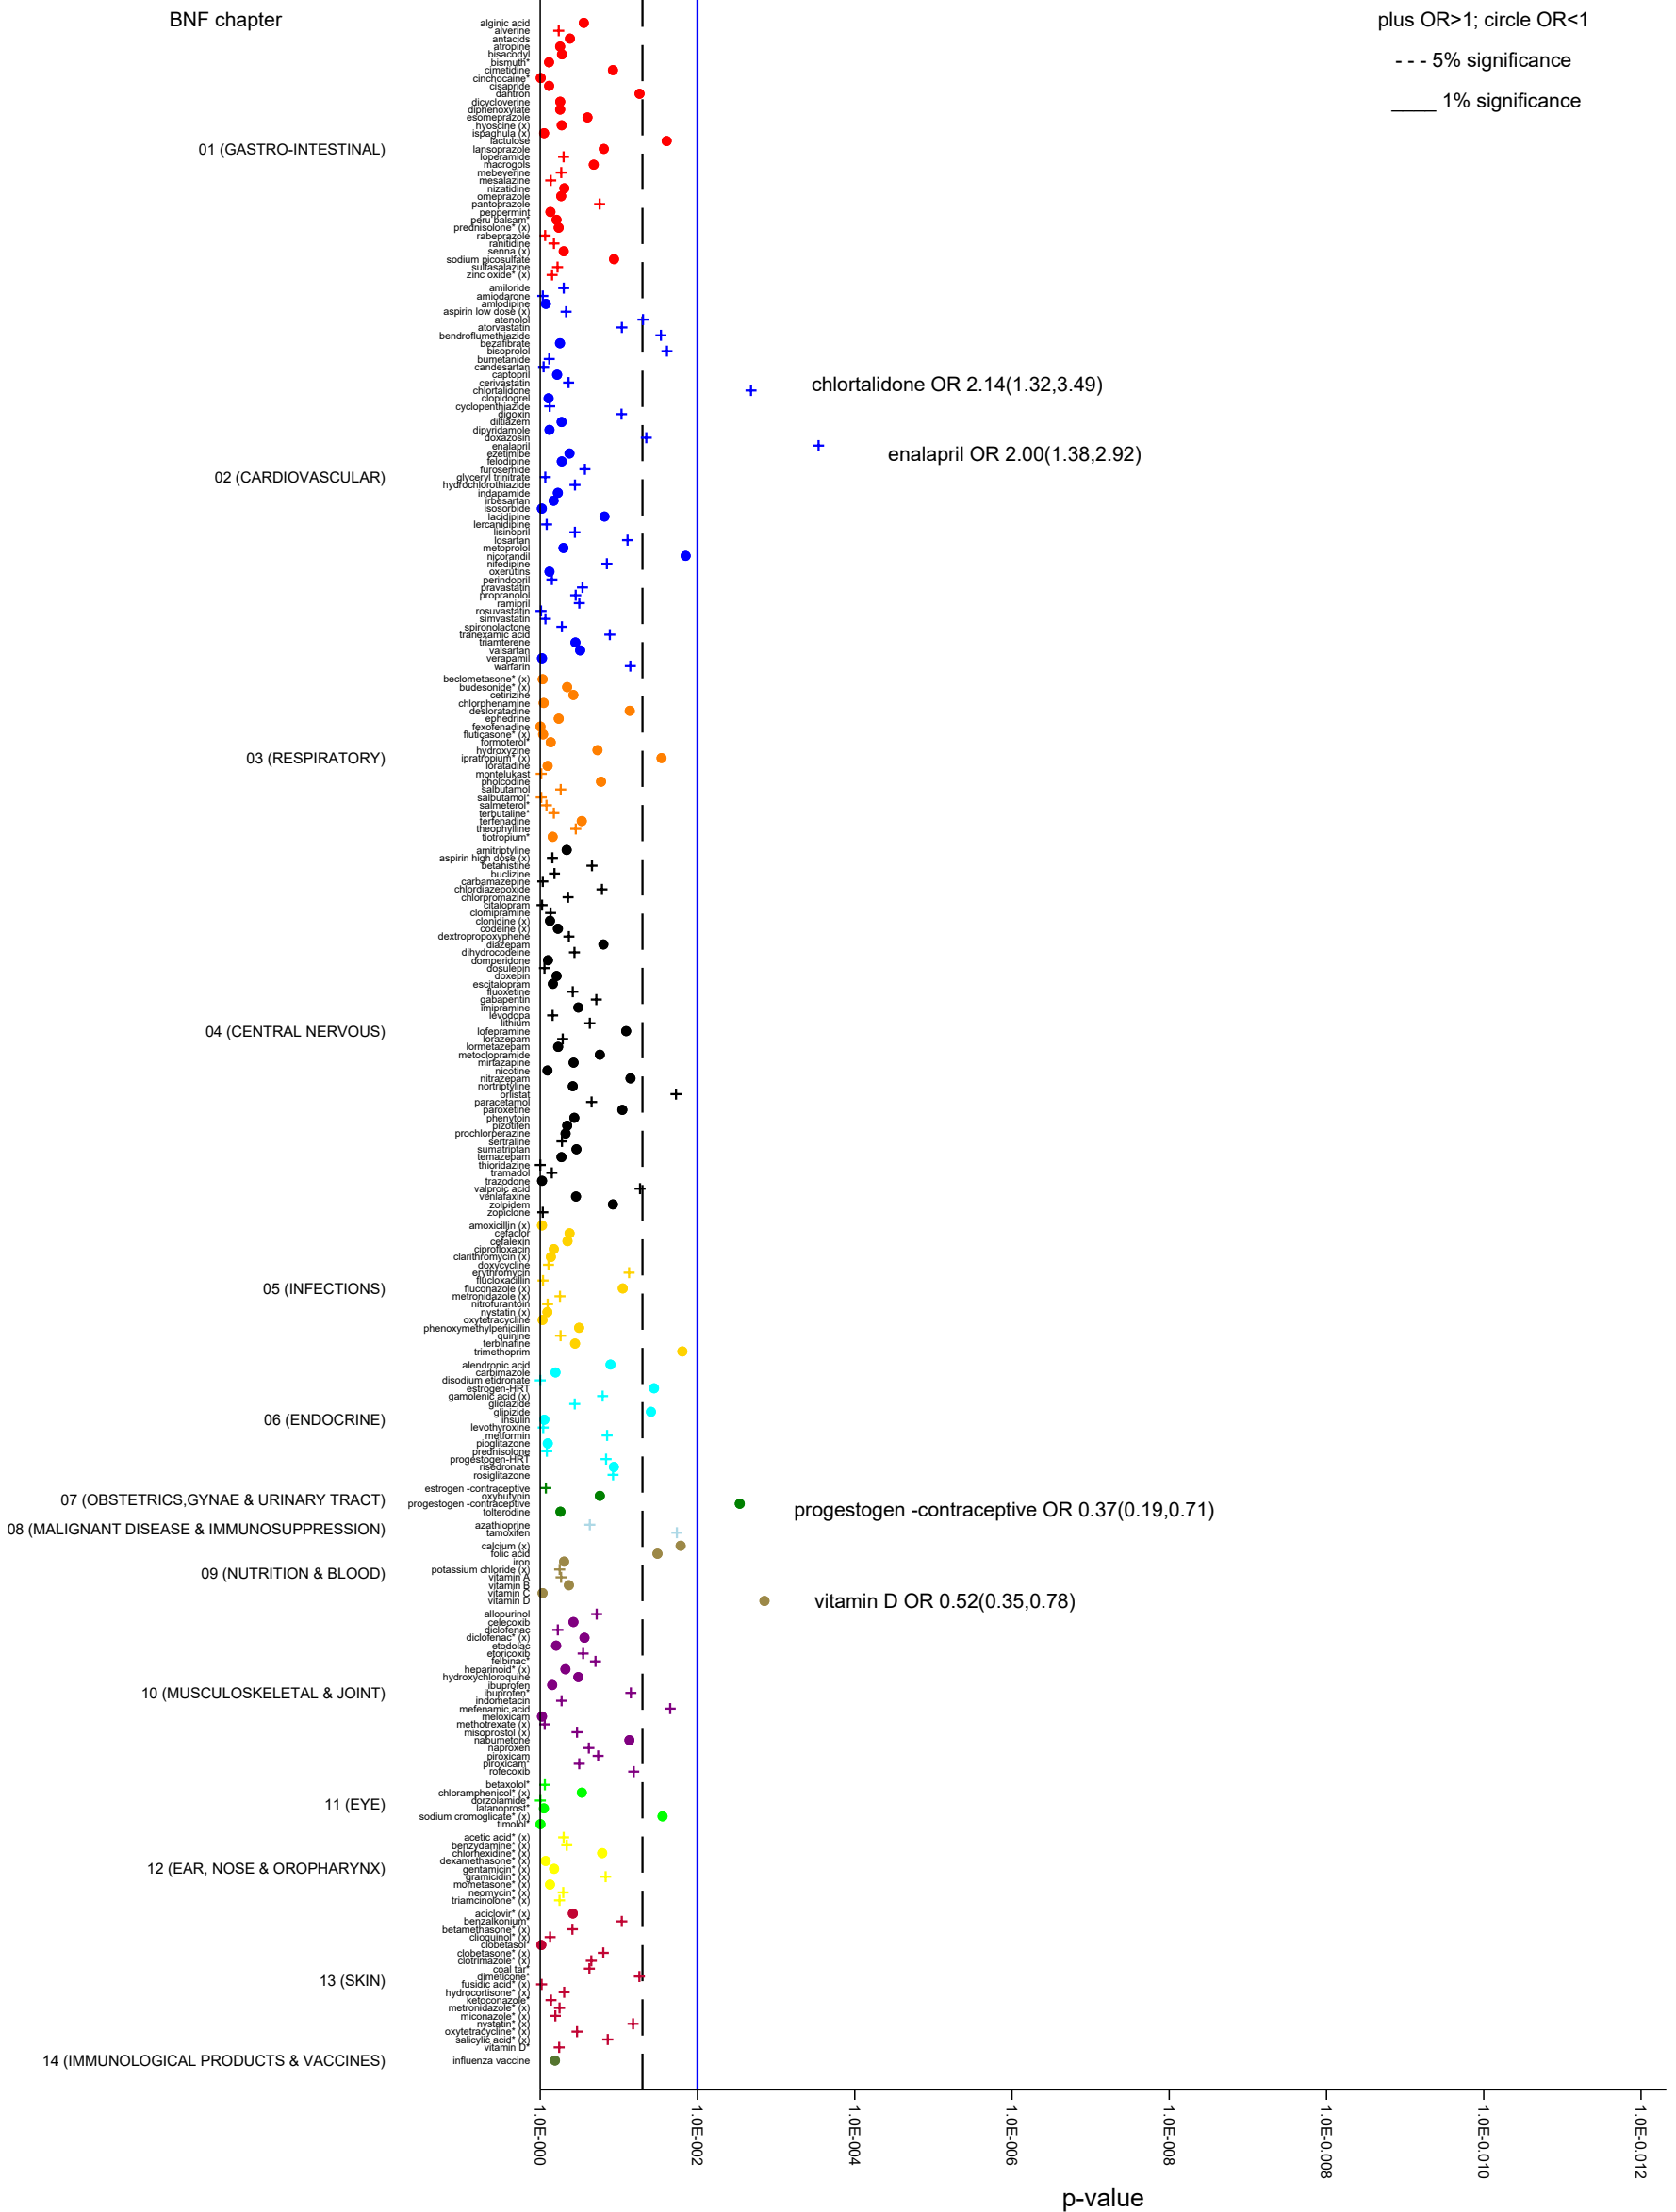

Comorbidity & smoking adjusted analysis (exposure any prescription)

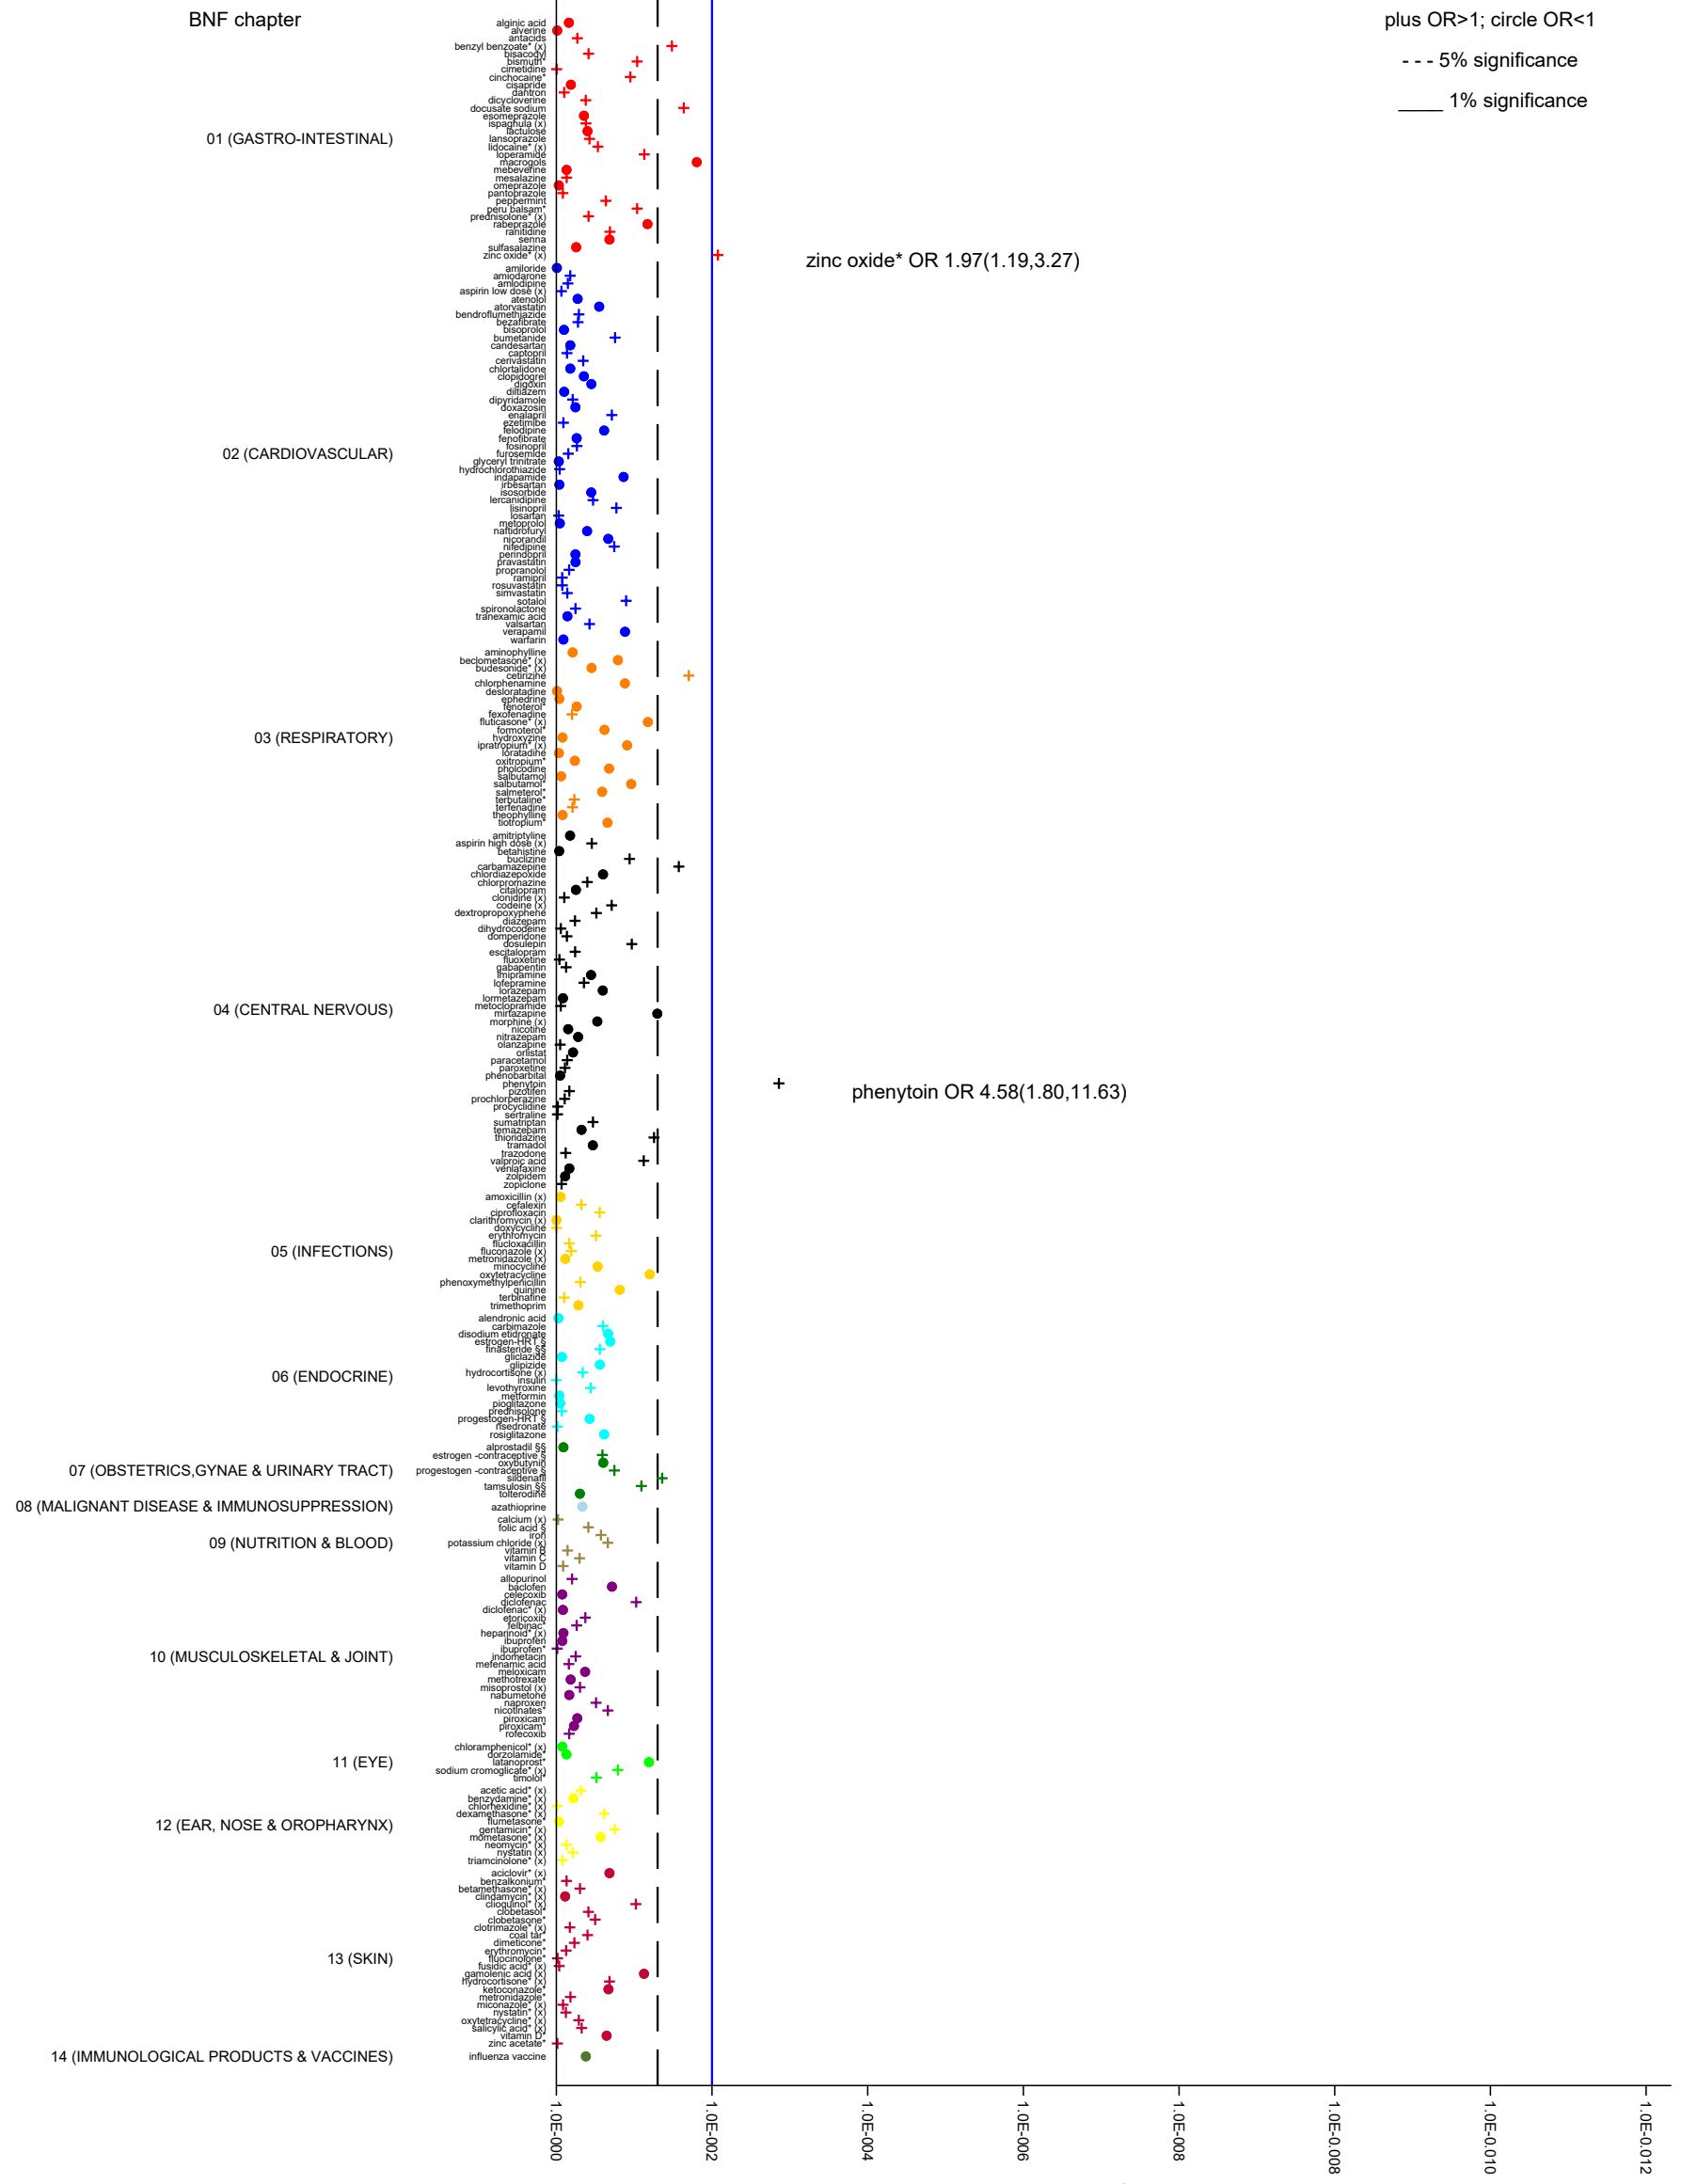

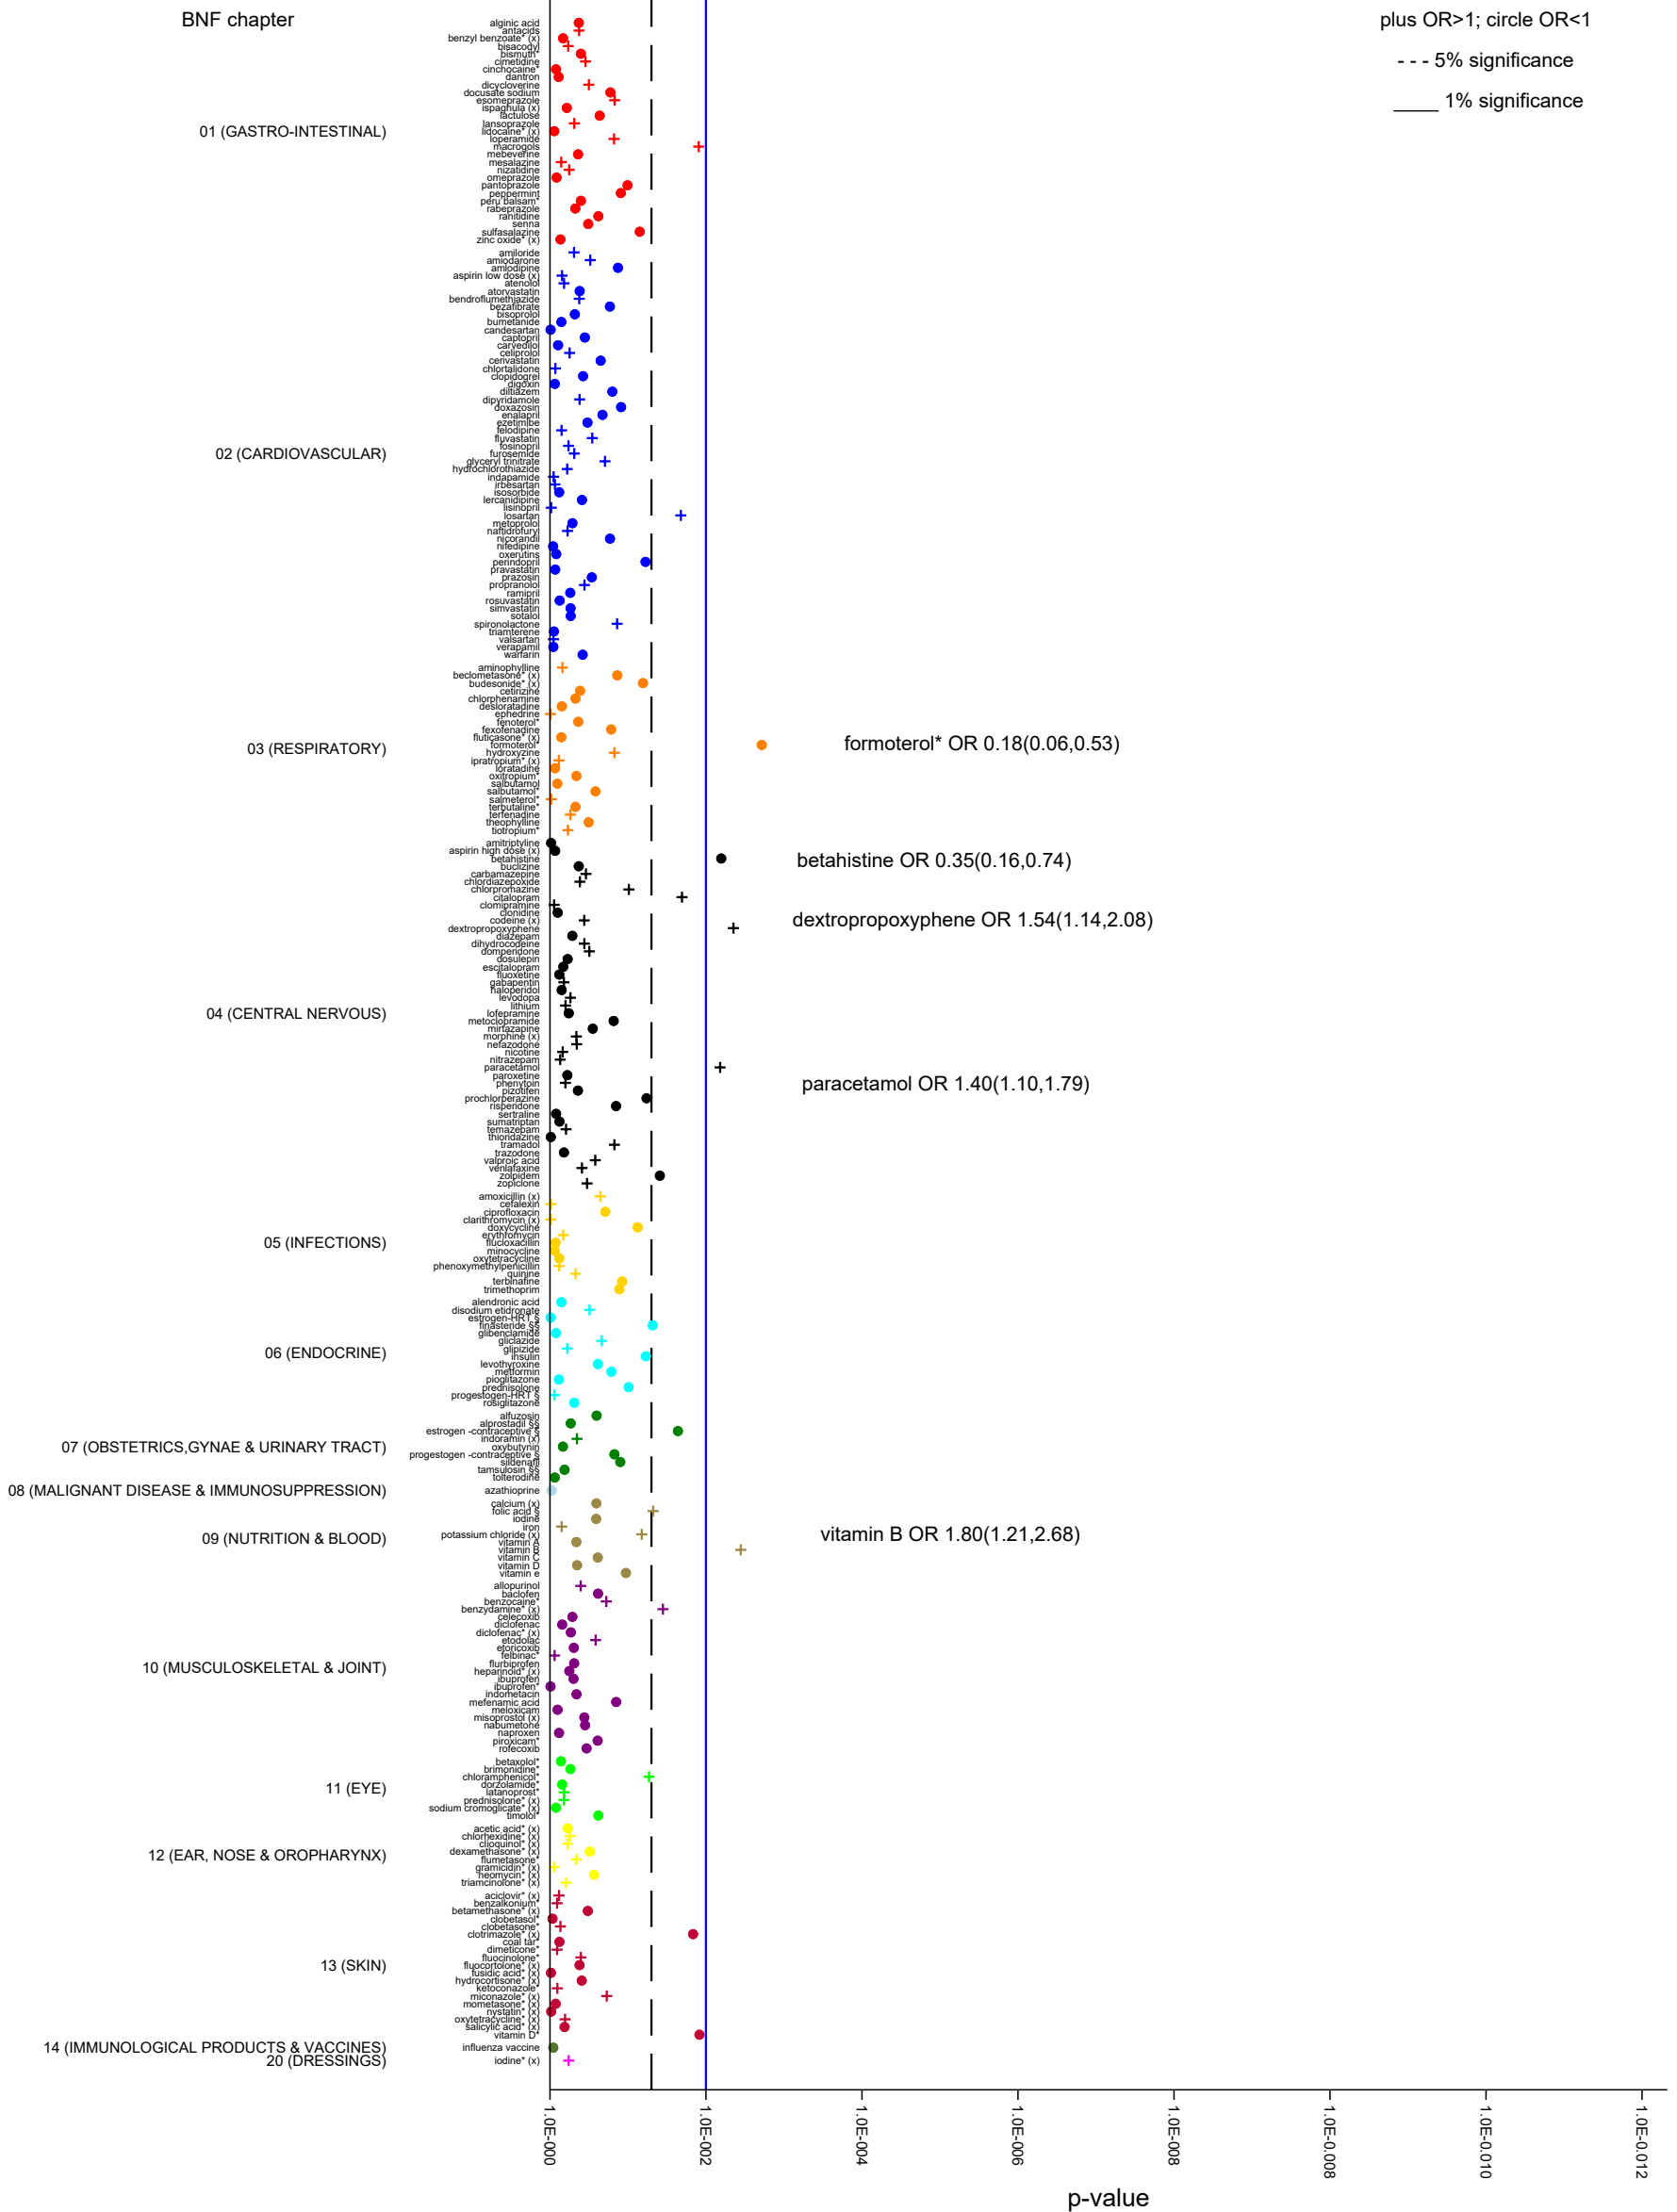

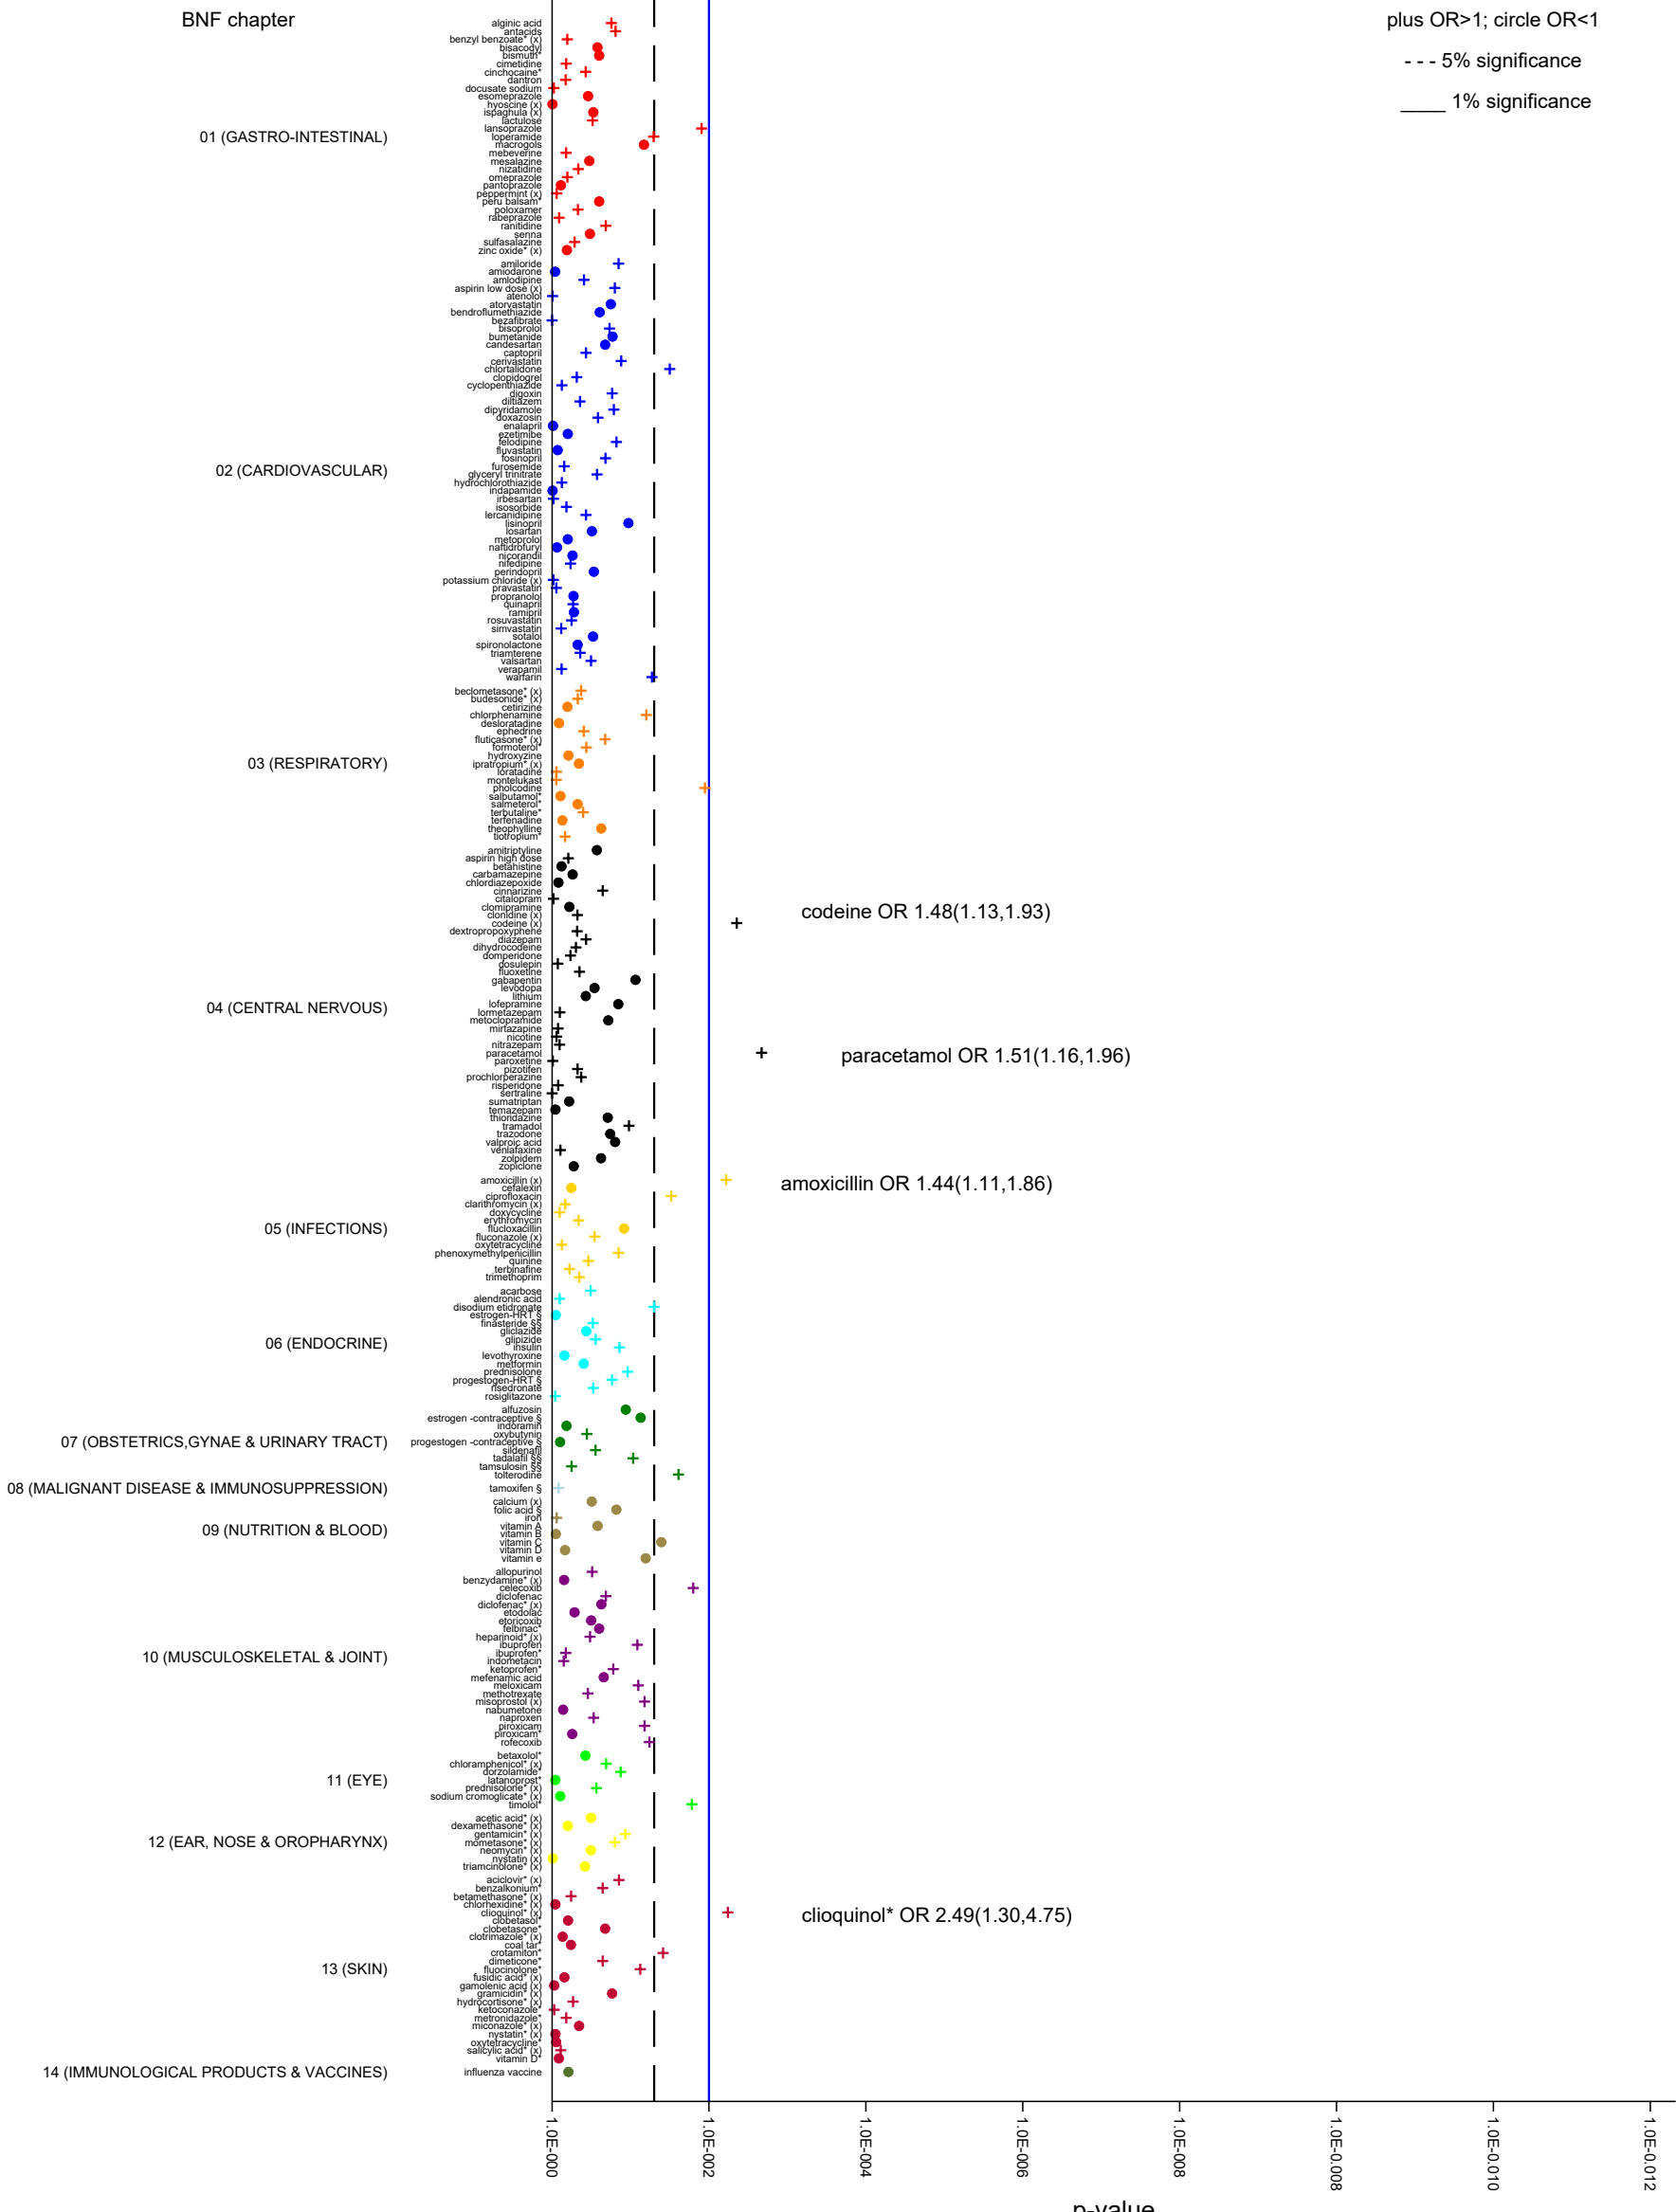

\* : local medicine; § females only; §§ males only; (x) most prevalent chapter

Comorbidity & smoking adjusted analysis (exposure any prescription)

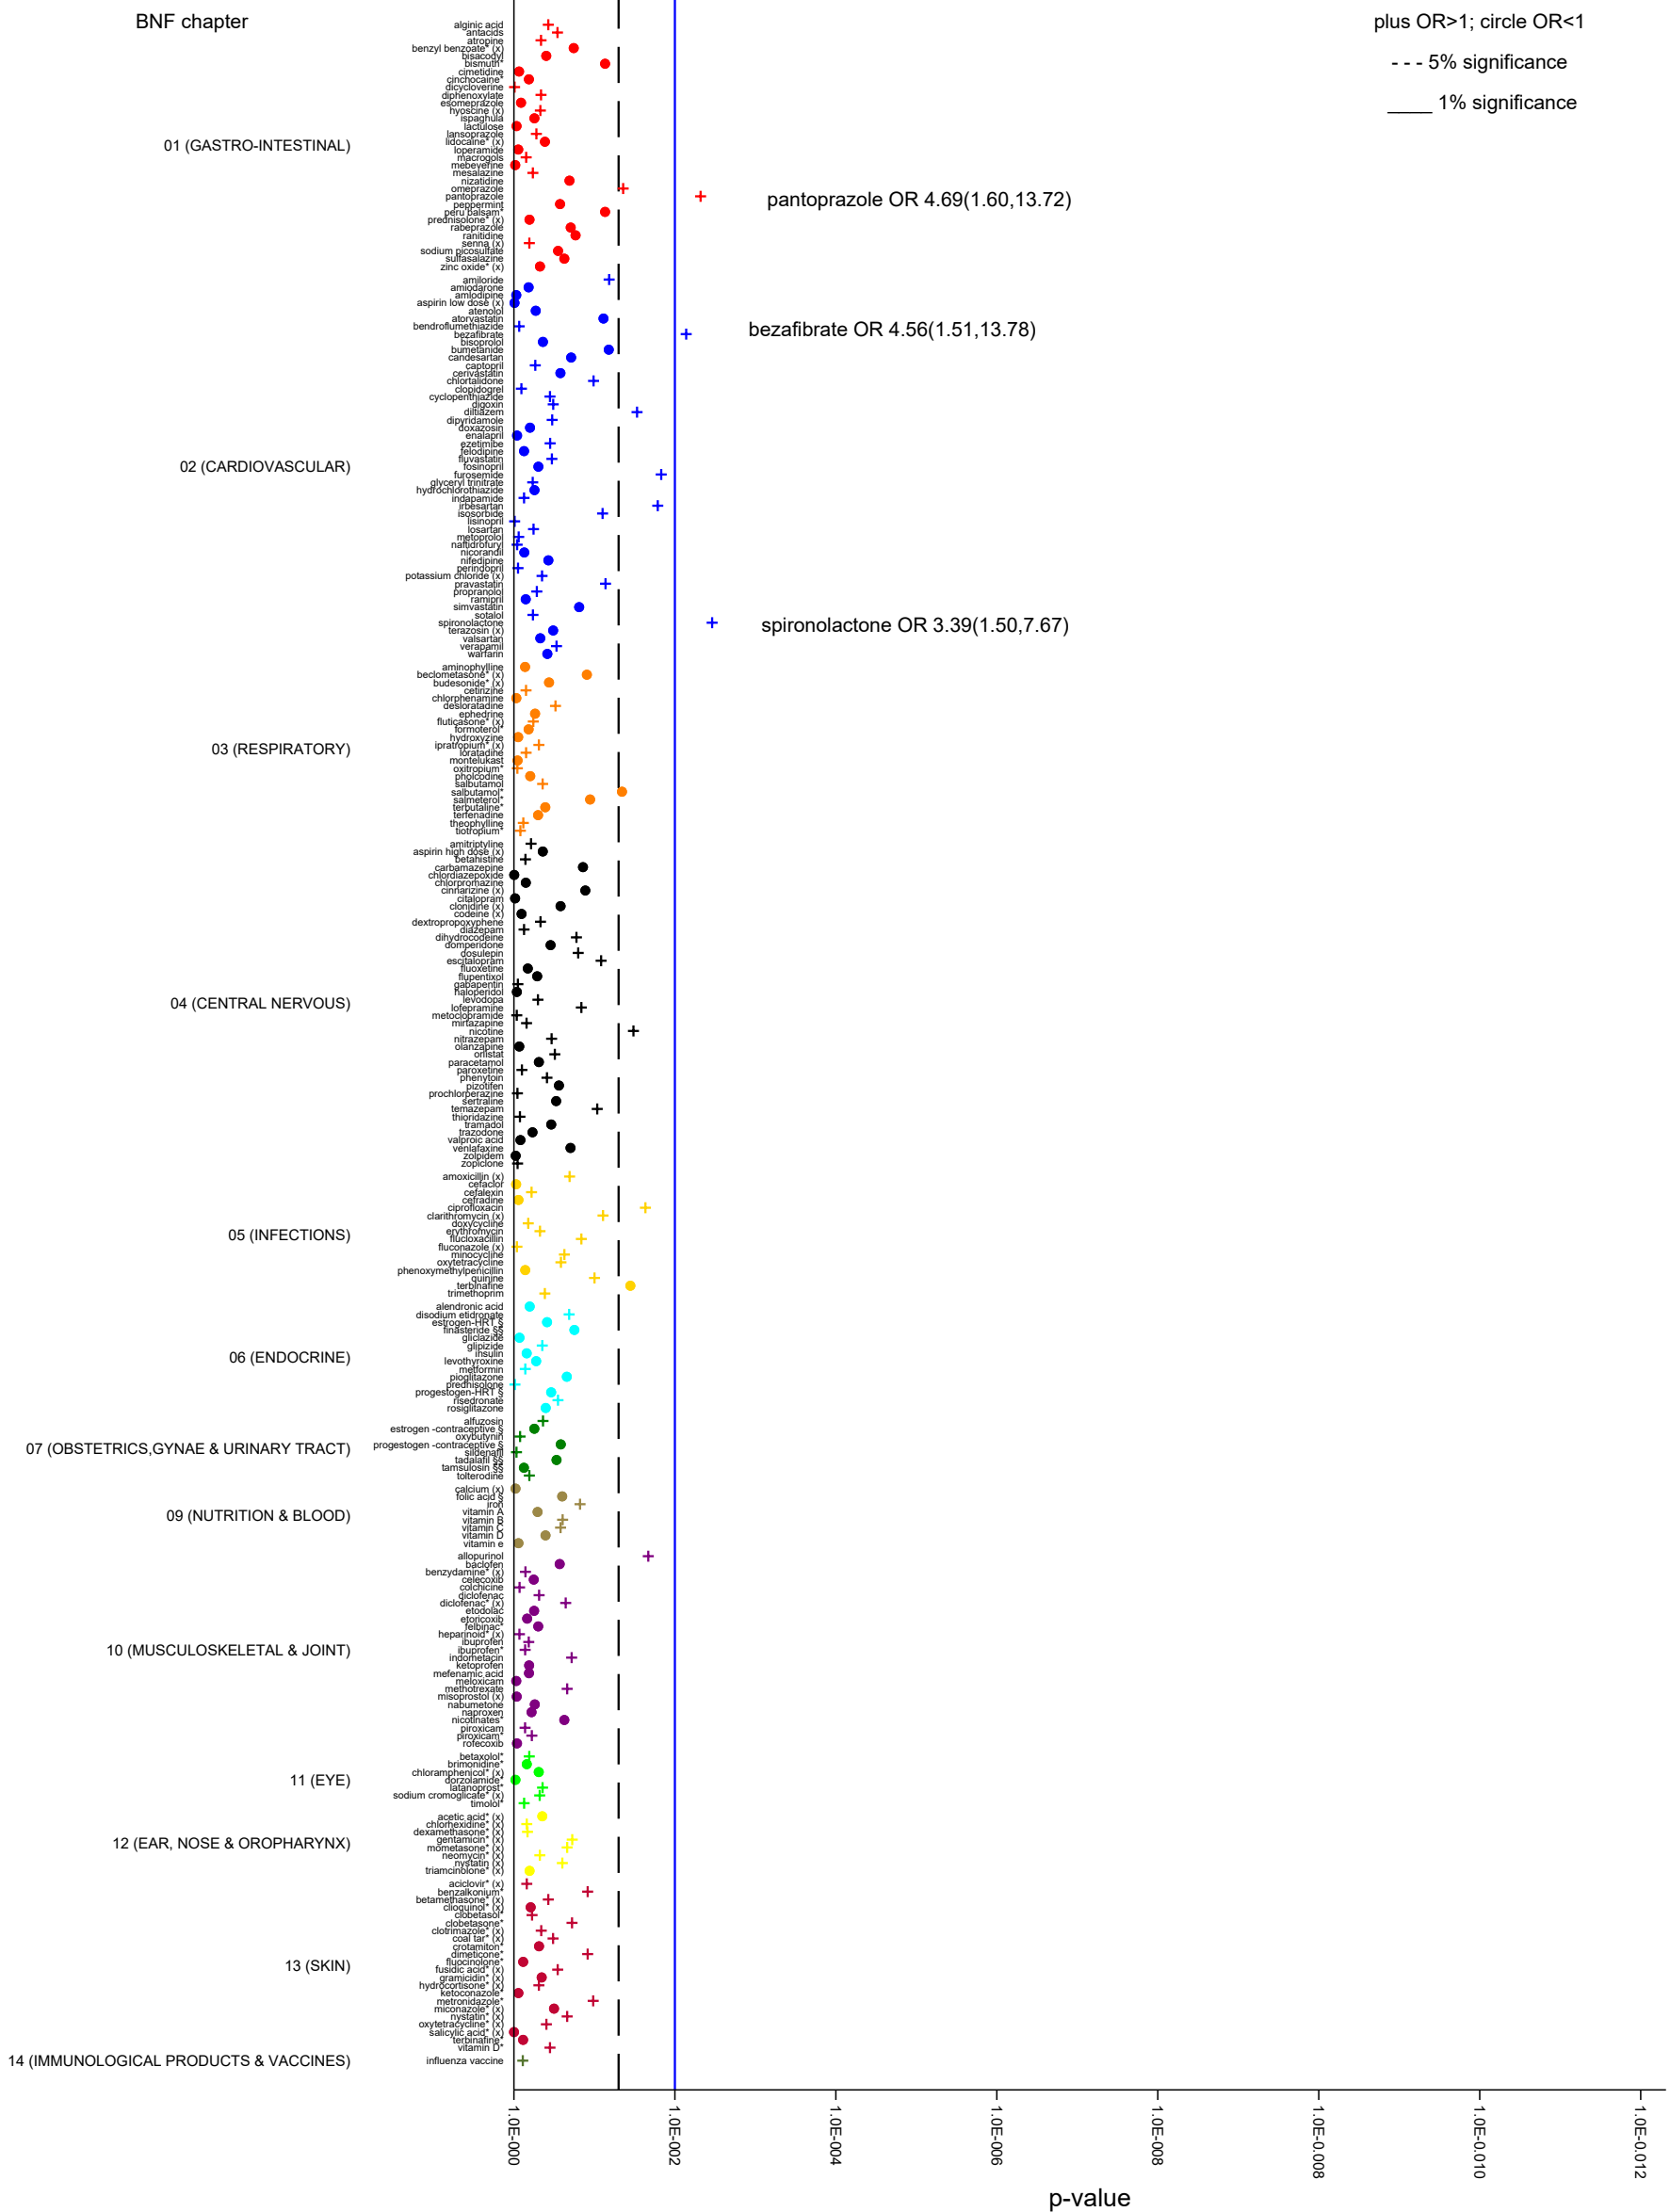

\* : local medicine; § females only; §§ males only; (x) most prevalent chapter

MWAS plot: thyroid cancer  
Comorbidity & smoking adjusted analysis (exposure any prescription)

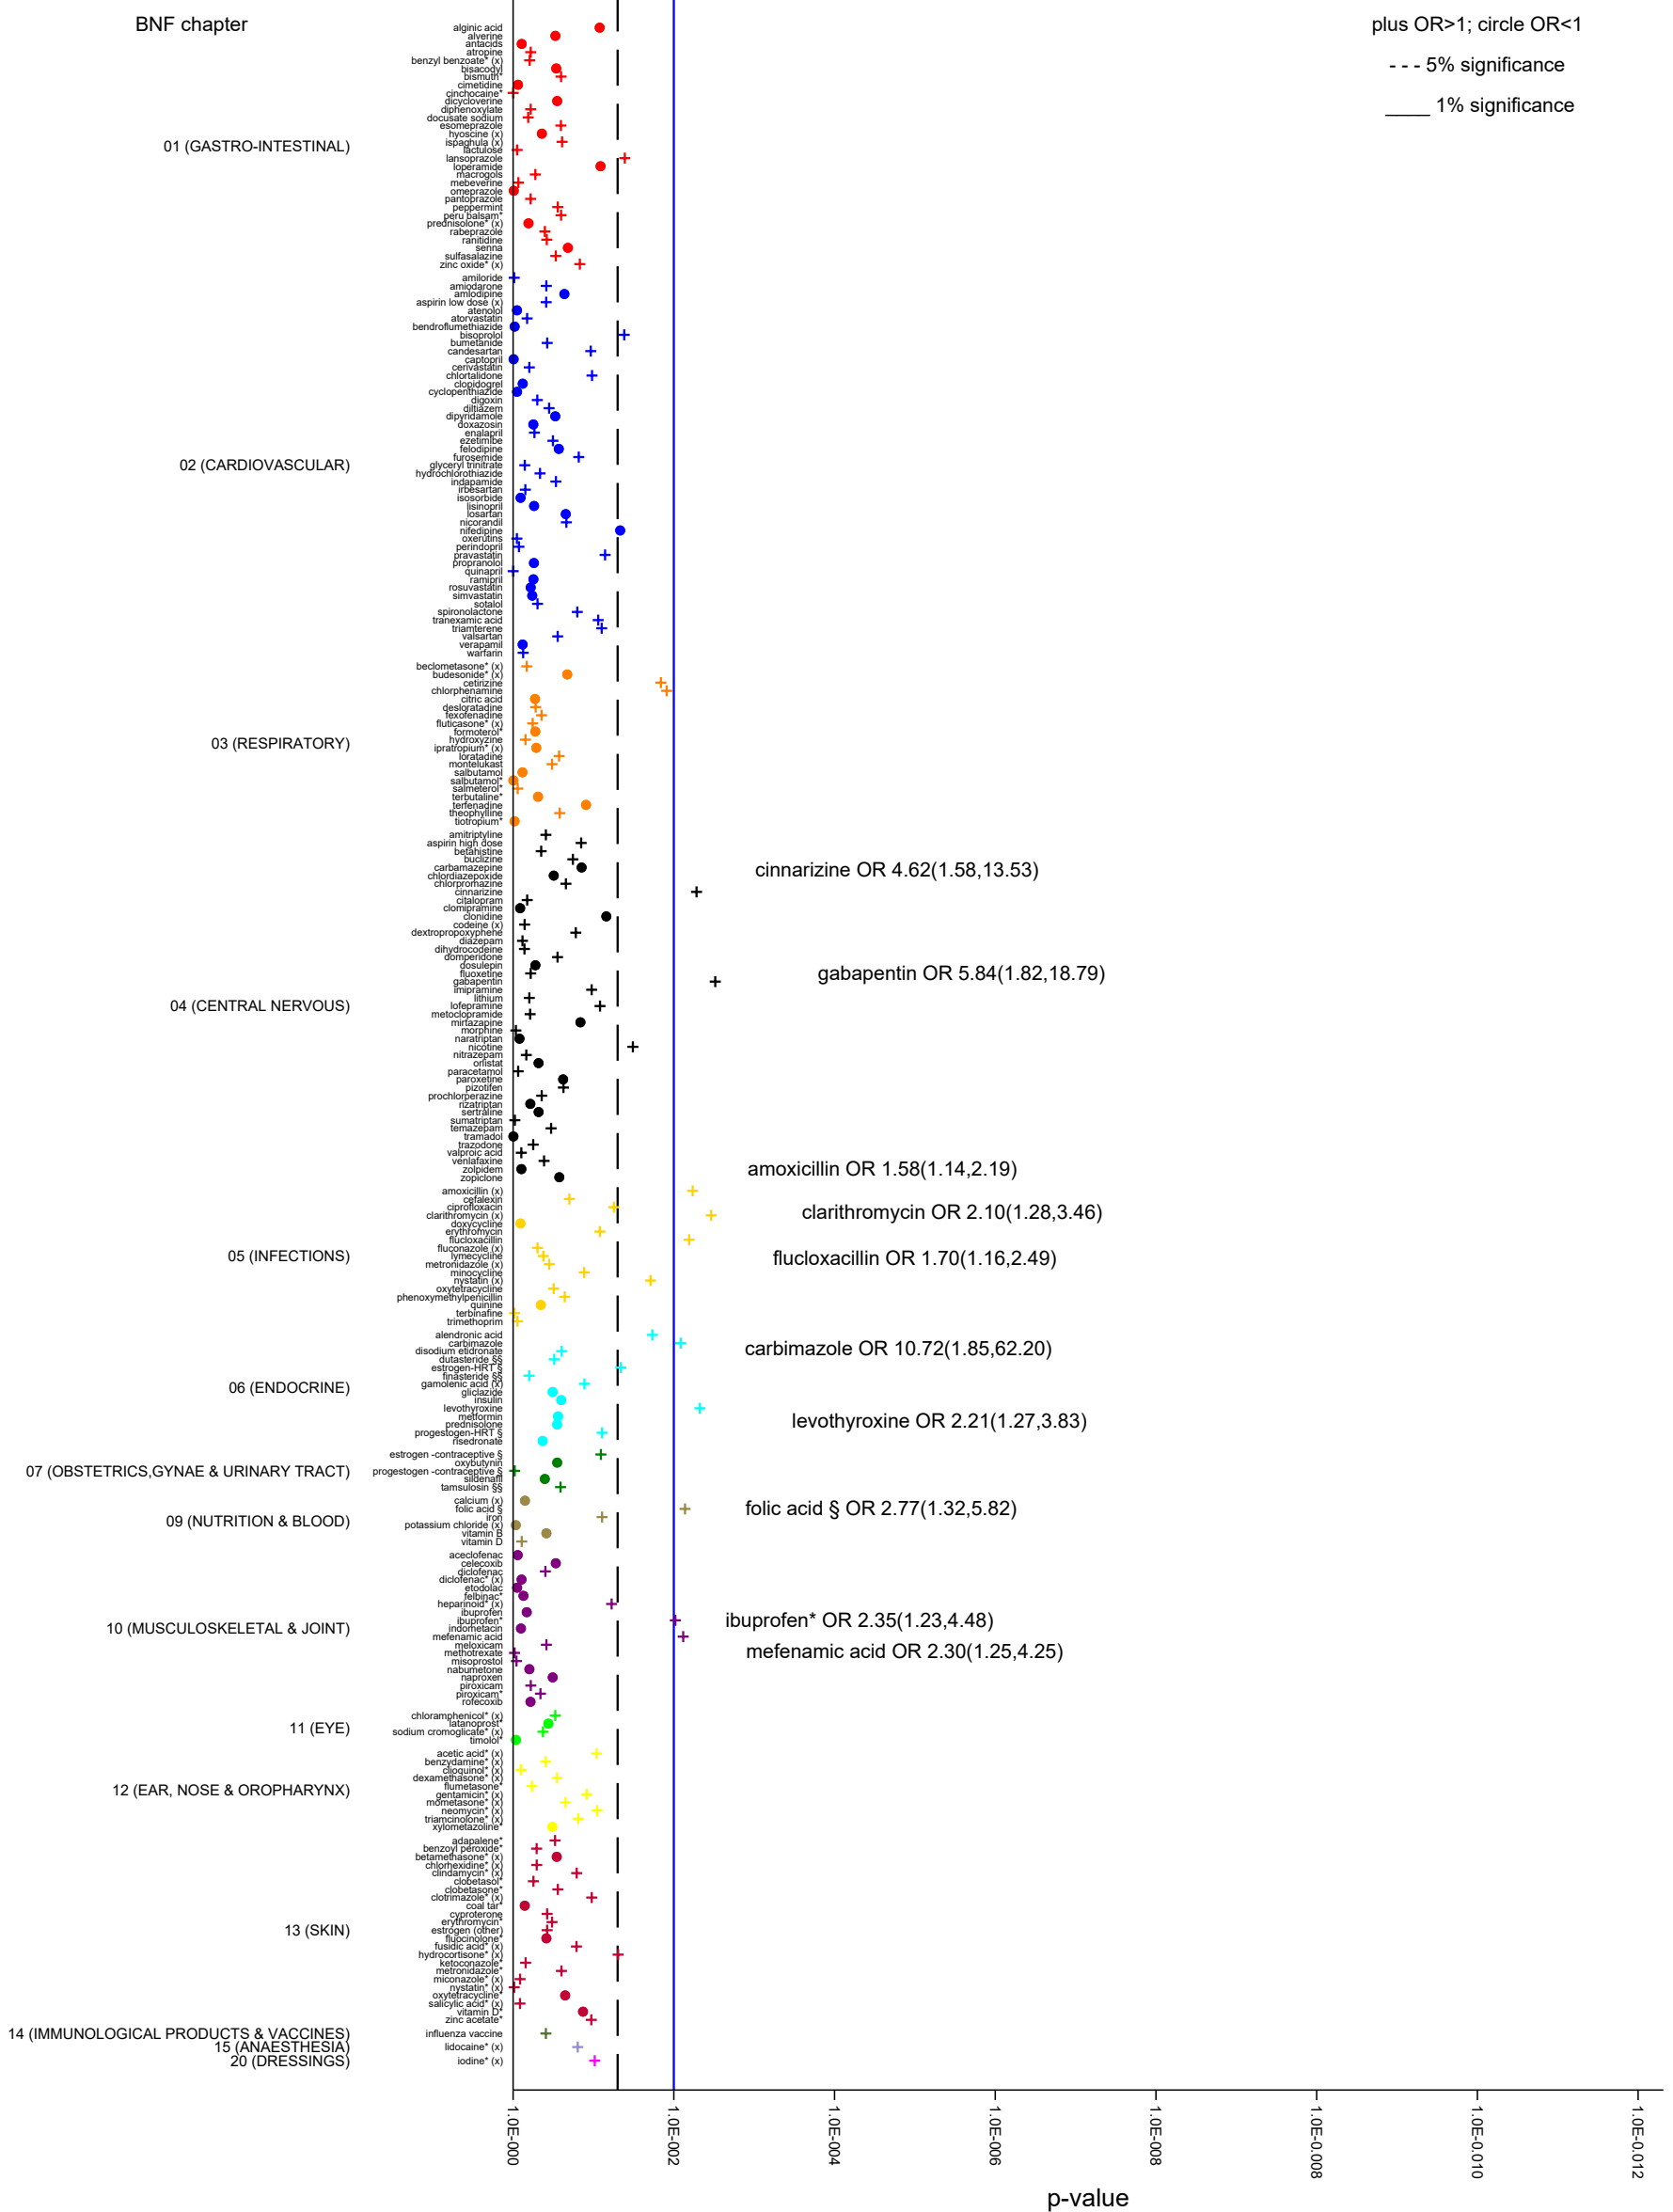

Comorbidity & smoking adjusted analysis (exposure any prescription)

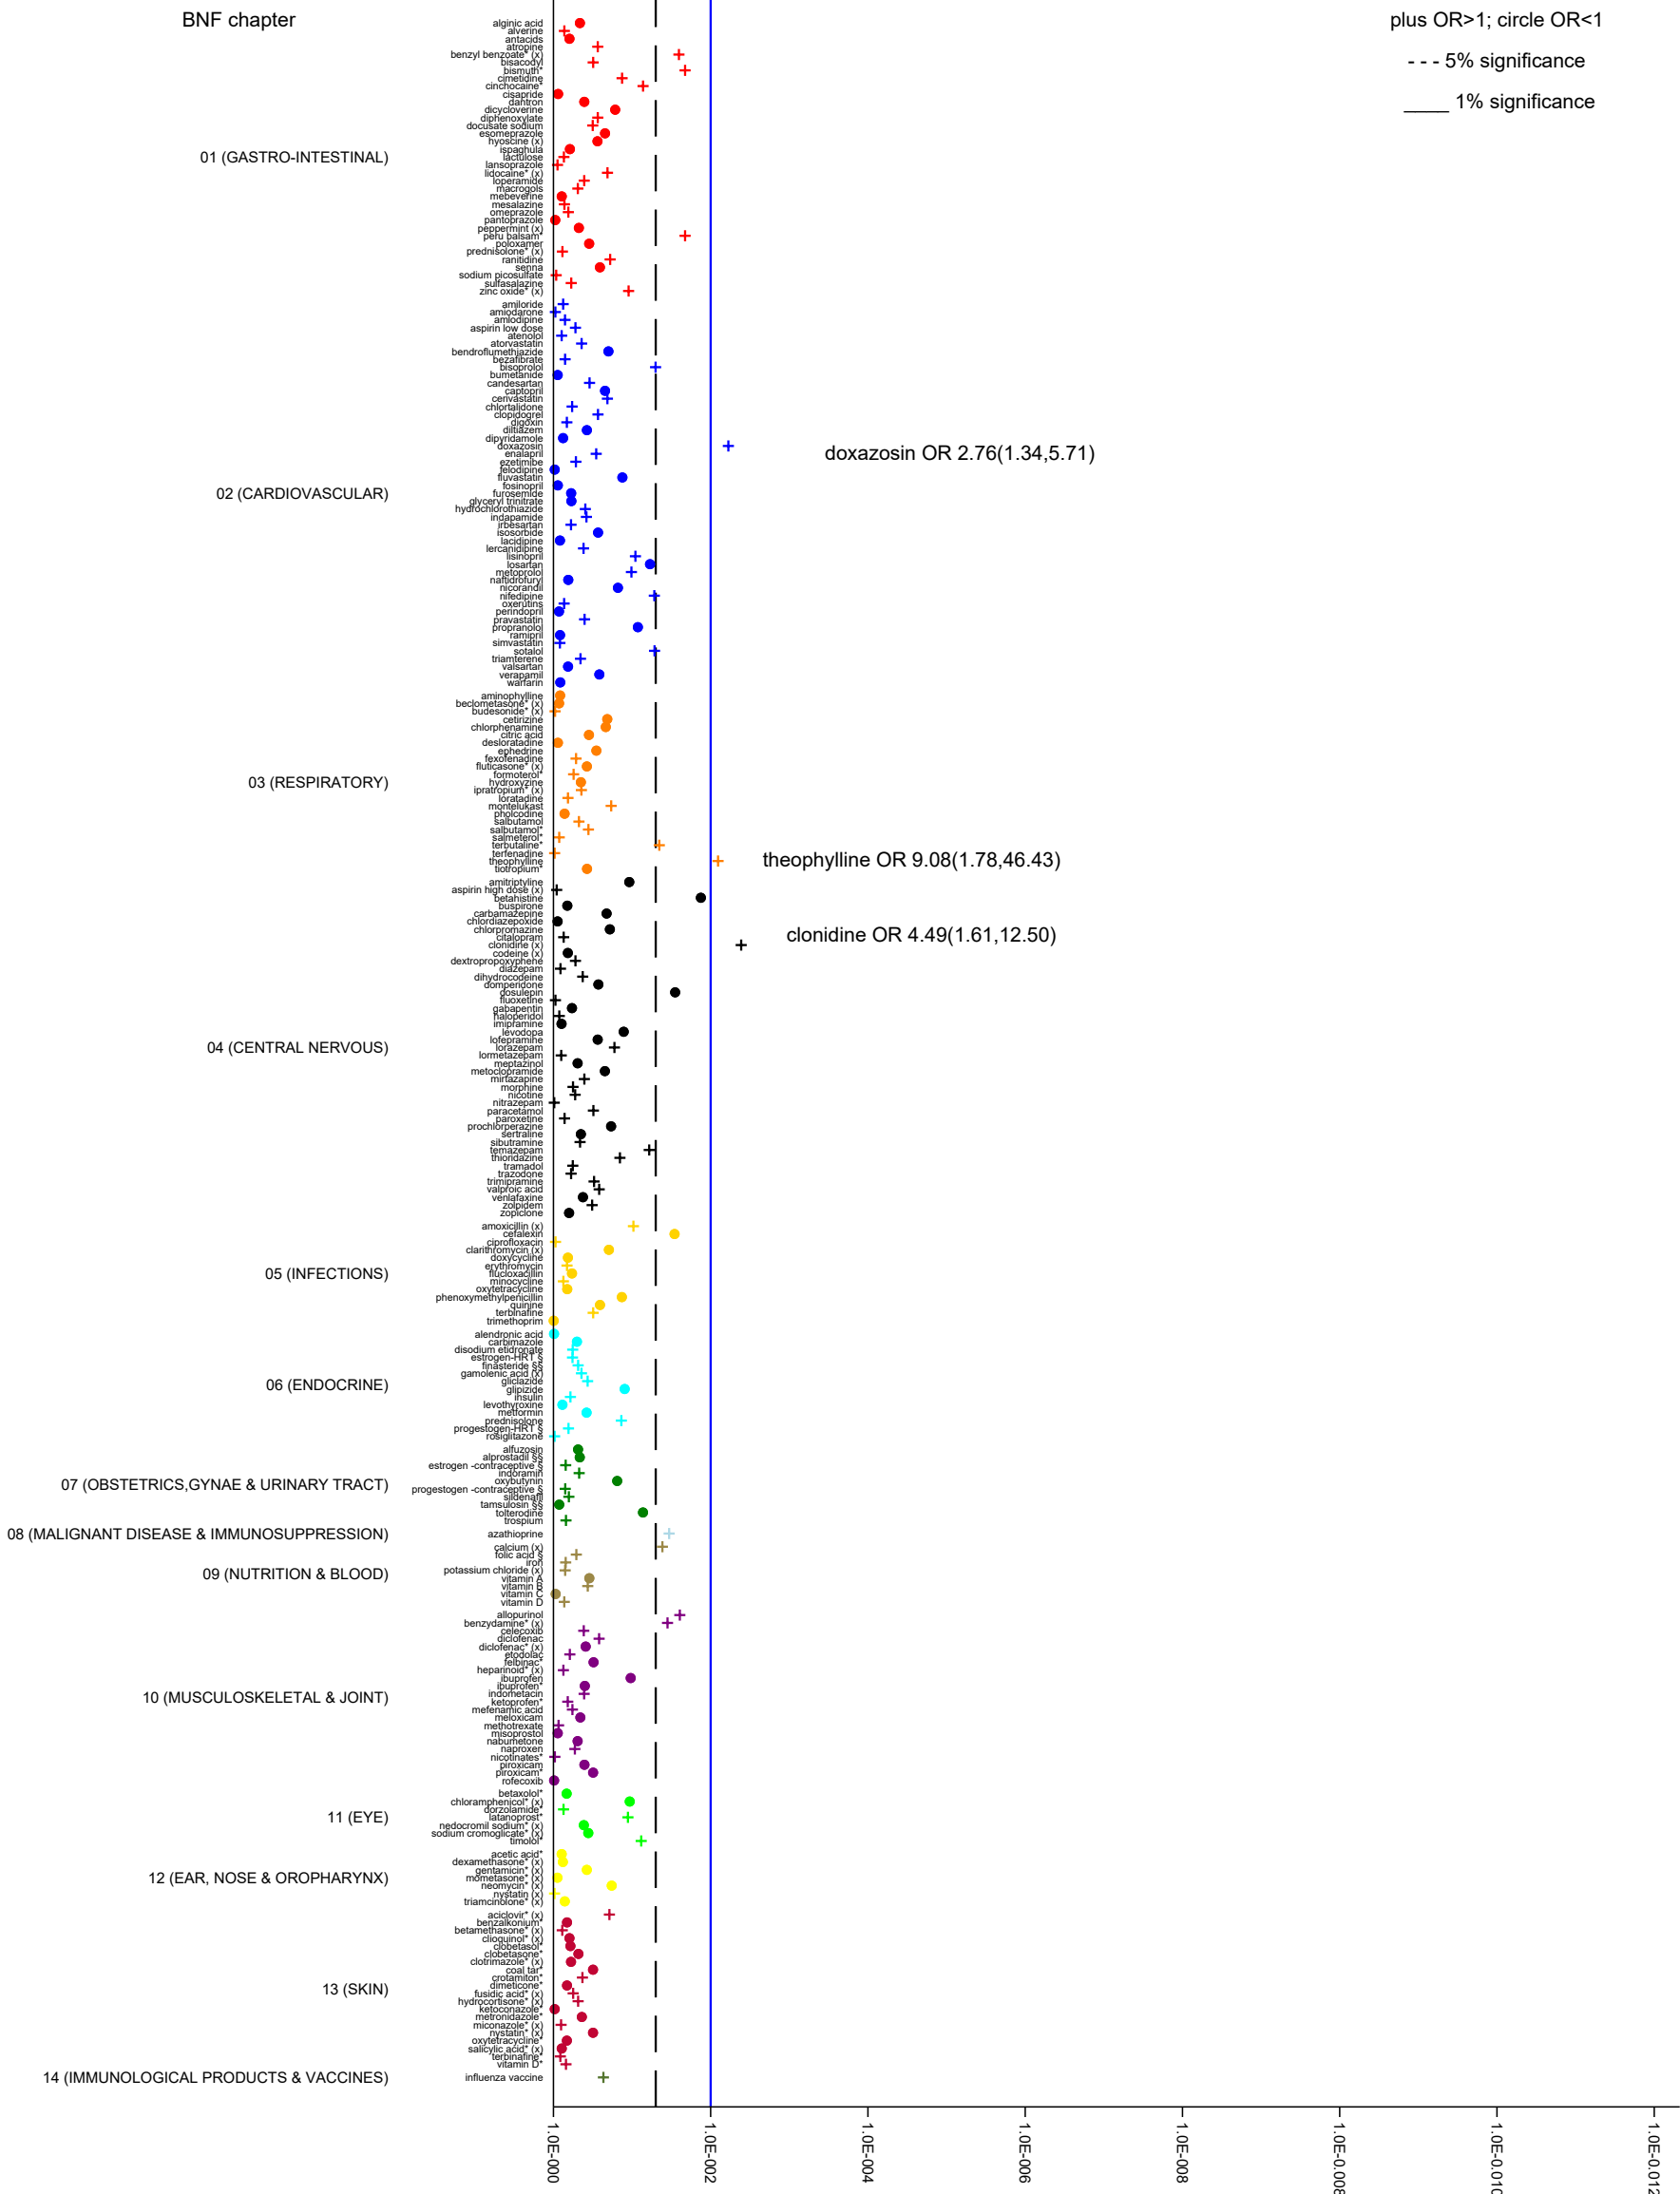

\* : local medicine; § females only; §§ males only; (x) most prevalent chapter
